# Supplementary material for: Modeling Heterogeneity of Triple-Negative Breast Cancer Uncovers a Novel Combinatorial Treatment Overcoming Primary Drug Resistance
Source: bioRxiv or medRxiv preprint supplement (doi:10.1101/2020.06.22.164418), 2020-08-10
Supplement: Supplementary file [file media-2.pdf]

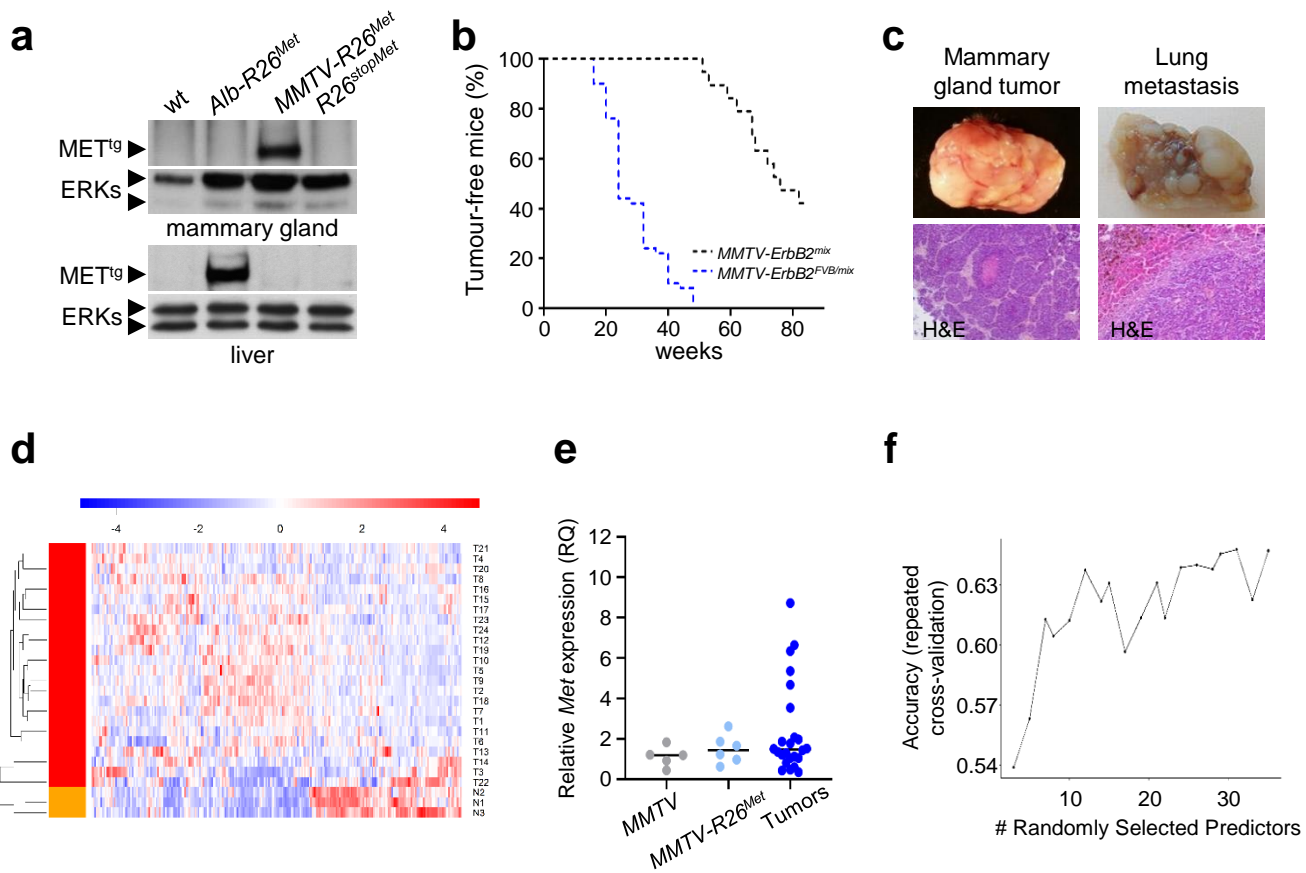

Figure S1

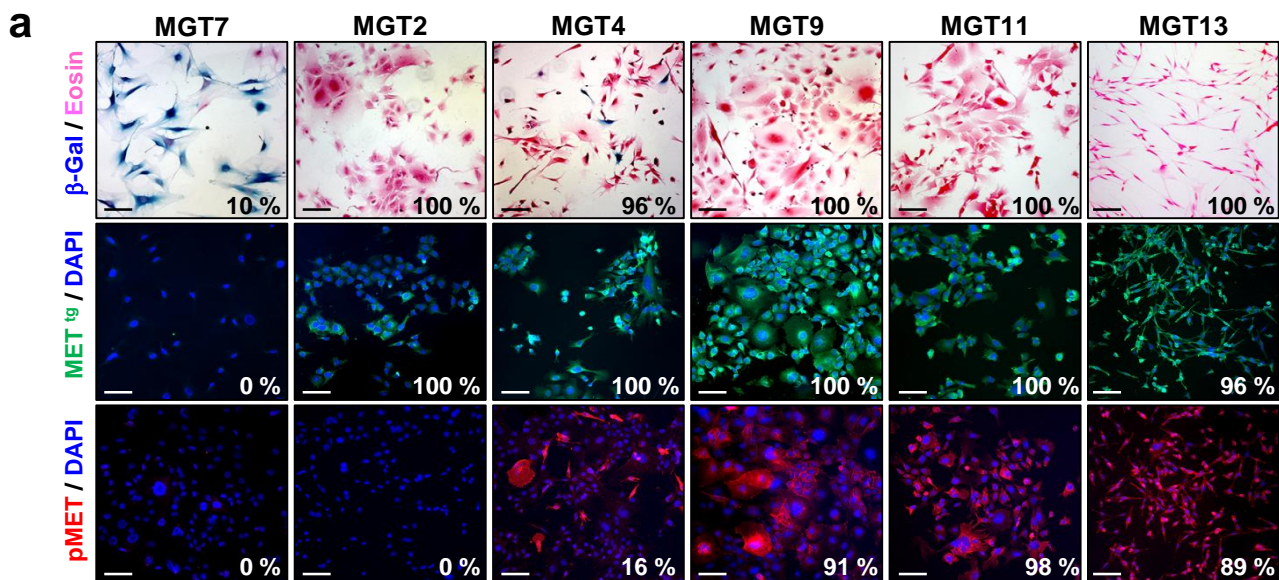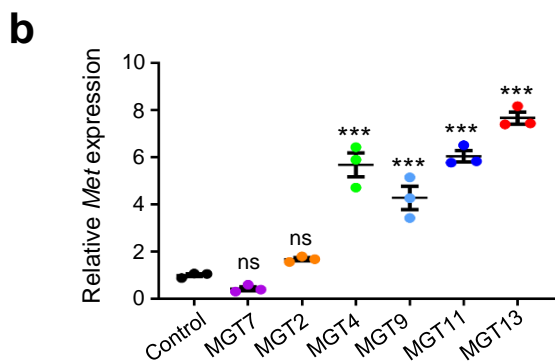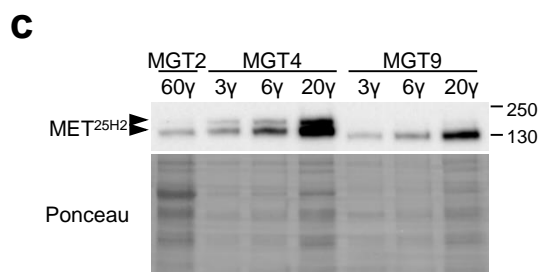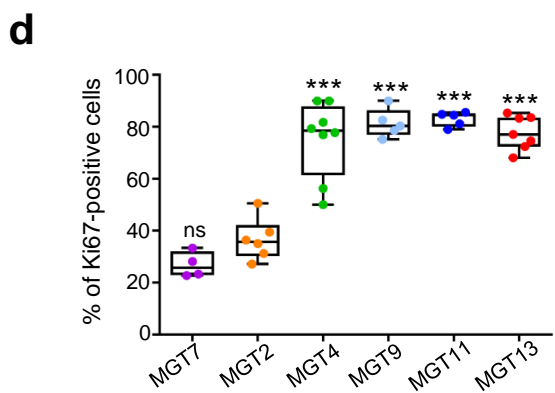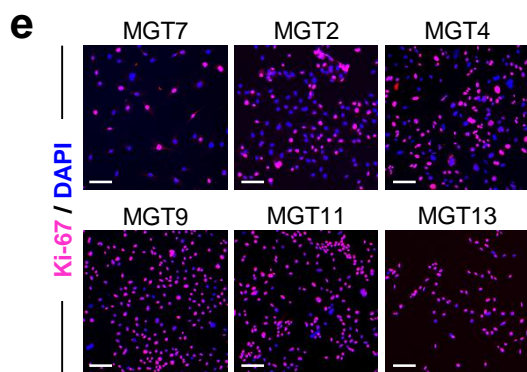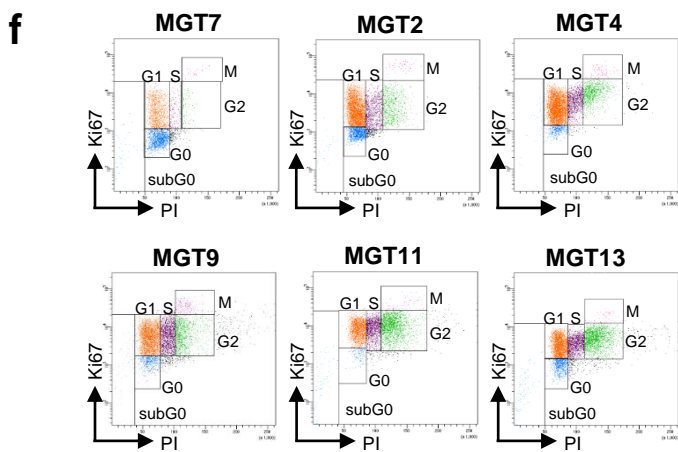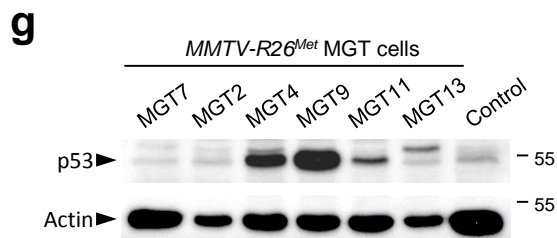

Figure S2

**a**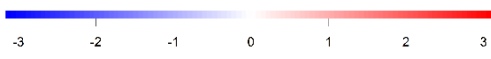

MGT7  
MGT7  
MGT2  
MGT2  
MGT13  
MGT13  
MGT13  
MGT9  
MGT9  
MGT9  
MGT11  
MGT11  
MGT11  
MGT4  
MGT4  
MGT4

**b**

— Subtype A versus Pre-tumorigenic —    — Subtype B versus Pre-tumorigenic —    — Subtype B versus Subtype A —

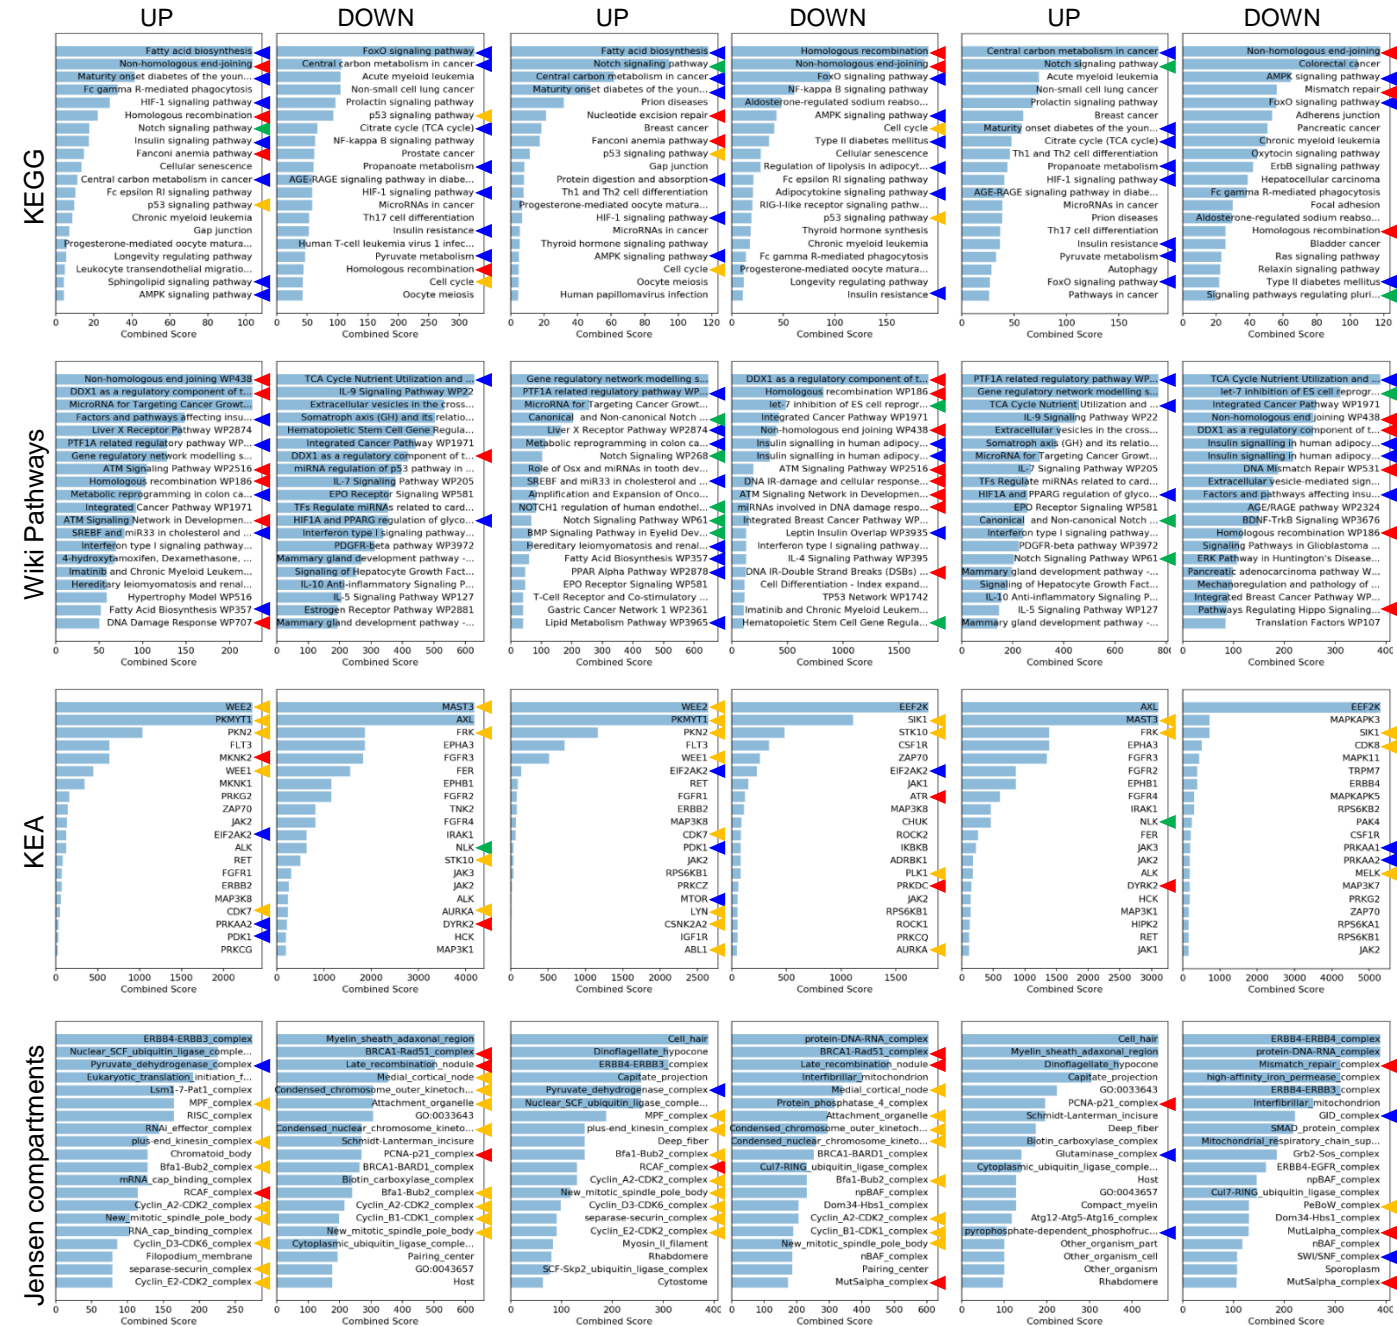

◀ DNA repair    ◀ Metabolism    ◀ Cell cycle    ◀ Stemness

**Figure S3**

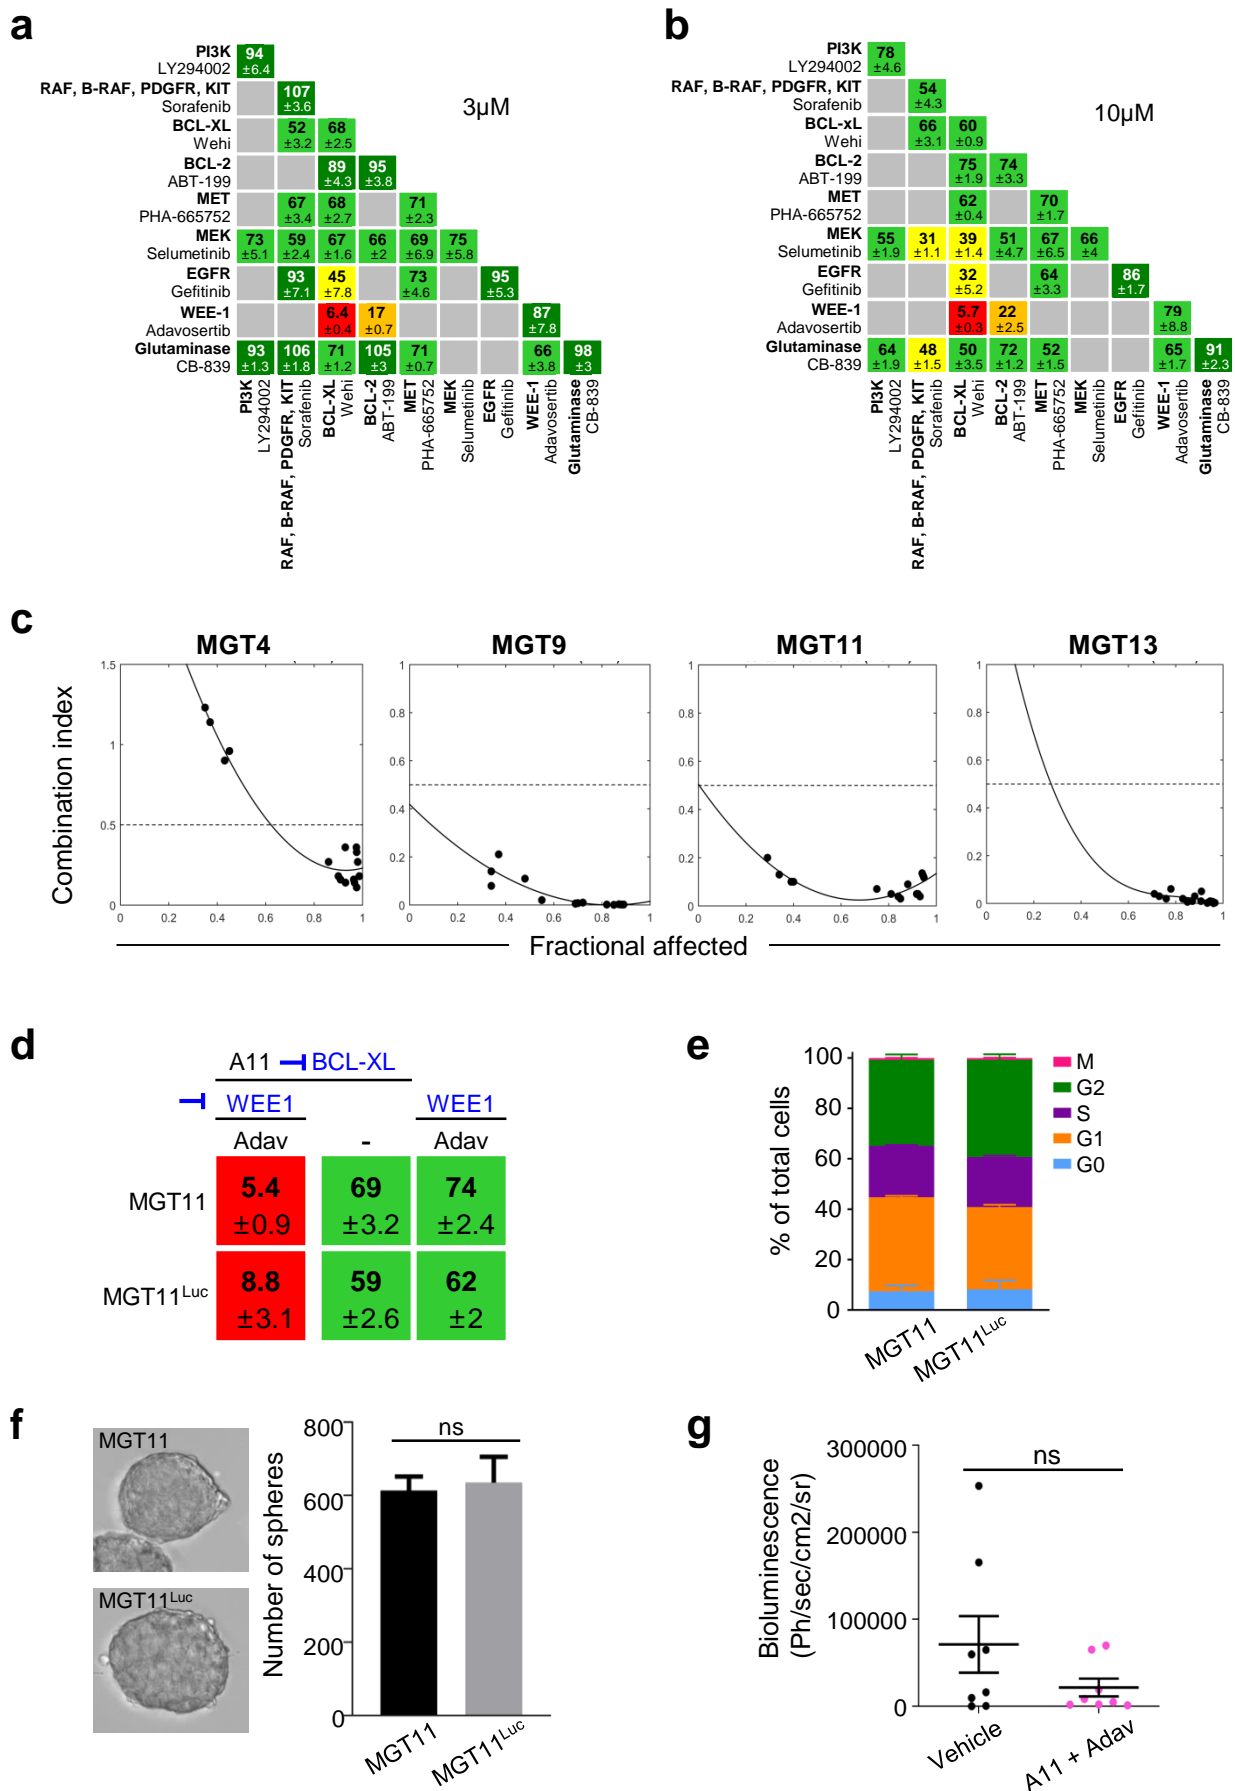

Figure S4

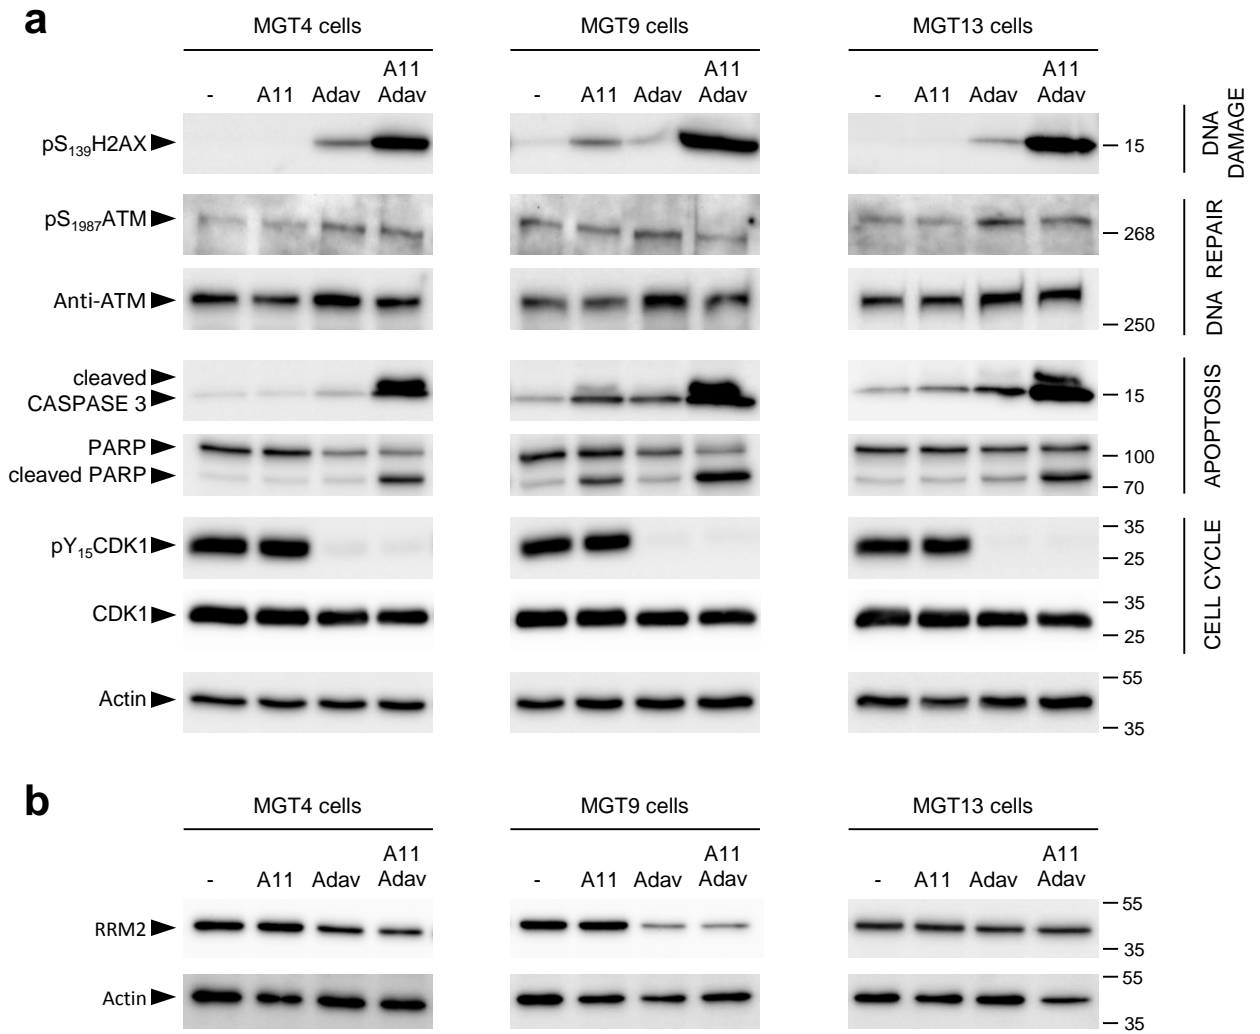

Figure S5
