# Supplementary material for: Modeling Heterogeneity of Triple-Negative Breast Cancer Uncovers a Novel Combinatorial Treatment Overcoming Primary Drug Resistance
Source: bioRxiv or medRxiv preprint supplement (doi:10.1101/2020.06.22.164418), 2020-08-10
Supplement: Supplementary file [file media-3.pdf]

**Table S1:** Mammary gland (tumors and controls) used for histopathological and RPPA analyses.

| Mouse #              | Genotype                      | Gross aspect of gland | Histopathological analysis |       |          |                |                    |     | Lung metastases | RPPA (Tumor #) |
|----------------------|-------------------------------|-----------------------|----------------------------|-------|----------|----------------|--------------------|-----|-----------------|----------------|
|                      |                               |                       | Tumor state                | Grade | Necrosis | Prolif. status | ER/PR/HER2 scoring | Met |                 |                |
| 669 201              | <i>MMTV-R26<sup>Met</sup></i> | Tumour                | carcinoma                  | nd    | nd       | nd             | 0                  | nd  | Yes             | Yes (T1)       |
| 669 352              | <i>MMTV-R26<sup>Met</sup></i> | Tumour                | carcinoma                  | nd    | +        | nd             | 0                  | nd  | Yes             | Yes (T2)       |
| 669 713              | <i>MMTV-R26<sup>Met</sup></i> | Tumour                | carcinoma                  | nd    | nd       | nd             | 0                  | nd  | _               | Yes (T3)       |
| 669 163              | <i>MMTV-R26<sup>Met</sup></i> | Tumour                | carcinoma                  | nd    | nd       | nd             | 0                  | nd  | _               | Yes (T4)       |
| 669 789              | <i>MMTV-R26<sup>Met</sup></i> | Tumour                | carcinoma                  | nd    | nd       | nd             | 0                  | nd  | Yes             | Yes (T5)       |
| 669 722              | <i>MMTV-R26<sup>Met</sup></i> | Tumour                | carcinoma                  | nd    | nd       | nd             | 0                  | nd  | Yes             | Yes (T6)       |
| 669 175              | <i>MMTV-R26<sup>Met</sup></i> | Tumour                | carcinoma                  | nd    | nd       | nd             | 0                  | nd  | _               | Yes (T7)       |
| 669 715              | <i>MMTV-R26<sup>Met</sup></i> | Tumour                | carcinoma                  | nd    | nd       | nd             | 0                  | nd  | _               | Yes (T8)       |
| 671 802<br>(Tumor A) | <i>MMTV-R26<sup>Met</sup></i> | Tumour                | carcinoma                  | 3     | +        | 3              | 0                  | +   | _               | Yes (T9)       |
| 671 607              | <i>MMTV-R26<sup>Met</sup></i> | Tumour                | carcinoma                  | 3     | +        | 3              | 0                  | +   | _               | Yes (T10)      |
| 671 662              | <i>MMTV-R26<sup>Met</sup></i> | Tumour                | carcinoma                  | 3     | ++       | 2              | 0                  | +   | _               | Yes (T11)      |
| 671 670              | <i>MMTV-R26<sup>Met</sup></i> | Tumour                | carcinoma                  | 3     | +(+)     | 3              | 0                  | +   | Yes             | Yes (T12)      |
| 671 975              | <i>MMTV-R26<sup>Met</sup></i> | Tumour                | carcinoma                  | 2     | _        | 1              | 0                  | +   | _               | Yes (T13)      |
| 672 961              | <i>MMTV-R26<sup>Met</sup></i> | Tumour                | carcinoma                  | 3     | ++       | 3              | 0                  | +   | _               | Yes (T14)      |
| 671 711              | <i>MMTV-R26<sup>Met</sup></i> | Tumour                | carcinoma                  | 3     | ++       | 2              | 0                  | +   | _               | Yes (T15)      |
| 672 046              | <i>MMTV-R26<sup>Met</sup></i> | Tumour                | carcinoma                  | 3     | _        | 2              | 0                  | +   | _               | Yes (T16)      |
| 671 893              | <i>MMTV-R26<sup>Met</sup></i> | Tumour                | carcinoma                  | 3     | _        | 2              | 0                  | +   | Yes             | Yes (T17)      |
| 672 867              | <i>MMTV-R26<sup>Met</sup></i> | Tumour                | carcinoma                  | 3     | +        | 2              | 0                  | +   | _               | Yes (T18)      |
| 672 790              | <i>MMTV-R26<sup>Met</sup></i> | Tumour                | carcinoma                  | 2     | _        | 2              | 0                  | +   | _               | Yes (T19)      |
| 672 955              | <i>MMTV-R26<sup>Met</sup></i> | Tumour                | carcinoma                  | 2-3   | +        | 2              | 0                  | +   | _               | Yes (T20)      |
| 672 941              | <i>MMTV-R26<sup>Met</sup></i> | Tumour                | carcinoma                  | 3     | _        | 2              | 0                  | +   | _               | Yes (T23)      |

|                      |                               |        |           |    |    |    |    |    |    |   |           |
|----------------------|-------------------------------|--------|-----------|----|----|----|----|----|----|---|-----------|
| 672 876              | <i>MMTV-R26<sup>Met</sup></i> | Tumour | nd        | nd | nd | nd | nd | nd | nd | – | Yes (T21) |
| 672 302              | <i>MMTV-R26<sup>Met</sup></i> | Tumour | nd        | nd | nd | nd | nd | nd | nd | – | Yes (T22) |
| 672 870              | <i>MMTV-R26<sup>Met</sup></i> | Tumour | nd        | nd | nd | nd | nd | nd | nd | – | Yes (T24) |
| 671 509              | <i>MMTV-R26<sup>Met</sup></i> | Tumour | carcinoma | 3  | +  | 2  | 0  | +  | –  | – | –         |
| 671 802<br>(Tumor B) | <i>MMTV-R26<sup>Met</sup></i> | Tumour | carcinoma | 3  | –  | 1  | 0  | +  | –  | – | –         |
| 672 802              | <i>MMTV-R26<sup>Met</sup></i> | Tumour | carcinoma | 3  | +  | 2  | 0  | +  | –  | – | –         |
| 669 527              | <i>MMTV-R26<sup>Met</sup></i> | Tumour | carcinoma | nd | nd | nd | nd | nd | nd | – | –         |
| 669 355              | <i>MMTV-R26<sup>Met</sup></i> | Tumour | carcinoma | nd | nd | nd | nd | nd | nd | – | –         |
| 669 717              | <i>MMTV-R26<sup>Met</sup></i> | Tumour | carcinoma | nd | nd | nd | nd | nd | nd | – | –         |
| 669 854              | <i>MMTV-R26<sup>Met</sup></i> | Tumour | carcinoma | nd | nd | nd | nd | nd | nd | – | –         |
| 671 720              | <i>MMTV-R26<sup>Met</sup></i> | Tumour | nd        | nd | nd | nd | nd | nd | nd | – | –         |
| 672 246              | <i>MMTV-R26<sup>Met</sup></i> | Tumour | nd        | nd | nd | nd | nd | nd | nd | – | –         |
| 671 594              | <i>MMTV</i>                   | Normal | –         | nd | –  | nd | nd | –  | –  | – | Yes (N1)  |
| 671 600              | <i>MMTV</i>                   | Normal | –         | nd | –  | nd | nd | –  | –  | – | Yes (N2)  |
| 672 603              | <i>MMTV-R26<sup>Met</sup></i> | Normal | –         | nd | –  | nd | nd | nd | –  | – | Yes (N3)  |

**Table S2:** Antibodies used for RPPA analysis of *MMTV-R26<sup>Met</sup>* tumors and cells

| #  | Official Ab Name                     | Ab Name Reported on Dataset | Gene Name  | Company             | Catalog #           | Species | RPPA Dilution |
|----|--------------------------------------|-----------------------------|------------|---------------------|---------------------|---------|---------------|
| 1  | 14-3-3 beta                          | 14-3-3-beta                 | YWHAB      | Santa Cruz          | sc-628              | Rabbit  | 1:75          |
| 2  | 14-3-3 epsilon                       | 14-3-3-epsilon              | YWHAE      | Santa Cruz          | SC-23957            | Mouse   | 1:50          |
| 3  | 14-3-3 zeta                          | 14-3-3-zeta                 | YWHAZ      | Santa Cruz          | sc-1019             | Rabbit  | 1:5000        |
| 4  | 4E-BP1                               | 4E-BP1                      | EIF4EBP1   | CST                 | 9452                | Rabbit  | 1:100         |
| 5  | 4E-BP1 (phospho S65)                 | 4E-BP1_pS65                 | EIF4EBP1   | CST                 | 9456                | Rabbit  | 1:250         |
| 6  | 4E-BP1 (phospho T37/46)              | 4E-BP1-pT37-T46             | EIF4EBP1   | CST                 | 9459                | Rabbit  | 1:2000        |
| 7  | 53BP1                                | 53BP1                       | TP53BP1    | CST                 | 4937                | Rabbit  | 1:300         |
| 8  | A1Up                                 | UBQLN4                      | UBQLN4     | Santa Cruz          | sc-136145           | Mouse   | 1:125         |
| 9  | Acetyl-CoA-Carboxylase               | ACC1                        | ACACA, B   | Epitomics/<br>Abcam | 1768-1/<br>ab45174  | Rabbit  | 1:1500        |
| 10 | Acetyl-CoA-Carboxylase (phospho S79) | ACC_pS79                    | ACACA, B   | CST                 | 3661                | Rabbit  | 1:500         |
| 11 | ACSL1 (D2H5)                         | ACSL1                       | ACSL1      | CST                 | 9189                | Rabbit  | 1:500         |
| 12 | ACVRL1                               | ACVRL1                      | ACVRL1     | Epitomics/<br>Abcam | 2940-1/<br>ab108207 | Rabbit  | 1:30          |
| 13 | ADAR1                                | ADAR1                       | ADAR       | Abcam               | ab88574             | Mouse   | 1:100         |
| 14 | Akt                                  | Akt                         | AKT1, 2, 3 | CST                 | 4691                | Rabbit  | 1:7500        |
| 15 | Akt (phospho S473)                   | Akt_pS473                   | AKT1, 2, 3 | CST                 | 9271                | Rabbit  | 1:150         |
| 16 | Akt (phospho T308)                   | Akt_pT308                   | AKT1, 2, 3 | CST                 | 2965                | Rabbit  | 1:250         |
| 17 | Akt1                                 | Akt1                        | AKT1       | CST                 | 2938                | Rabbit  | 1:1000        |
| 18 | Akt1 (phospho S473)                  | Akt1_pS473                  | AKT1       | CST                 | 9018                | Rabbit  | 1:1000        |
| 19 | Akt2                                 | Akt2                        | AKT2       | CST                 | 3063                | Rabbit  | 1:3000        |
| 20 | Akt2 (phospho S474)                  | Akt2_pS474                  | AKT2       | CST                 | 8599                | Rabbit  | 1:1000        |
| 21 | Ambra1 (phospho S52)                 | Ambra1_pS52                 | AMBRA1     | Millipore           | ABC80               | Rabbit  | 1:250         |
| 22 | AMPK alpha 2 (phospho S345)          | AMPK-a2_pS345               | PRKAA1, 2  | Abcam               | ab129081            | Rabbit  | 1:200         |
| 23 | AMPKa                                | AMPKa                       | PRKAA1, 2  | CST                 | 2532                | Rabbit  | 1:75          |

|    |                              |             |           |                     |                    |        |        |
|----|------------------------------|-------------|-----------|---------------------|--------------------|--------|--------|
| 24 | AMPKa<br>(phospho T172)      | AMPKa_pT172 | PRKAA1, 2 | CST                 | 2535               | Rabbit | 1:100  |
| 25 | Androgen<br>Receptor (D6F11) | AR          | AR        | CST                 | 5153               | Rabbit | 1:250  |
| 26 | Annexin I                    | Annexin-I   | ANXA1     | BD<br>Biosciences   | 610066             | Mouse  | 1:5000 |
| 27 | Annexin VII                  | Annexin-VII | ANXA7     | BD<br>Biosciences   | 610668             | Mouse  | 1:20   |
| 28 | A-Raf                        | A-Raf       | ARAF      | CST                 | 4432               | Rabbit | 1:200  |
| 29 | A-Raf<br>(phospho S299)      | A-Raf_pS299 | ARAF      | CST                 | 4431               | Rabbit | 1:25   |
| 30 | ARID1A                       | ARID1A      | ARID1A    | Sigma-Aldrich       | HPA005456          | Rabbit | 1:1000 |
| 31 | ASNS                         | ASNS        | ASNS      | Sigma-Aldrich       | HPA029318          | Rabbit | 1:500  |
| 32 | Atg3                         | Atg3        | ATG3      | CST                 | 3415               | Rabbit | 1:72   |
| 33 | Atg4B                        | Atg4B       | ATG4B     | CST                 | 13507              | Rabbit | 1:200  |
| 34 | Atg5                         | Atg5        | ATG5      | CST                 | 12994              | Rabbit | 1:1000 |
| 35 | Atg7                         | Atg7        | ATG7      | CST                 | 8558               | Rabbit | 1:1000 |
| 36 | ATM                          | ATM         | ATM       | CST                 | 2873               | Rabbit | 1:250  |
| 37 | ATM<br>(phospho S1981)       | ATM_pS1981  | ATM       | CST                 | 5883               | Rabbit | 1:20   |
| 38 | ATP5A                        | ATP5A       | ATP5A     | Abcam               | ab14748            | Mouse  | 1:500  |
| 39 | ATP5H                        | ATP5H       | ATP5H     | Abcam               | ab110275           | Mouse  | 1:30   |
| 40 | ATR                          | ATR         | ATR       | CST                 | 2790               | Rabbit | 1:30   |
| 41 | ATR<br>(phospho S428)        | ATR_pS428   | ATR       | Abcam               | ab178407           | Rabbit | 1:1000 |
| 42 | ATRX                         | ATRX        | ATRX      | Abcam               | ab97508            | Rabbit | 1:300  |
| 43 | Aurora B/AIM1                | Aurora-B    | AURKB     | CST                 | 3094               | Rabbit | 1:38   |
| 44 | Axl                          | Axl         | AXL       | CST                 | 8661               | Rabbit | 1:500  |
| 45 | B7-H3                        | B7-H3       | CD276     | CST                 | 14058              | Rabbit | 1:200  |
| 46 | B7-H4                        | B7-H4       | VTCN1     | CST                 | 14572              | Rabbit | 1:50   |
| 47 | Bad<br>(phospho S112)        | Bad_pS112   | BAD       | CST                 | 9291               | Rabbit | 1:50   |
| 48 | Bak                          | Bak         | BAK1      | Epitomics/<br>Abcam | 1542-1/<br>ab32371 | Rabbit | 1:400  |
| 49 | BAP1                         | BAP1        | BAP1      | Santa Cruz          | sc-28383           | Mouse  | 1:200  |
| 50 | Bax                          | Bax         | BAX       | CST                 | 2772               | Rabbit | 1:100  |
| 51 | b-Catenin                    | b-Catenin   | CTNNB1    | CST                 | 9562               | Rabbit | 1:1500 |
| 52 | Bcl2                         | Bcl2        | BCL2      | Dako                | M0887              | Mouse  | 1:50   |
| 53 | Bcl2A1                       | Bcl2A1      | BCL2A1    | Abnova              | PAB8528            | Rabbit | 1:250  |
| 54 | Bcl-xL                       | Bcl-xL      | BCL2L1    | CST                 | 2762               | Rabbit | 1:100  |

|    |                                |                          |         |                     |                    |        |        |
|----|--------------------------------|--------------------------|---------|---------------------|--------------------|--------|--------|
| 55 | Beclin 1                       | Beclin                   | BECN1   | ThermoFisher        | PA1-16857          | Rabbit | 1:500  |
| 56 | beta Actin                     | b-Actin                  | ACTB    | CST                 | 4970               | Rabbit | 1:50   |
| 57 | beta Catenin (phospho T41/S45) | b-Catenin_pT41_S45       | CTNNB1  | CST                 | 9565               | Rabbit | 1:30   |
| 58 | Bid                            | Bid                      | BID     | CST                 | 2002               | Rabbit | 1:500  |
| 59 | Bim (C34C5)                    | Bim                      | BCL2L11 | Epitomics/<br>Abcam | 1036-1/<br>ab32158 | Rabbit | 1:400  |
| 60 | BiP/GRP78                      | BiP-GRP78                | HSPA5   | BD<br>Biosciences   | 610978             | Mouse  | 1:150  |
| 61 | BMK1/Erk5 (phospho T218/Y220)  | BMK1-<br>Erk5_pT218_Y220 | MAPK7   | Millipore           | 07-507             | Rabbit | 1:500  |
| 62 | B-Raf                          | B-Raf                    | BRAF    | CST                 | 14814              | Rabbit | 1:500  |
| 63 | B-Raf (phospho S445)           | B-Raf_pS445              | BRAF    | CST                 | 2696               | Rabbit | 1:75   |
| 64 | BRD4                           | BRD4                     | BRD4    | CST                 | 13440              | Rabbit | 1:1000 |
| 65 | CA9 (CAIX)                     | CA9                      | CA9     | CST                 | 5649               | Rabbit | 1:200  |
| 66 | c-Abl                          | c-Abl                    | ABL1    | CST                 | 2862               | Rabbit | 1:100  |
| 67 | c-Abl (phospho Y412)           | Abl_pY412                | ABL1    | CST                 | 2865               | Rabbit | 1:200  |
| 68 | Caspase 3 (cleaved asp175)     | Caspase-3-cleaved        | CASP3   | CST                 | 9661               | Rabbit | 1:500  |
| 69 | Caspase 7 (cleaved)            | Caspase-7-cleaved        | CASP7   | CST                 | 9491               | Rabbit | 1:60   |
| 70 | Caspase 8                      | Caspase-8                | CASP8   | CST                 | 9746               | Mouse  | 1:150  |
| 71 | Caspase 8 (cleaved asp391)     | Caspase-8-cleaved        | CASP8   | CST                 | 9496               | Rabbit | 1:500  |
| 72 | Caspase-3                      | Caspase-3                | CASP3   | Epitomics/<br>Abcam | 1476-1/<br>ab32042 | Rabbit | 1:250  |
| 73 | Caveolin 1                     | Caveolin-1               | CAV1    | CST                 | 3238               | Rabbit | 1:3000 |
| 74 | CD134/OX40                     | CD134                    | TNFRSF  | Abcam               | ab76000            | Rabbit | 1:100  |
| 75 | CD171 (L1)                     | CD171                    | L1CAM   | Biologend           | 826701             | Mouse  | 1:1000 |
| 76 | CD20                           | CD20                     | MS4A1   | Epitomics/<br>Abcam | 1632-1/<br>ab78237 | Rabbit | 1:75   |
| 77 | CD26                           | CD26                     | DPP4    | Abcam               | ab28340            | Rabbit | 1:1000 |
| 78 | CD29                           | CD29                     | ITGB1   | BD<br>Biosciences   | 610467             | Mouse  | 1:30   |
| 79 | CD31                           | CD31                     | PECAM1  | Dako/<br>Fisher     | M0823/<br>MS353S   | Mouse  | 1:25   |
| 80 | CD38                           | CD38                     | CD38    | Abcam               | ab108403           | Rabbit | 1:250  |
| 81 | CD4                            | CD4                      | CD4     | Abcam               | ab133616           | Rabbit | 1:500  |

|     |                           |                        |            |                       |                      |        |        |
|-----|---------------------------|------------------------|------------|-----------------------|----------------------|--------|--------|
| 82  | CD44                      | CD44                   | CD44       | CST                   | 3570                 | Mouse  | 1:20   |
| 83  | CD45                      | CD45                   | CD45       | DAKO/<br>ThermoFisher | M070129-2/<br>MS355P | Mouse  | 1:1000 |
| 84  | CD49b                     | CD49b                  | ITGA2      | BD<br>Biosciences     | 611016               | Mouse  | 1:50   |
| 85  | CD86                      | CD86                   | CD86       | Abcam                 | ab53004              | Rabbit |        |
| 86  | Cdc2 (phospho<br>Y15)     | cdc2_pY15              | CDK        | CST                   | 4539                 | Rabbit | 1:38   |
| 87  | cdc25C                    | cdc25C                 | CDC25C     | CST                   | 4688                 | Rabbit | 1:250  |
| 88  | CDK1/2/3<br>(phospho T14) | CDK1_pT14              | CDK1, 2, 3 | Abcam                 | ab32384              | Rabbit | 1:1000 |
| 89  | CDKN2A/p16INK4<br>a       | p16INK4a               | CDKN2A     | Abcam                 | ab81278              | Rabbit | 1:500  |
| 90  | Chk1                      | Chk1                   | CHEK       | CST                   | 2360                 | Mouse  | 1:100  |
| 91  | Chk1 (phospho<br>S296)    | Chk1_pS296             | CHEK1      | Abcam                 | ab79758              | Rabbit | 1:125  |
| 92  | Chk1 (phospho<br>S345)    | Chk1_pS345             | CHEK1      | CST                   | 2348                 | Rabbit | 1:30   |
| 93  | Chk2                      | Chk2                   | CHEK2      | CST                   | 3440                 | Mouse  | 1:50   |
| 94  | Chk2 (phospho<br>T68)     | Chk2_pT68              | CHEK2      | CST                   | 2197                 | Rabbit | 1:250  |
| 95  | c-IAP2                    | c-IAP2                 | BIRC3      | CST                   | 3130                 | Rabbit | 1:50   |
| 96  | CIITA                     | CIITA                  | CIITA      | CST                   | 3793                 | Rabbit | 1:250  |
| 97  | c-Jun (phospho<br>S73)    | c-Jun_pS73             | JUN        | CST                   | 9164                 | Rabbit | 1:30   |
| 98  | c-Kit                     | c-Kit                  | KIT        | Epitomics/<br>Abcam   | 1522-1/<br>ab32363   | Rabbit | 1:250  |
| 99  | Claudin 7                 | Claudin-7              | CLDN7      | Abcam                 | ab79481              | Rabbit | 1:250  |
| 100 | c-Myc                     | c-Myc                  | MYC        | Santa Cruz            | sc-764               | Rabbit | 1:250  |
| 101 | COG3                      | COG3                   | COG3       | ProteinTech           | 11130-1-AP           | Rabbit | 1:750  |
| 102 | Collagen-<br>VI/COL6A1    | Collagen-VI            | COL6A1     | Santa Cruz            | sc-20649             | Rabbit | 1:6000 |
| 103 | Complex II<br>Subunit     | Complex-II-<br>Subunit | SDHB       | Life<br>Technologies  | 459230               | Mouse  | 1:200  |
| 104 | Connexin 43               | Connexin-43            | GJA1       | CST                   | 3512                 | Rabbit | 1:150  |
| 105 | Coup-TFII                 | Coup-TFII              | NR2F2      | CST                   | 6434                 | Rabbit | 1:50   |
| 106 | Cox2                      | Cox2                   | PTGS2      | CST                   | 4842                 | Rabbit | 1:75   |
| 107 | Cox-IV                    | Cox-IV                 | COX4I1     | CST                   | 4850                 | Rabbit | 1:5000 |
| 108 | C-Raf                     | C-Raf                  | RAF1       | Millipore             | 04-739               | Rabbit | 1:100  |
| 109 | C-Raf (phospho<br>S338)   | C-Raf_pS338            | RAF1       | CST                   | 9427                 | Rabbit | 1:200  |

|     |                                          |                  |                   |                     |                    |        |         |
|-----|------------------------------------------|------------------|-------------------|---------------------|--------------------|--------|---------|
| 110 | Creb                                     | Creb             | CREB1             | CST                 | 9197               | Rabbit | 1:75    |
| 111 | CSK                                      | CSK              | CSK               | CST                 | 4980               | Rabbit | 1:300   |
| 112 | CtIP                                     | CtIP             | RBBP8             | CST                 | 9201               | Rabbit | 1:500   |
| 113 | Cyclin B1                                | Cyclin B1        | CCNB1             | Epitomics/<br>Abcam | 1495-1/<br>ab32053 | Rabbit | 1:1500  |
| 114 | Cyclin D1                                | Cyclin-D1        | CCND1             | Millipore<br>Sigma  | SAB4502603         | Rabbit | 1:200   |
| 115 | Cyclin D3                                | Cyclin D3        | CCND3             | CST                 | 2936               | Mouse  | 1:1000  |
| 116 | Cyclin E1                                | Cyclin E1        | CCNE1             | Santa Cruz          | sc-247             | Mouse  | 1:25    |
| 117 | Cyclophilin-F                            | Cyclophilin-F    | PPIF              | Abcam               | MSA04/<br>ab110324 | Mouse  | 1:50000 |
| 118 | Cytokeratin 19                           | Cytokeratin-19   | KRT19             | Dako                | M0888              | Mouse  | 1:50    |
| 119 | DAP Kinase 1<br>(phospho S308)           | DAPK1_pS308      | DAPK1             | GeneTex             | GTX10524           | Mouse  | 1:200   |
| 120 | DAP Kinase 2                             | DAPK2            | DAPK2             | Abcam               | ab51601            | Rabbit | 1:250   |
| 121 | DDB-1                                    | DDB-1            | DDB1              | CST                 | 6998               | Rabbit | 1:5000  |
| 122 | Detyrosinated<br>alpha-Tubulin           | D-a-Tubulin      | TUBA4A,<br>TUBA3C | Abcam               | ab48389            | Rabbit | 1:1500  |
| 123 | Di-Methyl-<br>Histone H3<br>(Lys4/C64G9) | DM-Histone-H3    | HIST1H3A          | CST                 | 9725               | Rabbit | 1:100   |
| 124 | Dimethyl-K9<br>Histone H3                | DM-K9-Histone-H3 | HIST3H3           | Abcam               | ab1220             | Mouse  | 1:250   |
| 125 | DNA Ligase IV                            | DNA-Ligase-IV    | LIG4              | CST                 | 14649              | Rabbit | 1:1000  |
| 126 | DNA Polymerase<br>gamma (D1Y6R)          | POLG             | POLG              | CST                 | 13609              | Rabbit | 1:500   |
| 127 | DNMT1 (D63A6)                            | DNMT1            | DNMT1             | CST                 | 5032               | Rabbit | 1:500   |
| 128 | DRP1 (D8H5)                              | DRP1             | DNM1L             | CST                 | 5391               | Rabbit | 1:1000  |
| 129 | DUSP4/MKP2                               | DUSP4            | DUSP4             | CST                 | 5149               | Rabbit | 1:150   |
| 130 | DUSP6                                    | DUSP6            | DUSP6             | Abcam               | ab76310            | Rabbit | 1:750   |
| 131 | Dvl3                                     | Dvl3             | DVL3              | CST                 | 3218               | Rabbit | 1:30    |
| 132 | E2F1                                     | E2F1             | E2F1              | Santa Cruz          | sc-251             | Mouse  | 1:20    |
| 133 | E-Cadherin                               | E-Cadherin       | CDH1              | CST                 | 3195               | Rabbit | 1:150   |
| 134 | eEF2                                     | eEF2             | EEF2              | CST                 | 2332               | Rabbit | 1:50    |
| 135 | eEF2K                                    | eEF2K            | EEF2K             | CST                 | 3692               | Rabbit | 1:50    |
| 136 | EGFR                                     | EGFR             | EGFR              | CST                 | 2232               | Rabbit | 1:75    |
| 137 | EGFR (phospho<br>Y1173)                  | EGFR_pY1173      | EGFR              | Epitomics/<br>Abcam | 1124-1/<br>ab32578 | Rabbit | 1:300   |
| 138 | eIF4E                                    | eIF4E            | EIF4E             | CST                 | 9742               | Rabbit | 1:75    |
| 139 | eIF4E (phospho<br>S209)                  | eIF4E_pS209      | EIF4E             | Abcam               | ab76256            | Rabbit | 1:250   |

|     |                                        |                   |        |                  |                     |        |         |
|-----|----------------------------------------|-------------------|--------|------------------|---------------------|--------|---------|
| 140 | eIF4G                                  | eIF4G             | EIF4G1 | CST              | 2498                | Rabbit | 1:1000  |
| 141 | Elk1 (phospho S383)                    | Elk1_pS383        | ELK1   | CST              | 9181                | Rabbit | 1:50    |
| 142 | Enolase-2 (D20H2)                      | Enolase-2         | ENO2   | CST              | 8171                | Rabbit | 1:250   |
| 143 | ENY2                                   | ENY2              | ENY2   | GeneTex          | GTX629542           | Mouse  | 1:500   |
| 144 | Eph Receptor A2                        | EPHA2             | EPHA2  | Abcam            | ab133501            | Rabbit | 1:1000  |
| 145 | Epithelial Membrane Antigen            | EMA               | MUC1   | DAKO             | M061329-2           | Mouse  | 1:750   |
| 146 | ErbB3/HER3                             | HER3              | ERBB3  | Santa Cruz       | sc-285              | Rabbit | 1:300   |
| 147 | ErbB3/HER3 (phospho Y1289)             | HER3_pY1289       | ERBB3  | CST              | 4791                | Rabbit | 1:50    |
| 148 | ERCC1                                  | ERCC1             | ERCC1  | Santa Cruz       | sc-17809            | Mouse  | 1:38    |
| 149 | Erk5                                   | Erk5              | MAPK7  | CST              | 3552                | Rabbit | 1:500   |
| 150 | ERRalpha (E1G1J)                       | ERRalpha          | ESRRA  | CST              | 13826               | Rabbit | 1:500   |
| 151 | ERRFI1/MIG6                            | MIG6              | ERRFI1 | Sigma-Aldrich    | WH0054206 M1        | Mouse  | 1:50    |
| 152 | Estrogen Receptor                      | ER                | ESR1   | Lab Vision       | RM-9101             | Rabbit | 1:40    |
| 153 | Estrogen Receptor alpha                | ER-a              | ERSA   | CST              | 13258               | Rabbit | 1:500   |
| 154 | Estrogen Receptor alpha (phospho S118) | ER-a_pS118        | ESR1   | Epitomics/ Abcam | 1091-1/ ab32396     | Rabbit | 1:500   |
| 155 | Ets-1                                  | Ets-1             | ETS1   | Bethyl           | A303-501A           | Rabbit | 1:100   |
| 156 | FAK                                    | FAK               | PTK2   | Epitomics/ Abcam | 1700-1/ ab40794     | Rabbit | 1:1000  |
| 157 | FAK (phospho Y397)                     | FAK_pY397         | PTK2   | CST              | 3283                | Rabbit | 1:25    |
| 158 | Fatty Acid Synthase                    | FASN              | FASN   | CST              | 3180                | Rabbit | 1:1000  |
| 159 | FGF-basic                              | FGF-basic         | FGF2   | VWR              | 10775-082 (500-P18) | Rabbit | 1:1000  |
| 160 | Fibronectin                            | Fibronectin       | FN1    | Epitomics        | 1574-1              | Rabbit | 1:10000 |
| 161 | FoxM1                                  | FOXO1             | FOXO1  | CST              | 5436                | Rabbit | 1:30    |
| 162 | FoxO3a                                 | FoxO3a            | FOXO3  | CST              | 2497                | Rabbit | 1:20    |
| 163 | FoxO3a (phospho S318/S321)             | FoxO3a_pS318_S321 | FOXO3  | CST              | 9465                | Rabbit | 1:30    |
| 164 | FRS2-a (phospho Y196)                  | FRS2-a_pY196      | FRS2   | CST              | 3864                | Rabbit | 1:100   |
| 165 | G6PD                                   | G6PD              | G6PD   | Santa Cruz       | sc-373887           | Mouse  | 1:75    |



|     |                                         |                  |          |                             |            |        |         |
|-----|-----------------------------------------|------------------|----------|-----------------------------|------------|--------|---------|
| 166 | Gab2                                    | Gab2             | GAB2     | CST                         | 3239       | Rabbit | 1:300   |
| 167 | GAPDH                                   | GAPDH            | GAPDH    | Ambion/<br>Invitrogen       | AM4300     | Mouse  | 1:75000 |
| 168 | GATA3                                   | GATA3            | GATA3    | BD<br>Biosciences           | 558686     | Mouse  | 1:150   |
| 169 | GATA6                                   | GATA6            | GATA6    | CST                         | 5851       | Rabbit | 1:200   |
| 170 | GCLC                                    | GCLC             | GCLC     | Proteintech<br>Group        | 12601-1-AP | Rabbit | 1:500   |
| 171 | GCLM                                    | GCLM             | GCLM     | Abcam                       | ab124827   | Rabbit | 1:500   |
| 172 | GCN5L2                                  | GCN5L2           | KAT2A    | CST                         | 3305       | Rabbit | 1:30    |
| 173 | Gli1                                    | Gli1             | GLI1     | CST                         | 3538       | Rabbit | 1:3000  |
| 174 | Gli3                                    | Gli3             | GLI3     | Abcam                       | ab69838    | Rabbit | 1:1000  |
| 175 | Glucose-6<br>Phosphate<br>Dehydrogenase | G6PD             | G6PD     | CST                         | 8866       | Rabbit | 1:30    |
| 176 | Glutamate<br>Dehydrogenase1/<br>2       | Glutamate-D1-2   | GLUD1    | Novus                       | NBP2-16679 | Rabbit | 1:500   |
| 177 | Glutaminase                             | Glutaminase      | GLS      | Abcam                       | ab156876   | Rabbit | 1:150   |
| 178 | Glycogen<br>Synthase                    | Gys              | GYS1     | CST                         | 3886       | Rabbit | 1:2000  |
| 179 | Glycogen<br>Synthase<br>(phospho S641)  | Gys_pS641        | GYS1     | CST                         | 3891       | Rabbit | 1:300   |
| 180 | GPBB                                    | GPBB             | PYGM     | Novus                       | NBP1-32799 | Rabbit | 1:200   |
| 181 | Granzyme B                              | Granzyme-B       | GZMB     | CST                         | 4275       | Rabbit | 1:500   |
| 182 | GRB7                                    | GRB7             | GRB7     | Abcam                       | ab183737   | Rabbit | 1:500   |
| 183 | Grp75 (D13H4)                           | Grp75            | HSPA9    | CST                         | 3593       | Rabbit | 1:250   |
| 184 | GSK-3alpha/beta                         | GSK-3a-b         | GSK3A, B | Santa Cruz                  | sc-7291    | Mouse  | 1:750   |
| 185 | GSK-3alpha/beta<br>(phospho S21/S9)     | GSK-3a-b_pS21_S9 | GSK3A, B | CST                         | 9331       | Rabbit | 1:200   |
| 186 | GSK-3B                                  | GSK-3B           | GSK3B    | CST                         | 9315       | Rabbit | 1:750   |
| 187 | GSK-3beta<br>(phospho S9)               | GSK-3b_pS9       | GSK3B    | CST                         | 5558       | Rabbit | 1:250   |
| 188 | H2AX (phospho<br>S140)                  | H2AX_pS140       | H2AFX    | Pierce<br>Biotechnolog<br>y | MA12022    | Mouse  | 1:100   |
| 189 | Hamartin/TSC1                           | TSC1             | TSC1     | CST                         | 4906       | Rabbit | 1:200   |
| 190 | HER2                                    | HER2             | ERBB2    | Lab Vision                  | MS-325-P1  | Mouse  | 1:300   |
| 191 | HER2 (phospho<br>Y1248)                 | HER2_pY1248      | ERBB2    | R&D systems                 | AF1768     | Rabbit | 1:1500  |
| 192 | Heregulin                               | Heregulin        | NRG1     | CST                         | 2573       | Rabbit | 01:30   |

|     |                             |                    |             |                |            |        |        |
|-----|-----------------------------|--------------------|-------------|----------------|------------|--------|--------|
| 193 | HES1                        | HES1               | HES1        | CST            | 11988      | Rabbit | 1:500  |
| 194 | Hexokinase II               | Hexokinase II      | HK2         | CST            | 2106       | Rabbit | 1:100  |
| 195 | Hif-1-alpha                 | Hif-1-alpha        | HIF1A       | BD Biosciences | 610958     | Mouse  | 1:20   |
| 196 | Histone H3                  | Histone H3         | HIST3H3     | Abcam          | ab1791     | Rabbit | 1:5000 |
| 197 | HLA-DQA1                    | HLA-DQA1           | HLA-DQA1    | Abcam          | ab128959   | Rabbit | 1:3000 |
| 198 | HLA-DR/DP/DQ/DX             | HLA-DR-DP-DQ-DX    | HLA-DRA     | Santa Cruz     | sc-53302   | Mouse  | 1:250  |
| 199 | HMHA1                       | HMHA1              | HMHA1       | ProteinTech    | 14832-1-AP | Rabbit | 1:3000 |
| 200 | HSP27                       | HSP27              | HSBP1       | CST            | 2402       | Mouse  | 1:75   |
| 201 | HSP27 (phospho S82)         | HSP27_pS82         | HSBP1       | CST            | 2401       | Rabbit | 1:75   |
| 202 | HSP60                       | HSP60              | HSP60       | CST            | 12165      | Rabbit | 1:1000 |
| 203 | HSP70                       | HSP70              | HSPA1A      | CST            | 4872       | Rabbit | 1:50   |
| 204 | Hsp75/TRAP1                 | TRAP1              | TRAP1       | BD Biosciences | 612344     | Mouse  | 1:750  |
| 205 | IDO                         | IDO                | IDO1        | CST            | 86630      | Rabbit | 1:200  |
| 206 | IGF1R (phospho Y1135/Y1136) | IGF1R_pY1135_Y1136 | IGF1R, INSR | CST            | 3024       | Rabbit | 1:30   |
| 207 | IGF-1Receptor beta          | IGF1R-b            | IGF1R       | CST            | 3018       | Rabbit | 1:50   |
| 208 | IGFBP2                      | IGFBP2             | IGFBP2      | CST            | 3922       | Rabbit | 1:50   |
| 209 | IGFBP3                      | IGFBP3             | IGFBP3      | BD Biosciences | 611504     | Mouse  | 1:1000 |
| 210 | IGFRb                       | IGFRb              | IGF1R       | CST            | 3027       | Rabbit | 1:250  |
| 211 | IL-6                        | IL-6               | IL6         | CST            | 12153      | Rabbit | 1:250  |
| 212 | INPP4b                      | INPP4b             | INPP4B      | CST            | 4039       | Rabbit | 01:30  |
| 213 | Insulin Receptor beta       | IR-b               | INSR        | CST            | 3025       | Rabbit | 1:100  |
| 214 | IRF-1                       | IRF-1              | IRF1        | CST            | 8478       | Rabbit | 1:250  |
| 215 | IRS1                        | IRS1               | IRS1        | Millipore      | 06-248     | Rabbit | 1:250  |
| 216 | IRS2                        | IRS2               | IRS2        | CST            | 4502       | Rabbit | 1:100  |
| 217 | JAB1                        | JAB1               | COPS5       | Santa Cruz     | sc-13157   | Mouse  | 1:30   |
| 218 | Jagged1                     | Jagged1            | JAG1        | Abcam          | ab109536   | Rabbit | 01:50  |
| 219 | Jak2                        | Jak2               | JAK2        | CST            | 3230       | Rabbit | 1:750  |
| 220 | JNK (phospho T183/Y185)     | JNK_pT183_Y185     | MAPK8       | CST            | 4668       | Rabbit | 01:30  |
| 221 | JNK2                        | JNK2               | MAPK9       | CST            | 4672       | Rabbit | 1:25   |
| 222 | KAP1                        | KAP1               | TRIM28      | Abcam          | ab10484    | Rabbit | 1:2000 |
| 223 | KMT3A/HYPB/HIF-1            | SETD2              | SETD2       | abcam          | ab184190   | Rabbit | 1:1000 |

|            |                                         |                      |                |                     |                    |        |        |
|------------|-----------------------------------------|----------------------|----------------|---------------------|--------------------|--------|--------|
| <b>224</b> | LAD1                                    | LAD1                 | LAD1           | Atlas               | HPA028732          | Rabbit | 1:500  |
| <b>225</b> | Lasu1/Ureb1                             | Lasu1                | HUWE1          | Bethyl              | IHC-00439          | Rabbit | 1:1000 |
| <b>226</b> | LC3A/B                                  | LC3A-B               | MAP1LC3A,<br>B | CST                 | 4108               | Rabbit | 1:250  |
| <b>227</b> | Lck                                     | Lck                  | LCK            | CST                 | 2752               | Rabbit | 1:75   |
| <b>228</b> | LDHA                                    | LDHA                 | LDHA           | CST                 | 3582               | Rabbit | 1:250  |
| <b>229</b> | LRP6 (phospho<br>S1490)                 | LRP6_pS1490          | LRP6           | CST                 | 2568               | Rabbit | 1:250  |
| <b>230</b> | MAPK (phospho<br>T202/Y204)             | MAPK_pT202/Y20<br>4  | MAPK1, 3       | CST                 | 4377               | Rabbit | 1:25   |
| <b>231</b> | Mcl-1                                   | Mcl-1                | MCL1           | CST                 | 5453               | Rabbit | 1:100  |
| <b>232</b> | MDM2 (phospho<br>S166)                  | MDM2_pS166           | MDM2           | CST                 | 3521               | Rabbit | 1:60   |
| <b>233</b> | MEK1                                    | MEK1                 | MAP2K1         | Epitomics/<br>Abcam | 1235-1/<br>ab32576 | Rabbit | 1:1500 |
| <b>234</b> | MEK1 (phospho<br>S217/S221)             | MEK1_p_S217/<br>S221 | MAP2K1, 2      | CST                 | 9154               | Rabbit | 1:50   |
| <b>235</b> | MEK2                                    | MEK2                 | MAP2K2         | CST                 | 9125               | Rabbit | 1:50   |
| <b>236</b> | MelanA                                  | MelanA               | MLANA          | Abcam               | ab51061            | Rabbit | 1:500  |
| <b>237</b> | Melanoma gp100                          | Melan-gp100          | PMEL           | Abcam               | ab137078           | Rabbit | 1:500  |
| <b>238</b> | MERIT40                                 | MERIT40              | MERIT40        | CST                 | 12711              | Rabbit | 1:3000 |
| <b>239</b> | MERIT40<br>(phospho S29)                | MERIT40_pS29         | BABAM1         | CST                 | 12110              | Rabbit | 1:300  |
| <b>240</b> | Merlin/NF2                              | Merlin               | NF2            | Novus               | 22710002           | Rabbit | 1:250  |
| <b>241</b> | MIF                                     | MIF                  | MIF            | Santa Cruz          | sc-130329          | Rabbit | 1:100  |
| <b>242</b> | MITF (D5G7V)                            | MITF                 | MITF           | CST                 | 12590              | Rabbit | 1:500  |
| <b>243</b> | Mitofusin-1                             | Mitofusin-1          | MFN1           | CST                 | 14739              | Rabbit | 1:500  |
| <b>244</b> | Mitofusin-2                             | Mitofusin-2          | MFN2           | CST                 | 11925              | Rabbit | 1:1000 |
| <b>245</b> | MLH1 (4C9C7)                            | MLH1                 | MLH1           | CST                 | 3515               | Mouse  | 1:500  |
| <b>246</b> | MLKL                                    | MLKL                 | MLKL           | CST                 | 14993              | Rabbit | 1:1000 |
| <b>247</b> | MMP2                                    | MMP2                 | MMP2           | CST                 | 4022               | Rabbit | 1:75   |
| <b>248</b> | Mnk1                                    | Mnk1                 | MKNK1          | CST                 | 2195               | Rabbit | 1:750  |
| <b>249</b> | Monocarboxylic<br>Acid Transporter<br>4 | MCT4                 | SLC16A4        | Millipore           | AB3314P            | Rabbit | 1:500  |
| <b>250</b> | MR1                                     | MR1                  | MR1            | Santa Cruz          | sc-377312          | Mouse  | 1:500  |
| <b>251</b> | MRAP                                    | MRAP                 | MRAP           | Abcam               | ab103319           | Rabbit | 1:500  |
| <b>252</b> | MSH2 (D24B5)                            | MSH2                 | MSH2           | CST                 | 2017               | Rabbit | 1:750  |
| <b>253</b> | MSH6                                    | MSH6                 | MSH6           | Novus               | 22030002           | Rabbit | 1:1000 |
| <b>254</b> | MSI2 (EP1305Y)                          | MSI2                 | MSI2           | Abcam               | ab76148            | Rabbit | 1:1000 |

|     |                            |                   |                    |                     |                     |        |         |
|-----|----------------------------|-------------------|--------------------|---------------------|---------------------|--------|---------|
| 255 | MTCO1                      | MTCO1             | MTCO1              | Abcam               | ab14705             | Mouse  | 1:500   |
| 256 | mTOR                       | mTOR              | MTOR               | CST                 | 2983                | Rabbit | 1:3000  |
| 257 | mTOR (phospho S2448)       | mTOR_pS2448       | MTOR               | CST                 | 2971                | Rabbit | 1:50    |
| 258 | MTSS1                      | MTSS1             | MTSS1              | Novus               | H00009788-M01A      | Mouse  | 1:250   |
| 259 | Myosin Heavy Chain 11      | Myosin-11         | MYH11              | Novus               | 21370002            | Rabbit | 1:1000  |
| 260 | Myosin IIa                 | Myosin-IIa        | MYH9               | CST                 | 3403                | Rabbit | 1:1000  |
| 261 | Myosin IIa (phospho S1943) | Myosin-IIa_pS1943 | MYH9               | CST                 | 5026                | Rabbit | 1:750   |
| 262 | Myt1                       | Myt1              | PKMYT1             | CST                 | 4282                | Rabbit | 1:100   |
| 263 | NAPSIN-A                   | NAPSIN-A          | NAPSA              | Epitomics/<br>Abcam | 5795-1/<br>ab129189 | Rabbit | 1:150   |
| 264 | N-Cadherin                 | N-Cadherin        | CDH2               | CST                 | 4061                | Rabbit | 1:25    |
| 265 | NDRG1 (phospho T346)       | NDRG1_pT346       | NDRG1              | CST                 | 3217                | Rabbit | 01:50   |
| 266 | NDUFB4                     | NDUFB4            | NDUFB4             | Abcam               | ab110243            | Mouse  | 1:25    |
| 267 | NF-kB p65 (phospho S536)   | NF-kB-p65_pS536   | RELA               | CST                 | 3033                | Rabbit | 1:30    |
| 268 | Notch1                     | Notch1            | NOTCH1             | CST                 | 3268                | Rabbit | 01:30   |
| 299 | Notch1 (Cleaved)           | Notch1-cleaved    | NOTCH1             | CST                 | 4147                | Rabbit | 1:100   |
| 270 | Notch3                     | Notch3            | NOTCH3             | Novus               | H00004854-M01       | Mouse  | 1:250   |
| 271 | NQO1                       | NQO1              | NQO1               | CST                 | 3187                | Mouse  | 1:15000 |
| 272 | N-Ras                      | N-Ras             | NRAS               | Santa Cruz          | sc-31               | Mouse  | 1:50    |
| 273 | NRF2                       | NRF2              | NRF2               | CST                 | 12721               | Rabbit | 1:500   |
| 274 | Oct-4                      | Oct-4             | POU5F1             | CST                 | 2750                | Rabbit | 1:40    |
| 275 | p16/INK4a                  | p16-INK4a         | CDKN2A             | Epitomics/<br>Abcam | 1712-1/<br>ab40803  | Rabbit | 1:500   |
| 276 | p21                        | p21               | CDKN1A             | Santa Cruz          | sc-6246             | Rabbit | 1:150   |
| 277 | p27 (phospho T157)         | p27_pT157         | CDKN1B             | R&D Systems         | AF1555              | Rabbit | 1:30    |
| 278 | p27 (phospho T198)         | p27_pT198         | CDKN1B             | Abcam               | ab64949             | Rabbit | 01:50   |
| 279 | p27 KIP 1                  | p27-Kip-1         | CDKN1B             | Epitomics/<br>Abcam | 1591-1/<br>ab32034  | Rabbit | 01:40   |
| 280 | p38 (phospho T180/Y182)    | p38_pT180_Y182    | MAPK11, 12, 13, 14 | CST                 | 9211                | Rabbit | 1:38    |
| 281 | p38 alpha MAPK             | p38-a             | MAPK1              | CST                 | 9228                | Mouse  | 1:300   |
| 282 | p38 MAPK                   | p38-MAPK          | MAPK11, 12, 14     | CST                 | 9212                | Rabbit | 1:1500  |

|     |                              |                     |          |                   |                 |        |         |
|-----|------------------------------|---------------------|----------|-------------------|-----------------|--------|---------|
| 283 | p38/MAPK (phospho T180/Y182) | p38-MAPK_pT180_Y182 | MAPK14   | CST               | 9215            | Rabbit | 1:250   |
| 284 | p44/42 MAPK                  | p44-42-MAPK         | MAPK1, 3 | CST               | 4695            | Rabbit | 1:2000  |
| 285 | p53                          | p53                 | TP53     | CST               | 9282            | Rabbit | 1:2500  |
| 286 | p70 S6 Kinase (phospho T389) | p70-S6K_pT389       | RPS6KB1  | CST               | 9205            | Rabbit | 1:50    |
| 287 | p70/S6K1                     | p70-S6K1            | RPS6KB1  | Epitomics/ Abcam  | 1494-1/ ab32529 | Rabbit | 1:300   |
| 288 | p90RSK (phospho T573)        | p90RSK_pT573        | RPS6K    | CST               | 9346            | Rabbit | 1:25    |
| 289 | PAI-1                        | PAI-1               | SERPINE1 | BD Biosciences    | 612024          | Mouse  | 1:50    |
| 290 | PAICS                        | PAICS               | PAICS    | Sigma-Aldrich     | HPA035895       | Rabbit | 1:250   |
| 291 | PAK1                         | PAK1                | PAK1     | CST               | 2602            | Rabbit | 1:750   |
| 292 | PAK4                         | PAK4                | PAK4     | CST               | 3242            | Rabbit | 1:300   |
| 293 | PAR                          | PAR                 | PAR      | Trevigen          | 4336-BPC-100    | Rabbit | 1:30000 |
| 294 | PARG                         | PARG                | PARG     | CST               | 66564           | Rabbit | 1:1000  |
| 295 | PARK7/DJ1                    | DJ1                 | PARK7    | Abcam             | ab76008         | Rabbit | 1:5000  |
| 296 | PARP                         | PARP                | PARP1    | CST               | 9532            | Rabbit | 1:1000  |
| 297 | Patched                      | Patched             | PTCH1    | Abcam             | ab53715         | Rabbit | 1:1000  |
| 298 | Paxillin                     | Paxillin            | PXN      | CST               | 2542            | Rabbit | 1:250   |
| 299 | P-Cadherin                   | P-Cadherin          | CDH3     | CST               | 2130            | Rabbit | 1:38    |
| 300 | PCNA                         | PCNA                | PCNA     | CST               | 2586            | Mouse  | 1:250   |
| 301 | PD-1                         | PD-1                | PDCD1    | CST               | 43248           | Mouse  | 1:500   |
| 302 | Pdcd4                        | Pdcd4               | PDCD4    | Rockland          | 600-401-965     | Rabbit | 1:750   |
| 303 | PDGFRB                       | PDGFR-b             | PDGFRB   | Invitrogen        | MA5-15143       | Rabbit | 1:500   |
| 304 | PDH                          | PDH                 | PDH      | Abcam             | ab110332        | Mouse  | 1:100   |
| 305 | PDHK1                        | PDHK1               | PDHK1    | CST               | 3820            | Rabbit | 1:300   |
| 306 | PDK1                         | PDK1                | PDPK1    | CST               | 3062            | Rabbit | 01:50   |
| 307 | PDK1 (phospho S241)          | PDK1_pS241          | PDPK1    | CST               | 3061            | Rabbit | 01:50   |
| 308 | PD-L1                        | PD-L1               | CD274    | CST               | 13684           | Rabbit | 1:250   |
| 309 | PEA-15                       | PEA-15              | PEA15    | CST               | 2780S           | Rabbit | 1:100   |
| 310 | PED/PEA-15 (phospho S116)    | PEA-15_pS116        | PEA15    | Life Technologies | 44836G          | Rabbit | 1:100   |
| 311 | PHGDH                        | PHGDH               | PHGDH    | CST               | 13428           | Rabbit | 1:1000  |
| 312 | PI3 Kinase p110 alpha        | PI3K-p110-a         | PIK3CA   | CST               | 4255            | Rabbit | 1:50    |
| 313 | PI3K p110 beta               | PI3K-p110-b         | PIK3BC   | Santa Cruz        | sc-376412       | Mouse  | 1:40    |

|            |                                      |                       |                      |                   |               |        |         |
|------------|--------------------------------------|-----------------------|----------------------|-------------------|---------------|--------|---------|
| <b>314</b> | PI3K p85                             | PI3K-p85              | PIK3R1               | Millipore         | 06-195        | Rabbit | 1:15000 |
| <b>315</b> | PKA RI alpha                         | PKA-a                 | PRKAR1A              | CST               | 5675          | Rabbit | 1:250   |
| <b>316</b> | PKC alpha/beta II (phospho T638/641) | PKC-a-b-II_pT638_T641 | PRKCA, B             | CST               | 9375          | Rabbit | 1:1000  |
| <b>317</b> | PKC(pan) beta II (phospho S660)      | PKC-b-II_pS660        | PRKCA, B, D, E, H, Q | CST               | 9371          | Rabbit | 1:200   |
| <b>318</b> | PKC delta (phospho S664)             | PKC-delta_pS664       | PRKCD                | Millipore         | 07-875        | Rabbit | 1:75    |
| <b>319</b> | PKCalpha                             | PKCa                  | PRKCA                | CST               | 2056          | Rabbit | 1:200   |
| <b>320</b> | PKM2                                 | PKM2                  | PKM                  | CST               | 4053          | Rabbit | 1:300   |
| <b>321</b> | PLC gamma2 (phospho Y759)            | PLC-gamma2_pY759      | PLCG2                | CST               | 3874          | Rabbit | 01:25   |
| <b>322</b> | PLK1                                 | PLK1                  | PLK1                 | CST               | 4513          | Rabbit | 1:125   |
| <b>323</b> | Met (phospho Y1234/Y1235)            | c-Met_pY1234_Y1235    | MET                  | CST               | 3129          | Rabbit | 1:100   |
| <b>324</b> | PMS2                                 | PMS2                  | PMS2                 | Novus Biologicals | 22510002      | Rabbit | 1:1500  |
| <b>325</b> | PRAS40                               | PRAS40                | AKT1S1               | Life Technologies | AHO1031       | Mouse  | 1:75    |
| <b>326</b> | PRAS40 (phospho T246)                | PRAS40_pT246          | AKT1S1               | Life Technologies | 441100G       | Rabbit | 1:500   |
| <b>327</b> | PREX1                                | PREX1                 | PREX1                | Abcam             | ab102739      | Rabbit | 1:100   |
| <b>328</b> | Progesterone Receptor [YR85]         | PR                    | PGR                  | abcam             | 206926        | Rabbit | 1:500   |
| <b>329</b> | PTEN                                 | PTEN                  | PTEN                 | CST               | 9552          | Rabbit | 1:500   |
| <b>330</b> | PTPN12                               | PTPN12                | PTPN12               | Abcam             | ab76942       | Rabbit | 1:500   |
| <b>331</b> | Puma                                 | Puma                  | BBC3                 | CST               | 4976          | Rabbit | 1:50    |
| <b>332</b> | PYGB                                 | PYGB                  | PYGB                 | Sigma-Aldrich     | SAB2900066    | Rabbit | 1:750   |
| <b>333</b> | PYGM                                 | PYGM                  | PYGM                 | Novus             | H00005837-M10 | Mouse  | 1:500   |
| <b>334</b> | Pyk2 (phospho Y402)                  | Pyk2_pY402            | PYK2                 | CST               | 3291          | Rabbit | 1:500   |
| <b>335</b> | Pyruvate Dehydrogenase               | PDHA1                 | PDHA1                | CST               | 3205          | Rabbit | 1:200   |
| <b>336</b> | Rab11                                | Rab11                 | RAB11A, B            | CST               | 3539          | Rabbit | 1:30    |
| <b>337</b> | Rab25                                | Rab25                 | RAB25                | CST               | 4314          | Rabbit | 1:30    |
| <b>338</b> | Rac1/Cdc42                           | Cdc42                 | CDC42                | CST               | 4651          | Rabbit | 1:100   |
| <b>339</b> | Rad23A                               | Rad23A                | RAD23A               | CST               | 24555         | Rabbit | 1:1000  |
| <b>340</b> | Rad50                                | Rad50                 | RAD50                | CST               | 3427          | Rabbit | 1:250   |
| <b>341</b> | Rad51                                | Rad51                 | RAD51                | Millipore         | ABE257        | Rabbit | 1:1000  |

|     |                        |               |               |                     |                    |        |          |
|-----|------------------------|---------------|---------------|---------------------|--------------------|--------|----------|
| 342 | Raptor                 | Raptor        | RPTOR         | CST                 | 2280               | Rabbit | 1:300    |
| 343 | Rb                     | Rb            | RB1           | CST                 | 9309               | Mouse  | 1:150    |
| 344 | Rb (phospho S807/811)  | Rb_pS807_S811 | RB1           | CST                 | 9308               | Rabbit | 1:1000   |
| 345 | RBM15                  | RBM15         | RBM15         | Novus               | 21390002           | Rabbit | 1:5000   |
| 346 | Rheb                   | Rheb          | RHEB          | R&D Systems         | MAB3426            | Mouse  | 1:75     |
| 347 | Rictor                 | Rictor        | RICTOR        | CST                 | 2114               | Rabbit | 1:100    |
| 348 | Rictor (phospho T1135) | Rictor_pT1135 | RICTOR        | CST                 | 3806               | Rabbit | 1:200    |
| 349 | RIP                    | RIP           | RIP           | CST                 | 4926               | Rabbit | 1:75     |
| 350 | RIP3                   | RIP3          | RIP3          | CST                 | 13526              | Rabbit | 1:500    |
| 351 | RPA32 (phospho S4/S8)  | RPA32_pS4/S8  | RPA2          | Bethyl              | A300-245A          | Rabbit | 1:250    |
| 352 | RPA32/RPA2             | RPA32         | RPA2          | CST                 | 2208               | Rat    | 1:150    |
| 353 | RRM1                   | RRM1          | RRM1          | CST                 | 3388               | Rabbit | 1:100    |
| 354 | RRM2                   | RRM2          | RRM2          | Life Technologies   | PA527856           | Rabbit | 1:250    |
| 355 | RSK                    | RSK           | RPS6KA1, 2, 3 | CST                 | 9347               | Rabbit | 1:150    |
| 356 | S100A4                 | S100A4        | S100A4        | CST                 | 13018              | Rabbit | 1:1000   |
| 357 | S6 (phospho S235/236)  | S6_pS235_S236 | RPS6          | CST                 | 2211               | Rabbit | 1:2500   |
| 358 | S6 (phospho S240/244)  | S6_pS240_S244 | RPS6          | CST                 | 2215               | Rabbit | 1:1000   |
| 359 | S6 Ribosomal Protein   | S6            | RPS6          | CST                 | 2317               | Mouse  | 1:750    |
| 360 | SCD                    | SCD           | SCD           | Santa Cruz          | sc-58420           | Mouse  | 1:20     |
| 361 | SDHA                   | SDHA          | SDHA          | CST                 | 11998              | Rabbit | 1:250    |
| 362 | SFRP1                  | SFRP1         | SFRP1         | CST                 | 4690               | Rabbit | 1:500    |
| 363 | Shc_pY317              | Shc_pY317     | SHC1          | CST                 | 2431               | Rabbit | 01:25    |
| 364 | SHP-2 (phospho Y542)   | SHP-2_pY542   | PTPN11        | CST                 | 3751               | Rabbit | 1:75     |
| 365 | SHP2 / PTPN11          | SHP2          | PTPN11        | CST                 | 3397               | Rabbit | 1:250    |
| 366 | SLC1A5                 | SLC1A5        | SLC1A5        | Sigma-Aldrich       | HPA035240          | Rabbit | 1:150000 |
| 367 | Slfn11                 | Slfn11        | SLFN11        | Santa Cruz          | sc-374339          | Mouse  | 1:150    |
| 368 | Smac                   | Smac          | DIABLO        | CST                 | 2954               | Mouse  | 1:150    |
| 369 | Smad1                  | Smad1         | SMAD1         | Epitomics/<br>Abcam | 1649-1/<br>ab33902 | Rabbit | 1:500    |
| 370 | Smad3                  | Smad3         | SMAD3         | Epitomics/<br>Abcam | 1735-1/<br>ab40854 | Rabbit | 1:150    |
| 371 | Smad4                  | Smad4         | SMAD4         | Santa Cruz          | sc-7966            | Mouse  | 1:30     |

|     |                              |                  |           |                     |                    |        |         |
|-----|------------------------------|------------------|-----------|---------------------|--------------------|--------|---------|
| 372 | Snail                        | Snail            | SNAI1     | CST                 | 3895               | Mouse  | 1:50    |
| 373 | SOD1                         | SOD1             | SOD1      | CST                 | 4266               | Mouse  | 1:500   |
| 374 | SOD2 (D9V9C)                 | SOD2             | SOD2      | CST                 | 13194              | Rabbit | 1:200   |
| 375 | Sox2                         | Sox2             | SOX2      | CST                 | 2748               | Rabbit | 1:50    |
| 376 | Src                          | Src              | SRC       | Millipore           | 05-184             | Mouse  | 1:50    |
| 377 | Src (phospho Y416)           | Src_pY419        | SRC       | CST                 | 2101               | Rabbit | 1:25    |
| 378 | Src (phospho Y527)           | Src_pY527        | SRC       | CST                 | 2105               | Rabbit | 1:150   |
| 379 | SRSF1/SF2                    | SF2              | SRSF1     | Invitrogen          | 324500             | Mouse  | 1:75    |
| 380 | Stat3                        | Stat3            | STAT3     | CST                 | 4904               | Rabbit | 1:3000  |
| 381 | Stat3 (phospho Y705)         | Stat3_pY705      | STAT3     | CST                 | 9145               | Rabbit | 1:100   |
| 382 | Stat5a                       | Stat5a           | STAT5A    | Epitomics/<br>Abcam | 1289-1/<br>ab32043 | Rabbit | 1:300   |
| 383 | Stathmin-1                   | Stathmin-1       | STMN1     | Epitomics/<br>Abcam | 1972-1/<br>ab52630 | Rabbit | 1:75    |
| 384 | STING                        | STING            | TMEM173   | CST                 | 13647              | Rabbit | 1:250   |
| 385 | Syk                          | Syk              | SYK       | Santa Cruz          | sc-1240            | Mouse  | 1:500   |
| 386 | Tau                          | Tau              | MAPT      | Millipore           | 05-348             | Mouse  | 1:100   |
| 387 | TAZ                          | TAZ              | WWTR1     | CST                 | 4883               | Rabbit | 1:300   |
| 388 | TFAM                         | TFAM             | TFAM      | CST                 | 7495               | Rabbit | 1:300   |
| 389 | Transferrin R                | TFRC             | TFRC      | Novus               | 22500002           | Rabbit | 1:15000 |
| 390 | TIGAR                        | TIGAR            | TIGAR     | Epitomics/<br>Abcam | S1711/<br>ab137573 | Rabbit | 1:100   |
| 391 | Transglutaminase             | Transglutaminase | TGM2      | Lab Vision          | MS-224-P1          | Mouse  | 1:150   |
| 392 | TRIM25                       | TRIM25           | TRIM25    | Abcam               | ab167154           | Rabbit | 1:3000  |
| 393 | TTF1                         | TTF1             | NKX2-1    | Epitomics/<br>Abcam | 2044-1/<br>ab76013 | Rabbit | 1:150   |
| 394 | Tuberin                      | Tuberin          | TSC2      | Epitomics/<br>Abcam | 1613-1/<br>ab32554 | Rabbit | 1:2500  |
| 395 | Tuberin/TSC2 (phospho T1462) | Tuberin_pT1462   | TSC2      | CST                 | 3617               | Rabbit | 1:38    |
| 396 | TUFM                         | TUFM             | TUFM      | Abcam               | ab173300           | Rabbit | 1:38    |
| 397 | TWEAK Receptor/FN14          | FN14             | TNFRSF12A | CST                 | 4403               | Rabbit | 1:1000  |
| 398 | TWIST                        | TWIST            | TWIST1    | Santa Cruz          | sc-81417           | Mouse  | 1:30    |
| 399 | Tyro3                        | Tyro3            | TYRO3     | CST                 | 5585               | Rabbit | 1:30    |
| 400 | UBAC1                        | UBAC1            | UBAC1     | Sigma-Aldrich       | HPA005651          | Rabbit | 1:250   |
| 401 | Ubiquityl-Histone H2B        | U-Histone-H2B    | HIST1H2BB | CST                 | 5546               | Rabbit | 1:500   |



|     |                     |            |                           |                      |                |        |         |
|-----|---------------------|------------|---------------------------|----------------------|----------------|--------|---------|
| 402 | UGT1A               | UGT1A      | UGT1A1, 3, 4, 5, 7, 8, 10 | Santa Cruz           | sc-271268      | Mouse  | 1:75    |
| 403 | ULK1 (phospho S757) | ULK1_pS757 | ULK1                      | CST                  | 6888           | Rabbit | 1:300   |
| 404 | UQCRC2              | UQCRC2     | UQCRC2                    | MitoSciences / Abcam | MS304/ab14745  | Mouse  | 01:50   |
| 405 | UVRAG               | UVRAG      | UVRAG                     | CST                  | 13115          | Rabbit | 1:100   |
| 406 | VASP                | VASP       | VASP                      | CST                  | 3112           | Rabbit | 1:100   |
| 407 | Vav1                | Vav1       | VAV1                      | CST                  | 2502           | Rabbit | 1:500   |
| 408 | VDAC1/Porin         | Porin      | VDAC1                     | Abcam                | ab14734        | Mouse  | 1:100   |
| 409 | VEGF Receptor 2     | VEGFR-2    | KDR                       | CST                  | 2479           | Rabbit | 1:3000  |
| 410 | VHL/EPPK1           | VHL-EPPK1  | EPPK1                     | BD Biosciences       | 556347         | Mouse  | 1:1500  |
| 411 | Vimentin            | Vimentin   | VIM                       | Dako/Fisher          | M0725/MS-129-P | Mouse  | 1:250   |
| 412 | Vinculin            | Vinculin   | VCL                       | Sigma-Aldrich        | SAB4200080     | Mouse  | 1:25000 |
| 413 | Wee1                | Wee1       | WEE1                      | CST                  | 4936           | Rabbit | 1:250   |
| 414 | Wee1 (phospho S642) | Wee1_pS642 | WEE1                      | CST                  | 4910           | Rabbit | 1:50    |
| 415 | WIPI1               | WIPI1      | WIPI1                     | CST                  | 12124          | Rabbit | 1:150   |
| 416 | WIPI2               | WIPI2      | WIPI2                     | CST                  | 8567           | Rabbit | 1:150   |
| 417 | XBP-1               | XBP-1      | XBP1                      | Santa Cruz           | sc-32136       | Goat   | 1:200   |
| 418 | XIAP                | XIAP       | XIAP                      | CST                  | 2042           | Rabbit | 1:100   |
| 419 | XPA                 | XPA        | XPA                       | Santa Cruz           | sc-56813       | Mouse  | 1:75    |
| 420 | XPF                 | XPF        | ERCC4                     | Abcam                | ab73720        | Rabbit | 1:100   |
| 421 | XPG                 | ERCC5      | ERCC5                     | Proteintech Group    | 11331-1-AP     | Rabbit | 1:250   |
| 422 | XRCC1               | XRCC1      | XRCC1                     | CST                  | 2735           | Rabbit | 1:20    |
| 423 | YAP                 | YAP        | YAP1                      | Santa Cruz           | sc-376830      | Mouse  | 1:300   |
| 424 | YAP (phospho S127)  | YAP_pS127  | YAP1                      | CST                  | 4911           | Rabbit | 1:250   |
| 425 | YB1 (phospho S102)  | YB1_pS102  | YBX1                      | CST                  | 2900           | Rabbit | 1:50    |
| 426 | ZAP-70              | ZAP-70     | ZAP70                     | CST                  | 2705           | Rabbit | 1:500   |

**Table S3.** Molecular/signaling characteristics of *MMTV-R26<sup>Met</sup>* tumors identified through RPPA analysis.

| Sample | 14-3-3-beta | 14-3-3-zeta | 4E-BP1      | 4E-BP1_pS65 | 53BP1       | A-Raf       | ACC1        | ACC_pS79    | Akt         | Akt_pS473   |
|--------|-------------|-------------|-------------|-------------|-------------|-------------|-------------|-------------|-------------|-------------|
| T1     | 1,00030313  | 1,112909745 | 1,134492549 | 1,137233694 | 1,447094044 | 0,994553464 | 1,181854819 | 1,197543263 | 1,102463951 | 0,720638799 |
| T2     | 0,941037749 | 1,096944273 | 1,027642301 | 1,216365052 | 1,226844507 | 1,198216315 | 0,911067172 | 0,918659697 | 0,90597967  | 0,783979594 |
| T3     | 1,245118013 | 0,757216041 | 0,882534965 | 0,93677973  | 0,384268168 | 0,580713129 | 0,302714776 | 0,307450113 | 0,99411866  | 0,924505019 |
| T4     | 0,843563418 | 1,047775802 | 0,902704787 | 1,108629724 | 0,855440051 | 1,073170685 | 0,626047448 | 0,814158536 | 1,106024715 | 0,746302303 |
| T5     | 0,890252276 | 1,226663216 | 1,184383298 | 1,260307415 | 0,93378607  | 1,088196632 | 1,208043539 | 1,169484449 | 0,84737051  | 0,895688597 |
| T6     | 0,93645119  | 1,005972333 | 1,194694942 | 1,054710983 | 1,189703081 | 1,223393087 | 0,69113579  | 0,14513807  | 0,897245656 | 0,325770129 |
| T7     | 0,985372751 | 1,05955999  | 1,263612676 | 1,234111085 | 1,404953067 | 1,016783258 | 1,050783876 | 1,025081272 | 0,939280133 | 0,486231922 |
| T8     | 0,863746677 | 1,239080121 | 0,853463853 | 1,176759829 | 1,510982604 | 1,146751384 | 0,825043095 | 1,13633138  | 1,11054025  | 0,913958817 |
| T9     | 0,925172458 | 1,248622659 | 1,369888819 | 1,272146599 | 1,440378765 | 0,969565693 | 0,989826514 | 1,009446208 | 1,059704219 | 0,732273159 |
| T10    | 0,950840569 | 1,137862054 | 1,387515563 | 1,129187785 | 1,090606388 | 1,066259701 | 0,753114714 | 0,78318462  | 0,844195763 | 0,853441455 |
| T11    | 0,817212578 | 1,014257531 | 1,014197744 | 0,861902884 | 0,947313349 | 1,052522223 | 1,093881911 | 1,082935858 | 1,120470229 | 0,974542868 |
| T12    | 1,03998673  | 1,094035434 | 1,275213813 | 1,170383334 | 1,317040387 | 0,979142264 | 0,96358135  | 1,151345074 | 1,139495304 | 2,01446105  |
| T13    | 1,017625373 | 1,048012612 | 0,750049112 | 1,061406134 | 0,945045464 | 0,891689943 | 0,395264773 | 0,522335999 | 0,83651811  | 6,805906933 |
| T14    | 1,211802243 | 1,122590701 | 1,04265535  | 0,909412674 | 0,686463438 | 1,134026642 | 0,608433899 | 0,813731225 | 1,101593417 | 1,302656486 |
| T15    | 1,077863185 | 1,139889093 | 0,926640629 | 1,1019766   | 0,960782985 | 0,939882009 | 0,650313996 | 0,747168934 | 1,316225115 | 1,065531224 |
| T16    | 1,007403104 | 1,162129699 | 1,045959689 | 1,097375679 | 0,966304379 | 1,015226523 | 0,679954377 | 0,803804062 | 1,106787398 | 0,915525325 |
| T17    | 0,965560836 | 1,265364374 | 0,902678014 | 1,217621153 | 0,773950562 | 1,137843915 | 0,636906952 | 0,772715336 | 1,043402038 | 0,900258261 |
| T18    | 0,897611045 | 0,991430929 | 1,23006533  | 1,597264099 | 1,548351183 | 1,152894977 | 0,725471131 | 0,926021669 | 1,110552168 | 0,950555405 |
| T19    | 0,933238047 | 1,039550859 | 1,736692426 | 1,404388906 | 1,017718425 | 1,068116608 | 1           | 1,082159856 | 1,355815816 | 0,571355996 |
| T20    | 0,928451687 | 1,052360811 | 1,072346262 | 0,998826644 | 0,793427054 | 0,913167381 | 0,433369405 | 0,675786219 | 0,874258653 | 1,43691674  |
| T21    | 0,918862457 | 0,978238756 | 1,333393795 | 1,134903538 | 0,873341792 | 0,917925863 | 1,276197022 | 1,366606083 | 0,950787718 | 0,889009113 |
| T22    | 0,933876569 | 0,545456675 | 0,417475528 | 0,754254632 | 0,419997194 | 0,557967669 | 0,213328439 | 0,315396431 | 0,378923613 | 3,863099235 |
| T23    | 0,800170574 | 0,9657963   | 0,876890933 | 0,932487044 | 0,944547246 | 0,991183413 | 1,009073519 | 1,32439926  | 1,531700485 | 2,726033381 |
| T24    | 0,998593076 | 1,235547228 | 1,27248621  | 1,381722847 | 1,423449099 | 0,89640053  | 1,108624092 | 1,380400047 | 0,971670192 | 1,663675989 |
| N1     | 0,822850439 | 0,619543551 | 0,698145721 | 0,710435346 | 0,381816917 | 0,70722531  | 3,360065853 | 2,108678779 | 0,488063966 | 0,991773211 |
| N2     | 0,961319758 | 0,63981164  | 0,982891136 | 0,919567691 | 0,348989132 | 0,804085605 | 3,00322954  | 1,902650763 | 0,681699351 | 1,139334501 |
| N3     | 0,977415159 | 0,590343678 | 1,026865551 | 0,876695954 | 0,345709493 | 0,582900753 | 2,336784039 | 1,487356495 | 0,374327279 | 0,94939265  |

| Akt_pT308   | AMPK-a2_pS345 | AMPKa       | AMPKa_pT172 | AR          | ARID1A      | Atg3        | Atg7        | ATM         | ATM_pS1981  | ATR_pS428   |
|-------------|---------------|-------------|-------------|-------------|-------------|-------------|-------------|-------------|-------------|-------------|
| 0,906277073 | 1,039448488   | 0,983553321 | 1,005736217 | 1,034786543 | 0,99261002  | 0,952801101 | 0,897605057 | 1,250909885 | 0,954248231 | 1,069764814 |
| 0,919392833 | 0,962364296   | 1,137137669 | 1,023455848 | 0,928971023 | 1,608431904 | 0,950128565 | 1,016021747 | 1,746167849 | 0,898804229 | 0,947903557 |
| 1,234067532 | 1,027639557   | 0,717918343 | 0,517299149 | 0,48095966  | 0,305538572 | 1           | 1,134149856 | 0,574129574 | 1,409557465 | 0,841320619 |
| 1,038753193 | 1,031319897   | 1,10339874  | 1,190598039 | 0,800992049 | 0,876614626 | 0,877954285 | 1,180311361 | 0,761215968 | 1,014249365 | 0,748569997 |
| 0,902597672 | 0,906582726   | 1,151562842 | 1,081831828 | 0,897823961 | 1,304870796 | 0,882493758 | 0,848368391 | 1,453886617 | 0,986112008 | 1,00480032  |
| 0,634527581 | 0,968615001   | 1,207414439 | 1,090044705 | 1,104000705 | 1,422561781 | 1,040407658 | 0,977515608 | 0,999130409 | 0,947820407 | 0,998691021 |
| 0,852323375 | 0,996417132   | 0,934347428 | 0,991054466 | 0,888861114 | 1,32772081  | 1,03825765  | 0,882056647 | 1,003323421 | 1,062369295 | 0,930525225 |
| 1,137674538 | 1,088868073   | 1,294449187 | 1,39550735  | 0,554599806 | 0,656260779 | 0,82326045  | 1,106127266 | 0,684083925 | 0,943864558 | 0,87345653  |
| 0,900585396 | 1,049738913   | 1,086657044 | 1,095100742 | 0,967657026 | 1,505963851 | 0,876599424 | 0,942562061 | 1,419579567 | 1,021712492 | 1,074122299 |
| 0,950899754 | 1,134676365   | 1,15582576  | 1,095424885 | 0,998154866 | 1,303274437 | 0,774040907 | 0,906845548 | 1,388638709 | 1,043699853 | 1,094538709 |
| 1,053278972 | 1,010177859   | 1,03032509  | 1,005909801 | 1,164581939 | 0,686681104 | 0,779805722 | 1,068196832 | 1,05207154  | 0,947708578 | 0,977508318 |
| 1,32615107  | 0,993624302   | 0,976145435 | 0,976345945 | 0,96509194  | 1,215694809 | 0,774663563 | 0,921129611 | 1,04898057  | 0,976777129 | 0,967528786 |
| 2,393555921 | 0,862057129   | 1,084457112 | 0,659587568 | 0,881157428 | 1,222825587 | 0,845691189 | 0,830651548 | 0,917011594 | 1,063707892 | 0,976547973 |
| 1,063543863 | 0,95990482    | 1,170891812 | 0,901462475 | 0,856820149 | 0,542342364 | 1,292141354 | 1,3066609   | 0,885117722 | 0,864535343 | 0,713915378 |
| 1,038580954 | 0,913359358   | 0,923746717 | 0,893018102 | 0,656064662 | 0,975996094 | 1,004696031 | 1,200922363 | 1,011501996 | 0,954818725 | 0,97081817  |
| 1,012045259 | 0,936988553   | 1,155886853 | 1,01237763  | 1,0428335   | 1,135651751 | 0,936805474 | 0,938815886 | 0,944473673 | 1,037054605 | 0,890577823 |
| 0,907896729 | 0,859532338   | 1,079404996 | 0,938347597 | 1,048556388 | 0,751212882 | 0,994364598 | 1,112034836 | 1,490479498 | 0,960607868 | 0,976429598 |
| 0,863919693 | 0,964201089   | 1,125344876 | 1,050463834 | 0,909773111 | 1,475606851 | 0,929740052 | 1,002662306 | 1,749524112 | 0,929096619 | 0,936600607 |
| 0,801263831 | 1,094527698   | 1,127773688 | 1,182583672 | 0,847770527 | 1,504449406 | 0,807320289 | 0,905550182 | 1,274661418 | 0,924095499 | 0,933109343 |
| 1,266834357 | 0,821468171   | 1,120350589 | 0,82510951  | 0,710140773 | 0,565699336 | 0,884656242 | 1,097439935 | 0,70749545  | 1,07576532  | 0,899108485 |
| 1,090086204 | 1,046945894   | 0,813719584 | 0,755305277 | 0,696394513 | 0,964102876 | 0,792287944 | 0,874181241 | 0,763870683 | 1,218618686 | 0,935249645 |
| 2,025598422 | 1,071080068   | 0,567733495 | 0,425164667 | 0,744776102 | 0,85915432  | 0,502339187 | 0,592050323 | 1,002715565 | 1,369705949 | 0,915339048 |
| 1,558861966 | 1,037529874   | 0,981108579 | 1,001467012 | 0,93140676  | 1,038421038 | 0,703860751 | 1,01215664  | 1,54227391  | 1,025681767 | 0,992331284 |
| 1,213196916 | 1,023873253   | 1,170211407 | 1,216501015 | 0,815353401 | 1,439965449 | 0,911292024 | 0,969610934 | 1,068481297 | 0,932377422 | 0,965862452 |
| 1,038948409 | 1,016353635   | 0,955406936 | 0,423815167 | 2,056643929 | 0,664354985 | 1,115550242 | 0,636867421 | 0,969524908 | 1,19739591  | 1,249585999 |
| 0,996610783 | 1,02166068    | 1           | 0,696828063 | 1,918041384 | 0,514336123 | 1,055366827 | 0,736479036 | 0,926380569 | 1,134027187 | 1,072491495 |
| 0,810915732 | 1,025700295   | 1,582223106 | 0,659657529 | 2,313458017 | 0,465951245 | 1,07686836  | 0,849734189 | 1,102360025 | 1,26998829  | 0,82518238  |

| Aurora-B    | Axl         | b-Actin     | b-Catenin   | Catenin_pT41_S45 | B-Raf       | B-Raf_pS445 | B7-H4       | Bad_pS112   | Bak         | Bax         |
|-------------|-------------|-------------|-------------|------------------|-------------|-------------|-------------|-------------|-------------|-------------|
| 1,18449035  | 1,087090696 | 1,414838545 | 1,056757564 | 1,139319141      | 1,223994396 | 1,061436479 | 0,890897194 | 0,948628259 | 0,874344503 | 1,003675359 |
| 1,007131724 | 0,925581062 | 0,887372578 | 1,531516363 | 1,237116735      | 1,292053137 | 1,175672764 | 0,901742913 | 1,017092646 | 1,033275584 | 1,032030568 |
| 0,991316655 | 0,954169469 | 1,151239261 | 0,415157814 | 1,321509279      | 0,570035416 | 0,809274063 | 1,135132098 | 1,088430419 | 1,178829844 | 0,62412262  |
| 1,013914341 | 0,745866166 | 1,162439661 | 0,699102862 | 1,032959535      | 0,95749834  | 1,017230248 | 0,924385515 | 1,162873541 | 0,693073514 | 0,883814664 |
| 1,07858742  | 0,956894829 | 0,836317598 | 1,417942978 | 1,176608926      | 1,035404321 | 0,87481818  | 0,973262461 | 1,068368231 | 0,897358066 | 0,879263858 |
| 0,954223754 | 1,204692915 | 1,05491283  | 1,109456768 | 0,947246857      | 1,086365493 | 0,53246517  | 1,078336519 | 0,68947732  | 1,007535349 | 1,104729135 |
| 0,957188586 | 0,935070648 | 0,966475676 | 0,760087919 | 1,150623757      | 0,880508094 | 0,779410705 | 0,937752587 | 0,870622717 | 0,964314864 | 1,176870188 |
| 1,031980975 | 0,841439381 | 1,045712538 | 0,86604425  | 1,188970298      | 1,083501823 | 1,308020672 | 0,961137001 | 1,222114906 | 0,821124106 | 0,909665389 |
| 1           | 0,69688318  | 0,833791744 | 1,068331143 | 1,252959539      | 1,349647405 | 1,271886779 | 0,958010684 | 1,02085139  | 0,930668195 | 1,310090331 |
| 0,907109041 | 1,056512193 | 1,062045188 | 1,202932251 | 1,105390737      | 1,179795334 | 1,156920715 | 0,964129424 | 1,074399405 | 1,135855839 | 1,041258404 |
| 1,028824741 | 1,094638832 | 1,097191901 | 1,064131705 | 0,951569777      | 1,231772081 | 1,060773619 | 1,053930163 | 0,968755511 | 0,928344324 | 0,870128269 |
| 0,97952723  | 0,977130346 | 0,963129348 | 0,842261193 | 1,067683553      | 1,034858574 | 1,038245784 | 0,949348223 | 1,00010892  | 0,923649979 | 0,995272542 |
| 0,869633496 | 1,165473776 | 1,024501989 | 1,430524229 | 1,155973698      | 1,154545064 | 1,177654184 | 1,112340422 | 1,197551203 | 1,186517395 | 0,860057172 |
| 1,01676825  | 0,973653862 | 1,23737939  | 1,034546851 | 1,198460601      | 0,893191744 | 1,296289679 | 1,044722596 | 1,30235415  | 1,141140537 | 1,007921252 |
| 0,915940562 | 0,962491778 | 1,5449353   | 1,237883177 | 1,199649718      | 0,946873852 | 1,078239539 | 0,913595313 | 1,206288219 | 1,06207767  | 1,207922839 |
| 0,962553983 | 0,839235759 | 1,256094867 | 1,03586576  | 0,911733989      | 0,880073965 | 0,944948797 | 1,013201595 | 1,001858327 | 0,939317157 | 0,932091887 |
| 1,096233911 | 1,083593244 | 1,470924543 | 0,87768101  | 1,019013065      | 1,172420033 | 1,282318686 | 0,981485639 | 1,100437513 | 1,14355804  | 1,036150536 |
| 0,947018765 | 0,937396078 | 0,993015439 | 1,246157485 | 0,972293942      | 1,34045197  | 1,365706925 | 0,960749696 | 1,034414238 | 0,982339164 | 1,382173991 |
| 1,065774866 | 1,066288334 | 1,1357293   | 1,180960895 | 1,070747818      | 1,235507501 | 1,291973377 | 0,933177395 | 1,093737168 | 0,918820678 | 1,272747135 |
| 1,195423101 | 0,866195733 | 1,10632144  | 0,715211258 | 0,728262956      | 0,918922268 | 1,147715957 | 1,246219241 | 1,047488516 | 0,897487425 | 0,803470748 |
| 1,109748069 | 0,912034056 | 1,057542813 | 0,479747648 | 1,117285584      | 0,898319133 | 0,923197351 | 1,014799263 | 0,952803794 | 1,039650434 | 1,310382267 |
| 1,431256454 | 1,311203329 | 0,991958809 | 0,485579231 | 1,10060945       | 0,781873804 | 0,660045144 | 1,345783071 | 0,734882944 | 1           | 0,5269289   |
| 1,071203057 | 0,963687336 | 1,484345303 | 0,980196064 | 0,940909402      | 1,043157092 | 0,985102592 | 0,961255447 | 1,04826267  | 0,846474543 | 1,030397297 |
| 0,947307727 | 0,967205113 | 0,923606977 | 1,151318933 | 0,981354633      | 1,307091798 | 1,307501638 | 0,907705767 | 1,17163516  | 0,93614206  | 0,928592653 |
| 1,570742641 | 1,703762778 | 0,808381267 | 0,520028735 | 0,935586377      | 0,667902531 | 0,425208977 | 1,100881429 | 0,708541616 | 0,892342891 | 0,508927683 |
| 1,016567707 | 1,728155595 | 0,827151506 | 1,199560769 | 0,973550477      | 0,736810905 | 0,643466345 | 1,152184302 | 0,860218649 | 1,019157262 | 0,575664963 |
| 1,492168044 | 2,101296125 | 0,705221341 | 0,444643066 | 1,012111385      | 0,699430949 | 0,512812891 | 1,401674197 | 0,973043762 | 1,090045698 | 0,571913786 |

| Bcl-xL      | Beclin      | Bid         | Bim         | BRD4        | c-Abl       | c-IAP2      | c-Jun_pS73  | c-Kit       | c-Myc       | C-Raf       |
|-------------|-------------|-------------|-------------|-------------|-------------|-------------|-------------|-------------|-------------|-------------|
| 1,02812525  | 0,942337878 | 0,867086961 | 1,088330566 | 1,031485972 | 1,035652119 | 1,030350751 | 1,129897396 | 1,010752369 | 1,065990853 | 0,897389178 |
| 1,049479618 | 0,996699251 | 1,008765878 | 1,057318013 | 1,001306126 | 0,958409887 | 1,024476555 | 1,531928896 | 1,052220677 | 1,299017692 | 1,088136514 |
| 0,709650836 | 1,295232334 | 0,878728627 | 0,653061586 | 1,079156784 | 0,820733097 | 1,364696468 | 1,183833471 | 1,000982091 | 1,147864342 | 0,778773298 |
| 0,774808429 | 0,998612148 | 0,844360562 | 0,919542513 | 1,070131651 | 0,856074545 | 0,964524365 | 1,082107816 | 1,005060253 | 1,165969073 | 0,907180267 |
| 1,002844274 | 0,903310071 | 0,936875551 | 0,961513103 | 1,018457063 | 0,857730878 | 1           | 1,287395119 | 1,012433073 | 1,116426133 | 1,017986523 |
| 1,169576179 | 0,976451837 | 1,026213329 | 1,510443173 | 0,985320707 | 1,162115946 | 1,002932635 | 0,745408287 | 1,011017669 | 0,839294358 | 0,984255747 |
| 1,388941037 | 1,01891683  | 1,037083184 | 1,30015777  | 1,110795888 | 0,9237513   | 1,088097092 | 1,137161874 | 1,050183739 | 1,079290679 | 0,972730721 |
| 0,982148759 | 0,966360133 | 0,826454436 | 1,403947784 | 1,089663486 | 0,816896168 | 0,961244037 | 1,270206362 | 0,984153951 | 1,062644675 | 1,000572219 |
| 0,961366513 | 0,913945405 | 0,950496335 | 1,072384157 | 1,006859012 | 1,021287842 | 1,055514055 | 1,098263047 | 1,036740704 | 1,089152633 | 1,032202142 |
| 0,96204955  | 0,963017775 | 1,156347774 | 1,58410474  | 1,016487478 | 0,934767227 | 0,810493521 | 1,322685114 | 1,001854448 | 1,271264311 | 1,049850659 |
| 1,042903124 | 0,89919724  | 0,888649406 | 0,973506738 | 0,903896155 | 0,927378367 | 0,836874959 | 0,761183577 | 0,841129909 | 0,829512094 | 1,057736083 |
| 1,028111046 | 0,953761915 | 1,027835641 | 1,244451012 | 0,911619918 | 1,106414618 | 0,980343069 | 0,913888045 | 0,972393649 | 1,168213481 | 1,019322995 |
| 0,963159274 | 1,034068169 | 0,905508399 | 0,947613892 | 0,920670803 | 1,182446114 | 0,993903451 | 1,019750728 | 0,899439672 | 1,022886854 | 0,97047247  |
| 0,809150092 | 1,158135454 | 0,96772053  | 1,070831529 | 1,028212103 | 1,081521573 | 0,970063076 | 0,934382083 | 0,818001065 | 0,977614878 | 0,813261655 |
| 1,019839124 | 1,031290179 | 0,901020239 | 1,048629397 | 1,073533708 | 0,931758096 | 1,096511572 | 1,45789205  | 0,962584025 | 1,121590387 | 0,969668697 |
| 1,194028993 | 1,142404416 | 1,103615663 | 0,891577392 | 0,957505241 | 0,949296343 | 1,053209743 | 1,082773054 | 0,95763726  | 0,906809263 | 0,943371259 |
| 0,920349426 | 0,948778337 | 1,051469718 | 1,290934703 | 0,923348174 | 0,837550428 | 1,012969497 | 1,056468866 | 0,933617766 | 0,911647579 | 1,029645422 |
| 1,017650891 | 0,907851307 | 1,168389286 | 1,069666864 | 0,962992132 | 1,005470806 | 1,050334743 | 1,569976703 | 1,035995554 | 1,486145285 | 1,117363905 |
| 1,153575149 | 0,890708141 | 1,04856261  | 1,155439679 | 1,025719333 | 1,039660708 | 1,071520265 | 1,305735811 | 0,982304013 | 1,02481481  | 1,126245699 |
| 0,797717794 | 1,044315547 | 1           | 0,823319837 | 1,137632313 | 0,846172205 | 0,964469849 | 1,310389106 | 0,964879176 | 1,018365263 | 0,810570357 |
| 1,006252656 | 0,961338323 | 1,240505506 | 1           | 1,031404503 | 0,889282632 | 1,042932212 | 1,132083415 | 0,911906068 | 1,136033269 | 0,915854414 |
| 0,675052583 | 1,406292641 | 0,67186617  | 0,725642062 | 1,613092877 | 0,575406234 | 0,685730028 | 0,948938437 | 1,160410471 | 0,943078712 | 0,666101539 |
| 1           | 0,807247744 | 0,85117856  | 0,801288626 | 0,91383452  | 0,940875593 | 0,803162154 | 0,878472301 | 1,043869389 | 1,04164572  | 1,067018148 |
| 0,854721764 | 0,964868303 | 0,887642712 | 1,083459665 | 1,018494823 | 1,008699993 | 1,027461922 | 1,133361907 | 1,037179429 | 1,392704517 | 1,050136418 |
| 0,7165335   | 0,835860413 | 1,118523593 | 0,631391532 | 1,545719658 | 1,079336223 | 0,869235926 | 1           | 0,764951697 | 0,965730945 | 0,669777722 |
| 0,82132354  | 1,042860458 | 1,388357397 | 0,715912341 | 1,463334493 | 1,03972651  | 0,823789435 | 1,282690361 | 0,783010752 | 0,877992605 | 0,661427409 |
| 0,874607689 | 1,269364038 | 1,467575094 | 0,693285152 | 1,773393339 | 0,996350895 | 0,93903938  | 1,272102378 | 0,83180102  | 0,814455707 | 0,673747483 |

| C-Raf_pS338 | Caspase-3   | Caspase-7-cleaved | Caveolin-1  | CD134       | CD20        | CD4         | cdc25C      | Cdc2_pY15   | CDK1        | Chk1_pS296  |
|-------------|-------------|-------------------|-------------|-------------|-------------|-------------|-------------|-------------|-------------|-------------|
| 0,867295438 | 1,000959699 | 0,925511774       | 0,479700257 | 0,871265319 | 0,775336088 | 0,921174923 | 0,945371715 | 0,914436008 | 1,330130543 | 1,035727144 |
| 1,082200845 | 1,055642329 | 1,471618901       | 0,577119438 | 0,922656268 | 1,025992994 | 0,991215887 | 0,917730545 | 1,068987286 | 1,533934756 | 0,805132758 |
| 0,760761809 | 1,020651627 | 1,656418837       | 0,913615018 | 1,175355304 | 1,426420718 | 0,896941767 | 0,832577116 | 1,007947697 | 0,621350221 | 1,401653969 |
| 1,245358426 | 1,042150336 | 1,42458202        | 0,496106717 | 0,819133732 | 0,895216074 | 0,774153016 | 0,987824652 | 0,981978466 | 1,088184206 | 1,268036046 |
| 0,987804014 | 1,121716925 | 0,964800664       | 0,401798549 | 0,85069715  | 0,777259699 | 0,887040712 | 1,006435906 | 1,081912856 | 1,292210402 | 0,783906993 |
| 0,60476035  | 1,208024556 | 1,135259287       | 0,808348742 | 0,926727113 | 1,10342551  | 1,083672538 | 1,019068139 | 0,824837575 | 1,650737269 | 1,336168974 |
| 0,81918803  | 1,105451397 | 0,881513895       | 0,527176076 | 0,944542981 | 0,920692748 | 0,971771899 | 1,244295796 | 0,841812414 | 1,406006635 | 0,929440861 |
| 1,353491634 | 1,071133213 | 0,895501141       | 1,29428858  | 0,851056776 | 0,912653434 | 0,894653217 | 0,982257452 | 1,087805217 | 1,249829473 | 0,992811591 |
| 0,964934684 | 0,999856339 | 1,069529537       | 0,4739244   | 0,930939972 | 0,797464757 | 0,938364634 | 0,924374332 | 0,895934448 | 1,373034655 | 0,898887702 |
| 0,884956688 | 1,397009276 | 1,342052156       | 0,846105771 | 0,877189442 | 0,894161711 | 0,84724859  | 0,783981702 | 1,15104014  | 1,190267401 | 0,999815562 |
| 0,998305431 | 0,788089429 | 1,594853655       | 0,543298329 | 1,055133054 | 0,9357062   | 0,775162183 | 0,778138271 | 0,876193576 | 1,024330131 | 1,20818014  |
| 0,971243396 | 1,030067002 | 0,859727914       | 0,566834893 | 0,961163576 | 0,917600511 | 0,80839878  | 0,82969613  | 1,088759348 | 1,362594587 | 0,918829458 |
| 1,265824216 | 0,941092439 | 1,228988608       | 7,583045684 | 0,910504853 | 1,057044541 | 0,907386727 | 1,073638504 | 0,803196327 | 0,627222038 | 1,011294869 |
| 1,181887288 | 0,916095557 | 1,042560376       | 5,192564468 | 0,86348801  | 1,438374133 | 0,791148521 | 1,140330711 | 0,872934898 | 0,620217611 | 1,649064774 |
| 0,900804745 | 1,023752558 | 1,353285357       | 0,562129699 | 0,93747421  | 1,101572723 | 0,922699262 | 0,732041258 | 0,932686296 | 1,15206987  | 2,393576918 |
| 0,880085552 | 1,029179469 | 1,185014134       | 1,088241416 | 0,94779079  | 1,14669623  | 0,920760915 | 0,906902156 | 0,992069432 | 0,973183086 | 1,307163094 |
| 1,271265267 | 0,990835302 | 1,236496459       | 0,944898342 | 0,885294343 | 1,096610194 | 0,877773094 | 1,229215983 | 1,110137571 | 1,172088445 | 1,492848628 |
| 1,082379719 | 1,163663349 | 0,857339649       | 0,80321579  | 0,918668782 | 0,919920257 | 0,955964239 | 0,991051272 | 1,030702958 | 1,371670732 | 0,92291082  |
| 1,358700295 | 1,148124041 | 0,711305922       | 0,797172169 | 0,844337092 | 0,869872351 | 0,88132508  | 1,315268248 | 0,89978305  | 1,222401633 | 1,03030341  |
| 1,023083781 | 0,97742663  | 0,917060382       | 1,415775029 | 1,01363621  | 1,330427002 | 1,061827022 | 1,034505738 | 0,988947286 | 0,838908303 | 1,348332517 |
| 1,144444169 | 1,147821445 | 1,122981971       | 0,3719211   | 0,861437391 | 0,998721011 | 0,980282838 | 0,929740945 | 0,936925023 | 1,166561163 | 0,986187429 |
| 1,075680646 | 1,364457488 | 0,695537312       | 2,42148905  | 0,59209477  | 1,715686572 | 1,962650888 | 1,454093415 | 0,974919174 | 1,085186283 | 1,226863681 |
| 1,070105172 | 0,840554838 | 0,896225802       | 0,939279714 | 0,712881511 | 0,983530707 | 0,719331316 | 0,759639113 | 1,047604692 | 1,5029133   | 1,384105564 |
| 1,472577509 | 0,993161813 | 0,820098726       | 1,034863972 | 0,988682913 | 0,952062335 | 0,955650914 | 0,903676673 | 1,025782305 | 1,502202511 | 0,935357221 |
| 1,072255545 | 0,907308002 | 0,865146641       | 2,216818839 | 1,234439539 | 1,350983279 | 1,208917135 | 2,837740832 | 1,120047929 | 0,730886764 | 0,81530021  |
| 1,192211116 | 0,967561694 | 1,066671931       | 7,233938264 | 1,142255671 | 1,320647366 | 1,150216031 | 2,966050295 | 1,260726922 | 0,792653889 | 0,859406067 |
| 1,252462698 | 0,995048436 | 0,940254744       | 20,75855182 | 1,2790254   | 2,199771741 | 1,293910141 | 2,78259476  | 1,046401161 | 1,193026237 | 0,980667937 |

| Chk2_pT68   | Claudin-7   | COG3        | Collagen-VI | Connexin-43 | Cox-IV      | Cox2        | Creb        | Cyclin-B1   | Cyclin-D1   | D-a-Tubulin |
|-------------|-------------|-------------|-------------|-------------|-------------|-------------|-------------|-------------|-------------|-------------|
| 0,856951624 | 1,089833776 | 1,124177148 | 0,808835596 | 1,106836373 | 0,941849188 | 0,97932357  | 0,978442357 | 0,869384814 | 0,981715786 | 0,938087843 |
| 1,002629451 | 1,509736017 | 0,852957157 | 0,891031502 | 0,948536741 | 0,915806141 | 0,995550269 | 1,024570722 | 0,915806141 | 0,962477144 | 1,009210002 |
| 1,111968503 | 0,908164    | 0,93483863  | 1,755729294 | 0,677509944 | 1,131397804 | 1,002453993 | 0,993968502 | 1,131397804 | 1,21863609  | 1,28252324  |
| 1,180429311 | 0,889878605 | 0,955582022 | 1,006786185 | 0,995920245 | 1,183189393 | 1,364693696 | 0,901656608 | 1,183189393 | 1,097666071 | 1,041964469 |
| 1,056126566 | 1,503343769 | 1,08258623  | 0,92222927  | 0,781972937 | 0,787643965 | 0,968077077 | 0,981872624 | 0,787643965 | 1,008012254 | 0,94209367  |
| 1,165901745 | 1,242272958 | 1,10136603  | 0,930498847 | 1,040417236 | 1           | 1,031721376 | 1,042446322 | 1           | 1,462593394 | 1,323577202 |
| 1,212816431 | 1,566390081 | 1,055773847 | 0,954448696 | 1,537724652 | 0,92930878  | 0,926266376 | 1,027377838 | 0,92930878  | 0,917632337 | 1,056515545 |
| 1,232645473 | 1,234427302 | 0,862636233 | 1,065954593 | 1,345336369 | 1,334799989 | 0,781790076 | 0,943838491 | 1,334799989 | 0,98731963  | 0,881044298 |
| 1,093771681 | 1,266547948 | 0,987702213 | 0,742729058 | 1,224230083 | 0,890984391 | 0,90419881  | 1,03569998  | 0,890984391 | 0,890852346 | 0,887201494 |
| 1,051903516 | 1,918802212 | 1,054638615 | 1,087574167 | 0,940341485 | 0,785632569 | 1,025667724 | 0,949100874 | 0,785632569 | 1,020541428 | 1,066657404 |
| 0,664719451 | 1,045652327 | 1,140437243 | 0,940499033 | 1,02503075  | 1,057420285 | 1,208436834 | 0,995817378 | 1,057420285 | 1,216293668 | 0,940640738 |
| 1,055730171 | 0,830178731 | 0,864524641 | 1,231259538 | 0,990305733 | 0,983226513 | 0,969679046 | 0,983840956 | 0,983226513 | 1,019815783 | 0,994720386 |
| 0,862321096 | 1,341299537 | 1,117482551 | 0,837601406 | 1,355625416 | 0,807683589 | 0,981432885 | 0,963077665 | 0,807683589 | 0,944659976 | 0,946266786 |
| 1,048541539 | 0,9745352   | 0,985755734 | 1,429696027 | 0,47900067  | 1,129335468 | 0,733697925 | 0,975560892 | 1,129335468 | 1,08162973  | 0,858747131 |
| 1,075802404 | 0,994695359 | 1,124952325 | 1,042784998 | 0,886944447 | 0,898645048 | 0,901587064 | 1,090832337 | 0,898645048 | 0,98145023  | 0,987495657 |
| 1,159810274 | 1,209315208 | 0,915075574 | 1,175183476 | 0,987355313 | 0,943653081 | 1,082969044 | 0,993784298 | 0,943653081 | 1,218609116 | 1,091432021 |
| 1,078250398 | 0,801810332 | 0,979854142 | 1,595750096 | 0,991577307 | 0,792985253 | 1,041451823 | 0,918882281 | 0,792985253 | 1,009470291 | 0,917361098 |
| 1,154008836 | 0,984884715 | 1,109028393 | 0,965498381 | 1,309507173 | 0,92304201  | 0,87854597  | 0,939084734 | 0,92304201  | 0,900719634 | 0,825394496 |
| 1,106712255 | 0,84686274  | 0,939831516 | 0,984321333 | 0,891894043 | 0,768032445 | 0,920841824 | 0,956485157 | 0,768032445 | 1,004358822 | 0,921979594 |
| 1,031524917 | 1,087900265 | 1,252374885 | 1,246551344 | 0,625525043 | 1,374071717 | 1,083370411 | 0,87634242  | 1,374071717 | 0,974613556 | 1,053544039 |
| 1,005322321 | 1,236897248 | 1,059581956 | 1,00896321  | 1,207959352 | 1,263434755 | 0,830633842 | 1,011825337 | 1,263434755 | 0,861888333 | 0,9087405   |
| 1,107296093 | 1,294522217 | 1,035721193 | 1,577995211 | 0,56418926  | 1,975982845 | 1,166217824 | 0,8039812   | 1,975982845 | 1,077293453 | 1,137387217 |
| 0,679801562 | 0,901030908 | 1,02508114  | 0,850421365 | 1,222489077 | 0,986457081 | 1,049217687 | 0,989055351 | 0,986457081 | 0,964578443 | 1,00319944  |
| 0,951460701 | 1,060401046 | 0,977993241 | 1,117617953 | 0,9613685   | 0,949246349 | 0,974307807 | 0,948653141 | 0,949246349 | 0,976983602 | 0,953276611 |
| 0,928430089 | 0,987240455 | 0,981538285 | 1,227351007 | 0,264894721 | 1,275737202 | 0,875563726 | 0,884070618 | 1,370364777 | 0,994589323 | 0,635117799 |
| 1,161562075 | 1,389829522 | 1,26372227  | 1,344971297 | 0,188643867 | 1,213257289 | 0,960815344 | 0,871941541 | 1,502541425 | 1,014646176 | 0,837628026 |
| 1,046064088 | 0,903366834 | 0,86278296  | 1,734807856 | 0,32674927  | 2,172345353 | 0,859555653 | 0,877532394 | 2,172345353 | 1,003039528 | 0,951453208 |

| DJ1         | DM-Histone-H3 | DM-K9-Histone-H3 | DUSP4       | E-Cadherin  | eEF2        | eEF2K       | EGFR        | EGFR_pY1173 | eIF4E       | eIF4E_pS209 |
|-------------|---------------|------------------|-------------|-------------|-------------|-------------|-------------|-------------|-------------|-------------|
| 1,158786545 | 0,978867184   | 1,124872792      | 1,134565628 | 1,1808459   | 1,194232448 | 0,857683052 | 1,201572786 | 0,95159528  | 1,072947362 | 0,959044531 |
| 1,198327219 | 1,24674163    | 1,341550787      | 0,790429848 | 1,801175199 | 1,077363279 | 1,022673739 | 1,136698087 | 0,98650542  | 0,943507446 | 0,956035749 |
| 0,87308216  | 0,859348889   | 1,052595139      | 0,570677023 | 0,092434432 | 0,723440718 | 0,811762264 | 1,023661592 | 1,151503808 | 0,605954477 | 0,944193822 |
| 0,808677842 | 1,043399199   | 1,010566332      | 0,986784734 | 0,761652238 | 0,864575423 | 0,848922012 | 0,955183024 | 0,989660337 | 0,787752059 | 0,958610867 |
| 0,943132865 | 1,038179371   | 1,090358702      | 1,131407192 | 1,329958384 | 0,99636624  | 1,006609374 | 1,160676215 | 0,968312919 | 0,925445599 | 0,997569902 |
| 0,868166191 | 0,978800311   | 1,00561982       | 1,411565467 | 0,974262653 | 0,791294984 | 0,8064532   | 1,273581292 | 0,996449798 | 0,711592366 | 0,901050179 |
| 0,937759193 | 1,229882697   | 1,298035438      | 1,131357371 | 1,508505265 | 1,061020457 | 1,02988088  | 1,111890951 | 1,066809816 | 1,079980081 | 0,971937903 |
| 0,85802021  | 0,923093424   | 1                | 0,6640873   | 0,382771605 | 1,037437814 | 0,957700516 | 0,994808894 | 1,140517092 | 1,021502107 | 1,073599126 |
| 1,313275279 | 1,250930154   | 1,302016257      | 0,919865829 | 1,254735772 | 1,183970927 | 0,930800861 | 1,118161304 | 1,071014854 | 1,525427502 | 0,96170535  |
| 1,233350171 | 1,277987103   | 1,253084749      | 1,35021207  | 1,228874164 | 1,006056502 | 0,875943936 | 1,103754937 | 0,954250371 | 1,015940657 | 1,057931529 |
| 1,28960445  | 1,096453764   | 1,051477773      | 1,298557958 | 0,961181881 | 1,077082755 | 0,78493774  | 0,956857195 | 0,905276688 | 1,189129776 | 1,057081636 |
| 0,981711664 | 1,061463312   | 1,073181293      | 0,937338428 | 1,008532155 | 1,012080788 | 0,903109697 | 0,997276586 | 0,986717165 | 1,139986926 | 0,961259521 |
| 1,270982153 | 0,783369934   | 0,877253135      | 1,007531213 | 1,905455396 | 0,792664911 | 2,053103477 | 1,352536015 | 0,964141036 | 0,826873836 | 0,895202354 |
| 1,364625996 | 0,889461945   | 0,991861714      | 0,743080386 | 0,768124783 | 0,760677067 | 1,213427416 | 0,94745712  | 0,962799011 | 0,754358537 | 0,934818361 |
| 1,212518742 | 0,847789747   | 0,943419519      | 0,849493569 | 1,218071128 | 1,026976188 | 1,034879119 | 1,230938952 | 1,045282665 | 0,825165791 | 0,898932849 |
| 0,742334088 | 0,993674652   | 1,146380569      | 0,931346261 | 1,338394499 | 0,964686943 | 0,99571023  | 1,244558631 | 1,061115433 | 0,971240509 | 0,836410578 |
| 1,178607983 | 0,881588416   | 0,882025439      | 1,056208321 | 1,226298395 | 0,850907713 | 1,051863815 | 1,114077002 | 0,954338256 | 0,887145853 | 0,837461628 |
| 1,206255841 | 0,942610213   | 1,042215613      | 0,935080026 | 1,50949452  | 1,011928725 | 0,890394325 | 1,040334284 | 1,023256396 | 1,15234593  | 0,981207932 |
| 1,098661217 | 0,97698689    | 1,016331836      | 0,87464069  | 1,529222172 | 0,817129519 | 0,854752015 | 1,055474498 | 1,040434166 | 0,965671722 | 0,997111608 |
| 0,912760796 | 0,902150393   | 0,973829524      | 0,854291159 | 0,980984919 | 0,791621303 | 0,985877437 | 1,009652404 | 1,049866485 | 0,859303746 | 0,884514508 |
| 0,689219241 | 1,093655086   | 1,080139716      | 0,700788623 | 0,968993754 | 1,028416901 | 0,906496949 | 0,960040701 | 1,003368391 | 1,233416037 | 0,965340216 |
| 1,279041327 | 0,778754238   | 0,816886547      | 1,092474827 | 0,25549001  | 0,614292997 | 1,41774034  | 0,910372655 | 0,946234515 | 0,502152986 | 0,949814838 |
| 0,974437355 | 0,776973889   | 0,87596045       | 1,133456376 | 0,850073525 | 1,828150787 | 0,999734615 | 0,966932709 | 0,97075509  | 1,11326491  | 1,028070973 |
| 0,930023773 | 1,025784289   | 1,034909685      | 1,067356774 | 1,349151774 | 1,069102306 | 0,906047827 | 1,096538851 | 1,042273732 | 1,203212725 | 0,990266875 |
| 1,2367623   | 1,224858699   | 0,971931065      | 1,721843353 | 0,888500872 | 0,701786993 | 1,608155822 | 0,93193392  | 0,918366682 | 0,433074134 | 1,256128208 |
| 0,775184714 | 1,248976985   | 0,88959639       | 1,714060662 | 1,217765089 | 0,693788313 | 1,845882574 | 0,999998924 | 0,898779416 | 0,561125829 | 1,246201557 |
| 2,175692268 | 1,255732627   | 0,718557078      | 1,535430576 | 0,351676173 | 0,45960962  | 1,558627721 | 0,715540739 | 0,977857936 | 0,391721541 | 1,204258998 |



| eIF4G       | Elk1_pS383  | ER          | ER-a_pS118  | ERCC5       | Ets-1       | FAK         | FAK_pY397   | FASN        | Fibronectin | FoxM1       |
|-------------|-------------|-------------|-------------|-------------|-------------|-------------|-------------|-------------|-------------|-------------|
| 1,315013646 | 0,928791664 | 0,919175582 | 1,012496168 | 0,924702287 | 0,897500837 | 0,849999366 | 0,911112828 | 1,360176881 | 0,638985218 | 0,956389904 |
| 1,431504612 | 0,90363113  | 1,066580732 | 1,071036268 | 0,912029905 | 1,001418681 | 0,981177295 | 0,893500385 | 1,061135918 | 0,510686146 | 0,918773117 |
| 0,481111903 | 1,435080806 | 1,432993438 | 0,972915058 | 1,803003043 | 1,265923565 | 1,167232966 | 1,012878956 | 0,336111395 | 3,14184878  | 1,0758361   |
| 0,701737018 | 1           | 0,842279874 | 0,958603573 | 1,096526263 | 0,894891944 | 0,592189025 | 1,06488503  | 0,757266569 | 4,023726701 | 1,009443613 |
| 1,23708784  | 1,009656335 | 0,826005727 | 1,07693309  | 1,201436495 | 0,91873935  | 0,896009694 | 1,033859784 | 0,857954345 | 0,610087608 | 0,989112629 |
| 1,06745528  | 0,878538737 | 0,98691606  | 1,060905892 | 1,078788353 | 1,046902972 | 1,099777003 | 0,789209671 | 0,691242972 | 0,984812536 | 0,894007474 |
| 1,332188708 | 0,981059606 | 0,89001465  | 1,111379608 | 0,926638896 | 1,03826658  | 0,959360201 | 0,971177957 | 1,043987445 | 2,24661883  | 1,012942802 |
| 1,242003361 | 1,000425105 | 0,881184811 | 1,109953601 | 0,912348101 | 0,800563464 | 0,94747494  | 1,134686946 | 0,927695963 | 2,023763514 | 0,749013376 |
| 1,079354609 | 0,925866824 | 0,870744695 | 1,081240609 | 0,866850284 | 0,881820409 | 1,021430464 | 1,128030369 | 1,002802969 | 0,803790761 | 0,920452437 |
| 1,015754048 | 0,901916493 | 0,949465159 | 1,033829801 | 0,985731004 | 0,952723122 | 0,865116865 | 0,989584838 | 0,758443443 | 1,1893404   | 1,252523204 |
| 0,893844666 | 0,920553181 | 1,050787538 | 0,828472596 | 0,821758286 | 1           | 0,838857793 | 0,922777908 | 1,221927868 | 1,092726455 | 1,062197781 |
| 1,070758025 | 1,073152631 | 0,989393874 | 0,97239421  | 0,880977828 | 0,956918684 | 0,976396295 | 1,311771699 | 0,917663922 | 2,054315063 | 0,989504245 |
| 0,913515991 | 1,004980034 | 0,986002608 | 0,970253317 | 0,895348989 | 0,961624318 | 0,742808953 | 1,060625921 | 0,559199902 | 0,567892936 | 1,223634694 |
| 0,586515788 | 1,014213514 | 1,39597075  | 0,811749309 | 2,039669873 | 1,165163655 | 1,171910758 | 1,055099531 | 0,600073137 | 0,86866115  | 0,968473072 |
| 1,049308134 | 0,910591915 | 1,088291486 | 0,908545509 | 1,626778971 | 1,085971585 | 0,904887701 | 0,768840475 | 0,583171847 | 0,926141112 | 0,953127235 |
| 0,964529409 | 1,141076938 | 1,115107235 | 0,980878313 | 1,062994268 | 1,077111957 | 1,033312789 | 0,966637089 | 0,843537342 | 3,082385077 | 0,922579843 |
| 0,775442132 | 0,911070767 | 1,021675499 | 0,969538787 | 0,974167561 | 0,975341607 | 0,877751763 | 0,984504773 | 0,74813353  | 2,08363982  | 1,19773172  |
| 1,107861159 | 1,022102191 | 0,869963023 | 1,135796472 | 0,9588583   | 0,880084106 | 0,824441948 | 1,165987317 | 0,979806119 | 0,937060677 | 0,962177777 |
| 1,198202529 | 1,075371223 | 0,82081471  | 1,091483729 | 0,908695733 | 0,892330032 | 0,810418515 | 1,755593074 | 0,824478588 | 3,074857993 | 1,302351482 |
| 0,748951433 | 1,234508518 | 1,008209983 | 0,980511458 | 0,997653816 | 1,008006538 | 1,111237372 | 1,292400372 | 0,53251362  | 1,619486766 | 1,189882783 |
| 1,060497804 | 1,187389535 | 0,873718443 | 0,925620616 | 0,991396898 | 0,860462281 | 0,791052713 | 1,222201535 | 1,215261159 | 2,425964719 | 0,817076861 |
| 0,441468568 | 1,078924065 | 1,385405254 | 0,87228443  | 1,284037723 | 1,174330375 | 1,14883508  | 1,10089117  | 0,450342168 | 1,043611817 | 1,099243877 |
| 0,876954142 | 0,904710302 | 0,952275344 | 0,867398504 | 0,989291151 | 1,086887459 | 0,890328885 | 1,134260787 | 1,020596331 | 1,557288478 | 0,926260438 |
| 1,091052344 | 0,997033984 | 1,0215505   | 0,984235713 | 0,935331683 | 0,959009569 | 1,086444692 | 1,359313882 | 0,875073151 | 0,776395861 | 0,946171035 |
| 0,771882222 | 1,266421447 | 1,178143079 | 1,018640234 | 1,856251941 | 1,016231296 | 1,349020309 | 1,382480254 | 4,092788879 | 0,168156724 | 1,621542176 |
| 1,179368564 | 0,906656204 | 1,186766968 | 1,15064117  | 1,473085515 | 0,954848358 | 1,093638483 | 1,326775825 | 4,474527914 | 0,189676912 | 1,518270734 |
| 0,511065174 | 0,975808903 | 1,280310171 | 1,259110064 | 1,281834569 | 1,164837493 | 1,247436959 | 1,815759712 | 4,007109025 | 0,397251237 | 1,169991856 |

| FoxO3a      | (p_S318-S321) | G6PD        | Gab2        | GATA6       | GCLM        | GCN5L2      | Glutamate-D1-2 | Glutaminase | Granzyme-B  | GSK-3a-b_pS21_S9 |
|-------------|---------------|-------------|-------------|-------------|-------------|-------------|----------------|-------------|-------------|------------------|
| 0,901597741 | 1,066827872   | 0,862699125 | 0,897094838 | 1,050870295 | 0,898350766 | 1,1937865   | 1,12985667     | 0,918771986 | 0,811095455 | 0,691021159      |
| 0,958584535 | 1,168062291   | 1,008756349 | 1,447456966 | 0,948374276 | 0,91644396  | 1,258503663 | 1,00001721     | 0,968517755 | 0,936931836 | 0,902155422      |
| 0,818162334 | 1,054353094   | 0,987818495 | 1,066693973 | 0,858195457 | 1,322310958 | 0,829126986 | 0,888883268    | 1,048129271 | 1,18080982  | 1,385143917      |
| 0,933632025 | 1,101101377   | 1,150403522 | 1,100954749 | 0,916842113 | 0,986074136 | 0,947809273 | 0,708719315    | 0,998690898 | 0,793881676 | 1,50702592       |
| 0,906799054 | 1,099650283   | 0,883506365 | 1,382565569 | 0,921090312 | 0,985499208 | 0,997213624 | 0,880065096    | 0,863894469 | 0,87848391  | 1,108181784      |
| 1,055114983 | 0,877271239   | 1,681225301 | 1,43174921  | 0,989914436 | 0,882319717 | 1,065266927 | 0,914925471    | 1,170732102 | 1,015226117 | 0,410957441      |
| 0,975838039 | 0,99259185    | 1,253963628 | 1,221446722 | 1,033404119 | 0,945422455 | 1,224326902 | 1,044474324    | 0,956249859 | 0,951662156 | 0,526581558      |
| 0,932026706 | 1,09818278    | 0,668416356 | 1,223675712 | 0,9286139   | 0,967358838 | 1,247681695 | 0,623187535    | 0,785281223 | 0,714220079 | 1,287444941      |
| 0,946216541 | 1,092511654   | 0,921212249 | 1,439950969 | 1,111246172 | 0,902600306 | 1,256146405 | 0,867030633    | 0,989479607 | 0,933395087 | 0,888799642      |
| 0,909596412 | 1,07413216    | 0,933749041 | 1,224913122 | 0,942323314 | 1,030651997 | 1,243890793 | 0,95360325     | 0,955508072 | 0,971399726 | 0,884698807      |
| 0,850032511 | 0,955947098   | 1,565894733 | 0,983676049 | 0,880669604 | 0,83855294  | 0,983755115 | 1,049600994    | 1,106631629 | 0,941383622 | 0,816755418      |
| 0,949908905 | 1,186122123   | 0,947147889 | 0,956511201 | 1,127800198 | 1,001886386 | 1,268325965 | 0,921341154    | 0,860333304 | 0,902823847 | 1,958136521      |
| 0,961061057 | 1,248565003   | 0,920703193 | 1,362716445 | 0,951449145 | 0,915666547 | 1,01945645  | 2,162940534    | 0,978541582 | 1,250460317 | 1,357101355      |
| 1,100010379 | 0,994256141   | 0,724254604 | 1,160020716 | 0,88407564  | 0,89774784  | 0,932631577 | 1,139202496    | 0,675765345 | 1,297127956 | 1,270951831      |
| 1,029912637 | 1,102051275   | 1,074838414 | 1,446878522 | 0,749885255 | 0,940204584 | 1,118437752 | 1,211839579    | 1,024608462 | 0,938852388 | 0,95277958       |
| 0,968156615 | 1,164011955   | 0,996253917 | 0,999852304 | 0,973447401 | 0,990839025 | 0,784586424 | 0,914287157    | 0,916296153 | 0,975513274 | 1,266448852      |
| 0,94778066  | 1,139643606   | 0,932636741 | 1,240236659 | 0,925582218 | 0,953922679 | 1,122368942 | 1,026021678    | 0,867336276 | 1,016276432 | 1,349874825      |
| 0,975482284 | 1,202325411   | 0,812790927 | 1,314537341 | 0,993192576 | 0,879637533 | 1,451514254 | 0,929867616    | 0,963157896 | 0,908987664 | 1,175853884      |
| 0,918333044 | 1,10938472    | 0,842979527 | 1,087249688 | 1,018403197 | 0,928626586 | 1,256626539 | 1,229956361    | 0,998948702 | 0,911892963 | 1,025274039      |
| 0,91134693  | 1,05863877    | 0,861723553 | 1,15607981  | 0,968961197 | 1,038574766 | 0,754682092 | 0,904914915    | 1,1259937   | 0,883702409 | 1,297753355      |
| 0,906312271 | 1,051127053   | 1,097989747 | 0,953414364 | 0,987925158 | 0,98879726  | 1,006578083 | 0,83827496     | 0,958541646 | 0,690056664 | 1,14512816       |
| 0,757416884 | 1,146116241   | 1,022005997 | 0,949632142 | 1,055934973 | 1,171734671 | 0,723000815 | 1,028268996    | 1,255968316 | 1,231467947 | 1,064061124      |
| 0,844499803 | 1,191855861   | 0,994043072 | 0,942512899 | 0,72364903  | 0,985770057 | 1,169243702 | 1,232068544    | 0,866810916 | 0,919459922 | 1,71652024       |
| 0,876530236 | 1,151499063   | 0,789705445 | 0,98288648  | 1,025803535 | 0,905126943 | 1,237446904 | 1,099329948    | 0,889537445 | 0,685651822 | 1,779251173      |
| 1,233995216 | 0,940445913   | 1,676687067 | 0,889995726 | 1,102013345 | 1,137606047 | 0,636658082 | 1,576716688    | 1,481445168 | 1,216564264 | 1,093685117      |
| 1,294522944 | 0,919634795   | 1,573606085 | 0,923422795 | 1,095621555 | 1,202187129 | 0,566606122 | 1,500861981    | 1,17254679  | 1,28969422  | 0,828930852      |
| 1,304979789 | 0,98342439    | 1,254560308 | 1,078957433 | 1,180977839 | 1,126641509 | 0,483814674 | 1,735537977    | 1,172077005 | 1,154635146 | 1,393437464      |

| Gys         | Gys_pS641   | HER2_pY1248 | HER3        | HER3_pY1289 | Heregulin   | HES1        | Hexokinase-II | Histone-H3  | HSP27_pS82  | HSP70       |
|-------------|-------------|-------------|-------------|-------------|-------------|-------------|---------------|-------------|-------------|-------------|
| 1,049553444 | 0,912156825 | 0,880815502 | 0,884828286 | 0,961465516 | 0,93640444  | 1,077403717 | 1,037911047   | 1,22001778  | 0,939253282 | 1,112679588 |
| 0,844165331 | 0,866946898 | 0,990160641 | 0,983648542 | 1,030672207 | 0,952395239 | 0,809917896 | 1,001226438   | 2,662414786 | 0,894575803 | 0,932270848 |
| 1,21987393  | 1,072448794 | 1,10876637  | 1,484306    | 0,767414859 | 1,434153907 | 0,419360607 | 0,718634537   | 1,496465702 | 0,844698135 | 0,907682163 |
| 1,007320755 | 0,975103388 | 1,050775444 | 1,280853226 | 1,11382633  | 1,18287408  | 1,244089979 | 0,85855306    | 1,169916162 | 0,970053719 | 0,952553888 |
| 0,664715364 | 0,77713048  | 0,933165559 | 0,900195261 | 1,035981783 | 0,923704098 | 0,76867998  | 0,989822396   | 1,338732214 | 0,652394744 | 1,368367939 |
| 1,111750411 | 0,481121078 | 0,883066606 | 0,838126108 | 0,938519546 | 0,881040265 | 1,067378181 | 1,02612275    | 0,976063789 | 0,99748292  | 1,132597454 |
| 1,135344858 | 0,962424844 | 0,860840157 | 1,067377639 | 1,006989346 | 0,969812391 | 1,069754361 | 1,035557024   | 2,341093702 | 0,839960816 | 1,124031043 |
| 0,698380774 | 0,797374758 | 1,018163452 | 1,407905109 | 0,932559287 | 1,012041851 | 1,366937767 | 0,879198959   | 1,025234274 | 1,301738925 | 1,036815655 |
| 1,146341684 | 0,966298915 | 0,96922283  | 0,976833932 | 1,017432209 | 0,873865846 | 1,0444836   | 1,048731176   | 2,384375199 | 0,867567823 | 1,003874303 |
| 0,892455423 | 0,759585658 | 0,908613967 | 0,968688977 | 0,968733251 | 1,125811622 | 0,805680283 | 0,865283519   | 2,806149312 | 1,078158241 | 1,393004257 |
| 1,400956904 | 1,059079115 | 1,043517303 | 0,823095885 | 0,971626627 | 1,058936126 | 0,892684904 | 0,971185871   | 1,801946445 | 1,029442695 | 1,089175622 |
| 1,124275213 | 1,055995129 | 0,966861816 | 1,133788507 | 1,10311801  | 0,958599037 | 1,55699793  | 1,008102205   | 1,253090979 | 1,188652082 | 1,037963847 |
| 1,277333889 | 1,302415552 | 0,964090472 | 0,883100806 | 0,878585465 | 1,040181211 | 1,617557388 | 0,923854649   | 0,759847755 | 1,14313598  | 1,405227004 |
| 0,823143347 | 0,905028826 | 1,011140482 | 0,827822295 | 0,734091245 | 0,913513276 | 0,705536722 | 0,911936696   | 0,961027066 | 1,132178095 | 1,044516333 |
| 0,767520394 | 0,797088908 | 0,986711084 | 0,853146173 | 0,957002476 | 0,938481006 | 0,709569531 | 0,910887351   | 0,868763684 | 0,905011353 | 1,396334472 |
| 1,113416322 | 0,99084064  | 0,974324246 | 1,128950934 | 1,097691236 | 0,975598209 | 1,159368665 | 0,93079763    | 1,595164904 | 1,000684715 | 1,195933591 |
| 0,712309505 | 0,796682039 | 0,920527336 | 0,856662947 | 0,857539165 | 0,883532215 | 0,894518249 | 1,029361004   | 0,86242617  | 0,729330624 | 1,043986359 |
| 0,837097866 | 0,84783119  | 1,024445437 | 1,08257963  | 1,098052884 | 0,970678368 | 1,28916537  | 1,009809612   | 1,24571197  | 1,09490544  | 0,88781933  |
| 0,976976142 | 0,937050161 | 0,972646824 | 1,167741083 | 1,065121575 | 0,853860466 | 1,422997855 | 1,070327135   | 1,110867521 | 0,909579342 | 0,982042285 |
| 1,072038642 | 0,97493016  | 1,090763259 | 0,969075738 | 0,918760183 | 1,155774217 | 0,86601182  | 0,790144439   | 0,835191611 | 1,090605189 | 0,924861029 |
| 1,565989929 | 1,257089509 | 1,05838967  | 1,177215174 | 0,934570495 | 1,103503965 | 0,784392362 | 0,872096652   | 1,277608193 | 1,128533906 | 0,994319884 |
| 1,492175916 | 1,305283752 | 1,192899607 | 0,86454857  | 0,840609718 | 1,631194536 | 0,930184677 | 0,980971489   | 0,514521982 | 1,575046179 | 1,142688074 |
| 1,235004077 | 1,32034671  | 1,056364255 | 0,883314458 | 1,107413546 | 0,956158688 | 1,145716187 | 0,857246369   | 0,8072434   | 1,03643598  | 1,288727412 |
| 0,875014599 | 0,959230458 | 1,044121807 | 0,932384243 | 1,004894781 | 0,949499318 | 1,021790231 | 0,922599835   | 1,304230865 | 1,132942633 | 0,932180442 |
| 2,259451543 | 2,335791098 | 1,271574984 | 0,739396843 | 0,622853087 | 1,175690431 | 0,569550895 | 1,368664499   | 0,664237015 | 1,184192211 | 0,905364527 |
| 0,449639446 | 1,012904335 | 1,185334111 | 0,787473723 | 0,653591857 | 0,851441618 | 0,546606881 | 1,434873682   | 0,54678543  | 1,444092626 | 0,884021139 |
| 4,680427801 | 3,198836313 | 1,034126057 | 0,771868563 | 0,586678519 | 0,970144416 | 0,560971008 | 1,373071068   | 0,359652797 | 2,593680618 | 0,92640376  |

| IGF1R_pY1135_Y1136 | IGFBP2      | IGFRb       | INPP4b      | IR-b        | IRF-1       | IRS1        | Jagged1     | Jak2        | JNK2        | JNK_pT183_Y185 |
|--------------------|-------------|-------------|-------------|-------------|-------------|-------------|-------------|-------------|-------------|----------------|
| 0,963931986        | 0,92379931  | 1,118917668 | 1,0448453   | 1,270201311 | 0,553958262 | 0,927650127 | 0,939114462 | 0,969747864 | 0,951161215 | 1,043682722    |
| 1,021453312        | 0,872290119 | 0,835360768 | 0,965240912 | 1,104968655 | 1,082058033 | 1,017348773 | 0,925626139 | 1,013758681 | 0,98557421  | 1              |
| 1,162504905        | 0,828774673 | 0,533480543 | 1,120922497 | 0,644759668 | 1,918551167 | 0,716596994 | 1,024424025 | 0,802834607 | 0,859621301 | 1,112814       |
| 1,080143575        | 0,868889    | 1,301601865 | 0,818984233 | 1,034532518 | 0,659931484 | 0,837298829 | 1,069097911 | 0,876487686 | 0,944514823 | 1,074612049    |
| 0,970188433        | 1,150275299 | 0,756279705 | 0,88901078  | 1,341806106 | 0,56595326  | 0,95242923  | 1,012765276 | 0,928450809 | 1,159680605 | 1,003904903    |
| 0,877354978        | 1,269866479 | 1,452017158 | 0,937184406 | 1,278371861 | 1,119535041 | 1,296444175 | 1,115800533 | 1,011326477 | 1,063537695 | 0,959421681    |
| 1,067667841        | 1,142819143 | 1,111790125 | 0,9839931   | 0,990486375 | 0,808119453 | 1,147630918 | 1,07240334  | 0,950401572 | 1,08720175  | 0,986865068    |
| 0,954165613        | 1,010408929 | 0,95248368  | 0,914036757 | 1,360853339 | 0,939810194 | 0,82629378  | 1,180976687 | 0,969078335 | 1,023857414 | 1,096938095    |
| 0,938719242        | 0,755582094 | 1,232725539 | 0,974572996 | 1,13754664  | 0,556858048 | 0,970806042 | 1,012934621 | 1,038561293 | 1,359068546 | 1,0215221      |
| 0,966056992        | 0,79750487  | 0,805272496 | 0,95819623  | 0,901102259 | 0,928225548 | 0,862076919 | 1,040696842 | 0,907634442 | 0,934841786 | 1,134407058    |
| 1,059504942        | 1,04144079  | 1,007749889 | 1,013784271 | 0,978239122 | 0,870678058 | 1,114802495 | 1,083470601 | 0,805547636 | 0,852227254 | 1,012905704    |
| 0,995843934        | 0,963002227 | 1,211403073 | 0,983085582 | 1,064259559 | 0,798710475 | 0,983491198 | 0,898328555 | 1,006107665 | 0,920754567 | 0,999376526    |
| 0,957423517        | 1,261185007 | 0,958211153 | 0,957106138 | 0,70954048  | 0,877429377 | 1,492749821 | 1,226763997 | 0,900631192 | 1,152904876 | 0,925821638    |
| 1,002288526        | 0,853580314 | 0,677575895 | 0,980781739 | 1,034168628 | 1,98927273  | 0,82836314  | 1,026830808 | 1,19411814  | 1,036337537 | 0,777725833    |
| 0,954133456        | 1,247558459 | 0,876179937 | 1,006795231 | 1,000973438 | 1,231129041 | 0,924115175 | 1,091773311 | 1,009398444 | 1,364150661 | 0,962196962    |
| 1,052543359        | 0,981464204 | 1,370088633 | 0,94895571  | 1,150889796 | 1,535115584 | 1,164225847 | 1,175353185 | 0,92811749  | 1,173717395 | 0,974234248    |
| 0,903655851        | 1,302509131 | 0,859421749 | 0,945713313 | 0,797275325 | 1,384146743 | 0,835483473 | 1,017524779 | 1,21955427  | 1,055037163 | 0,901517753    |
| 0,967541244        | 1,095456044 | 1,097375448 | 0,940743835 | 1,423881331 | 0,893387601 | 1           | 0,977888114 | 1,008598394 | 1,022155264 | 0,998915299    |
| 0,90141113         | 1,366950633 | 1,788587117 | 0,876742689 | 1,159226958 | 0,622912602 | 1,557932847 | 0,904098381 | 0,881008494 | 1,074386877 | 0,987007988    |
| 0,886185341        | 0,840436618 | 0,665484153 | 1,04589034  | 1,061192462 | 1,585358273 | 1,043955287 | 1,071097656 | 0,874384376 | 0,931888388 | 1,080535863    |
| 1,183872221        | 1,040942093 | 1,554702125 | 0,946109101 | 1,144815303 | 0,784516802 | 1,155937307 | 1,049671766 | 0,727778839 | 0,973458081 | 1,106853163    |
| 0,647322797        | 0,84751295  | 0,809757781 | 0,799420333 | 0,557675987 | 1,850275641 | 1,036500161 | 1,050319517 | 0,685915834 | 0,918428833 | 1,123888467    |
| 0,96118929         | 1,007587289 | 1,32437168  | 0,960691493 | 1,322298011 | 0,776419454 | 0,986191527 | 1,178575567 | 0,975283997 | 1,078187509 | 1,010337627    |
| 0,947374952        | 0,968348853 | 1,054096575 | 0,94938241  | 0,944110901 | 1,125254471 | 0,892711659 | 0,939067779 | 1,098573084 | 0,827778051 | 1,023730441    |
| 0,999978627        | 1,775840653 | 0,557664773 | 1,142153027 | 0,602214575 | 1,026728239 | 1,048016453 | 0,928902599 | 0,814247378 | 1,00724012  | 0,917856046    |
| 0,943185006        | 2,00300738  | 0,619963882 | 1,049725145 | 0,843976675 | 1,305874705 | 1,010253937 | 0,913703925 | 0,736708794 | 1,188324236 | 0,919718834    |
| 0,837474262        | 1,442790049 | 0,854735613 | 0,808369267 | 0,781304954 | 2,242135912 | 1,072428007 | 1,109107894 | 0,663609414 | 1,259740658 | 0,799734069    |

| LC3A-B      | Lck         | LDHA        | LRP6_pS1490 | MAPK_pT202_Y204 | Mcl-1       | MCT4        | MDM2_pS166  | MEK1        | MEK1_pS217_S221 | MERIT40_pS29 |
|-------------|-------------|-------------|-------------|-----------------|-------------|-------------|-------------|-------------|-----------------|--------------|
| 1,016596909 | 0,885767516 | 0,869384814 | 1,048477911 | 0,83850575      | 1,151420529 | 0,82126549  | 1,108763364 | 0,869384814 | 1,044813711     | 1,304845059  |
| 1,005151876 | 0,902048348 | 0,915806141 | 1,184701776 | 0,979580984     | 1,16249644  | 0,819572802 | 1,198002682 | 0,915806141 | 1,034264492     | 0,896479757  |
| 1,042034595 | 1,151972966 | 1,131397804 | 0,915404526 | 1,216246678     | 0,851800991 | 1,032275686 | 1,147323453 | 1,131397804 | 0,989569788     | 0,742595883  |
| 0,966847506 | 1,005554761 | 1,183189393 | 1,00374454  | 0,880557902     | 1,033932272 | 1,250478339 | 1,058672487 | 1,183189393 | 0,887381809     | 0,954026931  |
| 1,027405586 | 0,839653052 | 0,848996338 | 1,112814821 | 0,955480323     | 1,145188583 | 0,905586643 | 1,232204826 | 0,862211    | 1,00446864      | 1,198959903  |
| 1,056348237 | 1,112785576 | 1,135767418 | 0,875504298 | 0,821955909     | 1,091971785 | 0,726444898 | 0,969303943 | 1,096790164 | 0,969348781     | 1,053487122  |
| 1,081734361 | 0,786156445 | 1,086739658 | 0,945014959 | 0,915902103     | 0,924418962 | 1,820403696 | 1,170418073 | 1,043445781 | 1,02749216      | 1,266963878  |
| 1,463200215 | 0,900908735 | 1,334799989 | 1,185050057 | 1,121479187     | 1,28081049  | 0,729754806 | 1,280730006 | 1,334799989 | 0,943429961     | 0,828436327  |
| 0,974136547 | 0,738884506 | 0,890984391 | 1,126405627 | 0,99516408      | 1,037871882 | 1,333516685 | 1,14382713  | 0,890984391 | 0,994462257     | 1,168420846  |
| 0,80752977  | 0,907238272 | 0,785632569 | 1,188061876 | 0,817520837     | 1,058113097 | 0,888123118 | 1,275200072 | 0,785632569 | 1,069930987     | 1,293506319  |
| 1,030438573 | 1,028336138 | 1,057420285 | 0,915345123 | 0,710592619     | 1,090110597 | 1,248438406 | 1,020564627 | 1,057420285 | 0,933839677     | 1,091115161  |
| 1,054678755 | 0,774833272 | 0,983226513 | 1,259468263 | 0,77281965      | 0,988400034 | 1,310090949 | 0,967594158 | 0,983226513 | 1,013363605     | 0,95744768   |
| 0,899527221 | 1,098748589 | 1,014984308 | 1,003209526 | 1,052165366     | 0,862560416 | 1,219696529 | 1,536644662 | 0,807683589 | 0,976462539     | 0,951256664  |
| 1,144694392 | 1,885135421 | 1,129335468 | 0,917461689 | 1,103159538     | 1,101256611 | 0,653760379 | 1,11343885  | 1,129335468 | 0,859267552     | 0,997598155  |
| 0,886423506 | 2,199748293 | 0,898645048 | 0,883457115 | 0,966349494     | 1,256514998 | 0,948383889 | 1,349374821 | 0,898645048 | 1,006786467     | 0,887397156  |
| 0,869098332 | 1,159105238 | 1,175731916 | 1,031610618 | 0,962005452     | 0,900458485 | 1,165852724 | 1,21881748  | 1,027307626 | 1,000894361     | 0,980712202  |
| 0,963081945 | 2,103376533 | 1,01918828  | 0,972094316 | 0,894959895     | 1,361053413 | 0,862770718 | 1,261251753 | 1,13269813  | 0,924878699     | 1,238479606  |
| 0,865646656 | 0,940189671 | 0,962329745 | 1,278523212 | 0,914833746     | 1,058402092 | 0,771056497 | 1,440844198 | 1,089089241 | 1,006411906     | 0,858158343  |
| 0,798177965 | 0,819176658 | 1,147273455 | 1,133317016 | 0,892235972     | 0,833849803 | 1,013930337 | 1,243769725 | 0,952476186 | 0,992651857     | 1,224457287  |
| 1,023229574 | 1,422399248 | 1,374071717 | 1,180736139 | 1,386290818     | 1,151854266 | 1,113049522 | 1,206570261 | 1,374071717 | 0,906465244     | 0,822086188  |
| 0,839048184 | 0,774319328 | 1,263434755 | 1,022540642 | 1,044477473     | 0,841086968 | 1,018098587 | 1,100169927 | 1,263434755 | 0,894184307     | 0,856249723  |
| 0,845222597 | 1,081525886 | 1,975982845 | 1,017053746 | 0,928588083     | 0,489001617 | 0,664428242 | 1,64166588  | 1,975982845 | 0,847015803     | 1,131124506  |
| 0,848287935 | 1,391947118 | 0,986457081 | 1,009421501 | 1,091100996     | 1,126334386 | 1,224691436 | 1,286112066 | 0,986457081 | 1,127873873     | 1,001764457  |
| 0,9625595   | 0,963506501 | 0,949246349 | 1,229314228 | 1,040483671     | 1,359925997 | 0,859221623 | 1,223987627 | 0,949246349 | 1,053270679     | 0,961127593  |
| 1,019820933 | 0,738949496 | 2,308844355 | 0,904300636 | 1,126056858     | 0,799888882 | 1,417064891 | 1,037066888 | 1,616932156 | 0,935498267     | 2,183517967  |
| 1,333954614 | 0,809330251 | 2,358333435 | 1,043090689 | 1,169290259     | 0,818378624 | 1,161325827 | 0,970583001 | 1,387126502 | 0,824946081     | 2,046556959  |
| 1,045217648 | 0,885887247 | 2,172345353 | 0,971344361 | 1               | 0,766228873 | 1,194233298 | 1,861534973 | 2,172345353 | 0,944579122     | 1,805303095  |

| Merlin      | MIF         | MMP2        | Mnk1        | MSH6        | MSI2        | mTOR        | mTOR_pS2448 | Myosin-Heavy-Chain-11 | Myosin-IIa_pS1943 | Myt1        |
|-------------|-------------|-------------|-------------|-------------|-------------|-------------|-------------|-----------------------|-------------------|-------------|
| 1,03751251  | 1,149713758 | 0,973275109 | 1,128837875 | 0,982119569 | 0,693055984 | 0,861570616 | 0,821734848 | 0,403735669           | 0,869384814       | 1,234192718 |
| 0,995490948 | 1,113588887 | 0,965066948 | 0,911186994 | 0,935187317 | 1,070011893 | 1,078506472 | 1,128140308 | 0,730576205           | 0,915806141       | 1,068370079 |
| 0,648548317 | 1,072290329 | 1,122300606 | 1,122813984 | 1,137537326 | 1,578551081 | 0,590048366 | 0,71980694  | 0,96472008            | 1,131397804       | 0,854119208 |
| 0,756151871 | 1,090551006 | 0,981613247 | 0,923406009 | 0,763634361 | 0,664184651 | 0,882477372 | 1,053144636 | 0,562265312           | 1,183189393       | 0,980670075 |
| 1,010056076 | 1,101487302 | 0,984294037 | 0,927597154 | 0,880109369 | 0,760307666 | 1,200339515 | 1,23571096  | 0,777282889           | 0,787643965       | 1,080601003 |
| 1,095315426 | 1,13719021  | 1,060617971 | 0,834105223 | 0,935286045 | 1,166767292 | 1,045391202 | 0,55068598  | 0,849224258           | 1                 | 0,982141244 |
| 1,024839771 | 1,260168452 | 1,034600162 | 0,794347893 | 1,014484928 | 0,933539324 | 0,919161781 | 0,895221291 | 0,596763241           | 0,92930878        | 1,055481091 |
| 0,838804167 | 0,990723614 | 0,951788203 | 0,915705594 | 0,856345741 | 0,947212535 | 0,919727337 | 1,168166678 | 2,061934568           | 1,334799989       | 0,99005854  |
| 0,91433929  | 1,173729332 | 1,006507122 | 1,10545649  | 0,717910516 | 0,757392655 | 1,292729048 | 1,233071109 | 0,627770097           | 0,890984391       | 0,982947778 |
| 0,985547263 | 1,157995568 | 1,002287254 | 1,008128755 | 0,98186677  | 0,953592911 | 1,06019205  | 1,241291848 | 0,750225754           | 0,785632569       | 1,055727339 |
| 0,991616213 | 0,952495523 | 1,040752837 | 0,868726738 | 0,70049341  | 0,908338862 | 0,91703514  | 1,096206965 | 0,779137564           | 1,057420285       | 1,058619781 |
| 1,053807078 | 1,120425576 | 0,991132315 | 1,059341681 | 0,715004147 | 0,827346964 | 1,21683839  | 1,492230125 | 0,677870868           | 0,983226513       | 0,934189644 |
| 1,030283376 | 1,176565544 | 1,086355333 | 0,99356685  | 3,924871729 | 0,947910306 | 1,187289289 | 1,316581941 | 293,953477            | 0,807683589       | 0,958901751 |
| 0,756216424 | 0,962107244 | 0,984056791 | 1,537193431 | 0,935614489 | 1,675197774 | 1,139486153 | 1,206208147 | 44,2788609            | 1,129335468       | 0,833273967 |
| 1,00019248  | 1,188772743 | 1,022399616 | 1,366860214 | 2,585263415 | 1,094647926 | 1,031688935 | 1,103638782 | 0,91046629            | 0,898645048       | 0,873332338 |
| 0,973019207 | 1,062750423 | 0,928861834 | 1,040296935 | 2,69226294  | 1,459380535 | 1,032375478 | 1,134423417 | 1,541905634           | 0,943653081       | 0,942582638 |
| 1,045170696 | 1,022031413 | 0,896868186 | 1,337127623 | 0,967247994 | 1,263269725 | 1,146580675 | 1,209068259 | 1,400705465           | 0,792985253       | 1,082044535 |
| 1,060305964 | 1,13570824  | 0,840383812 | 0,829789602 | 0,931275709 | 0,97184603  | 1,183455308 | 1,300026684 | 0,897814869           | 0,92304201        | 0,975240498 |
| 0,998526719 | 1,038380144 | 0,92929718  | 0,979547986 | 1,05016363  | 0,743034861 | 1,373822306 | 1,225270929 | 0,736000694           | 0,768032445       | 1,071773289 |
| 0,692752814 | 1,051117456 | 1,067968165 | 1,122117228 | 1,434054949 | 1,322960741 | 0,898492659 | 1,135960792 | 2,259755987           | 1,374071717       | 0,840245285 |
| 0,787547699 | 1,110822385 | 0,971678011 | 0,869478482 | 1,096220722 | 0,701910056 | 0,776379959 | 0,831855449 | 0,568761838           | 1,263434755       | 0,843992393 |
| 0,8487584   | 1,125991923 | 1,29622275  | 0,817091091 | 1,267698912 | 1,834875694 | 0,551403819 | 1,112234555 | 48,93540834           | 1,975982845       | 0,973308101 |
| 1,259191414 | 0,889794665 | 1,159860933 | 1,222103834 | 0,74393369  | 0,840389308 | 1,184350194 | 1,482776579 | 0,893805317           | 0,986457081       | 1,058141566 |
| 0,92436426  | 0,998837708 | 1,064737325 | 1,092076723 | 0,763446037 | 0,944925041 | 1,028471065 | 1,284120262 | 3,434426202           | 0,949246349       | 1,016528998 |
| 0,793812301 | 0,90031492  | 1,310251797 | 1,096512735 | 1,321978612 | 0,959693404 | 0,628429658 | 0,596420497 | 53,01071797           | 1,091009894       | 1,265529892 |
| 0,775251859 | 0,93444739  | 0,757793186 | 1,09712442  | 1,075639824 | 1,290874647 | 0,682866547 | 0,63399926  | 95,82640676           | 1,014495827       | 1,193220269 |
| 0,765132672 | 0,912884651 | 1,042414284 | 1,112747295 | 1,393675986 | 2,187407395 | 0,702759816 | 0,802231146 | 16,46188768           | 2,172345353       | 1,242895045 |

| N-Cadherin  | NAPSIN-A    | NDRG1_pT346 | NF-kB-p65_pS536 | Notch1      | Notch3      | Oct-4       | P-Cadherin  | Met_pY1234_Y1235 | p16INK4a    | p21         |
|-------------|-------------|-------------|-----------------|-------------|-------------|-------------|-------------|------------------|-------------|-------------|
| 0,907799347 | 0,973576468 | 0,79509645  | 0,948961674     | 1           | 1,017497131 | 1,024863341 | 0,942904386 | 0,86306001       | 0,961996733 | 1,017507133 |
| 0,973027481 | 1,007002379 | 1,037041584 | 1,146008476     | 1,046111106 | 1,095624577 | 0,969151423 | 0,925533572 | 1,259823078      | 0,889588549 | 0,839609133 |
| 1,128563764 | 1,102349088 | 1,853542962 | 1,088130609     | 0,675142002 | 0,930640199 | 1,165805125 | 0,972959818 | 0,745570797      | 0,839365216 | 1,565781587 |
| 1,067989265 | 1,094834181 | 1,276789683 | 0,971865969     | 0,782353788 | 0,943025734 | 1,006261273 | 0,826551652 | 2,178987282      | 1,022471585 | 1,064812813 |
| 1,011702018 | 1,103925844 | 1,965841759 | 1,120874005     | 1,1067517   | 1,010170594 | 0,919543957 | 1,018181294 | 1,119070998      | 0,858782276 | 0,928399324 |
| 1,059056908 | 0,963235048 | 0,223060666 | 0,769441403     | 1,182131487 | 1,143240774 | 0,946515225 | 1,363329143 | 0,651302121      | 1,219062202 | 0,718953697 |
| 1,033021531 | 0,956636148 | 0,437450177 | 0,953803798     | 1,055690299 | 1,062365413 | 1,091402215 | 4,906684496 | 0,81571637       | 1,161619179 | 0,904392176 |
| 0,829681267 | 1,046023833 | 1,016594839 | 0,890395453     | 1,064756082 | 1,079863962 | 0,982687357 | 0,830893411 | 1,200115414      | 1,751598668 | 0,778110096 |
| 1,000464373 | 0,980514317 | 0,858018913 | 1,191543113     | 1,288407824 | 1,003072351 | 1,012298263 | 1,048919823 | 1,058455889      | 1,045831542 | 1,003089591 |
| 0,909051369 | 1,221088642 | 0,813586932 | 1,012389533     | 1,105182806 | 1,081472695 | 0,900841132 | 0,930706282 | 0,970877698      | 0,834594324 | 1,119815175 |
| 0,773120387 | 1,038635719 | 1,07113835  | 0,679689717     | 0,95690224  | 0,996721122 | 0,892515956 | 0,98260267  | 1,341926824      | 0,707425305 | 0,970614531 |
| 0,95579699  | 1,013583929 | 4,263460592 | 1,162643647     | 1,519635807 | 1,028080198 | 1,065304767 | 0,828990683 | 1,309547091      | 0,990388862 | 1,094576667 |
| 1,064712874 | 0,832386951 | 3,092039389 | 1,176192395     | 1,419396838 | 1,012187557 | 1,154055967 | 0,984336702 | 0,58853928       | 1,223978673 | 1,103101172 |
| 1,015736434 | 0,988981791 | 1,824356781 | 0,95377778      | 0,678513889 | 0,859364357 | 0,870258076 | 1,117339989 | 0,716201694      | 1,003427054 | 1,082366171 |
| 1,125206266 | 0,940852936 | 0,806455932 | 1,0359667       | 1,021818085 | 0,954354645 | 0,949240901 | 1,009225813 | 0,714329755      | 1,301210833 | 1,031447067 |
| 1,104480377 | 0,978191195 | 0,992806635 | 1,016962123     | 0,974135976 | 1,038970594 | 0,997738332 | 0,997932073 | 1,02851646       | 0,955780344 | 1,065241189 |
| 0,955668465 | 0,885252719 | 1,239907315 | 1,003167472     | 0,821784747 | 0,968734446 | 0,848813703 | 0,987063282 | 1                | 1,010181649 | 1,002102525 |
| 1,021315252 | 0,974631284 | 0,911067254 | 1,13074306      | 1,352469788 | 1,066106916 | 0,938624442 | 1,002691509 | 2,169154008      | 1,286469942 | 0,915226086 |
| 0,937030539 | 0,873530636 | 2,907642321 | 1,045596523     | 1,149661115 | 1,064479338 | 0,915168472 | 0,924959992 | 1,565514032      | 0,96122835  | 0,983720813 |
| 0,89904873  | 0,936569616 | 1,233875876 | 1,066275166     | 0,776236804 | 0,881457611 | 0,989948672 | 0,958808888 | 1,384068135      | 0,901430696 | 1,201051312 |
| 1,058104217 | 0,916716498 | 1,700215217 | 0,958151361     | 0,717088013 | 1,071836673 | 1,242105947 | 0,854592288 | 1,791343887      | 1,032509594 | 1,165574036 |
| 1,067797812 | 1,112082481 | 0,738916296 | 0,863158239     | 0,927703565 | 0,998451823 | 0,824400179 | 1,06122827  | 0,677758136      | 0,651896838 | 1,319589666 |
| 0,903858192 | 1,00398102  | 2,48537846  | 1,03821956      | 0,954591485 | 0,941456022 | 0,840536698 | 0,811435509 | 1,659748136      | 1,428397803 | 0,994809977 |
| 0,951624118 | 0,987503795 | 2,865911183 | 1,402400334     | 1,049430406 | 1,007686779 | 0,970289301 | 0,760481005 | 2,391643494      | 0,854931408 | 1,031506238 |
| 1,071768342 | 0,939051762 | 0,597728308 | 0,953890966     | 0,870326248 | 0,713957167 | 0,909711289 | 1,369907476 | 0,515514337      | 0,925537199 | 1,242135556 |
| 1,172725615 | 0,975041807 | 0,943079948 | 0,987755422     | 0,926425268 | 0,701990652 | 0,820700543 | 1,372288938 | 0,587825193      | 1,007105696 | 1,325567322 |
| 1,140698638 | 1,035748683 | 0,871193254 | 0,929858271     | 0,679714688 | 0,793507415 | 0,976925792 | 1,377748187 | 0,595376807      | 0,766191185 | 1,345371701 |

| p27-Kip-1   | p27_pT198   | p38-MAPK    | p38_pT180_Y182 | p44-42-MAPK | p53         | p70-S6K1    | p70-S6K_pT389 | p90RSK_pT573 | PAICS       | PAK1        |
|-------------|-------------|-------------|----------------|-------------|-------------|-------------|---------------|--------------|-------------|-------------|
| 1,190345081 | 1,002265522 | 1,077699534 | 0,833320185    | 1,292901327 | 0,865302841 | 1,197179028 | 0,934396381   | 0,772600576  | 0,952102266 | 1,234695402 |
| 1,091079005 | 0,985696935 | 0,888347247 | 0,832207757    | 0,973948692 | 0,928490451 | 1,26391758  | 1,004805496   | 1,189734178  | 0,886093897 | 1,230010481 |
| 1,158365499 | 1,04261697  | 1,140975333 | 1,201438516    | 1,034464335 | 0,943192027 | 0,772760315 | 0,99225317    | 1,250976373  | 0,643075627 | 0,410232093 |
| 1,053079568 | 0,815422732 | 1,124187285 | 1,306894909    | 1,079922135 | 1,019157169 | 1,055113804 | 0,938158931   | 1,153141893  | 1,167255232 | 0,893610747 |
| 1,033752677 | 1,054208295 | 0,765418108 | 1,235068809    | 0,871681366 | 0,980506143 | 1,142275115 | 0,866083708   | 1,189787695  | 0,839677295 | 1,402834747 |
| 0,977798364 | 0,999297093 | 1,160184448 | 0,622388247    | 1,081683503 | 0,996776382 | 0,907793265 | 0,845216009   | 0,656453291  | 1,060063034 | 1,080809485 |
| 1,075803191 | 0,951816539 | 0,944173265 | 0,659301593    | 1,025279428 | 1,004180217 | 1,217480884 | 0,830452832   | 0,727665148  | 1,019358437 | 1,009798919 |
| 0,964672675 | 0,863882333 | 1,323500617 | 1,62588548     | 1,045439333 | 0,873363501 | 1,385971798 | 0,850441212   | 0,952185465  | 0,773752029 | 0,979383042 |
| 1,034721643 | 0,925828571 | 0,905065204 | 0,876004019    | 0,987781236 | 0,945561891 | 1,599210891 | 0,952486271   | 0,862107253  | 0,942569872 | 1,305920003 |
| 0,993543645 | 1,089405585 | 0,901545114 | 0,91165953     | 0,775354686 | 1,029107524 | 1,105469577 | 0,857640748   | 1,041399905  | 1,231711414 | 0,91963244  |
| 0,98053013  | 0,945363281 | 0,954985921 | 0,734018303    | 1,030084202 | 1,054366375 | 1,059691858 | 0,876009136   | 0,810063586  | 1,446722616 | 1,068952783 |
| 0,997545257 | 0,994949834 | 0,918742506 | 0,89838299     | 1,044275794 | 1,068647162 | 0,881361461 | 0,971984724   | 1,655171137  | 0,996467749 | 0,968477876 |
| 1,209692285 | 1,001808189 | 1,0205517   | 1,394657467    | 0,868331536 | 0,955915983 | 0,981324799 | 1,190778117   | 1,915563815  | 0,83200736  | 1           |
| 1,097568087 | 0,875278987 | 1,535768128 | 1,379069371    | 1,214359835 | 0,984495828 | 1,041222959 | 1,131302756   | 1,301401162  | 0,831883895 | 0,904739487 |
| 0,962570393 | 0,987598496 | 1,431768424 | 1,358779443    | 1,04563897  | 0,901240404 | 1,013868091 | 1,061192529   | 0,887868979  | 0,846051552 | 1,102833857 |
| 1,113005285 | 0,944316381 | 1,066999107 | 1,210224245    | 1,032252817 | 1,034859911 | 0,957240643 | 0,98275118    | 0,832522467  | 1,244192116 | 1,035029733 |
| 1,038465501 | 0,942059389 | 1,273524052 | 1,216055752    | 0,906916481 | 1,05340187  | 1,324021585 | 1,199228823   | 1,038875808  | 1,19282651  | 0,833116892 |
| 1,094562739 | 0,991611446 | 0,998069986 | 1,096236719    | 0,913355671 | 1,024469336 | 1,536117087 | 0,921434083   | 1,140329788  | 1,279773485 | 1,036151865 |
| 1,097141178 | 0,977933568 | 0,998056545 | 0,822735812    | 0,881888125 | 0,91308238  | 0,965690224 | 0,96678597    | 0,97837733   | 1,391149104 | 0,882311698 |
| 0,940378634 | 0,790123076 | 1,206430882 | 1,397174372    | 0,999973953 | 0,910973263 | 0,957080164 | 0,955176258   | 1,387492697  | 0,996390458 | 0,80930932  |
| 1,027761835 | 0,817573969 | 0,762090541 | 0,784691504    | 0,983714136 | 0,944371054 | 1,159850771 | 0,916701051   | 0,934334455  | 1,134615185 | 1,379674925 |
| 0,787135488 | 1,050038394 | 0,670720232 | 1,532348151    | 0,375274943 | 1,040188475 | 0,516417739 | 0,941450088   | 1,956682813  | 0,838780161 | 0,437790981 |
| 0,972091291 | 0,99729365  | 1,258597383 | 1,820232192    | 1,126191685 | 0,891111148 | 1,022955741 | 1,022639112   | 1,991901058  | 1,395983007 | 0,975698527 |
| 1,00102756  | 0,962585282 | 0,968945351 | 1,100929859    | 0,959207674 | 1,040963917 | 0,947207158 | 1,024858901   | 1,440027058  | 1           | 0,920104829 |
| 0,902034538 | 1,043460912 | 0,513241217 | 0,971732513    | 0,528610894 | 1,4050874   | 0,640694934 | 1,139614728   | 1,473814651  | 0,604805199 | 0,486974371 |
| 0,934053617 | 0,826585289 | 0,403423996 | 0,855718787    | 0,607342885 | 1,364772155 | 0,660951351 | 1,324396067   | 1,359679186  | 0,577996697 | 0,588945995 |
| 0,824504616 | 0,945871767 | 0,953449985 | 1,230276979    | 0,504269947 | 1,161792538 | 0,61005565  | 1,122439535   | 1,879954794  | 0,922133605 | 0,405099397 |



| PAK4        | PAR         | PARP        | Paxillin    | PD-L1       | Pdcd4       | PDGFR-b     | PDHK1       | PDK1        | PDK1_pS241  | PEA-15      |
|-------------|-------------|-------------|-------------|-------------|-------------|-------------|-------------|-------------|-------------|-------------|
| 1,008511218 | 0,949483072 | 1,244225846 | 1,169322915 | 0,849401633 | 0,937328255 | 0,726457288 | 1,045458606 | 0,761037834 | 0,94075097  | 1,210846967 |
| 0,965789423 | 3,706514017 | 1,374407367 | 0,67769123  | 0,882143754 | 0,8848502   | 1,571059101 | 0,978248861 | 0,813346235 | 0,952677593 | 0,891847939 |
| 0,872571877 | 0,683035101 | 0,724717472 | 0,825573635 | 1,133927128 | 0,499522605 | 1,698652918 | 1,076629628 | 0,75191024  | 0,880247851 | 1,028494283 |
| 0,855261567 | 0,722774096 | 0,976044021 | 0,928864475 | 1,036703915 | 0,83165709  | 1,039117014 | 0,941280738 | 0,833256553 | 1,082257325 | 1,002283787 |
| 0,918024983 | 1,823386809 | 0,982309064 | 0,870602076 | 0,878147994 | 1,282186647 | 9,265792379 | 0,914575581 | 0,878234783 | 1,148775173 | 0,97411906  |
| 1,003082514 | 0,462575301 | 0,938507377 | 0,96009292  | 0,889691798 | 0,441509258 | 1,090747532 | 0,987548937 | 1,037747758 | 1,410806151 | 1,317277609 |
| 1,032653767 | 2,931661544 | 1,490635081 | 1,033473762 | 0,889035155 | 0,6553009   | 0,777672854 | 1,049398224 | 0,715731614 | 0,838459122 | 1,18874488  |
| 0,918892076 | 0,402605991 | 1,025633411 | 1,156116863 | 0,824165259 | 0,589326553 | 1,183812517 | 0,913055935 | 0,863728683 | 1,218710643 | 1,039877386 |
| 0,970840662 | 3,318713526 | 1,326271773 | 0,813304419 | 0,873319913 | 1,130988863 | 0,776550391 | 0,987164259 | 0,726843983 | 0,909152499 | 1,134701079 |
| 0,896802698 | 2,002969958 | 1,331369947 | 0,911486107 | 0,928547528 | 1,46553439  | 0,760814406 | 1,047477766 | 0,894606623 | 1,144621504 | 0,942978677 |
| 1,19356846  | 0,678830143 | 0,993011017 | 1,070110221 | 5,497039886 | 0,971335224 | 1,891477383 | 1,009613243 | 1,506797707 | 0,945984942 | 1,368007614 |
| 0,936419736 | 1,188740872 | 0,97743926  | 1,020483641 | 1,485707452 | 1,998147614 | 1,250282762 | 1,024469428 | 1           | 1,319576263 | 1,043764104 |
| 0,938886336 | 0,733269995 | 0,851663008 | 1,347637862 | 0,805877952 | 1,469133625 | 0,569399542 | 0,900843843 | 0,873838927 | 1,177096535 | 0,804922304 |
| 0,926435698 | 0,697254454 | 1,07448589  | 1,253805537 | 0,94029811  | 1,002909881 | 2,804433625 | 0,95585206  | 0,786350315 | 1,148269546 | 1,080301195 |
| 0,895874962 | 1,199803678 | 0,996182448 | 1,011268282 | 0,910016096 | 0,905061992 | 1,050272069 | 1,028253536 | 0,88331449  | 1,016984973 | 1,227421316 |
| 0,855931936 | 0,854606627 | 0,898078348 | 0,997702542 | 0,909184654 | 0,931917055 | 1,113767378 | 0,945923224 | 0,924392227 | 1,003565286 | 1,182178205 |
| 0,907141493 | 0,942113939 | 1,563988453 | 1,066695703 | 0,850153065 | 2,177939753 | 1,109370868 | 0,868736571 | 1,005211942 | 1,322229655 | 1,004118273 |
| 0,904157936 | 2,387238624 | 1,465535927 | 0,927076308 | 0,876205094 | 1,242974239 | 0,852018658 | 0,954229723 | 0,824068395 | 1,241440016 | 0,926197678 |
| 0,89265906  | 3,390547926 | 1,095006779 | 1,288317282 | 0,813156942 | 1,461665166 | 1,073442236 | 0,850825393 | 0,973987699 | 1,209371573 | 0,987884453 |
| 1,269614636 | 1,515394732 | 1,140995825 | 1,036182711 | 4,819660264 | 0,961681112 | 1,435912774 | 0,953598642 | 2,371226971 | 1,077495143 | 1,085285739 |
| 0,925669651 | 0,94576349  | 1,000258366 | 0,89599018  | 1,01006563  | 0,931638106 | 1,798063449 | 1,105165535 | 0,742629906 | 0,908208619 | 1,033227849 |
| 1,998670773 | 0,723439494 | 1,123570998 | 0,881972322 | 22,94153439 | 1,961872969 | 1,494478198 | 1,294514724 | 4,395941425 | 0,553196977 | 0,671469645 |
| 1,00898509  | 0,57528098  | 1,197863274 | 1,180114378 | 3,350507837 | 2,430732349 | 0,877941429 | 0,906311295 | 2,157889991 | 1,045868521 | 1,177264096 |
| 1,030417439 | 2,810951451 | 1,282743957 | 0,957952642 | 3,515948827 | 2,615564077 | 0,979233078 | 0,955019558 | 1,464811125 | 0,933331587 | 1,148629839 |
| 2,033828789 | 1,204290678 | 1,097431558 | 0,739853675 | 38,30942767 | 1,436991395 | 0,953770616 | 1,089825531 | 11,73716828 | 0,537868225 | 0,823366673 |
| 0,993005284 | 1,12222345  | 1,094565514 | 1,010061816 | 0,958722394 | 1,366271846 | 0,975952474 | 1,015597129 | 0,708394225 | 0,752944389 | 0,649386914 |
| 1,233962886 | 1,367253434 | 1,235225418 | 0,996057153 | 4,447379407 | 1,032068823 | 1,162460878 | 1,287499768 | 8,386683086 | 0,837620716 | 0,676131151 |

| PEA-15_pS116 | PI3K-p110-a | PI3K-p85    | PKA-a       | PKC-b-II_pS660 | PKC-delta_pS664 | PKCa        | PKM2        | gamma2_pY759 | PLK1        | PMS2        |
|--------------|-------------|-------------|-------------|----------------|-----------------|-------------|-------------|--------------|-------------|-------------|
| 0,948732575  | 1,136447061 | 1,068873588 | 0,984248802 | 1,013517202    | 1,063355977     | 0,98775855  | 1,193374647 | 1,081900748  | 0,869384814 | 0,869384814 |
| 0,961183367  | 1,090306639 | 1,036097026 | 0,918375431 | 0,815233416    | 1,030515824     | 1,022078288 | 1,102529476 | 1,170640309  | 0,915806141 | 0,915806141 |
| 1,27477249   | 0,784813083 | 0,707399062 | 0,862231752 | 1,110485933    | 1,207939721     | 0,715698568 | 0,92515778  | 1,060132674  | 1,131397804 | 1,131397804 |
| 1,064515115  | 1,000462077 | 0,905676997 | 0,904312498 | 1,185794743    | 1,04823176      | 1,443737719 | 1,195651936 | 1,090700509  | 1,183189393 | 1,183189393 |
| 0,877641559  | 1,033741067 | 1,080331611 | 0,865328649 | 1,095334696    | 0,941791561     | 1,385700183 | 1,402931234 | 1,185238822  | 0,787643965 | 0,787643965 |
| 0,891854202  | 1,09542718  | 1,331209385 | 0,979534896 | 1,219888027    | 0,998041584     | 1,395086076 | 0,228054156 | 0,91714639   | 1           | 1           |
| 0,92940006   | 0,965052832 | 1,04944021  | 0,942483225 | 0,825534071    | 1,035460002     | 0,608122898 | 1,559513536 | 0,914799783  | 0,92930878  | 0,92930878  |
| 1,056727154  | 1,107038899 | 0,83029428  | 1,299646188 | 1,236174394    | 0,945949122     | 1,016145267 | 1,035191931 | 1,160381632  | 1,334799989 | 1,334799989 |
| 0,924034901  | 1,107459347 | 0,960699453 | 1,145378556 | 0,889022468    | 1,065807106     | 1,58614248  | 1,121955917 | 1,100741584  | 0,890984391 | 0,890984391 |
| 0,910405201  | 1,130310446 | 0,906655968 | 0,936367184 | 1,008393601    | 1,096167287     | 1           | 1,139811952 | 1,163707978  | 0,785632569 | 0,785632569 |
| 0,950864352  | 0,976032905 | 0,92618886  | 1,033007469 | 0,945210782    | 0,997056899     | 1,383412519 | 1,440437931 | 1,084432808  | 1,057420285 | 1,057420285 |
| 1,060975932  | 1,052025935 | 1,008984003 | 1,030006973 | 1,129662365    | 1,041340505     | 0,888710717 | 1,228223885 | 0,982560179  | 0,983226513 | 0,983226513 |
| 1,186423503  | 1,092847668 | 1,567419989 | 1,408155097 | 1,776066326    | 1,008680417     | 1,293045492 | 0,753240265 | 1,1276144    | 0,807683589 | 0,820931135 |
| 1,129224541  | 1           | 1,220700965 | 1,191270362 | 1,61359843     | 0,905187627     | 1,193051106 | 0,67807188  | 1,109716344  | 1,129335468 | 1,129335468 |
| 1,072966852  | 1,091055852 | 1,284467032 | 1,076337725 | 1,954480343    | 1,044439087     | 0,814551801 | 1,231315148 | 1,274513759  | 0,898645048 | 0,898645048 |
| 0,910173104  | 0,950635438 | 1,071544674 | 0,941005666 | 1,224078624    | 0,945501146     | 1,438554048 | 1,302665286 | 0,960068199  | 0,943653081 | 0,943653081 |
| 1,136237876  | 1,041927822 | 1,389362744 | 1,403938149 | 2,045459246    | 0,958822647     | 1,542692895 | 1,01054689  | 1,350011777  | 0,792985253 | 0,821716878 |
| 0,912695163  | 1,191524362 | 1,064746816 | 1,104042884 | 1,119780766    | 0,999797734     | 1,600846767 | 0,918639755 | 1,047353067  | 0,92304201  | 0,92304201  |
| 0,84038619   | 1,062573086 | 0,971369359 | 1,311438675 | 1,09675763     | 0,945443431     | 1,318065601 | 1,322462047 | 0,969584274  | 0,768032445 | 0,853180905 |
| 0,856116527  | 1,024391866 | 0,928026326 | 1,05736049  | 1,128069499    | 1,062995201     | 1,56283231  | 0,725970026 | 1,087429255  | 1,374071717 | 1,374071717 |
| 1,030372882  | 0,940121754 | 0,9949424   | 0,795501026 | 0,791406526    | 1,162332919     | 0,878487578 | 1,259673402 | 1,038015005  | 1,263434755 | 1,263434755 |
| 1,182712655  | 0,763361791 | 0,61835015  | 0,820076756 | 1,215395903    | 1,204161641     | 1,013699103 | 0,450631101 | 1,413339009  | 1,975982845 | 1,975982845 |
| 1,032035347  | 0,979158005 | 0,96061496  | 1,074905074 | 2,098133088    | 0,983970589     | 0,783546478 | 1,300878661 | 1,342033335  | 0,986457081 | 0,986457081 |
| 1,01732084   | 1,196631789 | 0,864070921 | 1,02589461  | 1,171154156    | 1,003116274     | 0,895691105 | 0,952072336 | 1,289283157  | 0,949246349 | 0,949246349 |
| 1,107706131  | 0,743959135 | 0,759704813 | 0,40195522  | 0,705040044    | 1,008786409     | 0,673514176 | 0,344863238 | 1,091749273  | 1,21104404  | 1,909150194 |
| 0,989134917  | 0,845617373 | 0,930669663 | 0,390212412 | 0,788473653    | 0,898606955     | 0,571519095 | 0,460984102 | 0,951953309  | 1,2774609   | 1,684543271 |
| 0,889585482  | 0,817523619 | 0,838561591 | 0,485458745 | 0,854188808    | 1,014178511     | 0,9798212   | 0,495412387 | 1,115854944  | 2,172345353 | 2,172345353 |

| PRAS40_pT246 | PREX1       | Progesterone-Receptor | PTEN        | Rab11       | Rab25       | Rad50       | Rad51       | Raptor      | RBM15       | Rb_pS807_S811 |
|--------------|-------------|-----------------------|-------------|-------------|-------------|-------------|-------------|-------------|-------------|---------------|
| 1,026829772  | 1,050184247 | 1,080115009           | 1,005460294 | 1,070154834 | 1,127594726 | 1,165325057 | 0,981281383 | 1,012687225 | 1,488230682 | 0,918489598   |
| 0,986150033  | 1,04358813  | 0,999886045           | 0,892706119 | 1,035260339 | 0,986315061 | 1,215743674 | 0,91630983  | 1,029916301 | 1,282269056 | 1,032926598   |
| 0,773792109  | 1,022678141 | 1,057004039           | 1,110147839 | 1,457344071 | 0,835036777 | 0,580377653 | 1,235290424 | 0,648200038 | 0,4902366   | 0,787991418   |
| 0,860289828  | 0,804579879 | 0,884643096           | 0,895121853 | 0,996161473 | 0,99663848  | 0,904440279 | 0,874094235 | 0,796082844 | 0,937684483 | 0,824063016   |
| 1,363534304  | 1,080110593 | 0,955782828           | 0,900742544 | 0,972319181 | 1,06870357  | 1,162248611 | 1,028782333 | 1,204213241 | 1,348858366 | 1,535870354   |
| 0,788871902  | 0,923314035 | 0,925424125           | 1,061041838 | 0,940475331 | 1,201081505 | 1,072965    | 0,931954254 | 0,840652333 | 1,057102439 | 0,696476001   |
| 0,997292474  | 0,936064196 | 1,060105237           | 0,995550771 | 0,967987433 | 1,152631938 | 1,228102445 | 0,928797665 | 1,076014378 | 1,236955634 | 0,647241262   |
| 1,294809336  | 0,858397482 | 0,891238305           | 1,033930113 | 0,855440521 | 0,800711887 | 1,090968375 | 1,082620128 | 0,947546035 | 1,131769518 | 0,929656158   |
| 0,984171735  | 0,940639601 | 1,199736482           | 1,181808728 | 0,954271988 | 1,150904668 | 0,939960033 | 0,944653257 | 1,275423262 | 1,150165192 | 0,975046479   |
| 0,978690739  | 0,92799341  | 1,001319727           | 0,898331632 | 1,084447099 | 1,246051762 | 1,041827192 | 0,94836289  | 1,182267654 | 1,126962255 | 0,866168858   |
| 0,770014012  | 1,013826434 | 0,965126377           | 1,020739127 | 1,142736405 | 1,00053879  | 0,934578586 | 0,919435176 | 1,058224528 | 0,877629712 | 0,736467851   |
| 1,236758131  | 0,953706816 | 0,877118611           | 1,001693519 | 0,953086312 | 0,859924968 | 1,020105663 | 1,050610078 | 1,059602105 | 1,319493921 | 1,161033123   |
| 1,657134768  | 1,2835323   | 1,051916115           | 0,587378969 | 1,147809814 | 1,0536683   | 1,151248525 | 0,852745478 | 1,070839334 | 1,004419939 | 1,587719833   |
| 0,818671945  | 1,159905581 | 0,930516846           | 1,174992124 | 1,045454254 | 1,036391072 | 0,924701456 | 0,615684829 | 1,040885162 | 0,678607715 | 0,812520281   |
| 0,925568484  | 1           | 0,959067596           | 1,049585391 | 0,947909371 | 0,906562264 | 1,005610508 | 1,064464488 | 1,260392863 | 0,959385007 | 0,931400565   |
| 1            | 1,128448256 | 1,072010728           | 1,036028609 | 0,961147203 | 0,935339336 | 0,872554809 | 0,802718133 | 1,01900945  | 0,889768188 | 1,138858904   |
| 1,043560951  | 1,191459323 | 1,071255091           | 0,98046051  | 0,843776674 | 1,182604402 | 1,20538135  | 0,977213531 | 1,098405625 | 0,864692105 | 1,495908301   |
| 1,159998938  | 0,936584288 | 0,951473527           | 1,107356236 | 0,882316542 | 1,166960015 | 1,235989872 | 0,97106787  | 1,142692684 | 1,021645954 | 1,232852253   |
| 1,479056289  | 1,120835538 | 1,099580134           | 1,28836633  | 0,986913996 | 1,03896793  | 1,30831411  | 0,941231002 | 1,200891332 | 1,263328099 | 1,082961111   |
| 1,006134848  | 1,018823222 | 0,960372873           | 0,96636917  | 1,139939307 | 0,85464162  | 0,726684762 | 0,921384287 | 0,876795057 | 0,720612429 | 0,957007974   |
| 0,908906517  | 1,002132369 | 1,10256127            | 0,866823302 | 1,108918104 | 1,065524689 | 0,729336331 | 0,932622122 | 0,902211083 | 0,735133746 | 0,890645101   |
| 0,960068687  | 1,132609829 | 0,976047824           | 0,382377744 | 1,069150666 | 0,98851124  | 0,764002473 | 1,511219908 | 1,105820392 | 0,469676465 | 1,376224629   |
| 1,231765821  | 0,87765853  | 0,956072255           | 1,29923238  | 1,103376036 | 0,972229276 | 1,139683835 | 0,964128813 | 1,32411987  | 1,098380617 | 1,036470882   |
| 1,725056124  | 0,942346001 | 1,084541388           | 1,074399583 | 0,957563734 | 1,180198468 | 0,954416626 | 1,079978915 | 0,94852438  | 1,1572205   | 1,727301584   |
| 0,979154843  | 1,685366443 | 1,523112976           | 0,606179838 | 1,061469605 | 1,791792467 | 1,054657298 | 1,342275887 | 0,688926573 | 1,013377674 | 1,068424358   |
| 0,77933938   | 1,690271015 | 1,642377051           | 0,595035898 | 1,00560672  | 1,880065593 | 1,008970155 | 1,374152726 | 0,723492948 | 0,913103967 | 1,035497407   |
| 0,960354811  | 1,277035593 | 1,178215713           | 0,570720295 | 0,828881401 | 1,659141028 | 0,942172003 | 1,429366241 | 0,614034358 | 0,652681034 | 1,512986403   |

| Rictor      | Rictor_pT113<br>5 | RIP         | RPA32_pS4_S8 | RSK         | S6_pS235_S2<br>36 | S6_pS240_S2<br>44 | SDHA        | Shc_pY317   | SHP-2_pY542 | SLC1A5      |
|-------------|-------------------|-------------|--------------|-------------|-------------------|-------------------|-------------|-------------|-------------|-------------|
| 1,327776901 | 0,904227673       | 0,926987351 | 1,097754534  | 1,02125946  | 1,067831132       | 1,118803103       | 0,955860022 | 1,170592463 | 0,849959485 | 0,819590002 |
| 1,688080549 | 0,912132664       | 0,916520742 | 1,19844302   | 1,003642265 | 0,737863774       | 0,733162707       | 1,064857191 | 0,992518138 | 1,037960153 | 0,855939523 |
| 0,510298407 | 1,548288011       | 0,857731662 | 0,73870385   | 0,556302306 | 1,357354049       | 1,092084604       | 0,750096129 | 0,953230837 | 0,954444615 | 1,057437872 |
| 1,000124845 | 1,064405757       | 0,567508594 | 1,01525174   | 1,313705779 | 1,673320198       | 1,411966752       | 0,894708279 | 1,204986895 | 1,209626298 | 1,105843824 |
| 1,592187833 | 1,021401171       | 0,99441702  | 1,083669551  | 0,880318531 | 1,38251747        | 1,325033732       | 1,027308369 | 1,043207173 | 1,045988352 | 1,409090101 |
| 1,233754787 | 0,730237821       | 1,060230684 | 0,780858461  | 1,056856119 | 0,48004743        | 0,469201614       | 1,05933113  | 0,697811601 | 0,609918018 | 1,010402526 |
| 1,415163637 | 0,891344406       | 0,928583643 | 1,105180729  | 0,91832939  | 0,691919947       | 0,798333744       | 1,196461819 | 0,821110019 | 0,7676151   | 0,935565186 |
| 1,279913158 | 1,041237397       | 0,800409028 | 0,981491389  | 0,770303246 | 2,918392201       | 2,420848242       | 0,920334084 | 1,10976255  | 1,021305711 | 1,247543573 |
| 1,847974823 | 0,918549642       | 0,952415819 | 1,03204694   | 0,891939199 | 0,614909257       | 0,660094033       | 0,969932776 | 0,911753512 | 0,961520256 | 0,832740381 |
| 1,440554872 | 1,050723311       | 1,302719603 | 0,929120143  | 0,962877355 | 0,713635426       | 0,831610274       | 0,92640485  | 1,282852487 | 0,951288219 | 1,363967859 |
| 1,043127954 | 0,913334661       | 1,144909157 | 0,732602814  | 0,906880081 | 1,418018895       | 1,303294893       | 1,085013965 | 0,955019738 | 0,870511646 | 0,988296293 |
| 1,801383083 | 1,384682002       | 1,101947    | 1,171700148  | 1,151029781 | 2,355104631       | 1,922537544       | 0,837036446 | 1,30715014  | 1,124939813 | 0,918952598 |
| 1,642179313 | 1,582005204       | 0,935481931 | 0,996863446  | 0,930246313 | 1,322681905       | 1,184627694       | 0,879168929 | 1,149749579 | 0,940780614 | 1,03487985  |
| 0,868924675 | 1,133865453       | 0,707058739 | 0,748297783  | 0,954753242 | 1,17286237        | 0,956578839       | 1,049471131 | 0,96054705  | 1,008432028 | 1,588098731 |
| 0,910791338 | 1,08955092        | 0,883074102 | 1,045812276  | 1,190605324 | 1,044868929       | 1,046405551       | 1,051308534 | 0,821319644 | 0,979805379 | 0,845997786 |
| 1,211323734 | 1,198071475       | 0,788601404 | 1,095927888  | 1,101453729 | 1,134295824       | 1,110167932       | 0,997640531 | 0,926268476 | 1,083368978 | 0,922187547 |
| 0,980737444 | 1,016458266       | 1,329401048 | 0,985362219  | 1,087354756 | 1,121891285       | 1,108718817       | 0,887515174 | 0,916956371 | 0,886021232 | 1,461399627 |
| 1,634175436 | 0,940225632       | 0,986959835 | 1,169444326  | 1,12896797  | 1,544463149       | 1,629991542       | 0,890938102 | 1,203906973 | 1,069943743 | 0,916827794 |
| 1,759431707 | 1,041662053       | 0,975632859 | 1,057331427  | 1,355010392 | 0,720879861       | 0,794719622       | 0,866844495 | 1,195081061 | 0,978639117 | 1,246342441 |
| 1,074991705 | 1,241982476       | 0,681790275 | 0,882161103  | 0,854113558 | 1,108281641       | 0,892394841       | 0,791930953 | 0,809928989 | 1,127359521 | 1,284248093 |
| 1,105569449 | 1,137993205       | 0,819203679 | 0,849378604  | 1,043783541 | 1,214739393       | 1,208601627       | 0,919437045 | 0,800506096 | 1,02066265  | 1,180843514 |
| 0,558139547 | 1,158967018       | 1,062723131 | 0,61276954   | 0,464377333 | 1,203513849       | 0,819974074       | 0,734907078 | 1,362822239 | 0,899856811 | 1,846812047 |
| 0,881098085 | 1,01860386        | 0,96231541  | 1,126471257  | 1,52103042  | 2,832885116       | 2,181120258       | 0,981703935 | 1,204791983 | 1,172400771 | 1,590464893 |
| 1,813284839 | 1,272769216       | 1,106965475 | 1,18100596   | 0,948229105 | 1,987524831       | 1,795996851       | 0,91245412  | 1,348869159 | 1,315143672 | 1,425543203 |
| 0,688723848 | 0,96547344        | 2,894107647 | 0,759624617  | 0,472578734 | 0,326636183       | 0,431963284       | 1,096266818 | 1,724182207 | 0,945613463 | 2,656884655 |
| 0,739365977 | 0,932059632       | 2,846876191 | 0,697825335  | 0,640315147 | 0,750295868       | 0,842388825       | 1,098850902 | 1,400538692 | 1,052519798 | 2,8025146   |
| 0,481973104 | 0,921115117       | 2,131561711 | 0,70541115   | 0,323815247 | 0,608082036       | 0,495015141       | 1,44815142  | 1,328309794 | 0,800926815 | 3,272926537 |

| Slf11       | Smad1       | Smad3       | SOD2        | Sox2        | Src-(phospho-Y416) | Src_pY527   | Stat3       | Stat3_pY705 | Stat5a      | Stathmin-1  |
|-------------|-------------|-------------|-------------|-------------|--------------------|-------------|-------------|-------------|-------------|-------------|
| 0,918623857 | 1,071437428 | 1,04506218  | 0,920966593 | 0,883479796 | 0,97909468         | 0,522086572 | 1,401620256 | 1,118735842 | 0,92915578  | 0,962649318 |
| 0,969293414 | 1,088571895 | 1,166566219 | 1,000540148 | 0,818422895 | 1,100019054        | 0,869286752 | 1,113555951 | 1,114806437 | 1,069173503 | 1,003719447 |
| 1,128110889 | 0,828359213 | 1,049931935 | 0,921803986 | 2,417890041 | 0,74283989         | 1,154773187 | 0,448183649 | 1,072901932 | 0,379111403 | 1,137406246 |
| 0,765505826 | 0,950749534 | 1,006586347 | 1,041816692 | 2,711438096 | 1,534176497        | 1,558775287 | 0,8057947   | 1,106494211 | 0,951714253 | 0,910942049 |
| 0,849013609 | 1,090749813 | 1,056073485 | 1,05534269  | 0,744420736 | 1,052690465        | 0,843577989 | 1,389401072 | 1,075107979 | 1,128045935 | 0,946188827 |
| 1,037447952 | 1,027596894 | 1,103998723 | 1,135729725 | 0,90462786  | 0,627345694        | 0,12303244  | 0,94446899  | 0,954488922 | 0,643398362 | 0,982551811 |
| 0,922516929 | 1,123663905 | 1,063988667 | 1,037429508 | 1,471420964 | 0,849704501        | 0,674218668 | 1,210414875 | 0,871785889 | 1,038119625 | 1,068474778 |
| 0,942297556 | 1,402165436 | 1,08389842  | 0,994825865 | 1,910331621 | 0,904611188        | 2,117227404 | 1,343272791 | 1,138544106 | 1,376982323 | 0,846953027 |
| 0,895071351 | 1,034519403 | 1,110066741 | 1,080294105 | 1,087054519 | 1,017552476        | 0,92122884  | 1,720470398 | 1,174754167 | 1,128746809 | 1,015071534 |
| 0,877649154 | 1,02935771  | 1,082901337 | 1,120105202 | 0,901619884 | 1,02514403         | 0,728780633 | 1,277418314 | 0,994052359 | 0,867080235 | 1,041198402 |
| 0,921115408 | 1,055394761 | 0,91558109  | 0,966029005 | 1,040276761 | 1,09812281         | 1,035573324 | 0,985044063 | 1,054973843 | 0,784816344 | 1,043290614 |
| 1,017593112 | 0,773767016 | 0,947572342 | 0,940915032 | 1,540193632 | 1,274276923        | 2,714539243 | 1,108269531 | 1,019555099 | 1,49526987  | 1,074381957 |
| 1,20587405  | 1,010473068 | 0,84762259  | 0,832702674 | 0,782062264 | 0,818433984        | 1,524217807 | 0,883232903 | 0,87865077  | 1,001933637 | 1,246140145 |
| 0,967392838 | 0,862679171 | 0,947767985 | 1,019421399 | 0,874281142 | 0,726299209        | 1,704641155 | 0,930667114 | 1,131948293 | 0,702396489 | 0,878135272 |
| 0,901255775 | 1,011681283 | 0,931631556 | 0,958315561 | 1,205213434 | 0,862850078        | 1,045838492 | 1,062029151 | 1,00251678  | 0,63155085  | 1,022442637 |
| 1,03415231  | 0,976670583 | 0,995962595 | 1,007626232 | 2,1428006   | 0,93109291         | 1,491544761 | 0,93766313  | 0,985831082 | 1,223375595 | 1,03114005  |
| 0,82459492  | 0,9990809   | 0,858783284 | 1,051122163 | 1,110157516 | 1,098191636        | 1,08765768  | 0,807702189 | 0,970468906 | 0,729399509 | 0,964376058 |
| 0,937611179 | 1,135781994 | 0,956513746 | 0,984299896 | 1,134578865 | 2,031918569        | 1,477063349 | 1,134735675 | 1,13445417  | 0,902706372 | 0,985723234 |
| 0,856614975 | 0,968765291 | 0,921856558 | 1,083755044 | 1,923988284 | 1,870535682        | 1,582694529 | 0,96764987  | 1,002503705 | 2,414335791 | 0,997447994 |
| 1,0769374   | 0,957874515 | 0,844326461 | 0,947604463 | 1,267259539 | 1,082968276        | 1,196048599 | 0,782360363 | 1,133035868 | 0,984416555 | 0,962718541 |
| 1,144566733 | 0,920763358 | 0,838346956 | 0,954583957 | 1,761443238 | 1,665446856        | 1,206365592 | 0,820192907 | 1,065077834 | 1,263570824 | 1,246487119 |
| 0,993627972 | 0,967715386 | 1,099691205 | 0,931893227 | 0,926972881 | 1,43240083         | 0,916896053 | 0,460872647 | 0,693376018 | 1,262620628 | 1,160577565 |
| 0,932416323 | 0,894875504 | 1,02984355  | 0,786149341 | 1,21022701  | 1,635977221        | 2,04671902  | 1,176483565 | 1,116789117 | 0,986350843 | 0,981218367 |
| 0,972210701 | 0,951064662 | 1,028634329 | 0,919842167 | 0,815495585 | 1,775719049        | 1,780360775 | 1,167856473 | 1,10274435  | 1,395987609 | 1,011567366 |
| 1,03052794  | 0,816469372 | 0,707021271 | 1,212889262 | 0,914164587 | 0,971642775        | 0,79699733  | 0,332741439 | 0,844866312 | 1,454613005 | 0,809861042 |
| 1,025580911 | 0,988601559 | 0,809113041 | 1,422803958 | 0,874641687 | 0,924610379        | 0,815380601 | 0,438018643 | 0,927004317 | 0,968365826 | 0,969971192 |
| 1,119553701 | 0,852868294 | 0,722236612 | 1,56309088  | 1,007487475 | 0,921373628        | 0,794155712 | 0,331404756 | 0,802799441 | 1,161463217 | 0,667561634 |

| STING       | TAZ         | TFAM        | TFRC        | TIGAR       | TRIM25      | TSC1        | TTF1        | Tuberin     | Tuberin_pT14<br>62 | TUFM        |
|-------------|-------------|-------------|-------------|-------------|-------------|-------------|-------------|-------------|--------------------|-------------|
| 1,635075879 | 1,359296317 | 1,056274663 | 0,869384814 | 1,13278611  | 0,869384814 | 1,151396659 | 0,97567229  | 0,958130252 | 0,886392259        | 1,025816648 |
| 0,982024628 | 1,268853401 | 0,877941422 | 0,915806141 | 1,089387752 | 0,915806141 | 1,032319405 | 1,046630843 | 0,677876027 | 0,981624513        | 0,999831436 |
| 1,011713456 | 0,465485208 | 1,08461928  | 1,131397804 | 1,038780413 | 1,131397804 | 1,054237927 | 1,2539141   | 0,837456111 | 1,196347832        | 0,638855985 |
| 1,47436741  | 0,661706943 | 1,134269505 | 1,183189393 | 1,099347582 | 1,183189393 | 1,084454886 | 0,86817791  | 0,875792036 | 0,840215124        | 0,821835383 |
| 0,974633629 | 1,443549472 | 0,859595053 | 0,787643965 | 0,983295709 | 0,787643965 | 1,038337911 | 0,845179666 | 0,809016846 | 0,857692439        | 0,974945574 |
| 1,549220626 | 1,293820664 | 0,95865422  | 1           | 1,101641102 | 1           | 1,014487422 | 0,924794775 | 0,828342624 | 0,968715614        | 1,006542842 |
| 1,085202003 | 1,038134105 | 0,935687132 | 0,92930878  | 1,064002354 | 0,92930878  | 0,959359291 | 0,91642433  | 0,966102312 | 0,98727856         | 1           |
| 1,149854394 | 0,920100313 | 1,279611642 | 1,334799989 | 1,343524488 | 1,334799989 | 1,056019052 | 0,907074862 | 0,988013591 | 0,841041122        | 0,989853423 |
| 1,225438787 | 1,034889397 | 0,854145946 | 0,890984391 | 0,98916527  | 0,890984391 | 1,051906323 | 0,953543135 | 1,179048813 | 0,945732605        | 1,008542807 |
| 1,510490854 | 1,135999112 | 0,978444106 | 0,785632569 | 0,817040062 | 0,785632569 | 0,993863384 | 0,842603089 | 1,087244222 | 0,807889763        | 0,987736515 |
| 2,36679459  | 1,112878272 | 1,069252323 | 1,057420285 | 1,041552141 | 1,057420285 | 1,105251422 | 0,804561457 | 0,925635213 | 0,732307511        | 0,857561105 |
| 0,670499848 | 0,901166488 | 1,022822516 | 0,983226513 | 0,976799963 | 0,983226513 | 0,812152372 | 0,889535907 | 0,811724532 | 0,883532327        | 1,012428624 |
| 0,626453603 | 0,961231481 | 1,034109378 | 0,807683589 | 0,966594455 | 0,807683589 | 1,264962877 | 1,014020763 | 1,099397318 | 1,028201064        | 0,869441687 |
| 1,047677481 | 1,043896526 | 1,082642212 | 1,129335468 | 0,913044894 | 1,129335468 | 1,38968228  | 1,260241775 | 1,104330493 | 1,206961548        | 0,705038147 |
| 1,799972184 | 1,27019522  | 0,950305768 | 0,898645048 | 1,157539192 | 0,898645048 | 1,273867975 | 1,082279943 | 0,965797341 | 1,062660548        | 0,714346992 |
| 1,058683538 | 1,008819507 | 0,937176276 | 0,943653081 | 0,971113718 | 0,943653081 | 0,937562142 | 1,050143136 | 1,05668004  | 1,16759096         | 0,754845891 |
| 1,168999812 | 0,751395957 | 0,933938866 | 0,875376447 | 0,986322509 | 0,792985253 | 1,282574912 | 0,939852895 | 1,400153234 | 1,058930622        | 0,921310875 |
| 0,595467692 | 0,998670346 | 1,009989097 | 0,92304201  | 0,963909042 | 0,92304201  | 0,927910107 | 0,89705044  | 1,090000033 | 0,969785599        | 1,014627116 |
| 0,921445889 | 0,859956485 | 0,960743888 | 0,768032445 | 0,898308691 | 0,768032445 | 1,281179134 | 0,871275878 | 1,281219669 | 0,992118232        | 0,96861751  |
| 0,724453776 | 0,83392434  | 1,31725965  | 1,374071717 | 0,953358635 | 1,374071717 | 0,940550313 | 1,078820434 | 1,088365505 | 1,174422038        | 0,8660515   |
| 1,087026237 | 0,828931551 | 1,21119706  | 1,263434755 | 0,857689371 | 1,263434755 | 0,933237417 | 0,976180559 | 1,098058722 | 0,820812322        | 0,789585385 |
| 1,041800232 | 0,463642866 | 1,894284293 | 1,975982845 | 0,529852256 | 1,975982845 | 0,826252983 | 0,875533946 | 1,462614565 | 1,030065855        | 0,742439498 |
| 0,863549627 | 0,660734004 | 1,069625508 | 0,986457081 | 1,022846746 | 0,986457081 | 0,981254534 | 0,980890911 | 1,158452475 | 0,891553127        | 0,980002848 |
| 0,850209903 | 1,003548566 | 1,112537908 | 0,949246349 | 0,932273339 | 0,949246349 | 1,023307365 | 0,954602554 | 0,970263913 | 0,956309053        | 0,97701058  |
| 1,26191856  | 0,741565158 | 1,575979809 | 1,976928763 | 0,631570154 | 1,091009894 | 0,591514295 | 1,197835408 | 1,798945443 | 1,082892423        | 1,178947784 |
| 1,290339987 | 1,43595783  | 1,580472488 | 2,051373506 | 0,684403222 | 1,014495827 | 0,682705156 | 1,234314003 | 1,973353602 | 0,989256968        | 1,080809105 |
| 1,145328715 | 0,545909435 | 2,08252804  | 2,172345353 | 0,700418485 | 2,172345353 | 0,714106342 | 1,367575367 | 1,607961305 | 1,527319217        | 0,96417767  |

| Tyro3       | U-Histone-H2B | UBAC1       | ULK1_pS757  | VASP        | VEGFR-2     | Wee1        | Wee1_pS642  | WIPI1       | WIPI2       | XBP-1       |
|-------------|---------------|-------------|-------------|-------------|-------------|-------------|-------------|-------------|-------------|-------------|
| 1,07255918  | 1,042845431   | 0,748974666 | 0,837840723 | 1,113913268 | 1,097267533 | 1,246381379 | 0,956326435 | 1,000570206 | 0,96600351  | 0,647975726 |
| 0,987093223 | 0,995767973   | 0,939918031 | 0,969356501 | 1,251708511 | 1,066924804 | 1,114774033 | 0,997267426 | 1,338772815 | 0,589059808 | 1,127666012 |
| 1,0276038   | 1,079828853   | 0,878455668 | 0,977601121 | 0,402263485 | 0,774635256 | 0,732031697 | 1,141387393 | 0,611735766 | 0,677450451 | 2,185414307 |
| 0,890684749 | 1,234574781   | 0,766242051 | 1,139340495 | 1,061754069 | 1,186093778 | 0,765541648 | 1,0684342   | 1,013784043 | 0,695603564 | 0,897645663 |
| 1,171528576 | 1,301233784   | 0,8781879   | 1,096069067 | 0,779688523 | 1,199109565 | 0,782637558 | 1,053795907 | 1,329164896 | 0,9166671   | 0,657890848 |
| 1,086816485 | 0,438279513   | 1,075785876 | 0,33769572  | 1,595227486 | 1,163114465 | 0,975400546 | 0,801252    | 1,287007281 | 1,043631826 | 1,283286161 |
| 0,980602047 | 0,699858517   | 1,087788295 | 0,788528954 | 1,557212909 | 1,111861558 | 0,601277005 | 0,921103521 | 1,289842672 | 1,024495462 | 0,923734061 |
| 0,98996246  | 0,864018691   | 0,787776362 | 1,383230848 | 0,805585135 | 1,019638737 | 0,863636024 | 0,909490935 | 1,537678844 | 0,748530755 | 1,037537422 |
| 0,954152577 | 0,937122317   | 1,018027145 | 1,145412068 | 1,527626879 | 1,156473694 | 0,968577485 | 1,01982143  | 1,482083243 | 1,022185947 | 0,635833212 |
| 1,040056215 | 0,967246325   | 1,085508827 | 1,069853995 | 1,082498761 | 0,973414116 | 1,47896526  | 0,916754334 | 0,99484005  | 0,857196901 | 0,917594445 |
| 0,872302527 | 0,742372996   | 0,979218044 | 1,169581025 | 1,193049594 | 1,034374474 | 1,094257456 | 0,780005513 | 0,948267784 | 0,723169823 | 0,860061642 |
| 1,113742461 | 1,157995209   | 0,895513666 | 1,675307352 | 0,909161011 | 1,18418114  | 1,309701952 | 0,942468713 | 0,999942859 | 1,007899515 | 0,913504959 |
| 1,079588204 | 0,933082889   | 0,980298944 | 1,679892265 | 0,874063196 | 0,805700961 | 1,343772467 | 0,998576875 | 0,987391579 | 0,915045867 | 0,970659308 |
| 0,921933626 | 1,315111646   | 0,858064275 | 0,775102793 | 0,635192392 | 0,869970701 | 1,082038401 | 0,968648781 | 0,811596538 | 0,771267487 | 2,133887863 |
| 0,910728861 | 0,991612566   | 0,895131202 | 0,840758549 | 0,953851317 | 0,805423613 | 1,007596005 | 1,067631146 | 0,914513509 | 0,876094527 | 1,282765558 |
| 0,926752851 | 0,990979786   | 0,962494503 | 0,994047009 | 1,174873738 | 1,366587942 | 0,949651109 | 1,101018024 | 1,164990058 | 0,708377833 | 1,731916461 |
| 0,942999694 | 0,885897885   | 0,99631097  | 1,121433445 | 0,992313684 | 1,024308065 | 1,365739764 | 1,03644191  | 0,779503298 | 0,964154697 | 1,414963438 |
| 0,940280013 | 1,034802207   | 1,003397844 | 1,369615012 | 1,182558465 | 1,18918494  | 0,894701773 | 0,950805209 | 1,272217306 | 0,946564871 | 0,928579136 |
| 0,954726192 | 0,872833295   | 0,844165968 | 1,253740716 | 1,917276189 | 1,559713916 | 1,169221773 | 0,950086826 | 1,079591448 | 0,911636718 | 0,741307788 |
| 0,981110491 | 1,00611435    | 1,032103172 | 1,073665852 | 0,853862968 | 1,033352872 | 0,889045433 | 0,834632144 | 0,965141604 | 0,845954408 | 1,637130024 |
| 0,958235749 | 0,898971671   | 1,044608029 | 1,082354177 | 1,616228425 | 1,110001453 | 0,83009057  | 1,007127634 | 1,106082215 | 0,843180563 | 0,99397852  |
| 0,972801733 | 0,891973046   | 2,443872343 | 1,16518945  | 0,491010326 | 0,367253548 | 1,278491146 | 0,786621367 | 0,506944255 | 1,211172773 | 1,693683025 |
| 0,9340764   | 0,94361569    | 0,954686228 | 1,268530629 | 0,775113921 | 1,123773167 | 0,690896476 | 0,963318384 | 1,067478593 | 1,018214588 | 0,748305814 |
| 0,936482116 | 1,526407697   | 0,952958055 | 1,052863051 | 0,958834023 | 0,974122018 | 1,552666944 | 0,963265354 | 0,886467178 | 0,99070981  | 1,085860798 |
| 1,204939368 | 0,789415936   | 1,33411409  | 1,012248666 | 0,474485781 | 0,410074221 | 3,335943624 | 1,369396374 | 0,825688329 | 1,759317567 | 1,005801748 |
| 1,838268388 | 0,670531846   | 1,204980554 | 1,067323773 | 0,561232926 | 0,512731773 | 3,321566053 | 1,547048179 | 0,938021711 | 1,288950335 | 1,495129191 |
| 1,007024799 | 0,471283025   | 2,107449674 | 0,929508878 | 0,556443555 | 0,373792475 | 2,704586322 | 0,952218424 | 0,6676689   | 1,462912878 | 2,243137295 |

| XPF         | XRCC1       | YAP         | YAP_pS127   | YB1_pS102   | ZAP-70      |
|-------------|-------------|-------------|-------------|-------------|-------------|
| 0,94430059  | 1,420583345 | 1,027471429 | 1,160888573 | 0,841021121 | 1,181052484 |
| 0,992503616 | 1,514062263 | 1,058664854 | 1,058291758 | 0,897663993 | 0,889337827 |
| 1,305872272 | 0,473663941 | 1,072489255 | 0,922037345 | 1,587006077 | 1,291317269 |
| 1,020445963 | 1,012902573 | 1,100520198 | 0,909631286 | 1,235304985 | 1,149317352 |
| 1,004789204 | 1,379089484 | 1,04738806  | 1,090037108 | 0,913510783 | 0,810192433 |
| 0,951570426 | 1,193844085 | 1,015305174 | 0,655865742 | 0,759720163 | 1,22540778  |
| 1,025387585 | 1,545770007 | 0,916037027 | 1,160431599 | 0,940369368 | 0,881753492 |
| 0,84075884  | 1,064810892 | 0,850109364 | 0,886736164 | 1,207346976 | 0,84518364  |
| 0,926809343 | 1,587427783 | 0,903708821 | 0,882089647 | 0,948125224 | 0,750375619 |
| 1,129098156 | 1,425090928 | 1,199310253 | 0,950860182 | 1,027904779 | 1,102709727 |
| 0,951354293 | 1,042938652 | 0,943320451 | 0,839951866 | 0,799429065 | 1,364403967 |
| 0,99627765  | 0,981885298 | 1,044379974 | 1,940154246 | 1,003733585 | 0,836182304 |
| 1,083841174 | 0,94557109  | 0,953787478 | 2,225132126 | 0,968826396 | 1,564966525 |
| 1,065872168 | 0,764765666 | 0,865419057 | 1,129772849 | 0,941306611 | 2,575787897 |
| 1,037132838 | 0,791980956 | 0,974060989 | 0,985422409 | 1,002339102 | 2,569526438 |
| 1,009925372 | 0,944940313 | 0,930116551 | 1,240277521 | 1,006725237 | 1,114726261 |
| 0,93967275  | 0,969887142 | 1,050808613 | 0,739110542 | 0,873258438 | 1,469035233 |
| 0,918083676 | 1,402464819 | 0,951676849 | 1,168402662 | 1,018841449 | 0,875248997 |
| 0,983971639 | 1,109258988 | 1,114748738 | 1,159869022 | 0,974711615 | 0,980132555 |
| 0,954170986 | 0,75715604  | 1,036538306 | 0,893414949 | 1,324895429 | 1,151888094 |
| 0,869829936 | 1,221220442 | 1,169252304 | 1,26294544  | 1,272555998 | 0,980939402 |
| 1,110697398 | 0,546751359 | 1,196813111 | 1,016528504 | 1,21145404  | 1,566968074 |
| 0,991756064 | 1,015020336 | 0,796090361 | 1,102338051 | 1,031982895 | 1,418294842 |
| 0,891174062 | 0,924296106 | 0,986263809 | 1,147637031 | 0,942393359 | 0,903688487 |
| 1,003463752 | 1,226152486 | 1,589685338 | 0,627133314 | 0,795000518 | 1,434648467 |
| 1,031103821 | 1,019043386 | 1,565861008 | 1,09941583  | 0,905193199 | 1,488937757 |
| 0,924088243 | 0,804190519 | 1,357329751 | 0,855845806 | 0,894325112 | 1,67185964  |



**Table S4.** Molecular/signaling characteristics of *MMTV-R26<sup>Met</sup>* MGT cells identified through RPPA analysis.

| sample    | 14-3-3-beta | 14-3-3-zeta | 4E-BP1   | 4E-BP1_pS1 | 53BP1    | A-Raf    | ACC1     | ACC_pS79 | ADAR1    | Akt      | Akt_pS473 | Akt_pT308 | AMPK-a2_r | AMPKa    |
|-----------|-------------|-------------|----------|------------|----------|----------|----------|----------|----------|----------|-----------|-----------|-----------|----------|
| MGT2 - A  | 1,061894    | 0,773692    | 0,567263 | 0,861403   | 0,787794 | 1,135853 | 0,817423 | 0,87167  | 0,942721 | 0,906558 | 0,603454  | 0,562641  | 0,870328  | 0,70348  |
| MGT2 - B  | 1,112429    | 0,780973    | 0,61677  | 1,047868   | 0,669072 | 1,210138 | 0,954432 | 1,027931 | 0,978911 | 0,876482 | 0,646971  | 0,576709  | 0,894695  | 0,898233 |
| MGT4 - A  | 0,944269    | 1,147524    | 0,939736 | 1,507674   | 1,244175 | 1,131135 | 1,381581 | 1,507208 | 1,096794 | 1,075582 | 0,829757  | 0,905952  | 1,011924  | 1,007448 |
| MGT4 - B  | 0,927013    | 1,143091    | 0,890366 | 1,447299   | 1,364928 | 1,10769  | 1,568612 | 1,475278 | 1,168686 | 1,200284 | 0,879378  | 1,02913   | 0,956247  | 0,942412 |
| MGT4 - C  | 0,957631    | 1,053998    | 0,92813  | 1,701487   | 3,502548 | 0,826835 | 1,537085 | 1,370714 | 1,135028 | 1,066843 | 1,267612  | 1,244567  | 1,006902  | 0,937592 |
| MGT7 - A  | 0,983932    | 0,817087    | 1,118397 | 0,650066   | 0,870207 | 0,872195 | 0,531382 | 0,33931  | 0,992725 | 1,013167 | 0,508949  | 0,74041   | 0,857425  | 0,679711 |
| MGT7 - B  | 0,99467     | 0,813931    | 1,060866 | 0,678065   | 0,847705 | 0,901238 | 0,549096 | 0,392927 | 0,979534 | 0,898701 | 0,576662  | 0,75749   | 0,907273  | 0,701624 |
| MGT8 - A  | 0,994884    | 0,961993    | 1,399697 | 0,845108   | 0,42008  | 1,023148 | 1,028445 | 1,049691 | 1,044992 | 1,079825 | 0,604259  | 0,684113  | 1,049691  | 0,872814 |
| MGT8 - B  | 1           | 1           | 1,356221 | 0,904133   | 0,456771 | 1        | 0,950028 | 1,157648 | 1,026418 | 1,135973 | 0,54491   | 0,656548  | 1,039683  | 0,932238 |
| MGT9 - A  | 0,963546    | 0,947508    | 1,383455 | 1,170172   | 1,580132 | 0,975289 | 1,166519 | 1,015439 | 1,07095  | 0,757149 | 0,695144  | 0,783925  | 0,936875  | 0,828407 |
| MGT9 - B  | 0,926588    | 0,904043    | 1,554455 | 1,398565   | 1,607038 | 1,034138 | 1,632789 | 1,158385 | 1,134757 | 0,827822 | 0,792719  | 0,696414  | 0,933259  | 1,016165 |
| MGT9 - C  | 0,915921    | 0,867385    | 1,406538 | 1,451486   | 2,418755 | 0,817541 | 1,219583 | 2,049206 | 1,086857 | 0,675495 | 0,762742  | 0,909713  | 0,975745  | 0,776867 |
| MGT11 - A | 0,984726    | 1,086006    | 1,117997 | 1,450093   | 2,448217 | 1,04708  | 1,0308   | 0,87808  | 1,087955 | 0,997418 | 1,178316  | 1,234289  | 0,977591  | 1,018972 |
| MGT11 - B | 1,019739    | 1,125547    | 1,103159 | 1,169476   | 2,214632 | 1,071563 | 1        | 0,769391 | 0,933606 | 0,99925  | 1,206755  | 1,304766  | 0,753278  | 0,939625 |
| MGT11 - C | 1,049403    | 1,157388    | 1,019803 | 1,194263   | 1,652744 | 1,122258 | 0,991028 | 0,591985 | 0,909742 | 1,065215 | 1,130654  | 1,194263  | 1,089954  | 1,027391 |
| MGT13 - A | 1,002599    | 1,015075    | 0,824867 | 0,934115   | 0,556838 | 0,957682 | 1,300158 | 1,641682 | 0,940843 | 0,980086 | 1,458444  | 1,367861  | 0,785139  | 1,080881 |
| MGT13 - B | 0,98377     | 0,992169    | 0,758636 | 0,892288   | 0,682954 | 0,991863 | 1,195894 | 1,514237 | 0,992976 | 0,992976 | 1,511358  | 1,389082  | 0,755205  | 1,031048 |
| MGT13 - C | 0,909464    | 0,946696    | 0,774656 | 0,983326   | 0,774656 | 0,919941 | 1,248657 | 1,442013 | 0,980087 | 0,954359 | 1,241198  | 1,169117  | 0,904467  | 0,992274 |

| AMPKa_pT | Annexin-I | Annexin-VI | AR       | ARID1A   | Atg3     | Atg7     | ATM      | ATM_pS19 | ATR_pS428 | Aurora-B | Axl      | b-Actin  | b-Catenin | b-Catenin_ |
|----------|-----------|------------|----------|----------|----------|----------|----------|----------|-----------|----------|----------|----------|-----------|------------|
| 1,185521 | 1,201896  | 0,971385   | 1,253836 | 0,953191 | 1,309958 | 0,948325 | 1,554367 | 0,997391 | 0,900957  | 0,877864 | 1,247242 | 0,981407 | 0,937762  | 0,829435   |
| 1,70488  | 1,291044  | 1,047486   | 1,255994 | 0,963976 | 1,199333 | 0,994087 | 1,351598 | 1,069209 | 0,950486  | 0,878911 | 1,194812 | 0,946358 | 1,179184  | 1,067835   |
| 0,905438 | 1,211442  | 1,025903   | 0,990556 | 1,196329 | 0,816748 | 0,843275 | 1,199663 | 0,967155 | 0,99612   | 0,972562 | 0,953189 | 1,181263 | 1,584491  | 1,044274   |
| 0,803473 | 0,929031  | 0,948913   | 0,910732 | 1,283746 | 0,879378 | 0,881532 | 1,227739 | 0,938498 | 1,103638  | 0,942057 | 0,883766 | 1,232506 | 1,60217   | 1,033801   |
| 0,779997 | 1,051156  | 1,106336   | 0,875048 | 3,111983 | 0,791852 | 0,745971 | 1,387719 | 0,923196 | 1,011579  | 1,011843 | 0,865188 | 1,005124 | 1,522636  | 1,010487   |
| 1,590474 | 1,61054   | 0,95383    | 1,00534  | 0,456977 | 1,022396 | 1,765628 | 0,610392 | 1,208691 | 0,888184  | 1,019878 | 1,30298  | 0,982012 | 0,721382  | 1,175808   |
| 1,672793 | 1,568894  | 0,907313   | 0,92069  | 0,445161 | 1,3327   | 1,74681  | 0,594609 | 1,214923 | 0,913988  | 0,857242 | 1,423572 | 1,049993 | 0,809721  | 0,937747   |
| 1,245132 | 1,049691  | 0,864323   | 0,978501 | 0,701769 | 1,082987 | 1,049691 | 0,947467 | 1,051689 | 0,737665  | 1,035074 | 1,138806 | 1,02921  | 0,873431  | 0,950814   |
| 1,254709 | 0,995527  | 0,922027   | 0,92067  | 0,643109 | 1,140186 | 1,202728 | 0,904733 | 1        | 1         | 1        | 1,188744 | 1        | 0,965574  | 0,863447   |
| 0,603922 | 1,190873  | 1,085405   | 1,025226 | 1,382848 | 0,927122 | 0,954719 | 1,085511 | 0,962209 | 1,034691  | 1,084444 | 0,930748 | 1,099959 | 1,097968  | 0,981921   |
| 0,740295 | 1,102447  | 1,136863   | 1,01899  | 1,346492 | 0,888263 | 0,963272 | 1,163242 | 0,972759 | 1,052382  | 1,07011  | 0,927136 | 1,126675 | 1,423028  | 1,077272   |
| 1,149256 | 1,207681  | 1,164739   | 1,059331 | 2,683182 | 0,860233 | 0,909617 | 1,140506 | 0,982103 | 1,151429  | 1,105967 | 0,866735 | 0,817431 | 1,218215  | 1,136989   |
| 0,915916 | 0,900549  | 1,014038   | 0,92359  | 2,154478 | 0,755984 | 1,074724 | 0,92612  | 0,96124  | 1,014636  | 1,007985 | 0,835638 | 1,400796 | 1,115006  | 1,034224   |
| 0,755229 | 0,953772  | 1          | 0,882089 | 2,041648 | 0,805057 | 1,080769 | 0,920186 | 0,948127 | 0,991537  | 0,921495 | 0,851309 | 1,345652 | 1,066787  | 1,036697   |
| 0,885351 | 1,033026  | 0,96827    | 1,114102 | 1,812168 | 0,892673 | 1,105737 | 1,021269 | 0,990947 | 1,045261  | 0,855745 | 0,732509 | 1,183896 | 1,095777  | 1,103492   |
| 2,561986 | 1,159995  | 1,005641   | 1,080881 | 0,66359  | 1,068775 | 0,938826 | 1,000923 | 0,998601 | 0,947494  | 0,96468  | 1,080881 | 0,704879 | 1,04387   | 0,972783   |
| 2,307006 | 1,130674  | 1,064119   | 1,093798 | 0,682323 | 1,153175 | 0,961801 | 1,277884 | 1,026769 | 1,006654  | 1,006273 | 1,058585 | 0,786105 | 0,992976  | 0,992976   |
| 2,02011  | 1,343256  | 1,146424   | 1,081794 | 0,797618 | 1,055499 | 0,957705 | 1,236715 | 0,978045 | 1,090488  | 0,89634  | 1,075952 | 0,800506 | 0,993869  | 0,915826   |

| B-Raf    | B-Raf_pS44 | B7-H4    | Bad_pS112 | Bak      | BAP1     | Bax      | Bcl-xL   | Bcl2     | Beclin   | Bid      | Bim      | BiP-GRP78 | BRD4     | c-Abl    |
|----------|------------|----------|-----------|----------|----------|----------|----------|----------|----------|----------|----------|-----------|----------|----------|
| 1,223895 | 1,122653   | 1,093275 | 0,715953  | 0,788362 | 1,106712 | 0,776384 | 0,90773  | 1,228027 | 1,097514 | 0,940269 | 0,562243 | 1,0739    | 1,085903 | 1,054685 |
| 1,263187 | 1,299605   | 1,038922 | 0,863188  | 1,000426 | 1,080545 | 0,824511 | 0,952034 | 1,212509 | 1,212942 | 1,038453 | 0,663213 | 1,141144  | 0,988585 | 0,978247 |
| 0,911298 | 0,999674   | 0,986017 | 1,02196   | 1,132256 | 0,984244 | 1,100969 | 1,301399 | 0,994814 | 0,998904 | 1,294361 | 1,213675 | 0,970877  | 0,901208 | 0,968297 |
| 0,890547 | 0,94544    | 0,923383 | 0,879378  | 1,009808 | 1,029548 | 1,158225 | 1,272455 | 0,898573 | 0,932397 | 1,218634 | 1,018356 | 0,940586  | 0,945037 | 0,94461  |
| 0,806031 | 0,909242   | 0,949624 | 0,941913  | 0,993773 | 1,06161  | 2,030401 | 1,300983 | 0,904936 | 0,980654 | 1,229038 | 1,913522 | 0,956481  | 0,925352 | 0,990287 |
| 1,441049 | 1,094409   | 1,35341  | 0,751802  | 0,842679 | 1,100368 | 0,890537 | 0,885517 | 1,292679 | 1,241176 | 0,710707 | 0,438936 | 1,106307  | 1,302782 | 0,947473 |
| 1,462311 | 1,126586   | 1,305622 | 0,80263   | 0,849793 | 1,121779 | 0,912509 | 0,903069 | 1,197689 | 1,191126 | 0,933045 | 0,457017 | 1,021451  | 1,269095 | 0,976518 |
| 1,049691 | 0,949161   | 1,049691 | 0,857831  | 0,94476  | 1,022725 | 1,049691 | 0,972194 | 1,229907 | 1,002519 | 0,922555 | 0,761124 | 0,96961   | 1,077753 | 0,975049 |
| 1,102289 | 1          | 1,036146 | 0,897856  | 0,992839 | 0,960582 | 1,049764 | 0,992575 | 1,076737 | 0,985896 | 0,931273 | 0,660989 | 1         | 1        | 1,023613 |
| 0,888575 | 0,819395   | 0,932112 | 0,840306  | 0,986622 | 1,187014 | 0,556608 | 1,179691 | 1,104289 | 1,094486 | 1,34763  | 1,679256 | 1,033744  | 1,05257  | 0,935164 |
| 0,901169 | 0,931554   | 0,90369  | 0,915099  | 1,033364 | 0,924522 | 0,549547 | 1,296238 | 1,045    | 0,971396 | 1,23442  | 1,842925 | 1,029991  | 0,924708 | 0,91739  |
| 0,860714 | 0,777683   | 0,880319 | 0,975612  | 0,952845 | 1,131275 | 0,738631 | 1,011163 | 1,018456 | 0,971889 | 1,266608 | 2,927673 | 1,197485  | 0,96661  | 0,874671 |
| 1,107544 | 1,101552   | 0,960834 | 0,969369  | 1,072554 | 0,984216 | 1,146002 | 1,04407  | 0,915916 | 0,93268  | 1,099471 | 0,915916 | 0,980163  | 0,928742 | 0,93396  |
| 1,096921 | 1,110234   | 0,963313 | 0,987888  | 1,0837   | 1,029418 | 1,108654 | 1        | 0,898583 | 0,963226 | 0,939826 | 0,910475 | 0,999969  | 0,86236  | 0,970433 |
| 1,076435 | 1,082559   | 1,01679  | 0,832599  | 0,895569 | 0,978529 | 1,798961 | 1,447057 | 0,999688 | 1,006147 | 0,960022 | 1,126184 | 1,060115  | 0,940154 | 0,943392 |
| 0,934995 | 1,040925   | 1,037432 | 1,107431  | 1,080881 | 1,080881 | 1,005591 | 0,936309 | 1,024269 | 1,007626 | 1,080881 | 1,123235 | 1,154693  | 0,911476 | 1,080881 |
| 0,954367 | 0,989338   | 1,050373 | 1,038536  | 0,972574 | 1,029129 | 0,957975 | 0,903081 | 0,975935 | 0,992976 | 1,089684 | 1,062812 | 1,154889  | 0,999625 | 1,048668 |
| 0,951745 | 0,956248   | 1,024682 | 0,947335  | 0,970021 | 1,237369 | 0,980283 | 0,942852 | 1,067794 | 0,999439 | 1,256913 | 1,082469 | 1,197774  | 0,986549 | 1,005466 |

| c-IAP2   | c-Jun_pS73 | c-Kit    | c-Myc    | C-Raf    | C-Raf_pS33 | Caspase-3 | Caspase-7- | Caspase-8 | Caveolin-1 | CD134    | CD171    | CD20     | CD29     | CD31     |
|----------|------------|----------|----------|----------|------------|-----------|------------|-----------|------------|----------|----------|----------|----------|----------|
| 0,918496 | 0,915004   | 0,965431 | 0,981334 | 1,060973 | 0,755835   | 0,845005  | 0,762433   | 1,032591  | 0,725523   | 1,090526 | 0,549646 | 0,981009 | 1,016369 | 1,149756 |
| 0,985704 | 0,825093   | 1,026583 | 1,004596 | 1,108643 | 0,838515   | 0,888827  | 0,977796   | 1,030803  | 0,813294   | 1,192647 | 0,667473 | 1,052061 | 1,095131 | 1,221096 |
| 1,006856 | 1,414215   | 1,247367 | 1,383655 | 0,925823 | 1,140186   | 1,245658  | 1,065583   | 0,986292  | 0,56746    | 0,951092 | 2,660234 | 0,885279 | 0,986292 | 0,986292 |
| 0,969264 | 1,328411   | 1,228554 | 1,369265 | 0,935355 | 1,101159   | 1,189247  | 0,967348   | 1,01302   | 0,694315   | 0,95584  | 2,711138 | 0,910352 | 0,991814 | 0,932483 |
| 0,944587 | 1,3567     | 1,25374  | 1,191528 | 0,818779 | 0,811215   | 1,245679  | 0,930035   | 1,013997  | 1,220556   | 0,91933  | 1,540577 | 1,028159 | 0,921287 | 1,017927 |
| 0,993856 | 0,772572   | 0,821842 | 0,76926  | 0,816171 | 0,713753   | 0,884546  | 0,783433   | 1,108251  | 1,530223   | 1,198067 | 0,875274 | 1,133996 | 1,054797 | 1,226073 |
| 0,940632 | 0,736436   | 1,004123 | 0,780173 | 0,857776 | 0,752684   | 0,862104  | 0,766404   | 1,025622  | 1,795102   | 1,12859  | 0,717977 | 1,200966 | 1,119994 | 1,11274  |
| 0,733027 | 0,683021   | 1,049691 | 0,857537 | 1,014642 | 0,789679   | 1,047712  | 0,890101   | 0,775516  | 0,645213   | 1,049691 | 1,055586 | 0,834976 | 1,070672 | 1,164585 |
| 0,842101 | 0,74754    | 0,969934 | 0,81273  | 1,020161 | 0,727341   | 0,992429  | 1          | 0,896456  | 0,76045    | 1,050497 | 1        | 0,881183 | 1,014009 | 0,980222 |
| 0,948238 | 1,073543   | 1,136085 | 1,086487 | 0,961086 | 1,111256   | 1,101896  | 1,107287   | 1,044865  | 0,761327   | 1,064826 | 1,860883 | 1,002297 | 1,081222 | 1,057558 |
| 0,93285  | 1,113618   | 1,264318 | 1,163378 | 0,999824 | 1,139243   | 1,148335  | 1,07105    | 1,021301  | 0,749057   | 1,011653 | 1,548518 | 0,89484  | 1,086711 | 1,060554 |
| 0,958213 | 1,146458   | 1,243732 | 1,398914 | 0,882411 | 1,034489   | 1,240448  | 1,049541   | 1,010132  | 0,93624    | 0,967422 | 0,935968 | 0,906305 | 1,094001 | 1,071474 |
| 0,961363 | 1,442785   | 1,22678  | 1,392995 | 1,077933 | 1,259473   | 1,184421  | 0,887453   | 1,064392  | 1,555904   | 1,007012 | 1,495574 | 1,043424 | 0,945704 | 0,996692 |
| 1        | 1,416055   | 1,192656 | 1,230252 | 1,076432 | 1,308681   | 1         | 0,786909   | 1,05565   | 1,317761   | 0,958718 | 1,28488  | 1,007253 | 0,923796 | 0,966162 |
| 0,998445 | 1,526874   | 1,09416  | 1,271842 | 1,116935 | 1,328125   | 1,23835   | 0,842088   | 0,991184  | 1,425577   | 1,082599 | 1,097235 | 0,986934 | 0,976464 | 1,053898 |
| 0,972557 | 0,851241   | 0,977723 | 0,66138  | 0,975072 | 0,780106   | 1,033268  | 1,089097   | 0,99442   | 1,138974   | 1,053163 | 0,736265 | 1,080881 | 0,977647 | 1,038482 |
| 1,027664 | 0,812849   | 0,979864 | 0,800291 | 0,992976 | 0,783123   | 0,978493  | 1,017177   | 1,051798  | 1,114052   | 1,080679 | 0,741673 | 1,101653 | 0,970309 | 0,997811 |
| 0,932693 | 0,774656   | 1,073687 | 0,774656 | 0,966109 | 0,774656   | 1,081962  | 1,069246   | 1,064767  | 1,31035    | 1,125949 | 0,8858   | 1,12156  | 1,021588 | 1,081539 |

| CD4      | CD44     | CD45     | CD49b    | cdc25C   | Cdc2_pY15 | CDK1     | Chk1     | Chk1_pS29 | Chk2     | Chk2_pT68 | Claudin-7 | COG3     | Collagen-VI | Connexin-4 |
|----------|----------|----------|----------|----------|-----------|----------|----------|-----------|----------|-----------|-----------|----------|-------------|------------|
| 1,054569 | 1,156142 | 0,87791  | 1,094281 | 1,091421 | 1,119051  | 0,679159 | 1,013519 | 1,020439  | 1,208509 | 0,956695  | 0,856098  | 0,883873 | 1,108526    | 1,235065   |
| 1,24642  | 1,273873 | 0,949786 | 1,136502 | 1,305345 | 1,214552  | 0,723676 | 1,021771 | 0,999038  | 0,812163 | 0,898052  | 0,911448  | 0,909355 | 1,1315      | 1,270129   |
| 0,99876  | 0,972213 | 1,000326 | 0,986292 | 0,986292 | 1,22034   | 0,986292 | 1,18238  | 0,967123  | 1,026179 | 1,117705  | 2,315467  | 0,986292 | 0,975158    | 1,481903   |
| 0,96519  | 0,936561 | 0,979238 | 0,995671 | 1,034419 | 1,160656  | 0,987957 | 1,254243 | 0,990695  | 1,009955 | 1,029038  | 3,334419  | 1,032629 | 0,940488    | 1,720383   |
| 0,887411 | 0,899102 | 0,971245 | 0,98271  | 1,026712 | 0,882868  | 1,007773 | 0,965172 | 0,93115   | 0,863175 | 1,020861  | 2,344901  | 0,902623 | 0,899291    | 1,704662   |
| 1,217415 | 1,002184 | 1,028723 | 1,119491 | 1,583479 | 0,694923  | 0,306231 | 0,463791 | 0,898834  | 0,782855 | 0,872164  | 0,770352  | 0,910367 | 1,528199    | 0,456565   |
| 1,444363 | 1,037082 | 1,005342 | 1,091464 | 1,17282  | 0,800371  | 0,298313 | 0,48533  | 0,824335  | 1,047917 | 0,783591  | 0,853184  | 0,988663 | 1,488683    | 0,481463   |
| 0,936586 | 1,059205 | 0,893725 | 0,919568 | 0,8307   | 0,931704  | 0,504302 | 0,672942 | 1,093122  | 0,927269 | 0,964739  | 0,782536  | 1,29849  | 1,327711    | 0,87747    |
| 0,952029 | 1        | 0,973673 | 0,972169 | 0,724317 | 0,803935  | 0,520009 | 0,619492 | 1         | 0,947297 | 0,863914  | 0,781457  | 1,231626 | 1,230031    | 0,817406   |
| 1,048041 | 1,040862 | 0,919445 | 1,050734 | 1,400052 | 1,095157  | 1,871809 | 1,501789 | 0,978244  | 0,986051 | 1,0665    | 4,392841  | 0,821603 | 0,874927    | 0,983482   |
| 1,065106 | 0,910997 | 0,934149 | 0,99722  | 1,257571 | 1,14301   | 1,945243 | 1,643339 | 0,992789  | 0,877241 | 1,079381  | 4,899628  | 0,789282 | 0,897729    | 1,12155    |
| 1,00969  | 0,953311 | 0,9413   | 0,991803 | 1,250954 | 1,043432  | 2,010503 | 1,13687  | 0,976404  | 0,955154 | 1,125934  | 3,139896  | 0,873801 | 1,109596    | 1,094807   |
| 0,948852 | 0,938507 | 0,992838 | 1,001657 | 0,966655 | 1,134977  | 1,074393 | 1,342958 | 1,065175  | 0,936922 | 0,915916  | 3,203973  | 0,646992 | 0,888274    | 2,037159   |
| 1        | 0,960823 | 1,021155 | 1,016026 | 0,961259 | 1,077636  | 1,129241 | 1,285354 | 1,012707  | 1        | 0,851877  | 3,450831  | 0,682471 | 0,829465    | 1,775288   |
| 1,052103 | 0,979011 | 0,93914  | 1,05022  | 0,968211 | 0,978439  | 0,892918 | 1,194263 | 0,909112  | 0,819878 | 1,054151  | 2,478599  | 0,693404 | 0,867176    | 1,283      |
| 1,011019 | 1,046445 | 1,0309   | 0,990018 | 1,158557 | 1,055513  | 1,182665 | 1,016582 | 0,917577  | 0,773799 | 1,116169  | 0,747267  | 1,080728 | 1,080881    | 0,887749   |
| 1,060756 | 1,075204 | 0,992976 | 0,993172 | 1,096662 | 1,101007  | 1,221405 | 1,005941 | 0,940664  | 1,054793 | 1,052724  | 0,782416  | 1,133272 | 1,046374    | 0,910616   |
| 1,098075 | 1,01595  | 1,008754 | 0,964227 | 1,224113 | 1,052534  | 1,158359 | 0,96216  | 1,044675  | 1,064677 | 1,034637  | 0,774656  | 1,211025 | 1,350151    | 0,774656   |

| Cox-IV   | Cox2     | Creb     | Cyclin-B1 | Cyclin-D1 | Cyclin-D3 | Cyclin-E1 | Cyclophilin | D-a-Tubulin | DJ1      | DM-Histon | DM-K9-Hist | DUSP4    | E-Cadherin | E2F1     |
|----------|----------|----------|-----------|-----------|-----------|-----------|-------------|-------------|----------|-----------|------------|----------|------------|----------|
| 1,259658 | 1,988633 | 1,079824 | 1,259658  | 0,913282  | 1,012924  | 1,372787  | 0,772436    | 0,952351    | 0,985684 | 1,134366  | 0,954825   | 1,191387 | 1,259658   | 0,997629 |
| 1,423938 | 2,028096 | 1,03356  | 1,423938  | 0,94692   | 1,04469   | 1,481766  | 0,713809    | 1,126583    | 0,910307 | 1,203545  | 0,984739   | 1,237066 | 0,549113   | 1,071426 |
| 0,986292 | 3,114737 | 1,031419 | 0,986292  | 1,082751  | 0,838091  | 0,934767  | 1,283673    | 0,986138    | 1,209065 | 1,019721  | 1,039302   | 0,968439 | 7,083806   | 0,903782 |
| 0,879378 | 3,721234 | 0,999428 | 0,886247  | 1,016372  | 0,859479  | 1,019574  | 1,30328     | 0,997754    | 1,168636 | 0,968357  | 1,110661   | 0,962396 | 7,167034   | 0,966766 |
| 0,785413 | 4,855096 | 1,028977 | 0,945779  | 1,066268  | 1,018029  | 1,016799  | 1,176528    | 0,927183    | 1,060958 | 0,867055  | 1,005652   | 1,100587 | 5,058402   | 0,90793  |
| 2,462769 | 0,596399 | 1,126611 | 2,462769  | 1,025772  | 1,496313  | 0,751172  | 0,734717    | 0,91303     | 0,918757 | 1,267385  | 0,867975   | 0,937578 | 0,550883   | 1,1033   |
| 2,399087 | 0,578169 | 1,109842 | 2,399087  | 0,947781  | 1,523119  | 0,743736  | 0,768799    | 0,970575    | 0,933136 | 1,318301  | 0,774962   | 0,849922 | 0,23153    | 1,176469 |
| 1,049691 | 0,704906 | 0,970748 | 1,049691  | 1,019449  | 1,121982  | 1,045211  | 0,970245    | 1,150102    | 0,97709  | 0,898029  | 0,994254   | 1,169614 | 0,393104   | 1,070575 |
| 1        | 0,702912 | 1        | 1         | 1,029775  | 1,120704  | 0,990351  | 0,869159    | 1,096888    | 0,920665 | 0,92974   | 1          | 1,166206 | 0,381053   | 0,983255 |
| 0,924905 | 0,678607 | 1,071419 | 1,063756  | 0,975416  | 0,929494  | 0,906028  | 1,463037    | 0,927157    | 1,008225 | 1,054112  | 0,975784   | 1,238182 | 7,791182   | 0,929933 |
| 0,874874 | 0,704746 | 0,951422 | 1,005142  | 0,921767  | 0,965994  | 0,935639  | 1,470465    | 0,893199    | 1,0279   | 1,045079  | 1,004843   | 1,144523 | 7,934911   | 0,963552 |
| 0,913219 | 3,605096 | 1,02977  | 0,883853  | 1,147938  | 0,863879  | 0,908661  | 4,282414    | 0,957046    | 1,134866 | 1,098194  | 1,009627   | 1,329485 | 5,972277   | 0,901221 |
| 0,915916 | 1,934289 | 1,000329 | 0,915916  | 1,027073  | 0,809139  | 0,961172  | 1,301101    | 0,998349    | 1,216465 | 1,037937  | 1,08102    | 0,963477 | 4,756514   | 1,042183 |
| 1        | 1,736373 | 1,003905 | 1         | 1         | 0,778285  | 1,086849  | 1,291978    | 1           | 1,257844 | 0,978589  | 0,995876   | 1        | 4,99747    | 1,035708 |
| 1,194263 | 1,130383 | 1,048785 | 1,194263  | 0,938969  | 0,846362  | 0,992894  | 1,218944    | 1,017813    | 1,194263 | 1,00798   | 0,949856   | 0,973502 | 4,687067   | 0,955489 |
| 1,080881 | 0,437708 | 0,999077 | 1,080881  | 0,846108  | 1,143854  | 0,996177  | 0,642598    | 0,953935    | 0,91396  | 1,080881  | 0,902855   | 0,888867 | 0,322478   | 0,983665 |
| 1,061161 | 0,435655 | 0,972379 | 1,102001  | 0,938588  | 1,197092  | 0,992976  | 0,72565     | 0,976142    | 0,955822 | 1,07933   | 0,997234   | 0,87817  | 0,346751   | 0,992976 |
| 0,964792 | 0,397165 | 1,021848 | 1,0646    | 0,895951  | 1,132812  | 1,027922  | 0,824453    | 0,929883    | 1,031285 | 1,163898  | 0,991589   | 0,877525 | 0,300729   | 1,064934 |

| eEF2     | eEF2K    | EGFR     | EGFR_pY11 | eIF4E    | eIF4E_pS20 | eIF4G    | Elk1_pS38 | ERK5     | ENY2     | ER       | ER-a_pS11 | ERCC1    | ERCC5    | Ets-1    |
|----------|----------|----------|-----------|----------|------------|----------|-----------|----------|----------|----------|-----------|----------|----------|----------|
| 1,240016 | 1,138301 | 0,905569 | 0,846762  | 0,787259 | 1,098051   | 0,888196 | 0,796644  | 1,259658 | 1,109659 | 1,137187 | 0,949187  | 0,886022 | 0,845669 | 1,069425 |
| 1,066032 | 0,967526 | 0,79218  | 0,942356  | 0,753642 | 1,122609   | 0,918481 | 0,93772   | 1,278522 | 1,166643 | 1,215817 | 0,979048  | 0,951081 | 0,768567 | 1,075157 |
| 1,174564 | 0,915655 | 1,009269 | 1,037564  | 0,972674 | 0,986292   | 1,086214 | 1,077293  | 1,031009 | 1,010436 | 1,021575 | 1,228792  | 1,125016 | 0,917006 | 1,072077 |
| 1,295604 | 1,090285 | 1,000572 | 1,01711   | 1,044555 | 0,980039   | 1,068552 | 1,027935  | 0,939262 | 0,962703 | 0,953965 | 1,193922  | 1,075943 | 0,879378 | 1,062635 |
| 1,12807  | 1,286046 | 0,972334 | 1,048398  | 0,998241 | 0,958576   | 1,079686 | 1,0471    | 0,878272 | 0,864917 | 0,954116 | 1,282801  | 0,866739 | 1,061614 | 1,000162 |
| 0,765886 | 1,269658 | 0,775098 | 0,856312  | 0,722217 | 1,013625   | 0,909117 | 0,879009  | 0,867827 | 0,727736 | 1,150272 | 1,04224   | 1,028134 | 1,277025 | 1,012491 |
| 0,770799 | 1,236827 | 1,022445 | 0,883854  | 0,715981 | 0,871494   | 1,040045 | 0,862913  | 0,980447 | 0,713497 | 1,166466 | 0,99283   | 1,046081 | 1,227056 | 0,974033 |
| 1,050182 | 1,696561 | 1,031656 | 0,934935  | 1,053007 | 1,04242    | 0,932422 | 0,874211  | 1,035197 | 1,022496 | 1,040964 | 0,893406  | 0,852761 | 1,141719 | 0,997978 |
| 1        | 1,722976 | 1        | 0,941435  | 1,037225 | 1,055293   | 0,944024 | 0,850709  | 1,086355 | 1        | 1        | 0,824356  | 1        | 1,137644 | 0,945865 |
| 1,1544   | 1,563629 | 1,000628 | 0,999372  | 1,151288 | 1,080773   | 0,959125 | 0,927984  | 1,225343 | 1,094041 | 1,121031 | 1,118101  | 0,973648 | 1,112793 | 1,020349 |
| 1,334161 | 1,375525 | 0,942029 | 1,01332   | 1,188548 | 0,990034   | 1,054065 | 1,010291  | 1,138718 | 1,152744 | 1,03436  | 1,182157  | 1,00265  | 0,839628 | 1,015104 |
| 0,913071 | 1,251005 | 1,094976 | 0,93948   | 1,179872 | 1,08105    | 1,038902 | 0,978365  | 1,139986 | 0,813274 | 1,035461 | 1,247337  | 0,924404 | 0,984333 | 0,994598 |
| 0,942961 | 1,112393 | 0,932877 | 1,031285  | 0,973771 | 1,02983    | 1,070264 | 1,016025  | 0,881356 | 0,937824 | 1,017144 | 1,167598  | 1,065507 | 0,921984 | 1,022081 |
| 0,927063 | 1        | 0,924729 | 1         | 1        | 1,018788   | 1,060021 | 1,035811  | 0,954738 | 1,040266 | 0,994351 | 1,069857  | 1,134333 | 0,927598 | 1,064196 |
| 0,87363  | 0,751671 | 1,005128 | 1,038947  | 0,99787  | 1,031804   | 1,194263 | 0,96829   | 0,781894 | 0,879845 | 0,98799  | 1,105752  | 0,925828 | 0,821037 | 1,081821 |
| 0,790432 | 0,853512 | 0,581879 | 1,004013  | 0,925466 | 0,971105   | 0,904357 | 0,98689   | 1,15452  | 0,937908 | 0,985812 | 0,89951   | 0,772486 | 1,07104  | 1,008247 |
| 0,978805 | 0,799856 | 0,828141 | 1,007065  | 0,940163 | 0,934215   | 0,945456 | 0,992976  | 1,209702 | 0,920567 | 1,00193  | 0,992976  | 0,964257 | 1,050227 | 0,992976 |
| 0,900654 | 1,127506 | 0,834724 | 0,96474   | 0,88562  | 0,920009   | 0,86132  | 0,948355  | 1,335755 | 0,793471 | 0,940001 | 1,051963  | 0,911074 | 1,336473 | 0,961262 |

| FAK      | FAK_pY397 | FASN     | Fibronectin | FoxM1    | FoxO3a   | FoxO3a-p | G6PD     | Gab2     | GATA3    | GATA6    | GCLM     | GCN5L2   | Glutamate | Glutaminase |
|----------|-----------|----------|-------------|----------|----------|----------|----------|----------|----------|----------|----------|----------|-----------|-------------|
| 0,762542 | 1,196141  | 0,810006 | 1,037631    | 1,137089 | 1,111002 | 0,871278 | 1,066818 | 0,643284 | 1,114531 | 0,843342 | 1,080801 | 0,859535 | 0,914201  | 1,081074    |
| 0,792806 | 1,275762  | 0,698052 | 1,304073    | 0,942205 | 1,177071 | 0,927761 | 0,984575 | 0,66633  | 1,153312 | 0,95854  | 0,979908 | 1,048417 | 0,918305  | 1,117758    |
| 1,03781  | 0,741775  | 1,202837 | 0,976896    | 0,96187  | 0,986501 | 0,986292 | 0,988248 | 1,410846 | 1,021905 | 0,981726 | 1,013243 | 1,104967 | 1,112667  | 0,997246    |
| 0,996049 | 0,830999  | 1,211248 | 0,879378    | 1,009688 | 1,017541 | 0,940346 | 0,900315 | 1,449647 | 1,042395 | 0,915931 | 0,982869 | 1,135906 | 1,075933  | 0,976334    |
| 1,141812 | 0,753227  | 1,003459 | 1,336248    | 0,937699 | 0,912997 | 0,986162 | 0,613331 | 1,202452 | 1,149242 | 0,77123  | 1,015702 | 1,348467 | 1,048482  | 0,817721    |
| 0,739792 | 1,521569  | 0,412473 | 1,27562     | 1,187182 | 1,080331 | 0,933468 | 0,974743 | 1,385018 | 0,83044  | 0,962548 | 0,888547 | 0,662072 | 1,195354  | 1,647547    |
| 0,888473 | 1,507928  | 0,470903 | 1,16704     | 0,975707 | 1,131682 | 0,880296 | 1,300572 | 1,384154 | 0,908661 | 0,967203 | 0,933011 | 0,581375 | 1,209507  | 1,705061    |
| 0,860803 | 2,057431  | 0,612523 | 1,14058     | 1,131857 | 0,984084 | 0,938987 | 1,120574 | 1,403426 | 1,049691 | 0,933549 | 1,081153 | 0,716654 | 1,049691  | 1,319355    |
| 0,929069 | 2,080686  | 0,769715 | 1,144729    | 1,039947 | 0,938808 | 0,952774 | 1,050601 | 1,471    | 0,981223 | 1        | 1        | 0,795436 | 1,049945  | 1,334861    |
| 0,909992 | 1,578856  | 1,081749 | 0,380105    | 0,959591 | 0,895472 | 0,912026 | 0,883376 | 1,050415 | 1,291561 | 0,781301 | 1,012958 | 1,366199 | 0,949509  | 0,678607    |
| 0,972936 | 1,515036  | 1,151841 | 0,360354    | 0,902927 | 0,87463  | 0,921141 | 0,951594 | 1,075868 | 1,227786 | 0,796235 | 0,991609 | 1,439041 | 0,979275  | 0,691577    |
| 1,129294 | 0,790125  | 0,978201 | 0,88207     | 0,918045 | 0,961057 | 0,965967 | 0,867297 | 1,315301 | 1,447523 | 0,829221 | 1,070633 | 1,489573 | 1,102235  | 0,621001    |
| 1,015796 | 2,094     | 1,075027 | 1,782758    | 0,882038 | 1,069413 | 0,996682 | 0,911175 | 0,98591  | 0,978533 | 0,873067 | 1,002312 | 1,451161 | 0,975904  | 0,951769    |
| 1,034434 | 2,055549  | 1,092571 | 1,502065    | 1        | 1,076498 | 0,962462 | 0,959675 | 0,971543 | 0,983761 | 0,866174 | 0,993383 | 1,430573 | 0,892893  | 0,984287    |
| 1,067356 | 1,194263  | 0,84012  | 1,07104     | 0,813077 | 0,957962 | 0,97451  | 0,921616 | 0,535427 | 0,990592 | 0,819824 | 1,016872 | 1,194263 | 0,899856  | 1,001292    |
| 0,923132 | 0,875055  | 0,968705 | 3,653135    | 1,044375 | 0,986787 | 0,99173  | 1,018443 | 0,407522 | 1,066194 | 1,10034  | 0,980343 | 0,827587 | 0,848751  | 1,008263    |
| 0,992976 | 0,886009  | 1,097244 | 2,848528    | 1,042575 | 0,992976 | 1,020374 | 0,998626 | 0,451903 | 1,097291 | 1,051942 | 0,970851 | 0,947641 | 0,873616  | 1,019516    |
| 0,95096  | 0,788544  | 1,025306 | 4,212246    | 0,973587 | 1,034699 | 0,986574 | 0,998194 | 0,435635 | 1,051219 | 1,062311 | 0,965957 | 0,86547  | 0,917381  | 0,908475    |



| Granzyme- | GSK-3a-b | GSK-3a-b_γ | Gys      | Gys_pS641 | H2AX_pS14 | HER2     | HER2_pY12 | HER3     | HER3_pY12 | Heregulin | HES1     | Hexokinase | Hif-1-alpha | Histone-H3 |
|-----------|----------|------------|----------|-----------|-----------|----------|-----------|----------|-----------|-----------|----------|------------|-------------|------------|
| 1,311703  | 1,012587 | 0,828409   | 1,066764 | 1,035103  | 0,899889  | 1,243608 | 0,770454  | 0,934409 | 0,870773  | 1,607701  | 0,483372 | 0,976377   | 1,140818    | 0,802812   |
| 1,279028  | 1,061349 | 0,901366   | 1,104995 | 0,990326  | 0,873729  | 1,153921 | 0,800021  | 0,941719 | 0,853943  | 1,67842   | 0,481514 | 1,009066   | 1,273751    | 0,867021   |
| 0,765757  | 1,026143 | 1,123733   | 0,826931 | 0,80756   | 0,986292  | 1,326283 | 1,251007  | 1,545014 | 1,035516  | 0,828693  | 2,176057 | 0,981651   | 0,986292    | 0,995125   |
| 0,814977  | 0,986318 | 1,083039   | 0,790138 | 0,879378  | 1,038741  | 1,291541 | 1,274349  | 1,534707 | 1,042704  | 0,890163  | 2,104699 | 0,9552     | 0,965294    | 0,984859   |
| 0,924733  | 0,967438 | 1,113762   | 0,88038  | 0,915345  | 0,981348  | 0,888933 | 1,156152  | 1,190292 | 1,055818  | 1,275605  | 2,703425 | 0,876117   | 0,940594    | 1,312241   |
| 1,466264  | 1,222176 | 1,298561   | 2,01477  | 1,738773  | 0,823398  | 0,695391 | 0,893566  | 1,145377 | 1,171408  | 0,887748  | 0,850235 | 1,37076    | 1,227999    | 0,856412   |
| 1,566259  | 0,999519 | 1,315297   | 1,991356 | 1,738359  | 0,810435  | 0,688566 | 0,978483  | 1,013578 | 1,194764  | 0,884112  | 0,844202 | 1,279147   | 1,176065    | 0,834267   |
| 1,485874  | 1,049691 | 0,868171   | 1,234322 | 1,109224  | 0,986032  | 0,950573 | 1,007623  | 0,841076 | 0,994528  | 1,109324  | 1,003608 | 0,964492   | 0,966512    | 0,68668    |
| 1,326697  | 0,967983 | 0,870835   | 1,291186 | 1,176551  | 1,003537  | 0,941285 | 1,032242  | 0,859457 | 1         | 1,039001  | 0,886914 | 0,962952   | 0,971495    | 0,709353   |
| 0,809318  | 0,836527 | 0,682319   | 0,792118 | 0,822421  | 0,901464  | 1,242881 | 1,373902  | 2,025411 | 0,951749  | 0,742183  | 0,792269 | 0,972488   | 1,134741    | 1,290188   |
| 0,756066  | 0,872785 | 0,720675   | 0,749057 | 0,833574  | 0,93051   | 1,346344 | 1,379385  | 1,904472 | 1,036636  | 0,749057  | 0,811372 | 0,953873   | 1,007983    | 1,104881   |
| 0,914552  | 0,783439 | 0,817611   | 0,803345 | 0,8398    | 0,988248  | 0,940895 | 0,789941  | 1,655316 | 0,877923  | 0,67886   | 1,033503 | 1,022391   | 1,069016    | 1,455678   |
| 0,801994  | 0,977255 | 1,112029   | 0,715559 | 0,757128  | 0,989766  | 1,053359 | 1,036553  | 1,402503 | 0,991732  | 0,934402  | 0,915916 | 1,005304   | 0,964894    | 0,947744   |
| 0,793574  | 0,974201 | 1,100623   | 0,74268  | 0,773634  | 1,033764  | 1,059629 | 0,994603  | 1,333759 | 0,968128  | 0,958712  | 0,940872 | 0,966237   | 1,02826     | 1          |
| 0,737215  | 1,018895 | 1,194263   | 0,786783 | 0,825191  | 1,048297  | 0,990721 | 0,925277  | 1,194263 | 0,989645  | 0,799143  | 1,150739 | 0,911964   | 1,027755    | 0,859499   |
| 1,080881  | 1,043228 | 1,120672   | 1,245169 | 0,995294  | 0,958844  | 1,080881 | 1,080881  | 0,854295 | 0,949158  | 0,793918  | 1,873081 | 1,080881   | 1,058965    | 0,831517   |
| 1,217441  | 1,008575 | 1,155399   | 1,272453 | 1,03852   | 0,969792  | 1,05558  | 1,216846  | 0,888925 | 1,038393  | 0,796336  | 2,043334 | 1,067453   | 1,064798    | 1,073433   |
| 1,2285    | 1,02552  | 1,07909    | 1,186726 | 1,049318  | 0,934899  | 1,039629 | 1,207428  | 0,906789 | 0,96971   | 0,832813  | 2,012099 | 1,032533   | 1,051862    | 0,993721   |

| HLA-DR-DP | HSP27    | HSP27_pS8 | HSP70    | IGF1R_pY1 | IGFBP2   | IGFRb    | INPP4b   | IR-b     | IRF-1    | IRS1     | Jagged1  | Jak2     | JNK2     | JNK_pT183 |
|-----------|----------|-----------|----------|-----------|----------|----------|----------|----------|----------|----------|----------|----------|----------|-----------|
| 0,896759  | 1,05974  | 1,101863  | 0,861499 | 0,864816  | 1,037606 | 0,707453 | 1,078832 | 0,719394 | 1,07267  | 1,160839 | 0,877804 | 1,021255 | 1,0087   | 0,934006  |
| 0,96042   | 1,110337 | 1,410483  | 0,941684 | 0,946026  | 1,236771 | 0,783126 | 1,112324 | 0,652075 | 1,127715 | 1,216245 | 0,857484 | 1,072637 | 1,041098 | 0,998093  |
| 0,986292  | 0,984472 | 1,018431  | 1,034085 | 0,969291  | 0,977155 | 0,781153 | 1,002853 | 0,986292 | 1,099876 | 1,474196 | 1,324285 | 0,948607 | 1,078275 | 1,03866   |
| 0,971678  | 0,945253 | 1,074139  | 1,005809 | 0,977078  | 0,997982 | 0,805757 | 0,961954 | 0,937932 | 1,11047  | 1,462553 | 1,309458 | 0,902246 | 1,202202 | 1,085179  |
| 0,989732  | 0,910932 | 0,76501   | 0,971697 | 1,020121  | 0,934737 | 0,665644 | 0,937318 | 1,062646 | 0,947043 | 1,999185 | 1,471895 | 0,998334 | 1,05457  | 0,919787  |
| 1,114195  | 1,292416 | 1,850525  | 0,8511   | 1,155188  | 1,039969 | 1,397669 | 1,05622  | 1,132482 | 1,10091  | 0,616654 | 1,145361 | 1,107786 | 0,957664 | 1,153113  |
| 1,105568  | 1,169192 | 1,578925  | 0,842047 | 1,06112   | 0,806968 | 1,376594 | 1,180301 | 1,333261 | 1,033303 | 0,700103 | 1,141185 | 1,141128 | 1,024102 | 1,216773  |
| 0,82059   | 1,037078 | 1,238832  | 1,035557 | 0,917146  | 0,642351 | 1,053945 | 0,964616 | 1,005702 | 0,980884 | 0,914997 | 0,94966  | 1,114348 | 0,911499 | 1,042238  |
| 0,891701  | 0,978892 | 1,070562  | 1        | 0,886021  | 0,776586 | 1,037007 | 1        | 1,023517 | 1        | 0,905795 | 1        | 1,162812 | 0,935971 | 1         |
| 0,976916  | 0,963118 | 0,923458  | 1,16126  | 1,06846   | 1,017639 | 0,842598 | 0,989761 | 1,494401 | 1,030356 | 0,745362 | 0,911424 | 0,988365 | 0,924897 | 1,130563  |
| 0,95837   | 0,991288 | 0,975102  | 1,201655 | 1,074157  | 1,006415 | 0,898003 | 0,968127 | 1,437409 | 1,034645 | 0,749057 | 0,902065 | 1,096815 | 1,011477 | 1,133961  |
| 0,94025   | 1,025949 | 0,933546  | 1,126558 | 1,016103  | 0,915439 | 0,708788 | 0,993329 | 1,43052  | 1,051343 | 0,901679 | 0,817691 | 1,046179 | 0,944939 | 0,869666  |
| 1,001413  | 0,941154 | 0,915916  | 1,123343 | 1,002632  | 1,16021  | 0,784093 | 0,963942 | 0,943696 | 1,036191 | 1,734534 | 1,249861 | 0,915916 | 0,956424 | 1,088826  |
| 1,013277  | 1,007324 | 0,987169  | 1,07797  | 1         | 1,007688 | 0,753999 | 0,91908  | 0,958699 | 0,969949 | 1,702839 | 1,210785 | 0,925651 | 0,91354  | 1,028002  |
| 0,911345  | 1,070272 | 1,177571  | 1,10313  | 0,90812   | 0,748446 | 0,695339 | 0,905544 | 0,915111 | 0,973192 | 1,519723 | 1,000312 | 1,042953 | 0,934592 | 1,008635  |
| 1,06495   | 1,080881 | 0,876699  | 0,76536  | 1,30274   | 1,126967 | 2,163686 | 0,92218  | 1,113609 | 0,953675 | 0,770392 | 0,805412 | 0,973971 | 0,943849 | 0,94903   |
| 1,058231  | 1,000264 | 0,901644  | 0,63489  | 1,309727  | 0,992976 | 2,257407 | 0,995766 | 1,181735 | 0,940633 | 0,801736 | 0,816817 | 1,008463 | 0,992976 | 0,955506  |
| 1,006531  | 1,000431 | 0,947274  | 0,809376 | 1,213346  | 1,082695 | 2,217586 | 0,982669 | 1,506156 | 1,031972 | 0,833949 | 0,834277 | 0,93048  | 1,004341 | 0,953183  |

| LC3A-B   | Lck      | LDHA     | LRP6_pS14 | MAPK_pT2 | Mcl-1    | MCT4     | MDM2_pS: | MEK1     | MEK1_pS2: | MERIT40_c | Merlin   | MIF      | MIG6     | MMP2     |
|----------|----------|----------|-----------|----------|----------|----------|----------|----------|-----------|-----------|----------|----------|----------|----------|
| 0,914505 | 0,947561 | 1,097064 | 0,881259  | 0,813867 | 1,263939 | 0,636594 | 0,839038 | 1,29878  | 0,96309   | 0,900957  | 1,026067 | 1,055924 | 0,981191 | 1,032118 |
| 0,891237 | 0,972464 | 1,423938 | 0,918077  | 0,823666 | 1,335978 | 0,556306 | 0,908626 | 1,196825 | 0,904556  | 1,202905  | 0,888626 | 1,110797 | 0,981025 | 1,069618 |
| 0,886561 | 1,143672 | 1,057241 | 0,959064  | 1,173354 | 0,928047 | 0,685915 | 0,97418  | 0,971572 | 1,085309  | 0,955982  | 0,791671 | 1,027109 | 0,984935 | 1,073193 |
| 0,879378 | 1,18811  | 0,884431 | 0,938115  | 1,19477  | 0,879378 | 0,64045  | 0,969209 | 1,214176 | 1,074462  | 0,936733  | 0,94119  | 0,959185 | 0,995142 | 1,030937 |
| 1,116291 | 1,487838 | 0,870414 | 0,926187  | 1,036807 | 0,705679 | 0,897716 | 0,954171 | 1,275356 | 1,064064  | 0,862393  | 1,199554 | 0,853108 | 0,999838 | 1,053517 |
| 1,94076  | 0,919758 | 1,697672 | 0,944609  | 0,938551 | 0,993564 | 2,511424 | 0,876044 | 1,850695 | 0,91616   | 1,343773  | 0,921504 | 1,197281 | 0,922639 | 1,046428 |
| 1,978578 | 0,839831 | 1,653773 | 0,932661  | 1,050316 | 1,07514  | 2,473769 | 0,851767 | 1,802839 | 0,906297  | 0,954732  | 0,855076 | 1,170437 | 0,934643 | 1,085224 |
| 1,235996 | 1,00114  | 0,723588 | 1,0612    | 0,820385 | 1,045603 | 1,828918 | 1,037531 | 0,824009 | 0,982973  | 1,050247  | 0,890142 | 1,049691 | 0,99495  | 0,955835 |
| 1,391551 | 1,061959 | 0,739739 | 1         | 0,803335 | 1,02532  | 2,325304 | 1,017689 | 0,796443 | 0,967706  | 1         | 1,102457 | 1,060962 | 1        | 1        |
| 1,082416 | 1,042357 | 1,088081 | 0,859904  | 0,757636 | 1,28532  | 0,678607 | 0,776389 | 1,284103 | 0,97594   | 0,967376  | 1,2103   | 0,856395 | 1,026565 | 1,007691 |
| 1,086228 | 1,071496 | 0,929814 | 0,869119  | 0,749057 | 1,390475 | 0,631849 | 0,819903 | 1,236984 | 0,988924  | 1,014425  | 1,248579 | 0,866837 | 1,053377 | 1,032615 |
| 1,00872  | 1,042248 | 1,04609  | 0,796018  | 0,705109 | 0,970909 | 0,691808 | 0,782271 | 1,062206 | 1,042265  | 0,998754  | 1,296272 | 0,89282  | 1,109676 | 1,043149 |
| 0,921694 | 1,113745 | 0,952829 | 0,972482  | 0,963089 | 0,655787 | 0,454252 | 0,977404 | 0,937888 | 1,052953  | 0,93747   | 0,915916 | 1,028448 | 1,038142 | 1,036368 |
| 0,938523 | 0,983491 | 0,689334 | 0,90037   | 0,894234 | 0,647882 | 0,468354 | 0,999256 | 1        | 1,000481  | 0,898529  | 1,173957 | 0,995982 | 1,077273 | 0,972589 |
| 0,881747 | 0,974678 | 0,823247 | 0,829245  | 0,977089 | 0,903511 | 0,386696 | 0,843973 | 0,995266 | 1,11559   | 1,069017  | 1,250372 | 0,930804 | 1,137435 | 1,033977 |
| 0,975295 | 0,96567  | 1,270841 | 1,405657  | 1,119624 | 1,463317 | 1,651212 | 0,763097 | 1,28465  | 0,905754  | 1,057717  | 0,628192 | 0,925212 | 0,978291 | 0,980238 |
| 0,987455 | 0,992976 | 1,239993 | 1,485759  | 1,180339 | 1,536869 | 1,720575 | 0,992976 | 1,253552 | 0,992976  | 1,113013  | 0,624711 | 0,930508 | 1,019689 | 0,971601 |
| 0,906373 | 1,105087 | 1,176899 | 1,501659  | 1,023984 | 1,388217 | 1,93326  | 0,867747 | 1,389404 | 0,975128  | 1,060261  | 0,788788 | 0,911951 | 0,97334  | 0,931438 |

| Mnk1     | MSH6     | MSI2     | mTOR     | mTOR_pS2 | Myosin-He | Myosin-IIa_ | Myt1     | N-Cadherin | N-Ras    | NAPSIN-A | NDRG1_pT | NDUFB4   | NF-kB-p65_ | Notch1   |
|----------|----------|----------|----------|----------|-----------|-------------|----------|------------|----------|----------|----------|----------|------------|----------|
| 1,110739 | 1,04767  | 1,143311 | 0,92796  | 0,943175 | 1,07319   | 1,259658    | 0,90844  | 0,97101    | 1,046718 | 0,811153 | 0,450859 | 1,111708 | 1,088148   | 0,819963 |
| 0,964196 | 0,877233 | 1,220312 | 0,916326 | 0,977379 | 1,051917  | 1,423938    | 0,863568 | 0,998619   | 1,037752 | 0,874816 | 0,444728 | 1,16164  | 1,056013   | 0,809647 |
| 0,960173 | 1,181663 | 0,959081 | 0,99589  | 1,033089 | 1,052429  | 0,986292    | 0,986292 | 1,113882   | 1,026597 | 1,013411 | 1,221704 | 1,004114 | 1,11878    | 1,111945 |
| 0,947585 | 1,237729 | 0,914411 | 0,950432 | 1,021723 | 1,162808  | 0,879378    | 0,974612 | 1,094278   | 1,01097  | 0,949358 | 1,311155 | 0,931246 | 1,136327   | 1,083881 |
| 1,002355 | 1,207447 | 0,926345 | 1,015662 | 0,951308 | 0,928747  | 1,108681    | 0,949385 | 1,055535   | 0,913274 | 0,950624 | 1,143231 | 0,974773 | 0,871418   | 1,284239 |
| 1,329371 | 0,997198 | 0,946785 | 0,80739  | 0,911712 | 2,124396  | 2,462769    | 0,864005 | 1,134655   | 0,998131 | 0,855509 | 2,319897 | 0,955211 | 0,875263   | 0,515025 |
| 1,364377 | 1,102031 | 0,984487 | 0,818084 | 0,915238 | 2,038653  | 2,399087    | 0,772712 | 1,097919   | 1,000481 | 0,884431 | 2,218576 | 1,0007   | 0,966122   | 0,533368 |
| 1,077366 | 1,049691 | 0,985946 | 0,931217 | 0,79211  | 1,380158  | 1,049691    | 0,859924 | 1,049691   | 1,038003 | 1,097087 | 0,710741 | 0,945695 | 0,915963   | 0,958098 |
| 1        | 1,008999 | 1        | 0,942116 | 0,869397 | 1,091155  | 1           | 0,860362 | 1,073071   | 0,965365 | 1        | 0,752319 | 0,940461 | 0,972572   | 0,940667 |
| 1,051641 | 1,352641 | 0,884569 | 0,819757 | 0,702299 | 0,740417  | 0,724602    | 1,126654 | 0,747959   | 0,968858 | 0,84942  | 0,782599 | 1,007305 | 0,863791   | 0,716396 |
| 1,104656 | 1,328653 | 0,871735 | 0,845685 | 0,739029 | 0,690343  | 0,749057    | 1,153767 | 0,798436   | 0,928805 | 0,884915 | 0,796349 | 0,991527 | 0,918225   | 0,699052 |
| 1,024815 | 1,203324 | 0,977406 | 0,857807 | 0,758408 | 0,749908  | 0,703929    | 1,113355 | 0,792461   | 0,931472 | 1,021706 | 1,776848 | 1,063236 | 0,832103   | 0,70633  |
| 1,338719 | 1,046094 | 0,975996 | 1,005462 | 0,953829 | 1,051725  | 0,915916    | 0,992256 | 0,976166   | 1,03622  | 0,998272 | 2,025421 | 1,031877 | 1,114146   | 0,969763 |
| 1,209747 | 0,914    | 0,961456 | 1        | 0,982291 | 1         | 1           | 0,910119 | 0,99119    | 1,069486 | 0,987569 | 1,91767  | 1        | 1,138945   | 1,011614 |
| 1,135564 | 0,872961 | 1,014437 | 1,112106 | 1,098148 | 1,048049  | 1,194263    | 0,939898 | 0,945746   | 0,951561 | 1,029808 | 1,891997 | 1,036377 | 1,200654   | 0,783945 |
| 0,97431  | 0,916501 | 1,083088 | 1,065699 | 1,080881 | 0,93433   | 1,080881    | 0,995881 | 0,938657   | 1,012586 | 0,757738 | 0,929716 | 0,973045 | 0,716876   | 2,672888 |
| 0,986131 | 0,858202 | 1,14104  | 1,08239  | 1,082585 | 0,916485  | 0,992976    | 1,033418 | 0,956343   | 0,992976 | 0,959994 | 0,992976 | 0,99831  | 0,755466   | 2,72818  |
| 1,127816 | 0,993854 | 1,118498 | 1,041854 | 0,959881 | 0,970005  | 0,774656    | 1,043663 | 0,955736   | 0,929298 | 0,911255 | 0,977825 | 1,020037 | 0,774656   | 2,602653 |

| Notch3   | oct-04   | P-Cadherin | P-Met_pY1 | p16INK4a | p21      | p27-Kip-1 | p27_pT198 | p38-MAPK | p38_pT180 | p44-42-MA | p53      | p70-S6K1 | p70-S6K_p | p90RSK_pT |
|----------|----------|------------|-----------|----------|----------|-----------|-----------|----------|-----------|-----------|----------|----------|-----------|-----------|
| 0,863041 | 1,103883 | 1,075566   | 0,084234  | 0,698135 | 0,79412  | 0,917514  | 1,097539  | 0,94479  | 0,819106  | 0,977588  | 0,914048 | 1,067787 | 1,048461  | 0,788604  |
| 1,009729 | 1,09051  | 1,035056   | 0,094166  | 0,711997 | 0,82359  | 0,913999  | 0,941683  | 1,030003 | 0,823262  | 0,999574  | 0,806096 | 1,126393 | 1,145075  | 0,845638  |
| 1,081849 | 0,979321 | 1,01104    | 0,986292  | 1,558868 | 0,897469 | 0,98836   | 0,975158  | 0,933252 | 1,285209  | 0,902727  | 1,067182 | 1,289397 | 1,13788   | 1,129377  |
| 1,06292  | 1,006867 | 1,018846   | 1,114634  | 1,745272 | 0,879378 | 0,967136  | 1,002682  | 0,916942 | 1,231771  | 0,923677  | 1,001642 | 1,316478 | 1,138281  | 1,191809  |
| 1,044908 | 1,023402 | 0,996735   | 1,784451  | 2,024797 | 0,774441 | 0,983165  | 1,175819  | 0,868151 | 1,184975  | 0,877686  | 1,023084 | 1,076615 | 0,704307  | 1,038109  |
| 0,994702 | 1,166548 | 1,168682   | 0,074825  | 1,155974 | 0,914867 | 0,946758  | 0,913729  | 1,184852 | 0,964611  | 1,181568  | 0,991562 | 1,17002  | 1,900563  | 0,540575  |
| 0,947347 | 1,111147 | 1,412444   | 0,073108  | 1,169048 | 0,890207 | 0,882859  | 0,929997  | 1,24017  | 0,971148  | 1,237145  | 0,945685 | 1,176312 | 2,021467  | 0,563025  |
| 1,00557  | 0,932013 | 1,039683   | 0,770386  | 1,78203  | 0,999559 | 1,019551  | 0,949258  | 0,984844 | 0,904842  | 1,297959  | 0,946465 | 1,049691 | 1,00262   | 0,711899  |
| 1,023948 | 1        | 1          | 0,755592  | 1,674917 | 1,113509 | 1         | 0,997304  | 1,001487 | 0,89603   | 1,144891  | 0,857037 | 1,115049 | 0,954797  | 0,698215  |
| 1,025898 | 1,006048 | 1,113545   | 1,282598  | 1,08649  | 0,821372 | 0,945984  | 1,014086  | 1,208296 | 1,055021  | 0,728582  | 1,101162 | 1,024335 | 0,754359  | 0,951753  |
| 1,029546 | 1,045591 | 1,119174   | 1,429457  | 1,05396  | 0,820063 | 0,929048  | 1,036666  | 1,342873 | 1,078659  | 0,720221  | 1,051569 | 1,105879 | 0,808552  | 0,95733   |
| 1,118091 | 0,984603 | 1,121748   | 0,317081  | 1,165569 | 0,851564 | 0,968926  | 1,218161  | 0,933056 | 1,105284  | 0,704125  | 1,150461 | 1,038137 | 0,73706   | 1,150384  |
| 1,059402 | 1,038081 | 0,959042   | 1,493735  | 0,998882 | 0,919929 | 0,979979  | 1,109273  | 1,020949 | 1,120617  | 1,003503  | 1,019117 | 0,994312 | 0,724977  | 1,029505  |
| 1        | 0,968069 | 0,936242   | 1,212844  | 1        | 0,787326 | 1,006803  | 1,120244  | 1        | 1,085248  | 1         | 1,017184 | 0,996949 | 0,737939  | 0,93254   |
| 1,050156 | 1,015303 | 1,083471   | 1,223094  | 0,98531  | 0,69866  | 1,009572  | 1,194263  | 1,092962 | 1,194263  | 1,005653  | 0,725031 | 0,914426 | 0,878778  | 1,214363  |
| 0,891613 | 1,044472 | 0,891577   | 2,04571   | 0,347246 | 1,00753  | 0,824371  | 0,968216  | 0,952038 | 0,904827  | 0,994374  | 0,884883 | 0,880907 | 1,080881  | 1,076377  |
| 0,941664 | 1,019627 | 0,951473   | 1,86761   | 0,373882 | 1,069552 | 0,896777  | 1,034655  | 1,03336  | 0,925596  | 1,062354  | 0,992976 | 0,965911 | 1,132224  | 1,086228  |
| 0,918719 | 1,040605 | 0,928164   | 1,848636  | 0,385501 | 1,025307 | 0,86841   | 1,005849  | 0,946718 | 1,038849  | 1,04144   | 0,938744 | 0,924055 | 0,856342  | 0,914855  |

| PAI-1    | PAICS    | PAK1     | PAK4     | PAR      | PARP     | Paxillin | PCNA     | PD-1     | PD-L1    | Pdcd4    | PDGFR-b  | PDHK1    | PDK1     | PDK1_pS24 |
|----------|----------|----------|----------|----------|----------|----------|----------|----------|----------|----------|----------|----------|----------|-----------|
| 0,898206 | 0,899554 | 0,977166 | 0,905988 | 3,52169  | 1,014518 | 0,745916 | 1,047238 | 0,939747 | 1,084449 | 1,110518 | 2,132013 | 1,038907 | 0,725539 | 0,685787  |
| 0,946851 | 0,968838 | 1,032286 | 0,926292 | 3,168963 | 0,888372 | 0,812777 | 0,938238 | 0,907776 | 1,125584 | 1,023391 | 2,154569 | 1,05005  | 0,758166 | 0,754924  |
| 0,996996 | 0,986292 | 1,49457  | 1,137789 | 1,271324 | 1,111637 | 0,986292 | 0,986292 | 1,010366 | 0,965586 | 0,947221 | 0,292474 | 0,894261 | 1,059967 | 1,02363   |
| 0,95498  | 0,954782 | 1,455662 | 1,14418  | 1,252301 | 1,252256 | 0,997498 | 1,010882 | 0,97341  | 0,960295 | 0,965982 | 0,325128 | 0,879378 | 0,994958 | 1,09082   |
| 0,860225 | 1,132277 | 1,285362 | 0,903726 | 0,634258 | 1,506098 | 1,101156 | 0,939375 | 0,891963 | 0,888868 | 1,077382 | 0,336405 | 0,86028  | 0,938042 | 1,044656  |
| 0,947997 | 1,10535  | 0,653418 | 1,383926 | 0,733318 | 0,756448 | 0,798164 | 0,922082 | 1,346829 | 1,15629  | 0,814151 | 5,552944 | 1,225257 | 0,893287 | 1,196531  |
| 0,883629 | 1,054578 | 0,668512 | 1,469062 | 0,838122 | 0,726995 | 0,789633 | 0,980529 | 1,267889 | 1,166716 | 0,745634 | 5,358982 | 1,313244 | 0,95132  | 1,215594  |
| 0,955129 | 1,021966 | 1,43772  | 0,961848 | 0,938854 | 0,847564 | 0,93454  | 0,974502 | 0,9088   | 1,223371 | 1,688251 | 2,002783 | 1,123006 | 0,946861 | 1,020485  |
| 0,962453 | 0,936545 | 1,61388  | 1        | 0,873599 | 0,628519 | 0,955589 | 0,995165 | 0,958437 | 1,060939 | 1,678876 | 2,135528 | 1,001002 | 1        | 1         |
| 0,900852 | 1,682711 | 0,694692 | 1,069138 | 2,492672 | 1,235254 | 1,018913 | 1,155265 | 0,962998 | 0,99789  | 0,902372 | 0,331679 | 0,871916 | 1,027362 | 1,147451  |
| 0,913508 | 1,613203 | 0,729471 | 1,029141 | 1,63618  | 1,288657 | 1,046976 | 1,11368  | 0,942904 | 0,941878 | 0,749057 | 0,333568 | 0,823667 | 1,063667 | 1,26348   |
| 0,897457 | 1,282533 | 0,65461  | 0,899877 | 5,561362 | 1,264099 | 1,035885 | 0,959608 | 0,97637  | 0,969296 | 0,860719 | 0,344078 | 0,865263 | 0,991715 | 1,146981  |
| 0,997508 | 1,775151 | 1,081841 | 1,02332  | 1,892851 | 1,472783 | 1,083211 | 1,01934  | 0,976054 | 0,955445 | 0,687464 | 0,277468 | 0,916044 | 1,008656 | 1,103926  |
| 1,006409 | 1,694393 | 1,018422 | 1,025801 | 1,572881 | 1,498993 | 1,084063 | 1,042377 | 0,979124 | 0,941523 | 0,741277 | 0,277066 | 0,923225 | 1,07099  | 1,102947  |
| 0,861673 | 1,093352 | 0,934637 | 1,104929 | 2,727331 | 1,194263 | 0,98977  | 0,999101 | 0,992601 | 0,920481 | 0,648838 | 0,305694 | 0,876347 | 0,944978 | 1,061658  |
| 1,011665 | 0,967408 | 0,960372 | 0,832853 | 0,53854  | 0,845681 | 1,029585 | 0,99872  | 1,080881 | 0,958723 | 1,277697 | 0,993901 | 0,989227 | 0,840384 | 0,93099   |
| 0,992976 | 1,007387 | 0,992976 | 0,841185 | 0,574823 | 0,962993 | 1,070555 | 1,000626 | 1,062276 | 0,992976 | 1,412184 | 0,992976 | 1,046585 | 0,943649 | 0,927254  |
| 0,913241 | 1,224047 | 1,023523 | 0,831612 | 0,662971 | 1,088861 | 1,026606 | 0,949289 | 1,050629 | 1,034087 | 1,415768 | 1,046861 | 1,082944 | 0,889433 | 0,842514  |

| PEA-15   | PEA-15_pS | PI3K-p110- | PI3K-p110- | PI3K-p85 | PKA-a    | PKC-b-II_pS | PKC-delta_ | PKCa     | PKM2     | PLC-gamma: | PLK1     | PMS2     | Porin    | PRAS40   |
|----------|-----------|------------|------------|----------|----------|-------------|------------|----------|----------|------------|----------|----------|----------|----------|
| 0,976802 | 1,046995  | 1,054171   | 0,880419   | 1,428987 | 0,902652 | 0,607773    | 1,031526   | 1,324588 | 0,903764 | 0,93152    | 1,259658 | 1,152988 | 1,001692 | 1,142735 |
| 1,093581 | 0,84125   | 1,097873   | 0,922782   | 1,515364 | 0,952908 | 0,546593    | 1,082015   | 1,335694 | 0,905369 | 0,775467   | 1,423938 | 1,153188 | 1,204022 | 1,196842 |
| 1,14046  | 0,918047  | 0,975627   | 0,941413   | 1,007006 | 0,801776 | 0,986292    | 0,970673   | 1,002463 | 0,833253 | 1,081073   | 0,986292 | 1,042513 | 1,007718 | 0,977942 |
| 1,118576 | 0,91692   | 0,966788   | 0,912976   | 0,979056 | 0,861551 | 1,0589      | 0,944551   | 1,04481  | 1,064896 | 1,062875   | 0,879378 | 1,082366 | 1,009418 | 1,025759 |
| 1,110059 | 1,113443  | 0,942971   | 0,785663   | 1,019701 | 0,730758 | 0,860507    | 0,95065    | 0,722393 | 1,114624 | 1,051733   | 0,727944 | 1,122476 | 0,962666 | 0,953268 |
| 1,274792 | 1,077846  | 0,9203     | 0,852661   | 0,615112 | 0,908381 | 0,653587    | 0,930886   | 1,314891 | 1,370196 | 1,03794    | 2,462769 | 1,984845 | 1,03798  | 1,30746  |
| 1,273922 | 0,853542  | 0,891007   | 0,865341   | 0,65354  | 0,896583 | 0,728707    | 1,021641   | 1,32434  | 1,297676 | 1,0294     | 2,399087 | 1,93352  | 1,010901 | 1,157014 |
| 0,987162 | 0,989523  | 1,049691   | 1,106701   | 0,939246 | 1,436631 | 1,034382    | 1,066736   | 1,232597 | 1,038408 | 1,01445    | 1,049691 | 0,950864 | 1,041064 | 1,035254 |
| 0,967184 | 1         | 1,003802   | 1,048916   | 1        | 1,377012 | 1,06541     | 1,029349   | 1,221836 | 1,008262 | 1          | 1        | 1,116078 | 1,023568 | 1,023313 |
| 0,932827 | 0,893957  | 0,973993   | 0,848465   | 0,941515 | 0,981068 | 0,909642    | 0,956721   | 0,639098 | 0,733996 | 1,058238   | 0,83733  | 1,302833 | 0,943646 | 1,062461 |
| 1,002702 | 0,891957  | 0,988706   | 0,882149   | 0,949127 | 1,008176 | 0,929906    | 0,926407   | 0,655327 | 0,817686 | 0,969465   | 0,780588 | 1,199742 | 0,968531 | 0,956968 |
| 0,982227 | 1,193647  | 0,977315   | 0,888005   | 0,902108 | 0,818894 | 0,783816    | 0,914259   | 0,741639 | 0,703929 | 0,928072   | 0,784114 | 1,27348  | 0,983572 | 0,973293 |
| 1,310397 | 0,906001  | 0,953254   | 0,937614   | 0,855493 | 0,915916 | 1,027191    | 0,966757   | 0,915925 | 1,1292   | 0,996704   | 0,915916 | 0,960355 | 0,98049  | 0,968615 |
| 1,395458 | 0,899868  | 0,959016   | 0,958459   | 0,916988 | 0,890778 | 1,064473    | 0,948354   | 0,914129 | 1,15473  | 0,97896    | 1        | 0,990358 | 1        | 1,005535 |
| 1,140258 | 1,464637  | 0,992413   | 0,871614   | 0,964311 | 1,048716 | 0,784235    | 0,938908   | 0,687841 | 0,993798 | 1,049061   | 1,194263 | 0,962505 | 1,116794 | 1,053413 |
| 1,031055 | 0,696158  | 1,02767    | 0,960553   | 1,04227  | 1,773768 | 0,909855    | 0,97001    | 0,822355 | 1,076318 | 1,084376   | 1,080881 | 1,042686 | 0,979486 | 1,024282 |
| 0,992976 | 0,925313  | 1,044659   | 0,992976   | 1,118699 | 1,844069 | 0,984381    | 0,992976   | 0,828453 | 1,053712 | 1,130979   | 0,992976 | 0,992976 | 0,942149 | 0,992976 |
| 0,715045 | 0,842654  | 1,063596   | 0,939521   | 1,164416 | 1,74345  | 0,904724    | 0,981662   | 0,774656 | 0,968784 | 1,09432    | 0,9679   | 1,185635 | 0,875676 | 0,990293 |

| PRAS40_pT | PREX1    | Progesterone | PTEN     | Rab11    | Rab25    | Rad50    | Rad51    | Raptor   | Rb       | RBM15    | Rb_pS807_Rheb | Rictor   | Rictor_pT1 |          |
|-----------|----------|--------------|----------|----------|----------|----------|----------|----------|----------|----------|---------------|----------|------------|----------|
| 0,783757  | 1,073379 | 1,174212     | 1,336228 | 1,020127 | 1,003993 | 1,012127 | 1,121063 | 1,070231 | 1,027466 | 1,231582 | 1,162312      | 0,778012 | 0,912333   | 0,906903 |
| 0,764754  | 1,129822 | 1,188086     | 1,423938 | 0,954738 | 0,940699 | 0,900009 | 1,191678 | 1,128669 | 0,939827 | 1,144504 | 1,158007      | 0,734241 | 0,957358   | 0,967295 |
| 0,60011   | 1,069112 | 0,981959     | 0,965334 | 0,98977  | 0,989371 | 1,162593 | 1,096145 | 1,112089 | 1,001873 | 0,986292 | 1,393446      | 1,07106  | 1,098694   | 0,916777 |
| 1,292289  | 1,140074 | 0,972801     | 0,937297 | 1,00058  | 0,952765 | 1,280059 | 1,111387 | 1,18112  | 1,029062 | 1,029465 | 1,475538      | 1,189663 | 1,093224   | 0,909495 |
| 1,09101   | 1,137543 | 0,948076     | 0,749324 | 0,909056 | 0,832323 | 1,425593 | 1,124988 | 1,067114 | 1,00624  | 3,78744  | 1,003546      | 1,135085 | 1,015395   | 0,899912 |
| 0,774025  | 1,25608  | 1,241883     | 0,930775 | 0,88355  | 1,102194 | 0,538179 | 1,379008 | 0,914127 | 0,953005 | 1,069425 | 0,336628      | 0,827067 | 0,863217   | 1,264299 |
| 0,75428   | 1,354762 | 1,292414     | 0,928534 | 0,953    | 1,174134 | 0,524263 | 1,14427  | 0,850631 | 0,94241  | 1,041461 | 0,348682      | 0,859554 | 0,895435   | 1,296224 |
| 0,945084  | 0,976633 | 1,014381     | 1,317207 | 0,918381 | 1,061478 | 0,593171 | 0,952739 | 0,999043 | 1,023819 | 0,455679 | 0,841791      | 1,002801 | 0,937996   | 0,953124 |
| 0,903163  | 0,958168 | 1            | 1,253493 | 1,062546 | 1,024762 | 0,627811 | 0,916004 | 1        | 1,019329 | 0,696113 | 0,810632      | 0,752078 | 1          | 0,953164 |
| 0,559187  | 1,256472 | 1,055534     | 0,679171 | 1,122393 | 0,804382 | 1,871582 | 1,338084 | 0,952034 | 1,005181 | 1,307094 | 1,622494      | 1,095746 | 0,890037   | 0,875883 |
| 1,130864  | 1,23638  | 1,048138     | 0,714014 | 1,121154 | 0,936372 | 1,808515 | 1,430562 | 0,921165 | 1,010791 | 1,337885 | 1,743532      | 1,140396 | 0,926827   | 0,886213 |
| 1,094882  | 1,188966 | 1,016674     | 0,658882 | 1,01341  | 0,961149 | 1,828486 | 1,293817 | 1,016772 | 1,007513 | 3,939999 | 1,130987      | 1,112371 | 0,921975   | 0,769547 |
| 1,004489  | 1,140382 | 0,964185     | 0,877598 | 0,915916 | 0,915916 | 1,561186 | 1,044909 | 0,979831 | 1,006165 | 1,062864 | 0,848774      | 0,9852   | 1,129026   | 0,952193 |
| 1,058061  | 1        | 0,968968     | 0,948905 | 0,951064 | 0,933334 | 1,516273 | 1        | 0,977127 | 1        | 0,984865 | 0,875929      | 1,019216 | 1,129124   | 0,960566 |
| 1,210965  | 1,07844  | 0,955618     | 1,048221 | 0,784721 | 0,913909 | 1,136368 | 1,030089 | 0,990088 | 1,072304 | 1,358911 | 0,732814      | 0,864039 | 1,123118   | 1,366657 |
| 1,080881  | 0,862464 | 1,176043     | 1,253849 | 0,732141 | 0,94207  | 0,644533 | 1,062883 | 1,011068 | 1,019936 | 1,019114 | 1,495186      | 1,003743 | 0,856162   | 1,080881 |
| 1,024481  | 0,94472  | 1,219129     | 1,288876 | 0,923808 | 0,988196 | 0,621569 | 1,039385 | 1,075762 | 0,98768  | 1,015032 | 1,584516      | 0,992976 | 0,90795    | 1,094828 |
| 1,092973  | 1,058045 | 1,17501      | 1,263834 | 0,891319 | 0,929279 | 0,774656 | 1,03984  | 1,054841 | 0,997396 | 0,954631 | 1,592242      | 0,920337 | 0,850301   | 1,06254  |



| RIP      | RPA32    | RPA32_pS4 | RSK      | S6       | S6_pS235_ | S6_pS240_ | SCD      | SDHA     | SF2      | Shc_pY317 | SHP-2_pY5 | SLC1A5   | Slfn11   | Smac     |
|----------|----------|-----------|----------|----------|-----------|-----------|----------|----------|----------|-----------|-----------|----------|----------|----------|
| 1,181462 | 0,902496 | 0,834532  | 0,465701 | 0,746581 | 1,281591  | 1,259658  | 1,146944 | 1,041615 | 0,941627 | 0,805473  | 1,032299  | 1,042276 | 0,973074 | 0,938562 |
| 0,977379 | 0,848516 | 0,884014  | 0,468922 | 0,816224 | 1,341056  | 1,313391  | 1,228249 | 1,144441 | 0,964809 | 0,637371  | 1,057344  | 0,856969 | 1,016487 | 0,990142 |
| 0,986292 | 1,106276 | 0,988174  | 0,986292 | 1,03895  | 1,717998  | 1,354109  | 0,98964  | 0,904659 | 1,032003 | 0,99054   | 0,9417    | 0,815319 | 0,789243 | 0,985701 |
| 0,856519 | 1,050118 | 0,961886  | 0,95735  | 1,031898 | 1,701257  | 1,363355  | 0,974749 | 0,914631 | 1,014511 | 0,946344  | 0,916077  | 0,966327 | 0,998141 | 1,023628 |
| 0,946453 | 1,011263 | 1,012369  | 0,939953 | 1,305651 | 0,853301  | 1,16766   | 0,925124 | 0,766047 | 1,028592 | 0,864704  | 0,915577  | 0,961345 | 0,924048 | 1,075798 |
| 1,195042 | 0,767256 | 0,700419  | 0,215158 | 0,629747 | 2,27565   | 1,260633  | 1,149747 | 1,001869 | 0,89197  | 0,700647  | 1,289157  | 1,395135 | 0,961575 | 1,073861 |
| 0,660471 | 0,71784  | 0,674217  | 0,209594 | 0,652722 | 2,373635  | 1,327655  | 1,067152 | 0,963634 | 0,89968  | 0,705503  | 1,343456  | 1,282507 | 0,941553 | 1,043602 |
| 1,226192 | 1,064484 | 0,701889  | 0,558934 | 0,978109 | 0,635405  | 0,696846  | 0,887881 | 1,049691 | 0,93067  | 1,048791  | 1,221494  | 1,535829 | 0,810122 | 0,960266 |
| 1,147143 | 0,831412 | 0,681842  | 0,557407 | 0,900187 | 0,639939  | 0,629177  | 0,851971 | 1,015112 | 0,972333 | 0,971891  | 1,264247  | 0,985279 | 0,832196 | 1,01648  |
| 1,204609 | 1,255403 | 0,938543  | 0,802354 | 0,905193 | 0,678607  | 0,709937  | 1,009378 | 0,789176 | 0,981654 | 0,986828  | 1,00644   | 1,348535 | 0,949338 | 1,154516 |
| 1,132935 | 1,209103 | 0,948976  | 0,796276 | 1,000704 | 0,773581  | 0,813484  | 1,013187 | 0,841349 | 0,962714 | 0,934543  | 1,022754  | 1,253565 | 0,969546 | 1,140416 |
| 1,161952 | 1,167104 | 1,146793  | 0,751148 | 1,237398 | 0,428371  | 0,580502  | 0,995239 | 0,836571 | 1,011899 | 0,735213  | 0,7595    | 1,711417 | 0,946611 | 1,189539 |
| 0,783258 | 1,293438 | 1,040753  | 1,008705 | 1,07154  | 0,344742  | 0,417637  | 0,961793 | 0,877276 | 1,02072  | 0,915916  | 0,915916  | 0,892876 | 0,964031 | 0,999671 |
| 0,904736 | 1,165429 | 1,065931  | 1,044497 | 1        | 0,331246  | 0,409092  | 1,008705 | 0,938382 | 1,020975 | 0,939939  | 0,904562  | 1,026959 | 1,047598 | 1        |
| 0,717186 | 0,965577 | 1,194263  | 0,918296 | 1,322706 | 1,165454  | 1,080735  | 1,038724 | 0,86035  | 1,124701 | 0,87002   | 0,872038  | 1,139195 | 0,867117 | 0,891845 |
| 1,03134  | 0,954596 | 0,711159  | 1,376112 | 0,957385 | 1,469344  | 1,447141  | 1,000954 | 1,089926 | 0,9761   | 1,120447  | 0,971196  | 1,517346 | 0,82489  | 1,011563 |
| 1,366179 | 0,992976 | 0,662134  | 1,378299 | 0,959057 | 1,579205  | 1,579105  | 0,992976 | 1,155491 | 0,992976 | 1,100488  | 1,010714  | 1,441858 | 0,992976 | 1,009156 |
| 1,301459 | 1,126663 | 0,815662  | 1,338494 | 0,934666 | 1,080032  | 1,225084  | 1,006028 | 1,255046 | 0,902937 | 0,996162  | 0,917054  | 1,530496 | 0,981443 | 1,169876 |

| Smad1    | Smad3    | Smad4    | Snail    | SOD1     | SOD2     | Sox2     | Src      | Src-(phospho) | Src_pY527 | Stat3    | Stat3_pY70 | Stat5a   | Stathmin-1 | STING    |
|----------|----------|----------|----------|----------|----------|----------|----------|---------------|-----------|----------|------------|----------|------------|----------|
| 1,082396 | 0,963851 | 1,107341 | 0,904425 | 0,838599 | 1,221219 | 1,38889  | 0,601047 | 0,512646      | 0,510417  | 1,259658 | 1,090569   | 1,576881 | 0,863542   | 0,813923 |
| 1,049896 | 1,065299 | 1,183335 | 0,963041 | 0,885144 | 1,271683 | 1,423938 | 0,684988 | 0,523765      | 0,401414  | 1,202713 | 1,12751    | 1,609319 | 0,939941   | 0,846419 |
| 1,037288 | 1,122139 | 0,986292 | 0,950724 | 1,002961 | 0,946824 | 1,095054 | 1,136968 | 1,080051      | 1,175358  | 0,669456 | 0,914568   | 0,885516 | 1,012527   | 0,806323 |
| 1,041788 | 1,217699 | 0,984753 | 0,939587 | 1,10311  | 0,896522 | 1,061933 | 1,00123  | 1,119247      | 1,262509  | 0,714927 | 0,879378   | 0,879378 | 0,947004   | 0,83733  |
| 0,962545 | 1,172112 | 0,893888 | 1,159437 | 1,001231 | 0,863877 | 1,172984 | 1,031802 | 0,975759      | 1,490128  | 1,119321 | 1,040828   | 0,89371  | 0,839185   | 4,009113 |
| 1,06995  | 0,780971 | 1,085551 | 0,950322 | 1,2161   | 1,316446 | 0,932964 | 0,911917 | 0,508993      | 0,760177  | 1,507206 | 1,45068    | 1,051604 | 0,82839    | 1,219278 |
| 1,014657 | 0,956947 | 1,334128 | 0,934397 | 1,054741 | 1,28038  | 0,912672 | 0,993729 | 0,509645      | 0,790757  | 1,478969 | 1,452552   | 1,115838 | 0,793561   | 1,18775  |
| 1,028638 | 1,049691 | 1,052074 | 0,922043 | 1,122959 | 1,036134 | 0,75066  | 0,850825 | 1,103428      | 0,969073  | 1,288514 | 1,070253   | 1,141989 | 1,031499   | 1,060777 |
| 1        | 0,987907 | 0,957665 | 0,927141 | 1        | 0,976759 | 0,78346  | 0,81054  | 1             | 1,011001  | 1,316595 | 1,132736   | 1,12437  | 0,961004   | 1        |
| 0,8977   | 1,107282 | 1,112234 | 0,882002 | 1,034168 | 0,95237  | 1,364227 | 0,777335 | 1,16542       | 0,729647  | 0,716158 | 0,805673   | 0,634698 | 0,916496   | 0,780969 |
| 0,896368 | 1,166307 | 1,097544 | 0,876115 | 1,055071 | 0,912918 | 1,47808  | 0,865483 | 1,209812      | 0,779335  | 0,758824 | 0,78038    | 0,648879 | 0,911128   | 0,659505 |
| 0,959011 | 1,247945 | 1,030162 | 0,900939 | 1,04714  | 1,010153 | 1,763691 | 0,985463 | 0,622069      | 1,185747  | 0,456359 | 0,808032   | 0,770242 | 0,852639   | 1,531909 |
| 1,209829 | 1,231951 | 1,021224 | 0,989996 | 0,916334 | 0,965742 | 0,971682 | 1,40293  | 1,04105       | 1,177925  | 0,546442 | 0,848521   | 0,871091 | 1,021188   | 0,775639 |
| 1,183958 | 1,133744 | 0,999862 | 1        | 0,94548  | 1,002203 | 0,954323 | 1,321462 | 1,069283      | 1,139062  | 0,562763 | 0,850637   | 0,941419 | 1,088611   | 0,668304 |
| 0,98145  | 1,144056 | 0,979113 | 1,032098 | 0,989807 | 1,016056 | 0,858994 | 1,286863 | 0,856594      | 1,110187  | 0,591812 | 0,927176   | 0,929465 | 0,91177    | 3,138413 |
| 0,880075 | 0,837783 | 0,989218 | 1,681781 | 0,989958 | 1,080881 | 0,868808 | 0,935915 | 1,054052      | 0,774316  | 1,350186 | 1,241614   | 1,736671 | 1,006443   | 1,291906 |
| 0,951255 | 0,933189 | 0,999298 | 1,705629 | 0,9059   | 1,04897  | 1,024981 | 0,992976 | 1,073301      | 0,813692  | 1,423168 | 1,239971   | 1,80706  | 0,992976   | 1,468064 |
| 0,94258  | 1,056667 | 0,970758 | 1,858618 | 1,128111 | 1,012296 | 0,936067 | 0,912849 | 0,993566      | 0,774656  | 1,390717 | 1,215533   | 1,847587 | 0,930463   | 1,634673 |

| Syk      | Tau      | TAZ      | TFAM     | TFRC     | TIGAR    | Transglut | TRIM25   | TSC1     | TTF1     | Tuberin  | Tuberin_p1 | TUFM     | TWIST    | Tyro3    |
|----------|----------|----------|----------|----------|----------|-----------|----------|----------|----------|----------|------------|----------|----------|----------|
| 1,074244 | 0,959291 | 0,990624 | 1,20484  | 1,379739 | 0,939645 | 1,033771  | 1,259658 | 0,747865 | 1,169061 | 0,927574 | 1,052066   | 1,010892 | 1,046581 | 0,981486 |
| 1,102293 | 1,023852 | 1,100224 | 1,142537 | 1,421291 | 0,976072 | 1,059209  | 1,423938 | 0,759268 | 1,273517 | 0,977036 | 1,059944   | 0,831692 | 1,095127 | 1,0183   |
| 0,986292 | 0,986292 | 1,224967 | 0,881934 | 0,984458 | 1,075635 | 0,939404  | 0,986292 | 0,893141 | 1,039432 | 1,000745 | 0,986292   | 0,986292 | 1,009453 | 0,986292 |
| 1,056112 | 0,981408 | 1,258005 | 0,962908 | 0,967946 | 1,072875 | 1,057714  | 0,879378 | 0,893214 | 0,97635  | 1,102116 | 0,973655   | 1,1635   | 1,045235 | 1,019718 |
| 1,063328 | 0,964459 | 1,224135 | 1,169587 | 0,97674  | 1,258528 | 0,922339  | 0,634258 | 0,810645 | 0,93856  | 1,20703  | 0,948248   | 1,115084 | 1,013226 | 1,009674 |
| 1,190794 | 1,327599 | 0,973302 | 1,678335 | 2,458191 | 1,038322 | 1,396761  | 2,462769 | 1,610557 | 1,131865 | 1,053345 | 1,302918   | 0,982739 | 1,174665 | 0,925463 |
| 1,177116 | 1,196987 | 1,112522 | 1,634937 | 2,394627 | 1,000822 | 1,239524  | 2,399087 | 1,608897 | 1,125417 | 0,917884 | 1,24131    | 0,969138 | 1,138804 | 0,875287 |
| 0,839293 | 1,032911 | 0,867753 | 1,482198 | 1,158962 | 0,821894 | 1,120102  | 1,049691 | 0,998306 | 1,041181 | 0,880775 | 0,965632   | 0,944583 | 0,98312  | 0,957661 |
| 0,84849  | 1,053653 | 0,893387 | 1,147018 | 1        | 0,891323 | 1,226213  | 1        | 1,071241 | 1,026241 | 0,971407 | 0,983699   | 1,089152 | 0,986286 | 0,971463 |
| 1,05805  | 1,014498 | 1,020113 | 1,323555 | 1,45203  | 0,911122 | 0,821903  | 0,749394 | 0,73616  | 1,071473 | 1,181354 | 0,959244   | 1,117791 | 1,010339 | 1,025931 |
| 0,999853 | 0,976049 | 1,055618 | 1,242711 | 1,490942 | 0,911167 | 0,874578  | 0,749057 | 0,763629 | 1,039137 | 1,073047 | 0,915718   | 1,107489 | 1,000147 | 1,007447 |
| 1,017571 | 1,001246 | 1,116552 | 1,243276 | 1,489813 | 1,234703 | 0,885556  | 0,703929 | 0,729089 | 1,030157 | 1,121181 | 0,918775   | 1,299448 | 1,011748 | 1,019717 |
| 1,021438 | 0,948098 | 1,177182 | 0,877693 | 0,914214 | 1,001338 | 1,05069   | 0,915916 | 1,048317 | 1,019502 | 0,915916 | 0,996666   | 1,182885 | 1,037334 | 1,059461 |
| 1,090665 | 0,960511 | 1,20603  | 0,899211 | 0,998141 | 1        | 1         | 1        | 1,01268  | 0,980498 | 0,964328 | 1,0037     | 1,110885 | 1        | 1,049124 |
| 1,045612 | 0,983868 | 1,174754 | 1,11783  | 1,192043 | 1,02003  | 1,060762  | 1,194263 | 1,027419 | 0,97134  | 0,915512 | 1,161093   | 1,103812 | 1,01903  | 0,930678 |
| 0,992542 | 1,029271 | 0,984202 | 1,080881 | 1,078872 | 0,919597 | 0,908978  | 1,080881 | 0,747589 | 0,972761 | 1,173056 | 1,011499   | 0,896285 | 1,058337 | 1,035127 |
| 1,007876 | 1,05616  | 0,992976 | 1,101499 | 1,218849 | 0,979227 | 0,887558  | 0,992976 | 0,796463 | 0,992976 | 1,342246 | 1,006145   | 0,899027 | 1,054572 | 1,043953 |
| 0,993236 | 1,04099  | 0,886637 | 1,286304 | 1,683917 | 0,958202 | 0,883189  | 0,774656 | 0,781883 | 0,975501 | 1,413788 | 0,978797   | 1,033829 | 1,110529 | 1,059052 |

| U-Histone- | UBAC1    | UGT1A    | ULK1_pS75 | VASP     | VEGFR-2  | VHL-EPPK1 | Vimentin | Wee1     | Wee1_pS6 | WIPI1    | WIPI2    | XBP-1    | XPA      | XPF      |
|------------|----------|----------|-----------|----------|----------|-----------|----------|----------|----------|----------|----------|----------|----------|----------|
| 0,932433   | 0,898303 | 1,060004 | 1,245882  | 0,598098 | 0,879417 | 1,210167  | 1,036088 | 1,259658 | 1,123111 | 1,02301  | 1,139143 | 1,114943 | 1,050436 | 0,998308 |
| 1,037185   | 0,835064 | 1,105376 | 1,284125  | 0,631731 | 0,900164 | 1,182996  | 1,118407 | 1,176998 | 1,127334 | 0,97011  | 0,795944 | 1,215033 | 1,11419  | 1,028056 |
| 1,036492   | 1,050215 | 0,795553 | 0,935606  | 1,190166 | 1,178648 | 1,015777  | 1,014584 | 0,953329 | 1,222099 | 1,217283 | 0,844962 | 0,985623 | 0,932375 | 0,986292 |
| 0,839695   | 1,054645 | 0,76337  | 0,808469  | 1,159558 | 1,247721 | 0,879378  | 0,959078 | 0,944934 | 1,183285 | 1,301786 | 0,933654 | 0,981335 | 1,008925 | 0,939108 |
| 0,984641   | 0,895345 | 1,004169 | 0,977794  | 1,155481 | 1,236111 | 0,855087  | 0,925779 | 0,995263 | 1,046773 | 1,899271 | 1,068879 | 0,968069 | 0,985571 | 0,870396 |
| 0,916765   | 0,911688 | 2,462769 | 1,429545  | 0,79692  | 1,325867 | 1,524105  | 1,215629 | 0,936991 | 0,976631 | 0,933282 | 2,074235 | 1,131528 | 1,196846 | 0,859216 |
| 1,122818   | 0,877129 | 2,468861 | 1,447459  | 0,816582 | 1,351333 | 1,25214   | 1,24864  | 0,849265 | 0,790907 | 1,07879  | 1,308433 | 1,115546 | 1,092217 | 0,877089 |
| 0,081435   | 1,049691 | 1,788952 | 1,33562   | 1,049691 | 1,364159 | 0,822632  | 1,000441 | 1,032001 | 0,927317 | 0,948974 | 0,975437 | 0,92972  | 1,049691 | 0,957794 |
| 0,99782    | 0,968053 | 1,650543 | 1,393383  | 1,054479 | 1,340881 | 0,755416  | 0,960072 | 0,68125  | 0,98528  | 1        | 1,055161 | 0,998378 | 1,208721 | 0,922925 |
| 0,946214   | 1,072158 | 0,639407 | 0,898969  | 0,883596 | 0,866494 | 1,361868  | 0,878781 | 1,326334 | 1,222926 | 1,371579 | 1,23088  | 0,985686 | 1,310597 | 0,935231 |
| 0,935863   | 1,096475 | 0,660479 | 0,878981  | 0,896601 | 0,920926 | 1,194448  | 0,962162 | 1,346947 | 1,163324 | 1,442467 | 1,204506 | 0,986511 | 1,060791 | 0,914426 |
| 1,025952   | 1,015073 | 0,719598 | 1,061122  | 0,807071 | 1,054887 | 1,234776  | 0,941561 | 1,362145 | 1,236206 | 1,155141 | 1,189526 | 0,925046 | 1,059591 | 0,865821 |
| 1,004319   | 0,954146 | 0,737858 | 1,006484  | 1,230342 | 0,878723 | 1,100234  | 0,98415  | 1,025474 | 1,190371 | 0,905985 | 0,817811 | 0,980568 | 0,871255 | 0,924479 |
| 1,046263   | 0,939226 | 0,711903 | 1         | 1,24579  | 0,861742 | 0,820683  | 1        | 0,953305 | 1,13304  | 0,927986 | 0,888417 | 1        | 1,225553 | 0,925501 |
| 1,125591   | 0,845798 | 0,875309 | 0,962292  | 0,773446 | 0,826634 | 0,850939  | 0,99149  | 0,7043   | 1,066693 | 1,114688 | 0,959914 | 1,010789 | 0,914011 | 0,955512 |
| 1,080881   | 1,027974 | 1,210541 | 1,059406  | 0,526837 | 0,79279  | 1,384301  | 1,016531 | 1,25686  | 0,971692 | 1,172463 | 1,080881 | 1,026143 | 0,984104 | 1,019593 |
| 1,052176   | 1,023191 | 1,138754 | 1,149461  | 0,517509 | 0,839287 | 1,315587  | 1,035149 | 1,239583 | 0,992976 | 1,20629  | 1,210376 | 1,057007 | 1,037756 | 0,999736 |
| 0,992426   | 1,013035 | 1,384123 | 1,007291  | 0,617872 | 0,774656 | 1,1213    | 0,999569 | 1,306187 | 0,988184 | 1,31791  | 1,147144 | 1,012588 | 1,100193 | 0,986878 |

| XRCC1    | YAP      | YAP_pS127 | YB1_pS102 | ZAP-70   |
|----------|----------|-----------|-----------|----------|
| 1,071328 | 0,994923 | 0,777948  | 0,841969  | 1,096174 |
| 0,98798  | 0,985166 | 0,822088  | 0,915462  | 1,105441 |
| 0,967433 | 1,003541 | 0,945719  | 1,083507  | 0,986292 |
| 1,027219 | 0,955034 | 0,879378  | 1,094627  | 0,948043 |
| 1,07879  | 0,932544 | 1,2831    | 0,919685  | 0,918945 |
| 0,795401 | 0,925105 | 1,748823  | 0,880809  | 1,238507 |
| 0,855545 | 0,910758 | 1,795218  | 0,87392   | 1,262238 |
| 0,811682 | 1,027301 | 1,485821  | 0,93884   | 1,011524 |
| 0,718895 | 0,992591 | 1,514294  | 0,896192  | 1,091368 |
| 1,164403 | 1,015211 | 0,725     | 0,849462  | 1,198034 |
| 1,035781 | 0,91377  | 0,734288  | 0,911244  | 1,142111 |
| 1,188473 | 1,058353 | 0,785413  | 0,859468  | 1,068986 |
| 1,074997 | 1,018775 | 0,796259  | 1,025891  | 1,040723 |
| 0,948487 | 1        | 0,79319   | 1         | 0,953993 |
| 0,9029   | 0,858556 | 0,75535   | 0,934128  | 0,959888 |
| 1,080881 | 0,96763  | 1,188918  | 1,067591  | 0,97983  |
| 1,219603 | 1,028987 | 1,190246  | 1,088315  | 1,111305 |
| 1,27131  | 1,002983 | 1,135393  | 0,974743  | 1,091465 |

## ANOVA - Subtype A (MGT4, 9, 11) vs. MGT2

| #   | Protein        | p-value     | Ratio (MGT4, 9, 11 vs. 2) | Fold change (MGT4, 9, 11 vs. 2) | F(cell lines) | SS(cell lines) | SS(Error)  | F(Error) |
|-----|----------------|-------------|---------------------------|---------------------------------|---------------|----------------|------------|----------|
| 173 | PDGFR-b        | 1,08E-13    | 0,146377                  | -6,83167                        | 2680,48       | 45,9792        | 0,0314478  | 1        |
| 220 | Stat5a         | 2,64E-10    | 0,519908                  | -1,92342                        | 212,947       | 2,68086        | 0,0230804  | 1        |
| 106 | Heregulin      | 2,92E-06    | 0,531313                  | -1,88213                        | 15,8753       | 1,22152        | 0,141065   | 1        |
| 149 | Notch1         | 0,0748195   | 1,14099                   | 1,14099                         | 261,231       | 8,7418         | 0,0613504  | 1        |
| 218 | Stat3          | 0,000198521 | 0,553762                  | -1,80583                        | 22,5764       | 2,24621        | 0,182405   | 1        |
| 114 | IGFRb          | 0,610093    | 1,03396                   | 1,03396                         | 224,45        | 5,12321        | 0,041847   | 1        |
| 16  | AMPKa_pT172    | 0,00315167  | 0,57961                   | -1,7253                         | 20,1532       | 5,16458        | 0,469821   | 1        |
| 192 | PTEN           | 6,24E-07    | 0,610168                  | -1,63889                        | 36,5922       | 1,00525        | 0,0503651  | 1        |
| 184 | PKCa           | 2,95E-05    | 0,611766                  | -1,63461                        | 18,1378       | 1,02674        | 0,103781   | 1        |
| 99  | Granzyme-B     | 4,49E-06    | 0,627723                  | -1,59306                        | 41,2121       | 1,35911        | 0,0604605  | 1        |
| 180 | PI3K-p85       | 1,16E-08    | 0,644194                  | -1,55233                        | 65,5844       | 0,787884       | 0,0220243  | 1        |
| 227 | TRIM25         | 0,00053431  | 0,646933                  | -1,54576                        | 45,9436       | 4,35433        | 0,173755   | 1        |
| 187 | PLK1           | 0,000101582 | 0,671224                  | -1,48982                        | 74,7899       | 4,09094        | 0,100282   | 1        |
| 20  | Atg7           | 0,60119     | 0,979264                  | -1,02117                        | 90,159        | 1,23961        | 0,0252068  | 1        |
| 129 | MCT4           | 0,867443    | 1,03122                   | 1,03122                         | 84,0128       | 9,79881        | 0,21383    | 1        |
| 19  | Atg3           | 6,48E-05    | 0,674586                  | -1,48239                        | 11,0157       | 0,46522        | 0,0774264  | 1        |
| 206 | S6_pS240_S24   | 0,0212966   | 0,681984                  | -1,46631                        | 8,71822       | 1,99056        | 0,41859    | 1        |
| 143 | Myosin-IIa_pS: | 0,000470945 | 0,684166                  | -1,46163                        | 56,6744       | 4,16063        | 0,13459    | 1        |
| 62  | Cox-IV         | 0,00012595  | 0,701733                  | -1,42504                        | 81,2113       | 3,84541        | 0,0868097  | 1        |
| 181 | PKA-a          | 0,55918     | 0,964983                  | -1,03629                        | 75,668        | 2,16153        | 0,0523711  | 1        |
| 25  | Axl            | 1,52E-06    | 0,71399                   | -1,40058                        | 41,9318       | 0,580668       | 0,0253878  | 1        |
| 128 | Mcl-1          | 0,00361495  | 0,715149                  | -1,39831                        | 11,3896       | 1,13117        | 0,18208    | 1        |
| 126 | LRP6_pS1490    | 0,88489     | 0,994255                  | -1,00578                        | 66,1155       | 0,789773       | 0,0218998  | 1        |
| 101 | Gys            | 4,96E-07    | 0,725166                  | -1,379                          | 324,947       | 2,62375        | 0,014803   | 1        |
| 145 | N-Cadherin     | 0,0559853   | 0,960772                  | -1,04083                        | 64,9493       | 0,208575       | 0,00588748 | 1        |
| 125 | LDHA           | 0,00230132  | 0,735287                  | -1,36001                        | 19,2759       | 1,35548        | 0,12892    | 1        |
| 65  | Cyclin-B1      | 0,00024449  | 0,735434                  | -1,35974                        | 82,2768       | 3,5958         | 0,0801235  | 1        |
| 188 | PMS2           | 0,344717    | 0,957489                  | -1,0444                         | 60,6591       | 1,46813        | 0,0443722  | 1        |
| 123 | LC3A-B         | 0,215517    | 1,08316                   | 1,08316                         | 58,4615       | 1,87329        | 0,0587456  | 1        |
| 142 | Myosin-Heavy   | 0,0813902   | 0,880941                  | -1,13515                        | 58,0716       | 2,47971        | 0,078285   | 1        |
| 236 | ULK1_pS757     | 8,34E-05    | 0,749204                  | -1,33475                        | 23,8444       | 0,644312       | 0,0495395  | 1        |
| 29  | B-Raf          | 8,33E-08    | 0,762985                  | -1,31064                        | 111,25        | 0,617595       | 0,0101776  | 1        |
| 214 | SOD2           | 7,50E-07    | 0,763649                  | -1,3095                         | 35,5291       | 0,303646       | 0,0156684  | 1        |
| 21  | ATM            | 0,000815902 | 0,770212                  | -1,29834                        | 18,4361       | 0,970152       | 0,0964744  | 1        |
| 163 | p70-S6K_pT38:  | 0,0367157   | 0,77218                   | -1,29503                        | 19,7553       | 2,1438         | 0,198949   | 1        |
| 166 | PAK1           | 0,559137    | 1,03392                   | 1,03392                         | 49,2351       | 1,5473         | 0,0576156  | 1        |
| 110 | HSP27_pS82     | 0,0200727   | 0,775754                  | -1,28907                        | 10,1753       | 1,07461        | 0,193617   | 1        |
| 17  | AR             | 0,000157581 | 0,779128                  | -1,28349                        | 7,24728       | 0,173602       | 0,0439159  | 1        |
| 98  | Glutaminase    | 0,000155622 | 0,780194                  | -1,28173                        | 80,6271       | 1,4637         | 0,0332823  | 1        |
| 207 | SDHA           | 0,000392208 | 0,785629                  | -1,27286                        | 12,7619       | 0,273363       | 0,0392706  | 1        |
| 219 | Stat3_pY705    | 3,10E-05    | 0,786986                  | -1,27067                        | 62,5686       | 0,749615       | 0,0219646  | 1        |
| 172 | Pdcd4          | 0,000937141 | 0,789402                  | -1,26678                        | 71,9431       | 1,77986        | 0,0453565  | 1        |
| 59  | COG3           | 0,0971174   | 0,920635                  | -1,08621                        | 38,9353       | 0,588651       | 0,0277176  | 1        |
| 247 | YAP_pS127      | 0,476629    | 1,0691                    | 1,0691                          | 37,918        | 2,09533        | 0,101309   | 1        |
| 30  | B-Raf_pS445    | 0,000232716 | 0,796073                  | -1,25617                        | 10,5878       | 0,221288       | 0,0383174  | 1        |
| 139 | MSI2           | 4,27E-06    | 0,79778                   | -1,25348                        | 18,0605       | 0,144807       | 0,0146995  | 1        |
| 102 | Gys_pS641      | 3,33E-05    | 0,817827                  | -1,22275                        | 189,262       | 1,40427        | 0,0136028  | 1        |
| 60  | Collagen-VI    | 0,0210347   | 0,821627                  | -1,2171                         | 13,1673       | 0,713145       | 0,0992937  | 1        |
| 229 | TTF1           | 7,57E-06    | 0,824851                  | -1,21234                        | 15,007        | 0,108667       | 0,0132754  | 1        |
| 191 | Progesterone-l | 8,65E-08    | 0,83835                   | -1,19282                        | 94,235        | 0,221118       | 0,00430183 | 1        |
| 174 | PDHK1          | 0,000351092 | 0,841501                  | -1,18835                        | 28,3303       | 0,29458        | 0,019063   | 1        |
| 243 | XBP-1          | 1,63E-05    | 0,841555                  | -1,18828                        | 13,4597       | 0,085545       | 0,011652   | 1        |
| 215 | Sox2           | 0,0197289   | 0,846989                  | -1,18065                        | 19,6576       | 1,20302        | 0,112197   | 1        |
| 90  | FoxO3a         | 0,000710501 | 0,850018                  | -1,17645                        | 7,09168       | 0,0949975      | 0,0245586  | 1        |
| 131 | MEK1           | 0,0862033   | 0,888455                  | -1,12555                        | 23,975        | 1,28431        | 0,098209   | 1        |
| 36  | Beclin         | 0,000579213 | 0,851373                  | -1,17457                        | 10,1533       | 0,129077       | 0,0233067  | 1        |
| 225 | TFRC           | 0,0726572   | 0,830355                  | -1,2043                         | 23,0032       | 3,23592        | 0,2579     | 1        |
| 171 | PD-L1          | 0,00109392  | 0,858836                  | -1,16437                        | 10,7281       | 0,133421       | 0,0228005  | 1        |
| 108 | Hexokinase-II  | 0,342714    | 0,967622                  | -1,03346                        | 22,6331       | 0,23349        | 0,0189132  | 1        |
| 81  | ER             | 0,000131643 | 0,861309                  | -1,16102                        | 12,1807       | 0,0968804      | 0,0145816  | 1        |
| 118 | IRS1           | 0,152006    | 1,14885                   | 1,14885                         | 21,6986       | 2,81443        | 0,237794   | 1        |
| 135 | MIF            | 0,0016136   | 0,862612                  | -1,15927                        | 12,857        | 0,162293       | 0,023142   | 1        |
| 140 | mTOR           | 0,218133    | 1,03657                   | 1,03657                         | 21,6487       | 0,141672       | 0,0119976  | 1        |
| 69  | DM-Histone-H:  | 0,00112926  | 0,862785                  | -1,15904                        | 16,9499       | 0,224844       | 0,0243195  | 1        |
| 8   | A-Raf          | 0,0484134   | 0,865165                  | -1,15585                        | 2,42788       | 0,121051       | 0,0914079  | 1        |
| 52  | CD4            | 0,0237995   | 0,866791                  | -1,15368                        | 7,06838       | 0,237332       | 0,0615571  | 1        |

|     |                |             |          |          |         |           |            |   |
|-----|----------------|-------------|----------|----------|---------|-----------|------------|---|
| 50  | CD134          | 0,00160553  | 0,86804  | -1,15202 | 6,86224 | 0,0886066 | 0,0236724  | 1 |
| 88  | Fibronectin    | 0,612654    | 0,870297 | -1,14903 | 20,1859 | 16,8349   | 1,52898    | 1 |
| 115 | INPP4b         | 0,000924067 | 0,876443 | -1,14098 | 7,69294 | 0,0688118 | 0,0163988  | 1 |
| 209 | SHP-2_pY542    | 0,0370133   | 0,877828 | -1,13918 | 13,4274 | 0,381753  | 0,0521231  | 1 |
| 160 | p44-42-MAPK    | 0,00353761  | 0,884115 | -1,13108 | 48,2315 | 0,455429  | 0,0173114  | 1 |
| 71  | DUSP4          | 0,00934556  | 0,885848 | -1,12886 | 17,8602 | 0,340866  | 0,0349897  | 1 |
| 31  | B7-H4          | 0,000169984 | 0,887563 | -1,12668 | 55,7304 | 0,254248  | 0,00836387 | 1 |
| 3   | 14-3-3-beta    | 0,000312794 | 0,888024 | -1,1261  | 7,01879 | 0,0383397 | 0,0100145  | 1 |
| 183 | PKC-delta_pS6  | 0,000290416 | 0,895524 | -1,11666 | 7,28739 | 0,0321434 | 0,00808651 | 1 |
| 45  | C-Raf          | 0,00690107  | 0,900781 | -1,11015 | 12,349  | 0,127875  | 0,0189843  | 1 |
| 179 | PI3K-p110-a    | 3,95E-05    | 0,901476 | -1,10929 | 17,5983 | 0,0447948 | 0,00466657 | 1 |
| 39  | BRD4           | 0,0244602   | 0,904827 | -1,10518 | 15,2571 | 0,215063  | 0,0258425  | 1 |
| 244 | XPF            | 0,00502473  | 0,912061 | -1,09642 | 5,6978  | 0,036381  | 0,011706   | 1 |
| 78  | eIF4E_pS209    | 0,0133372   | 0,916362 | -1,09127 | 5,70269 | 0,0556886 | 0,0179031  | 1 |
| 151 | 04-oct         | 0,00265902  | 0,918227 | -1,08906 | 8,60402 | 0,0456702 | 0,00973133 | 1 |
| 40  | c-Abl          | 0,0120691   | 0,926762 | -1,07903 | 5,76258 | 0,0348276 | 0,0110802  | 1 |
| 197 | Raptor         | 0,029677    | 0,929489 | -1,07586 | 10,2826 | 0,0973311 | 0,0173536  | 1 |
| 22  | ATM_pS1981     | 0,00410807  | 0,929732 | -1,07558 | 26,8204 | 0,106612  | 0,00728759 | 1 |
| 156 | p27-Kip-1      | 0,00932017  | 1,06517  | 1,06517  | 12,5046 | 0,0442074 | 0,00648135 | 1 |
| 91  | FoxO3a-(p_S3)  | 0,011967    | 1,06793  | 1,06793  | 5,07456 | 0,0205944 | 0,00744033 | 1 |
| 97  | Glutamate-D1-  | 0,028718    | 1,09586  | 1,09586  | 15,1267 | 0,181095  | 0,0219485  | 1 |
| 200 | Rictor         | 0,00154301  | 1,10861  | 1,10861  | 27,7896 | 0,161173  | 0,0106329  | 1 |
| 61  | Connexin-43    | 0,15408     | 1,1711   | 1,1711   | 15,6721 | 3,01638   | 0,352858   | 1 |
| 112 | IGF1R_pY1135   | 0,019286    | 1,10887  | 1,10887  | 21,4428 | 0,272795  | 0,0233237  | 1 |
| 223 | TAZ            | 0,0145134   | 1,11144  | 1,11144  | 14,9438 | 0,237227  | 0,0291034  | 1 |
| 132 | MEK1_pS217_    | 0,00307844  | 1,11846  | 1,11846  | 6,74308 | 0,0568754 | 0,0154635  | 1 |
| 150 | Notch3         | 0,0063406   | 1,12403  | 1,12403  | 4,82015 | 0,0564768 | 0,0214808  | 1 |
| 238 | VEGFR-2        | 0,00990612  | 1,13284  | 1,13284  | 57,4204 | 0,813718  | 0,0259806  | 1 |
| 76  | EGFR_pY1173    | 0,000443573 | 1,13345  | 1,13345  | 9,80828 | 0,056272  | 0,0105182  | 1 |
| 24  | Aurora-B       | 0,0207669   | 1,13493  | 1,13493  | 3,69143 | 0,0699945 | 0,0347624  | 1 |
| 235 | UBAC1          | 0,0139717   | 1,14396  | 1,14396  | 4,508   | 0,0808853 | 0,0328948  | 1 |
| 146 | NAPSIN-A       | 0,0403182   | 1,14475  | 1,14475  | 2,99184 | 0,0810062 | 0,0496389  | 1 |
| 199 | Rb_pS807_S81   | 0,766182    | 1,03693  | 1,03693  | 14,168  | 2,7481    | 0,355602   | 1 |
| 231 | Tuberin_pT146  | 0,0661435   | 0,93259  | -1,07228 | 14,1568 | 0,169301  | 0,0219248  | 1 |
| 196 | Rad51          | 0,888414    | 1,00602  | 1,00602  | 13,7869 | 0,317955  | 0,0422807  | 1 |
| 167 | PAK4           | 0,0631488   | 1,13252  | 1,13252  | 13,7548 | 0,466078  | 0,0621221  | 1 |
| 11  | Akt            | 0,13488     | 1,07993  | 1,07993  | 13,6563 | 0,261477  | 0,0351029  | 1 |
| 127 | MAPK_pT202_    | 0,0255476   | 1,14687  | 1,14687  | 18,2811 | 0,389619  | 0,0390732  | 1 |
| 144 | Myt1           | 0,00031202  | 1,14701  | 1,14701  | 27,5113 | 0,17194   | 0,0114579  | 1 |
| 100 | GSK-3a-b_pS2:  | 0,00328648  | 1,14954  | 1,14954  | 49,6985 | 0,584682  | 0,0215684  | 1 |
| 105 | HER3_pY1289    | 0,00153558  | 1,15315  | 1,15315  | 12,0771 | 0,118349  | 0,0179656  | 1 |
| 213 | Smad3          | 0,0259735   | 1,15464  | 1,15464  | 6,38273 | 0,233252  | 0,0669977  | 1 |
| 141 | mTOR_pS2448    | 0,302264    | 0,953442 | -1,04883 | 12,5741 | 0,210657  | 0,0307143  | 1 |
| 80  | Elk1_pS383     | 0,000999443 | 1,16458  | 1,16458  | 8,30934 | 0,0843929 | 0,01862    | 1 |
| 228 | TSC1           | 0,000222615 | 1,16694  | 1,16694  | 227,87  | 1,22223   | 0,00983348 | 1 |
| 32  | Bad_pS112      | 0,0334893   | 1,17703  | 1,17703  | 3,55901 | 0,115742  | 0,0596216  | 1 |
| 15  | AMPKa          | 0,0357664   | 1,17858  | 1,17858  | 5,72029 | 0,200858  | 0,0643744  | 1 |
| 79  | eIF4G          | 0,00179545  | 1,18217  | 1,18217  | 6,89226 | 0,109649  | 0,0291666  | 1 |
| 161 | p53            | 0,0389507   | 1,1829   | 1,1829   | 2,40202 | 0,106289  | 0,0811244  | 1 |
| 37  | Bid            | 0,0141726   | 1,18932  | 1,18932  | 10,6969 | 0,434923  | 0,074541   | 1 |
| 138 | MSH6           | 0,00825374  | 1,19423  | 1,19423  | 10,5037 | 0,348983  | 0,0609123  | 1 |
| 186 | PLC-gamma2_l   | 0,00103584  | 1,19459  | 1,19459  | 6,24204 | 0,0866953 | 0,025463   | 1 |
| 185 | PKM2           | 0,504394    | 1,04975  | 1,04975  | 10,8879 | 0,454477  | 0,0765257  | 1 |
| 26  | b-Actin        | 0,0401365   | 1,19808  | 1,19808  | 7,4584  | 0,493307  | 0,121259   | 1 |
| 203 | RPA32_pS4_S8   | 0,0100323   | 1,20227  | 1,20227  | 14,4553 | 0,444965  | 0,0564341  | 1 |
| 68  | DJ1            | 0,00103     | 1,20467  | 1,20467  | 11,0921 | 0,209944  | 0,0347     | 1 |
| 111 | HSP70          | 0,000450799 | 1,20842  | 1,20842  | 26,2536 | 0,374713  | 0,0261668  | 1 |
| 43  | c-Kit          | 0,00152899  | 1,21456  | 1,21456  | 9,67881 | 0,248033  | 0,0469817  | 1 |
| 190 | PREX1          | 0,457057    | 1,03358  | 1,03358  | 10,3415 | 0,233884  | 0,041463   | 1 |
| 51  | CD20           | 0,191735    | 0,947099 | -1,05586 | 10,3099 | 0,151296  | 0,0269041  | 1 |
| 82  | ER-a_pS118     | 0,000421124 | 1,22119  | 1,22119  | 14,7376 | 0,266244  | 0,0331203  | 1 |
| 232 | TUFM           | 0,0100379   | 1,22861  | 1,22861  | 3,36369 | 0,152081  | 0,0828898  | 1 |
| 27  | b-Catenin      | 0,00685493  | 1,23092  | 1,23092  | 19,371  | 1,03206   | 0,0976768  | 1 |
| 208 | Shc_pY317      | 0,0126903   | 1,26048  | 1,26048  | 6,59602 | 0,258832  | 0,0719412  | 1 |
| 44  | c-Myc          | 0,00316716  | 1,28552  | 1,28552  | 18,0174 | 1,00698   | 0,102464   | 1 |
| 49  | Caveolin-1     | 0,0971409   | 1,33265  | 1,33265  | 10,0118 | 1,9585    | 0,358633   | 1 |
| 35  | Bcl-xL         | 0,0149623   | 1,29682  | 1,29682  | 4,17741 | 0,376623  | 0,165288   | 1 |
| 148 | NF-kB-p65_pS38 | 0,399194    | 0,952911 | -1,04942 | 9,70749 | 0,315754  | 0,0596325  | 1 |
| 164 | p90RSK_pT573   | 0,00639564  | 1,30474  | 1,30474  | 11,5145 | 0,621942  | 0,0990253  | 1 |
| 119 | Jagged1        | 0,000739508 | 1,30593  | 1,30593  | 20,9169 | 0,677713  | 0,0594006  | 1 |

|                    |             |          |          |         |           |            |   |
|--------------------|-------------|----------|----------|---------|-----------|------------|---|
| 245 XRCC1          | 0,825676    | 1,01312  | 1,01312  | 9,47025 | 0,333549  | 0,0645713  | 1 |
| 239 Wee1           | 0,104662    | 0,876613 | -1,14075 | 9,40644 | 0,667283  | 0,130055   | 1 |
| 249 ZAP-70         | 0,0820368   | 0,930328 | -1,07489 | 9,2011  | 0,145113  | 0,0289141  | 1 |
| 109 Histone-H3     | 0,0187727   | 1,32418  | 1,32418  | 5,92002 | 0,561613  | 0,173922   | 1 |
| 85 FAK             | 0,000694245 | 1,32953  | 1,32953  | 5,73598 | 0,170349  | 0,054447   | 1 |
| 170 Paxillin       | 5,24E-06    | 1,33213  | 1,33213  | 19,796  | 0,194305  | 0,0179948  | 1 |
| 205 S6_pS235_S23   | 0,122847    | 0,677394 | -1,47625 | 8,58233 | 5,39909   | 1,15334    | 1 |
| 137 Mnk1           | 0,397508    | 1,04691  | 1,04691  | 8,53919 | 0,256266  | 0,0550193  | 1 |
| 4 14-3-3-zeta      | 1,19E-06    | 1,34827  | 1,34827  | 33,826  | 0,267897  | 0,0145197  | 1 |
| 240 Wee1_pS642     | 0,477296    | 1,03335  | 1,03335  | 8,22266 | 0,209994  | 0,0468206  | 1 |
| 224 TFAM           | 0,352684    | 0,920053 | -1,08689 | 8,10877 | 0,744333  | 0,168288   | 1 |
| 230 Tuberin        | 0,142468    | 1,10623  | 1,10623  | 8,06143 | 0,324571  | 0,0738141  | 1 |
| 53 cdc25C          | 0,258835    | 0,913464 | -1,09473 | 7,90478 | 0,588719  | 0,13654    | 1 |
| 152 P-Cadherin     | 0,767333    | 0,985474 | -1,01474 | 7,73996 | 0,194149  | 0,0459873  | 1 |
| 74 eEF2K           | 0,441313    | 1,09181  | 1,09181  | 7,71876 | 1,10977   | 0,263588   | 1 |
| 47 Caspase-3       | 0,000118548 | 1,35782  | 1,35782  | 10,1404 | 0,28436   | 0,0514109  | 1 |
| 175 PDK1           | 2,39E-05    | 1,363    | 1,363    | 9,15835 | 0,134561  | 0,0269365  | 1 |
| 48 Caspase-7-clea  | 0,0880836   | 1,1119   | 1,1119   | 7,46312 | 0,198301  | 0,048713   | 1 |
| 77 eIF4E           | 8,20E-09    | 1,37103  | 1,37103  | 105,413 | 0,35314   | 0,0061418  | 1 |
| 169 PARP           | 0,00558074  | 1,38083  | 1,38083  | 9,62553 | 1,05198   | 0,200366   | 1 |
| 96 GCN5L2          | 0,000667096 | 1,39302  | 1,39302  | 22,6414 | 1,42422   | 0,115323   | 1 |
| 155 p21            | 0,707418    | 1,02342  | 1,02342  | 7,13402 | 0,169398  | 0,0435327  | 1 |
| 159 p38_pT180_Y1   | 1,73E-06    | 1,3992   | 1,3992   | 24,6677 | 0,308891  | 0,0229572  | 1 |
| 87 FASN            | 0,00198794  | 1,42008  | 1,42008  | 14,6017 | 0,886435  | 0,111297   | 1 |
| 162 p70-S6K1       | 0,809641    | 0,988121 | -1,01202 | 7,05292 | 0,193159  | 0,0502098  | 1 |
| 46 C-Raf_pS338     | 0,000330295 | 1,4264   | 1,4264   | 17,2098 | 0,742969  | 0,0791471  | 1 |
| 103 HER2_pY1248    | 0,0149297   | 1,44063  | 1,44063  | 2,57293 | 0,36422   | 0,259524   | 1 |
| 10 ACC_pS79        | 0,233658    | 1,26526  | 1,26526  | 6,88379 | 2,70112   | 0,719379   | 1 |
| 94 GATA6           | 0,265404    | 0,941572 | -1,06205 | 6,86886 | 0,135719  | 0,036224   | 1 |
| 9 ACC1             | 0,00184344  | 1,44582  | 1,44582  | 15,9361 | 1,4716    | 0,169296   | 1 |
| 86 FAK_pY397       | 0,835995    | 1,03868  | 1,03868  | 6,81998 | 3,40543   | 0,915442   | 1 |
| 165 PAICS          | 0,0196074   | 1,45279  | 1,45279  | 4,40808 | 1,03963   | 0,432387   | 1 |
| 6 4E-BP1_pS65      | 0,000634097 | 1,45378  | 1,45378  | 17,6814 | 1,46513   | 0,151915   | 1 |
| 42 c-Jun_pS73      | 8,11E-08    | 1,50932  | 1,50932  | 116,358 | 1,45267   | 0,0228882  | 1 |
| 41 c-IAP2          | 0,600646    | 1,01761  | 1,01761  | 6,4537  | 0,0613278 | 0,0174217  | 1 |
| 176 PDK1_pS241     | 1,68E-07    | 1,54022  | 1,54022  | 35,1936 | 0,390214  | 0,0203273  | 1 |
| 12 Akt_pS473       | 0,00436292  | 1,55379  | 1,55379  | 18,3478 | 1,69049   | 0,168916   | 1 |
| 177 PEA-15         | 0,256578    | 1,08761  | 1,08761  | 6,15327 | 0,346978  | 0,10338    | 1 |
| 57 Chk2_pT68       | 0,0629573   | 1,10963  | 1,10963  | 5,93181 | 0,140716  | 0,0434908  | 1 |
| 195 Rad50          | 0,000125957 | 1,57946  | 1,57946  | 40,8683 | 3,70815   | 0,166346   | 1 |
| 120 Jak2           | 0,135485    | 0,940837 | -1,06288 | 5,87721 | 0,0853043 | 0,0266098  | 1 |
| 182 PKC-b-II_pS66  | 0,000345515 | 1,618    | 1,618    | 7,55104 | 0,363053  | 0,0881463  | 1 |
| 63 Cox2            | 0,571433    | 1,18839  | 1,18839  | 5,80238 | 23,967    | 7,57267    | 1 |
| 104 HER3           | 0,000111356 | 1,63288  | 1,63288  | 21,6693 | 2,19332   | 0,185566   | 1 |
| 116 IR-b           | 0,000218778 | 1,64733  | 1,64733  | 14,4859 | 0,963358  | 0,121922   | 1 |
| 237 VASP           | 0,000844433 | 1,68805  | 1,68805  | 10,586  | 0,902805  | 0,156352   | 1 |
| 93 Gab2            | 0,00149893  | 1,69641  | 1,69641  | 20,7642 | 2,40937   | 0,21273    | 1 |
| 13 Akt_pT308       | 0,000132405 | 1,81449  | 1,81449  | 19,8553 | 1,27872   | 0,11807    | 1 |
| 121 JNK2           | 0,537938    | 0,977972 | -1,02252 | 5,46307 | 0,0676374 | 0,0226982  | 1 |
| 136 MMP2           | 0,378155    | 0,981625 | -1,01872 | 5,4171  | 0,0235161 | 0,00795865 | 1 |
| 83 ERCC5           | 0,127808    | 1,16538  | 1,16538  | 5,40905 | 0,348821  | 0,118229   | 1 |
| 134 Merlin         | 0,166822    | 1,16384  | 1,16384  | 5,0951  | 0,56156   | 0,202062   | 1 |
| 210 SLC1A5         | 0,231834    | 1,18357  | 1,18357  | 5,08099 | 0,946591  | 0,341551   | 1 |
| 154 p16INK4a       | 2,05E-05    | 1,83106  | 1,83106  | 61,1803 | 4,11802   | 0,123401   | 1 |
| 70 DM-K9-Histone   | 0,217551    | 1,05094  | 1,05094  | 5,04787 | 0,0706856 | 0,0256723  | 1 |
| 54 Cdc2_pY15       | 0,283329    | 0,927179 | -1,07854 | 5,02374 | 0,279873  | 0,102135   | 1 |
| 194 Rab25          | 0,224555    | 0,941539 | -1,06209 | 4,99539 | 0,0956965 | 0,0351211  | 1 |
| 73 eEF2            | 0,443447    | 0,938933 | -1,06504 | 4,95311 | 0,381503  | 0,141209   | 1 |
| 55 CDK1            | 6,94E-08    | 1,88604  | 1,88604  | 184,164 | 4,38771   | 0,0436792  | 1 |
| 67 D-a-Tubulin     | 0,0756837   | 0,930459 | -1,07474 | 4,74738 | 0,0633336 | 0,024458   | 1 |
| 201 Rictor_pT1135  | 0,892292    | 1,01225  | 1,01225  | 4,62353 | 0,3117    | 0,123596   | 1 |
| 242 WIPI2          | 0,754261    | 1,04946  | 1,04946  | 4,54417 | 0,991671  | 0,400087   | 1 |
| 248 YB1_pS102      | 0,0852765   | 1,09731  | 1,09731  | 4,53269 | 0,0910193 | 0,0368145  | 1 |
| 5 4E-BP1           | 3,26E-08    | 1,94132  | 1,94132  | 83,065  | 1,3759    | 0,0303675  | 1 |
| 84 Ets-1           | 0,134148    | 0,96709  | -1,03403 | 4,43743 | 0,020748  | 0,00857209 | 1 |
| 204 RSK            | 2,84E-09    | 1,95084  | 1,95084  | 326,695 | 2,16415   | 0,0121447  | 1 |
| 124 Lck            | 0,0587615   | 1,1629   | 1,1629   | 4,23264 | 0,228688  | 0,0990542  | 1 |
| 216 Src-(phospho-) | 0,00166818  | 1,9596   | 1,9596   | 5,81883 | 0,827672  | 0,260774   | 1 |
| 233 Tyro3          | 0,66492     | 1,01211  | 1,01211  | 4,15696 | 0,0302252 | 0,0133301  | 1 |
| 212 Smad1          | 0,355836    | 0,955667 | -1,04639 | 4,05    | 0,0956214 | 0,0432855  | 1 |



|                   |             |          |          |          |           |           |   |
|-------------------|-------------|----------|----------|----------|-----------|-----------|---|
| 168 PAR           | 0,119847    | 0,632429 | -1,5812  | 3,96584  | 20,7026   | 9,57041   | 1 |
| 217 Src_pY527     | 4,72E-05    | 2,44926  | 2,44926  | 11,0253  | 1,13465   | 0,188674  | 1 |
| 64 Creb           | 0,172066    | 0,963746 | -1,03762 | 3,71864  | 0,0251136 | 0,0123813 | 1 |
| 130 MDM2_pS166    | 0,61547     | 1,02953  | 1,02953  | 3,7033   | 0,0906338 | 0,0448687 | 1 |
| 38 Bim            | 0,00855248  | 2,45677  | 2,45677  | 6,77479  | 5,19634   | 1,40619   | 1 |
| 7 53BP1           | 0,0210697   | 2,75068  | 2,75068  | 3,72702  | 8,23053   | 4,04863   | 1 |
| 18 ARID1A         | 0,0605014   | 1,97199  | 1,97199  | 3,43223  | 6,68877   | 3,57282   | 1 |
| 95 GCLM           | 0,499991    | 0,981277 | -1,01908 | 3,36925  | 0,0253068 | 0,0137703 | 1 |
| 107 HES1          | 2,11E-05    | 2,90854  | 2,90854  | 43,8796  | 7,33319   | 0,306388  | 1 |
| 241 WIPI1         | 0,0946799   | 1,26392  | 1,26392  | 3,21009  | 0,652047  | 0,372394  | 1 |
| 158 p38-MAPK      | 0,543201    | 1,04838  | 1,04838  | 3,14191  | 0,178812  | 0,104338  | 1 |
| 75 EGFR           | 0,0847649   | 1,16266  | 1,16266  | 3,12587  | 0,163053  | 0,0956314 | 1 |
| 202 RIP           | 0,36507     | 0,894917 | -1,11742 | 3,09244  | 0,437652  | 0,25946   | 1 |
| 193 Rab11         | 0,886034    | 0,991129 | -1,00895 | 3,07432  | 0,107638  | 0,0641887 | 1 |
| 34 Bax            | 0,159603    | 1,41421  | 1,41421  | 3,06105  | 1,45184   | 0,869541  | 1 |
| 147 NDRG1_pT346   | 0,000376259 | 3,19268  | 3,19268  | 15,1644  | 5,64423   | 0,682373  | 1 |
| 221 Stathmin-1    | 0,400626    | 1,04742  | 1,04742  | 2,83115  | 0,0664936 | 0,0430585 | 1 |
| 23 ATR_pS428      | 0,0685999   | 1,1284   | 1,1284   | 2,5898   | 0,0881786 | 0,0624221 | 1 |
| 58 Claudin-7      | 8,26E-05    | 3,71646  | 3,71646  | 20,2027  | 31,189    | 2,83031   | 1 |
| 113 IGFBP2        | 0,111664    | 0,856469 | -1,16758 | 2,56926  | 0,224706  | 0,160342  | 1 |
| 72 E-Cadherin     | 1,34E-06    | 6,81231  | 6,81231  | 50,6271  | 154,73    | 5,60315   | 1 |
| 153 P-Met_pY1234  | 0,00111418  | 13,5079  | 13,5079  | 10,2702  | 6,56734   | 1,17234   | 1 |
| 56 Chk1_pS296     | 0,494521    | 0,970922 | -1,02995 | 2,38404  | 0,0404177 | 0,0310814 | 1 |
| 66 Cyclin-D1      | 0,0920015   | 1,09624  | 1,09624  | 2,24121  | 0,0517592 | 0,0423395 | 1 |
| 92 G6PD           | 0,149912    | 0,866254 | -1,1544  | 2,1683   | 0,167204  | 0,141374  | 1 |
| 157 p27_pT198     | 0,253347    | 1,073    | 1,073    | 2,1435   | 0,0802349 | 0,0686247 | 1 |
| 14 AMPK-a2_pS34   | 0,256513    | 1,08803  | 1,08803  | 2,12234  | 0,0877857 | 0,0758317 | 1 |
| 89 FoxM1          | 0,113757    | 0,89613  | -1,11591 | 2,09024  | 0,0810734 | 0,0711088 | 1 |
| 226 TIGAR         | 0,220047    | 1,10031  | 1,10031  | 2,02815  | 0,108713  | 0,0982706 | 1 |
| 122 JNK_pT183_Y1  | 0,297994    | 1,07002  | 1,07002  | 2,02018  | 0,0760564 | 0,0690219 | 1 |
| 117 IRF-1         | 0,0981009   | 0,934488 | -1,0701  | 1,94612  | 0,0303863 | 0,0286253 | 1 |
| 33 Bak            | 0,0710451   | 1,13801  | 1,13801  | 1,87467  | 0,0702506 | 0,0687017 | 1 |
| 234 U-Histone-H2B | 0,95682     | 1,00922  | 1,00922  | 1,55594  | 0,410705  | 0,483925  | 1 |
| 28 b-Catenin_pT4  | 0,152139    | 1,10792  | 1,10792  | 1,32746  | 0,0577034 | 0,0796934 | 1 |
| 211 Sfn11         | 0,351537    | 0,944448 | -1,05882 | 1,24644  | 0,0394885 | 0,0580819 | 1 |
| 133 MERIT40_pS29  | 0,330414    | 0,912678 | -1,09568 | 1,0799   | 0,0862763 | 0,14647   | 1 |
| 198 RBM15         | 0,4592      | 1,4772   | 1,4772   | 0,951534 | 5,1036    | 9,83319   | 1 |
| 189 PRAS40_pT246  | 0,188228    | 1,29757  | 1,29757  | 0,904605 | 0,239531  | 0,48545   | 1 |
| 246 YAP           | 0,689856    | 0,982647 | -1,01766 | 0,788196 | 0,0136047 | 0,0316444 | 1 |
| 178 PEA-15_pS116  | 0,597375    | 1,08254  | 1,08254  | 0,56699  | 0,114289  | 0,369549  | 1 |
| 222 STING         | 0,435835    | 1,76771  | 1,76771  | 0,35209  | 2,14706   | 11,1798   | 1 |

## ANOVA - Subtype B (MGT13) vs. MGT2

| #   | Protein        | p-value     | Ratio (MGT13 vs. 2) | Fold change (MGT13 vs. 2) | F(cell lines) | SS(cell lines) | SS(Error)  | F(Error) |
|-----|----------------|-------------|---------------------|---------------------------|---------------|----------------|------------|----------|
| 168 | PAR            | 0,00796666  | 0,176996            | -5,64983                  | 3,96584       | 20,7026        | 9,57041    | 1        |
| 173 | PDGFR-b        | 1,09E-10    | 0,471819            | -2,11946                  | 2680,48       | 45,9792        | 0,0314478  | 1        |
| 106 | Heregulin      | 5,94E-06    | 0,491576            | -2,03427                  | 15,8753       | 1,22152        | 0,141065   | 1        |
| 154 | p16INK4a       | 0,0051752   | 0,52318             | -1,91139                  | 61,1803       | 4,11802        | 0,123401   | 1        |
| 228 | TSC1           | 0,442482    | 1,02886             | 1,02886                   | 227,87        | 1,22223        | 0,00983348 | 1        |
| 184 | PKCa           | 0,000105671 | 0,607821            | -1,64522                  | 18,1378       | 1,02674        | 0,103781   | 1        |
| 215 | Sox2           | 0,000387963 | 0,670703            | -1,49097                  | 19,6576       | 1,20302        | 0,112197   | 1        |
| 102 | Gys_pS641      | 0,649504    | 1,01481             | 1,01481                   | 189,262       | 1,40427        | 0,0136028  | 1        |
| 118 | IRS1           | 0,014978    | 0,674798            | -1,48193                  | 21,6986       | 2,81443        | 0,237794   | 1        |
| 42  | c-Jun_pS73     | 0,197381    | 0,934333            | -1,07028                  | 116,358       | 1,45267        | 0,0228882  | 1        |
| 61  | Connexin-43    | 0,0342814   | 0,684716            | -1,46046                  | 15,6721       | 3,01638        | 0,352858   | 1        |
| 148 | NF-kB-p65_pS   | 0,00054733  | 0,698641            | -1,43135                  | 9,70749       | 0,315754       | 0,0596325  | 1        |
| 191 | Progesterone-f | 0,631253    | 1,00755             | 1,00755                   | 94,235        | 0,221118       | 0,00430183 | 1        |
| 20  | Atg7           | 0,681356    | 0,981025            | -1,01934                  | 90,159        | 1,23961        | 0,0252068  | 1        |
| 143 | Myosin-IIa_pS1 | 0,00254135  | 0,707636            | -1,41316                  | 56,6744       | 4,16063        | 0,13459    | 1        |
| 227 | TRIM25         | 0,00573092  | 0,707636            | -1,41316                  | 45,9436       | 4,35433        | 0,173755   | 1        |
| 134 | Merlin         | 0,0469397   | 0,710885            | -1,4067                   | 5,0951        | 0,56156        | 0,202062   | 1        |
| 195 | Rad50          | 0,0318499   | 0,711511            | -1,40546                  | 40,8683       | 3,70815        | 0,166346   | 1        |
| 110 | HSP27_pS82     | 0,0152316   | 0,72326             | -1,38263                  | 10,1753       | 1,07461        | 0,193617   | 1        |
| 71  | DUSP4          | 4,66E-05    | 0,725994            | -1,37742                  | 17,8602       | 0,340866       | 0,0349897  | 1        |
| 44  | c-Myc          | 0,016986    | 0,750724            | -1,33205                  | 18,0174       | 1,00698        | 0,102464   | 1        |
| 180 | PI3K-p85       | 2,33E-06    | 0,752941            | -1,32813                  | 65,5844       | 0,787884       | 0,0220243  | 1        |
| 187 | PLK1           | 0,0031451   | 0,755642            | -1,32338                  | 74,7899       | 4,09094        | 0,100282   | 1        |
| 29  | B-Raf          | 3,82E-07    | 0,761564            | -1,31309                  | 111,25        | 0,617595       | 0,0101776  | 1        |
| 145 | N-Cadherin     | 0,129919    | 0,964898            | -1,03638                  | 64,9493       | 0,208575       | 0,00588748 | 1        |
| 62  | Cox-IV         | 0,00307026  | 0,771809            | -1,29566                  | 81,2113       | 3,84541        | 0,0868097  | 1        |
| 73  | eEF2           | 0,027315    | 0,771852            | -1,29559                  | 4,95311       | 0,381503       | 0,141209   | 1        |
| 188 | PMS2           | 0,19857     | 0,931209            | -1,07387                  | 60,6591       | 1,46813        | 0,0443722  | 1        |
| 123 | LC3A-B         | 0,439528    | 1,05926             | 1,05926                   | 58,4615       | 1,87329        | 0,0587456  | 1        |
| 142 | Myosin-Heavy-  | 0,140632    | 0,884918            | -1,13005                  | 58,0716       | 2,47971        | 0,078285   | 1        |
| 238 | VEGFR-2        | 0,0741087   | 0,90161             | -1,10913                  | 57,4204       | 0,813718       | 0,0259806  | 1        |
| 229 | TTF1           | 1,07E-05    | 0,802768            | -1,24569                  | 15,007        | 0,108667       | 0,0132754  | 1        |
| 31  | B7-H4          | 0,279971    | 0,97317             | -1,02757                  | 55,7304       | 0,254248       | 0,00836387 | 1        |
| 72  | E-Cadherin     | 0,39156     | 0,357502            | -2,79719                  | 50,6271       | 154,73         | 5,60315    | 1        |
| 21  | ATM            | 0,00722314  | 0,806507            | -1,23991                  | 18,4361       | 0,970152       | 0,0964744  | 1        |
| 166 | PAK1           | 0,854121    | 0,987623            | -1,01253                  | 49,2351       | 1,5473         | 0,0576156  | 1        |
| 160 | p44-42-MAPK    | 0,248371    | 1,04465             | 1,04465                   | 48,2315       | 0,455429       | 0,0173114  | 1        |
| 65  | Cyclin-B1      | 0,00673208  | 0,806749            | -1,23954                  | 82,2768       | 3,5958         | 0,0801235  | 1        |
| 8   | A-Raf          | 0,0246201   | 0,815429            | -1,22635                  | 2,42788       | 0,121051       | 0,0914079  | 1        |
| 111 | HSP70          | 0,00345903  | 0,816935            | -1,22409                  | 26,2536       | 0,374713       | 0,0261668  | 1        |
| 99  | Granzyme-B     | 0,104485    | 0,907549            | -1,10187                  | 41,2121       | 1,35911        | 0,0604605  | 1        |
| 30  | B-Raf_pS445    | 0,00207868  | 0,821963            | -1,2166                   | 10,5878       | 0,221288       | 0,0383174  | 1        |
| 81  | ER             | 8,49E-05    | 0,829505            | -1,20554                  | 12,1807       | 0,0968804      | 0,0145816  | 1        |
| 214 | SOD2           | 0,000123197 | 0,840291            | -1,19006                  | 35,5291       | 0,303646       | 0,0156684  | 1        |
| 192 | PTEN           | 0,099198    | 0,919403            | -1,08766                  | 36,5922       | 1,00525        | 0,0503651  | 1        |
| 162 | p70-S6K1       | 0,0168898   | 0,841885            | -1,18781                  | 7,05292       | 0,193159       | 0,0502098  | 1        |
| 236 | ULK1_pS757     | 0,00924834  | 0,84747             | -1,17998                  | 23,8444       | 0,644312       | 0,0495395  | 1        |
| 78  | eIF4E_pS209    | 0,000794488 | 0,848195            | -1,17897                  | 5,70269       | 0,0556886      | 0,0179031  | 1        |
| 174 | PDHK1          | 0,899871    | 0,995315            | -1,00471                  | 28,3303       | 0,29458        | 0,019063   | 1        |
| 135 | MIF            | 0,00274436  | 0,851569            | -1,1743                   | 12,857        | 0,162293       | 0,023142   | 1        |
| 17  | AR             | 0,0135122   | 0,864991            | -1,15608                  | 7,24728       | 0,173602       | 0,0439159  | 1        |
| 22  | ATM_pS1981     | 0,19837     | 0,968875            | -1,03213                  | 26,8204       | 0,106612       | 0,00728759 | 1        |
| 36  | Beclin         | 0,00353933  | 0,865642            | -1,15521                  | 10,1533       | 0,129077       | 0,0233067  | 1        |
| 190 | PREX1          | 0,0240693   | 0,86699             | -1,15342                  | 10,3415       | 0,233884       | 0,041463   | 1        |
| 131 | MEK1           | 0,491393    | 1,04921             | 1,04921                   | 23,975        | 1,28431        | 0,098209   | 1        |
| 212 | Smad1          | 0,0310573   | 0,86727             | -1,15304                  | 4,05          | 0,0956214      | 0,0432855  | 1        |
| 225 | TFRC           | 0,610392    | 0,947661            | -1,05523                  | 23,0032       | 3,23592        | 0,2579     | 1        |
| 96  | GCN5L2         | 0,446808    | 0,922699            | -1,08378                  | 22,6414       | 1,42422        | 0,115323   | 1        |
| 108 | Hexokinase-II  | 0,101829    | 1,06806             | 1,06806                   | 22,6331       | 0,23349        | 0,0189132  | 1        |
| 218 | Stat3          | 0,209103    | 1,12739             | 1,12739                   | 22,5764       | 2,24621        | 0,182405   | 1        |
| 240 | Wee1_pS642     | 0,0373854   | 0,874746            | -1,14319                  | 8,22266       | 0,209994       | 0,0468206  | 1        |

|     |               |             |          |          |         |           |            |   |
|-----|---------------|-------------|----------|----------|---------|-----------|------------|---|
| 104 | HER3          | 0,653377    | 0,941659 | -1,06196 | 21,6693 | 2,19332   | 0,185566   | 1 |
| 152 | P-Cadherin    | 0,0475988   | 0,875323 | -1,14244 | 7,73996 | 0,194149  | 0,0459873  | 1 |
| 25  | Axl           | 0,00590256  | 0,877791 | -1,13922 | 41,9318 | 0,580668  | 0,0253878  | 1 |
| 119 | Jagged1       | 0,482063    | 0,943746 | -1,05961 | 20,9169 | 0,677713  | 0,0594006  | 1 |
| 93  | Gab2          | 0,106578    | 0,659258 | -1,51686 | 20,7642 | 2,40937   | 0,21273    | 1 |
| 58  | Claudin-7     | 0,807363    | 0,869129 | -1,15058 | 20,2027 | 31,189    | 2,83031    | 1 |
| 90  | FoxO3a        | 0,00805024  | 0,878312 | -1,13855 | 7,09168 | 0,0949975 | 0,0245586  | 1 |
| 115 | INPP4b        | 0,0038102   | 0,882522 | -1,13312 | 7,69294 | 0,0688118 | 0,0163988  | 1 |
| 243 | XBP-1         | 0,000932885 | 0,885771 | -1,12896 | 13,4597 | 0,085545  | 0,011652   | 1 |
| 117 | IRF-1         | 0,0214383   | 0,886596 | -1,12791 | 1,94612 | 0,0303863 | 0,0286253  | 1 |
| 163 | p70-S6K_pT38  | 0,560881    | 0,932876 | -1,07195 | 19,7553 | 2,1438    | 0,198949   | 1 |
| 3   | 14-3-3-beta   | 0,00101994  | 0,887888 | -1,12627 | 7,01879 | 0,0383397 | 0,0100145  | 1 |
| 27  | b-Catenin     | 0,586225    | 0,95443  | -1,04775 | 19,371  | 1,03206   | 0,0976768  | 1 |
| 125 | LDHA          | 0,757713    | 0,975203 | -1,02543 | 19,2759 | 1,35548   | 0,12892    | 1 |
| 98  | Glutaminase   | 0,0350438   | 0,890247 | -1,12328 | 80,6271 | 1,4637    | 0,0332823  | 1 |
| 171 | PD-L1         | 0,0229596   | 0,900676 | -1,11028 | 10,7281 | 0,133421  | 0,0228005  | 1 |
| 45  | C-Raf         | 0,0168169   | 0,90159  | -1,10915 | 12,349  | 0,127875  | 0,0189843  | 1 |
| 136 | MMP2          | 0,00377979  | 0,91457  | -1,09341 | 5,4171  | 0,0235161 | 0,00795865 | 1 |
| 139 | MSI2          | 0,0677338   | 0,942797 | -1,06067 | 18,0605 | 0,144807  | 0,0146995  | 1 |
| 84  | Ets-1         | 0,00674098  | 0,920921 | -1,08587 | 4,43743 | 0,020748  | 0,00857209 | 1 |
| 183 | PKC-delta_pS6 | 0,0112644   | 0,92882  | -1,07664 | 7,28739 | 0,0321434 | 0,00808651 | 1 |
| 6   | 4E-BP1_pS65   | 0,869373    | 0,981083 | -1,01928 | 17,6814 | 1,46513   | 0,151915   | 1 |
| 179 | PI3K-p110-a   | 0,130633    | 0,971456 | -1,02938 | 17,5983 | 0,0447948 | 0,00466657 | 1 |
| 46  | C-Raf_pS338   | 0,821624    | 0,977571 | -1,02294 | 17,2098 | 0,742969  | 0,0791471  | 1 |
| 69  | DM-Histone-H: | 0,183532    | 0,947886 | -1,05498 | 16,9499 | 0,224844  | 0,0243195  | 1 |
| 200 | Rictor        | 0,0472823   | 0,932208 | -1,07272 | 27,7896 | 0,161173  | 0,0106329  | 1 |
| 156 | p27-Kip-1     | 0,0369904   | 0,942593 | -1,0609  | 12,5046 | 0,0442074 | 0,00648135 | 1 |
| 151 | 04-oct        | 0,0424524   | 0,943223 | -1,06019 | 8,60402 | 0,0456702 | 0,00973133 | 1 |
| 39  | BRD4          | 0,135088    | 0,931202 | -1,07388 | 15,2571 | 0,215063  | 0,0258425  | 1 |
| 76  | EGFR_pY1173   | 0,00543045  | 1,10886  | 1,10886  | 9,80828 | 0,056272  | 0,0105182  | 1 |
| 97  | Glutamate-D1- | 0,391946    | 0,960342 | -1,0413  | 15,1267 | 0,181095  | 0,0219485  | 1 |
| 219 | Stat3_pY705   | 0,0115838   | 1,11121  | 1,11121  | 62,5686 | 0,749615  | 0,0219646  | 1 |
| 223 | TAZ           | 0,079226    | 0,913127 | -1,09514 | 14,9438 | 0,237227  | 0,0291034  | 1 |
| 82  | ER-a_pS118    | 0,735367    | 1,01801  | 1,01801  | 14,7376 | 0,266244  | 0,0331203  | 1 |
| 91  | FoxO3a-(p_S31 | 0,00145173  | 1,11121  | 1,11121  | 5,07456 | 0,0205944 | 0,00744033 | 1 |
| 80  | Elk1_pS383    | 0,0144634   | 1,12557  | 1,12557  | 8,30934 | 0,0843929 | 0,01862    | 1 |
| 203 | RPA32_pS4_S8  | 0,0729682   | 0,84915  | -1,17765 | 14,4553 | 0,444965  | 0,0564341  | 1 |
| 220 | Stat5a        | 0,000487859 | 1,12806  | 1,12806  | 212,947 | 2,68086   | 0,0230804  | 1 |
| 231 | Tuberin_pT146 | 0,188121    | 0,945842 | -1,05726 | 14,1568 | 0,169301  | 0,0219248  | 1 |
| 196 | Rad51         | 0,0803365   | 0,905739 | -1,10407 | 13,7869 | 0,317955  | 0,0422807  | 1 |
| 167 | PAK4          | 0,263038    | 0,911669 | -1,09689 | 13,7548 | 0,466078  | 0,0621221  | 1 |
| 11  | Akt           | 0,130426    | 1,09454  | 1,09454  | 13,6563 | 0,261477  | 0,0351029  | 1 |
| 101 | Gys           | 0,000984417 | 1,13713  | 1,13713  | 324,947 | 2,62375   | 0,014803   | 1 |
| 209 | SHP-2_pY542   | 0,237513    | 0,924868 | -1,08124 | 13,4274 | 0,381753  | 0,0521231  | 1 |
| 60  | Collagen-VI   | 0,660698    | 1,03493  | 1,03493  | 13,1673 | 0,713145  | 0,0992937  | 1 |
| 105 | HER3_pY1289   | 0,00653797  | 1,14309  | 1,14309  | 12,0771 | 0,118349  | 0,0179656  | 1 |
| 207 | SDHA          | 0,203236    | 1,06751  | 1,06751  | 12,7619 | 0,273363  | 0,0392706  | 1 |
| 141 | mTOR_pS2448   | 0,121926    | 1,08418  | 1,08418  | 12,5741 | 0,210657  | 0,0307143  | 1 |
| 57  | Chk2_pT68     | 0,0324054   | 1,15147  | 1,15147  | 5,93181 | 0,140716  | 0,0434908  | 1 |
| 140 | mTOR          | 0,000668745 | 1,15309  | 1,15309  | 21,6487 | 0,141672  | 0,0119976  | 1 |
| 144 | Myt1          | 0,00065574  | 1,15611  | 1,15611  | 27,5113 | 0,17194   | 0,0114579  | 1 |
| 245 | XRCC1         | 0,0419477   | 1,15631  | 1,15631  | 9,47025 | 0,333549  | 0,0645713  | 1 |
| 159 | p38_pT180_Y1  | 0,00783357  | 1,16469  | 1,16469  | 24,6677 | 0,308891  | 0,0229572  | 1 |
| 128 | Mcl-1         | 0,193048    | 1,12527  | 1,12527  | 11,3896 | 1,13117   | 0,18208    | 1 |
| 68  | DJ1           | 0,717612    | 1,02007  | 1,02007  | 11,0921 | 0,209944  | 0,0347     | 1 |
| 235 | UBAC1         | 0,0101172   | 1,17852  | 1,17852  | 4,508   | 0,0808853 | 0,0328948  | 1 |
| 19  | Atg3          | 0,0578352   | 0,87075  | -1,14843 | 11,0157 | 0,46522   | 0,0774264  | 1 |
| 185 | PKM2          | 0,119922    | 1,14191  | 1,14191  | 10,8879 | 0,454477  | 0,0765257  | 1 |
| 248 | YB1_pS102     | 0,00972866  | 1,18759  | 1,18759  | 4,53269 | 0,0910193 | 0,0368145  | 1 |
| 37  | Bid           | 0,0663586   | 1,15478  | 1,15478  | 10,6969 | 0,434923  | 0,074541   | 1 |
| 94  | GATA6         | 0,00764717  | 1,18935  | 1,18935  | 6,86886 | 0,135719  | 0,036224   | 1 |
| 237 | VASP          | 0,587338    | 0,901056 | -1,10981 | 10,586  | 0,902805  | 0,156352   | 1 |
| 138 | MSH6          | 0,571692    | 0,958856 | -1,04291 | 10,5037 | 0,348983  | 0,0609123  | 1 |
| 47  | Caspase-3     | 0,0232792   | 1,18955  | 1,18955  | 10,1404 | 0,28436   | 0,0514109  | 1 |
| 51  | CD20          | 0,0869841   | 1,08345  | 1,08345  | 10,3099 | 0,151296  | 0,0269041  | 1 |

|                    |             |          |          |         |           |           |   |
|--------------------|-------------|----------|----------|---------|-----------|-----------|---|
| 197 Raptor         | 0,177609    | 0,952498 | -1,04987 | 10,2826 | 0,0973311 | 0,0173536 | 1 |
| 77 eIF4E           | 2,96E-05    | 1,19032  | 1,19032  | 105,413 | 0,35314   | 0,0061418 | 1 |
| 175 PDK1           | 0,00701433  | 1,20126  | 1,20126  | 9,15835 | 0,134561  | 0,0269365 | 1 |
| 48 Caspase-7-clea  | 0,0100828   | 1,21651  | 1,21651  | 7,46312 | 0,198301  | 0,048713  | 1 |
| 85 FAK             | 0,0181695   | 1,22891  | 1,22891  | 5,73598 | 0,170349  | 0,054447  | 1 |
| 176 PDK1_pS241     | 0,000784845 | 1,24973  | 1,24973  | 35,1936 | 0,390214  | 0,0203273 | 1 |
| 164 p90RSK_pT573   | 0,0346426   | 1,25541  | 1,25541  | 11,5145 | 0,621942  | 0,0990253 | 1 |
| 4 14-3-3-zeta      | 6,25E-05    | 1,2667   | 1,2667   | 33,826  | 0,267897  | 0,0145197 | 1 |
| 43 c-Kit           | 0,813488    | 1,01448  | 1,01448  | 9,67881 | 0,248033  | 0,0469817 | 1 |
| 169 PARP           | 0,909064    | 1,01513  | 1,01513  | 9,62553 | 1,05198   | 0,200366  | 1 |
| 59 COG3            | 0,000234566 | 1,27332  | 1,27332  | 38,9353 | 0,588651  | 0,0277176 | 1 |
| 239 Wee1           | 0,629776    | 1,0404   | 1,0404   | 9,40644 | 0,667283  | 0,130055  | 1 |
| 249 ZAP-70         | 0,411638    | 0,963717 | -1,03765 | 9,2011  | 0,145113  | 0,0289141 | 1 |
| 155 p21            | 0,00238152  | 1,27851  | 1,27851  | 7,13402 | 0,169398  | 0,0435327 | 1 |
| 206 S6_pS240_S24   | 0,478707    | 1,1015   | 1,1015   | 8,71822 | 1,99056   | 0,41859   | 1 |
| 172 Pcd4           | 0,000320693 | 1,28267  | 1,28267  | 71,9431 | 1,77986   | 0,0453565 | 1 |
| 205 S6_pS235_S23   | 0,830312    | 1,04947  | 1,04947  | 8,58233 | 5,39909   | 1,15334   | 1 |
| 137 Mnk1           | 0,903037    | 0,992242 | -1,00782 | 8,53919 | 0,256266  | 0,0550193 | 1 |
| 15 AMPKa           | 0,00648871  | 1,29203  | 1,29203  | 5,72029 | 0,200858  | 0,0643744 | 1 |
| 186 PLC-gamma2_1   | 0,000141087 | 1,2926   | 1,2926   | 6,24204 | 0,0866953 | 0,025463  | 1 |
| 224 TFAM           | 0,879908    | 0,985123 | -1,0151  | 8,10877 | 0,744333  | 0,168288  | 1 |
| 100 GSK-3a-b_pS21  | 6,08E-05    | 1,2931   | 1,2931   | 49,6985 | 0,584682  | 0,0215684 | 1 |
| 53 cdc25C          | 0,71148     | 0,967785 | -1,03329 | 7,90478 | 0,588719  | 0,13654   | 1 |
| 32 Bad_pS112       | 0,0042153   | 1,3059   | 1,3059   | 3,55901 | 0,115742  | 0,0596216 | 1 |
| 74 eEF2K           | 0,391829    | 0,880374 | -1,13588 | 7,71876 | 1,10977   | 0,263588  | 1 |
| 5 4E-BP1           | 0,00193054  | 1,32775  | 1,32775  | 83,065  | 1,3759    | 0,0303675 | 1 |
| 170 Paxillin       | 1,94E-05    | 1,33734  | 1,33734  | 19,796  | 0,194305  | 0,0179948 | 1 |
| 199 Rb_pS807_S81   | 0,0340238   | 1,34233  | 1,34233  | 14,168  | 2,7481    | 0,355602  | 1 |
| 26 b-Actin         | 0,0609298   | 0,792451 | -1,26191 | 7,4584  | 0,493307  | 0,121259  | 1 |
| 127 MAPK_pT202_0   | 0,000246362 | 1,35323  | 1,35323  | 18,2811 | 0,389619  | 0,0390732 | 1 |
| 87 FASN            | 0,0118659   | 1,36655  | 1,36655  | 14,6017 | 0,886435  | 0,111297  | 1 |
| 230 Tuberin        | 0,000572089 | 1,37529  | 1,37529  | 8,06143 | 0,324571  | 0,0738141 | 1 |
| 112 IGF1R_pY1135   | 2,61E-06    | 1,40848  | 1,40848  | 21,4428 | 0,272795  | 0,0233237 | 1 |
| 52 CD4             | 0,196579    | 0,918402 | -1,08885 | 7,06838 | 0,237332  | 0,0615571 | 1 |
| 9 ACC1             | 0,00846659  | 1,40896  | 1,40896  | 15,9361 | 1,4716    | 0,169296  | 1 |
| 83 ERCC5           | 0,00381892  | 1,42802  | 1,42802  | 5,40905 | 0,348821  | 0,118229  | 1 |
| 79 eIF4G           | 0,993821    | 1,00041  | 1,00041  | 6,89226 | 0,109649  | 0,0291666 | 1 |
| 247 YAP_pS127      | 0,00138756  | 1,46437  | 1,46437  | 37,918  | 2,09533   | 0,101309  | 1 |
| 208 Shc_pY317      | 0,000596084 | 1,48646  | 1,48646  | 6,59602 | 0,258832  | 0,0719412 | 1 |
| 50 CD134           | 0,220672    | 0,95183  | -1,05061 | 6,86224 | 0,0886066 | 0,0236724 | 1 |
| 86 FAK_pY397       | 0,170627    | 0,687624 | -1,45428 | 6,81998 | 3,40543   | 0,915442  | 1 |
| 38 Bim             | 0,172047    | 1,77812  | 1,77812  | 6,77479 | 5,19634   | 1,40619   | 1 |
| 132 MEK1_pS217_!   | 0,495467    | 1,02584  | 1,02584  | 6,74308 | 0,0568754 | 0,0154635 | 1 |
| 103 HER2_pY1248    | 0,0194902   | 1,48794  | 1,48794  | 2,57293 | 0,36422   | 0,259524  | 1 |
| 41 c-IAP2          | 0,496687    | 1,02682  | 1,02682  | 6,4537  | 0,0613278 | 0,0174217 | 1 |
| 213 Smad3          | 0,333724    | 0,929006 | -1,07642 | 6,38273 | 0,233252  | 0,0669977 | 1 |
| 49 Caveolin-1      | 0,027565    | 1,54377  | 1,54377  | 10,0118 | 1,9585    | 0,358633  | 1 |
| 177 PEA-15         | 0,194855    | 0,881987 | -1,1338  | 6,15327 | 0,346978  | 0,10338   | 1 |
| 210 SLC1A5         | 0,00592718  | 1,57596  | 1,57596  | 5,08099 | 0,946591  | 0,341551  | 1 |
| 109 Histone-H3     | 0,276939    | 1,15727  | 1,15727  | 5,92002 | 0,561613  | 0,173922  | 1 |
| 120 Jak2           | 0,118718    | 0,927432 | -1,07825 | 5,87721 | 0,0853043 | 0,0266098 | 1 |
| 16 AMPKa_pT172     | 0,000884095 | 1,58896  | 1,58896  | 20,1532 | 5,16458   | 0,469821  | 1 |
| 63 Cox2            | 0,0603857   | 0,210873 | -4,7422  | 5,80238 | 23,967    | 7,57267   | 1 |
| 40 c-Abl           | 0,34578     | 1,02808  | 1,02808  | 5,76258 | 0,0348276 | 0,0110802 | 1 |
| 10 ACC_pS79        | 0,0296819   | 1,61365  | 1,61365  | 6,88379 | 2,70112   | 0,719379  | 1 |
| 182 PKC-b-II_pS66C | 0,00114756  | 1,61645  | 1,61645  | 7,55104 | 0,363053  | 0,0881463 | 1 |
| 126 LRP6_pS1490    | 2,60E-08    | 1,62767  | 1,62767  | 66,1155 | 0,789773  | 0,0218998 | 1 |
| 244 XPF            | 0,716109    | 0,989032 | -1,01109 | 5,6978  | 0,036381  | 0,011706  | 1 |
| 121 JNK2           | 0,306082    | 0,956571 | -1,0454  | 5,46307 | 0,0676374 | 0,0226982 | 1 |
| 55 CDK1            | 3,87E-06    | 1,69297  | 1,69297  | 184,164 | 4,38771   | 0,0436792 | 1 |
| 217 Src_pY527      | 0,018099    | 1,72741  | 1,72741  | 11,0253 | 1,13465   | 0,188674  | 1 |
| 116 IR-b           | 8,31E-05    | 1,8479   | 1,8479   | 14,4859 | 0,963358  | 0,121922  | 1 |
| 181 PKA-a          | 3,08E-08    | 1,92621  | 1,92621  | 75,668  | 2,16153   | 0,0523711 | 1 |
| 216 Src-(phospho-Y | 0,00341385  | 2,00752  | 2,00752  | 5,81883 | 0,827672  | 0,260774  | 1 |
| 70 DM-K9-Histone   | 0,896171    | 0,993927 | -1,00611 | 5,04787 | 0,0706856 | 0,0256723 | 1 |

|                   |           |          |          |          |           |           |   |
|-------------------|-----------|----------|----------|----------|-----------|-----------|---|
| 54 Cdc2_pY15      | 0,29313   | 0,916766 | -1,09079 | 5,02374  | 0,279873  | 0,102135  | 1 |
| 194 Rab25         | 0,717302  | 0,980291 | -1,02011 | 4,99539  | 0,0956965 | 0,0351211 | 1 |
| 147 NDRG1_pT346   | 0,0433171 | 2,15912  | 2,15912  | 15,1644  | 5,64423   | 0,682373  | 1 |
| 150 Notch3        | 0,645938  | 0,979653 | -1,02077 | 4,82015  | 0,0564768 | 0,0214808 | 1 |
| 67 D-a-Tubulin    | 0,0706427 | 0,917123 | -1,09037 | 4,74738  | 0,0633336 | 0,024458  | 1 |
| 201 Rictor_pT1135 | 0,169374  | 1,15187  | 1,15187  | 4,62353  | 0,3117    | 0,123596  | 1 |
| 242 WIPI2         | 0,32701   | 1,18458  | 1,18458  | 4,54417  | 0,991671  | 0,400087  | 1 |
| 12 Akt_pS473      | 2,65E-05  | 2,2451   | 2,2451   | 18,3478  | 1,69049   | 0,168916  | 1 |
| 13 Akt_pT308      | 8,16E-06  | 2,29725  | 2,29725  | 19,8553  | 1,27872   | 0,11807   | 1 |
| 204 RSK           | 7,79E-12  | 2,91947  | 2,91947  | 326,695  | 2,16415   | 0,0121447 | 1 |
| 165 PAICS         | 0,480766  | 1,14139  | 1,14139  | 4,40808  | 1,03963   | 0,432387  | 1 |
| 124 Lck           | 0,494363  | 1,06378  | 1,06378  | 4,23264  | 0,228688  | 0,0990542 | 1 |
| 35 Bcl-xL         | 0,982799  | 0,997346 | -1,00266 | 4,17741  | 0,376623  | 0,165288  | 1 |
| 233 Tyro3         | 0,17434   | 1,04616  | 1,04616  | 4,15696  | 0,0302252 | 0,0133301 | 1 |
| 129 MCT4          | 1,68E-06  | 2,96479  | 2,96479  | 84,0128  | 9,79881   | 0,21383   | 1 |
| 114 IGFRb         | 3,07E-11  | 2,96917  | 2,96917  | 224,45   | 5,12321   | 0,041847  | 1 |
| 7 53BP1           | 0,919947  | 0,921818 | -1,08481 | 3,72702  | 8,23053   | 4,04863   | 1 |
| 64 Creb           | 0,0806068 | 0,944237 | -1,05906 | 3,71864  | 0,0251136 | 0,0123813 | 1 |
| 130 MDM2_pS166    | 0,989642  | 1,00089  | 1,00089  | 3,7033   | 0,0906338 | 0,0448687 | 1 |
| 24 Aurora-B       | 0,15978   | 1,08809  | 1,08809  | 3,69143  | 0,0699945 | 0,0347624 | 1 |
| 88 Fibronectin    | 2,12E-05  | 3,05017  | 3,05017  | 20,1859  | 16,8349   | 1,52898   | 1 |
| 18 ARID1A         | 0,648131  | 0,745381 | -1,3416  | 3,43223  | 6,68877   | 3,57282   | 1 |
| 95 GCLM           | 0,100177  | 0,943737 | -1,05962 | 3,36925  | 0,0253068 | 0,0137703 | 1 |
| 232 TUFM          | 0,788764  | 1,02361  | 1,02361  | 3,36369  | 0,152081  | 0,0828898 | 1 |
| 241 WIPI1         | 0,188192  | 1,23647  | 1,23647  | 3,21009  | 0,652047  | 0,372394  | 1 |
| 158 p38-MAPK      | 0,912259  | 0,989848 | -1,01026 | 3,14191  | 0,178812  | 0,104338  | 1 |
| 75 EGFR           | 0,262043  | 0,881459 | -1,13448 | 3,12587  | 0,163053  | 0,0956314 | 1 |
| 202 RIP           | 0,296755  | 1,14227  | 1,14227  | 3,09244  | 0,437652  | 0,25946   | 1 |
| 193 Rab11         | 0,0727852 | 0,859896 | -1,16293 | 3,07432  | 0,107638  | 0,0641887 | 1 |
| 34 Bax            | 0,495722  | 1,22592  | 1,22592  | 3,06105  | 1,45184   | 0,869541  | 1 |
| 146 NAPSIN-A      | 0,597461  | 1,03956  | 1,03956  | 2,99184  | 0,0810062 | 0,0496389 | 1 |
| 221 Stathmin-1    | 0,216511  | 1,08305  | 1,08305  | 2,83115  | 0,0664936 | 0,0430585 | 1 |
| 23 ATR_pS428      | 0,221339  | 1,09631  | 1,09631  | 2,5898   | 0,0881786 | 0,0624221 | 1 |
| 149 Notch1        | 1,95E-11  | 3,27429  | 3,27429  | 261,231  | 8,7418    | 0,0613504 | 1 |
| 113 IGFBP2        | 0,540373  | 0,938759 | -1,06524 | 2,56926  | 0,224706  | 0,160342  | 1 |
| 107 HES1          | 9,00E-07  | 4,09618  | 4,09618  | 43,8796  | 7,33319   | 0,306388  | 1 |
| 161 p53           | 0,336443  | 1,09161  | 1,09161  | 2,40202  | 0,106289  | 0,0811244 | 1 |
| 56 Chk1_pS296     | 0,40415   | 0,958307 | -1,04351 | 2,38404  | 0,0404177 | 0,0310814 | 1 |
| 66 Cyclin-D1      | 0,531901  | 0,960701 | -1,04091 | 2,24121  | 0,0517592 | 0,0423395 | 1 |
| 92 G6PD           | 0,845788  | 0,979908 | -1,0205  | 2,1683   | 0,167204  | 0,141374  | 1 |
| 157 p27_pT198     | 0,82104   | 0,983616 | -1,01666 | 2,1435   | 0,0802349 | 0,0686247 | 1 |
| 14 AMPK-a2_pS34   | 0,391724  | 0,92343  | -1,08292 | 2,12234  | 0,0877857 | 0,0758317 | 1 |
| 89 FoxM1          | 0,795726  | 0,981274 | -1,01908 | 2,09024  | 0,0810734 | 0,0711088 | 1 |
| 226 TIGAR         | 0,950174  | 0,994241 | -1,00579 | 2,02815  | 0,108713  | 0,0982706 | 1 |
| 122 JNK_pT183_Y1  | 0,85555   | 0,98605  | -1,01415 | 2,02018  | 0,0760564 | 0,0690219 | 1 |
| 153 P-Met_pY1234  | 7,25E-05  | 21,532   | 21,532   | 10,2702  | 6,56734   | 1,17234   | 1 |
| 33 Bak            | 0,144181  | 1,12682  | 1,12682  | 1,87467  | 0,0702506 | 0,0687017 | 1 |
| 234 U-Histone-H2B | 0,771409  | 1,0579   | 1,0579   | 1,55594  | 0,410705  | 0,483925  | 1 |
| 28 b-Catenin_pT4  | 0,881122  | 1,01254  | 1,01254  | 1,32746  | 0,0577034 | 0,0796934 | 1 |
| 211 Slfn11        | 0,372425  | 0,937999 | -1,0661  | 1,24644  | 0,0394885 | 0,0580819 | 1 |
| 133 MERIT40_pS29  | 0,816288  | 1,02383  | 1,02383  | 1,0799   | 0,0862763 | 0,14647   | 1 |
| 198 RBM15         | 0,828227  | 0,838571 | -1,1925  | 0,951534 | 5,1036    | 9,83319   | 1 |
| 189 PRAS40_pT246  | 0,15625   | 1,37695  | 1,37695  | 0,904605 | 0,239531  | 0,48545   | 1 |
| 246 YAP           | 0,844661  | 1,00992  | 1,00992  | 0,788196 | 0,0136047 | 0,0316444 | 1 |
| 178 PEA-15_pS116  | 0,478533  | 0,869988 | -1,14944 | 0,56699  | 0,114289  | 0,369549  | 1 |
| 222 STING         | 0,504687  | 1,76455  | 1,76455  | 0,35209  | 2,14706   | 11,1798   | 1 |

## ANOVA - Subtype B (MGT13) vs. subtype A (MGT4, 9, 11)

| #   | Protein               | p-value     | Ratio (Subtype B vs. A) | Fold change (Subtype B vs. A) | F(cell lines) | SS(cell lines) | SS(Error)  | F(Error) |
|-----|-----------------------|-------------|-------------------------|-------------------------------|---------------|----------------|------------|----------|
| 72  | E-Cadherin            | 9,26E-08    | 0,0524788               | -19,0553                      | 50,6271       | 154,73         | 5,60315    | 1        |
| 63  | Cox2                  | 0,00455839  | 0,177443                | -5,6356                       | 5,80238       | 23,967         | 7,57267    | 1        |
| 58  | Claudin-7             | 1,29E-05    | 0,23386                 | -4,27607                      | 20,2027       | 31,189         | 2,83031    | 1        |
| 168 | PAR                   | 0,0322396   | 0,279868                | -3,57312                      | 3,96584       | 20,7026        | 9,57041    | 1        |
| 154 | p16INK4a              | 4,85E-08    | 0,285726                | -3,49986                      | 61,1803       | 4,11802        | 0,123401   | 1        |
| 7   | 53BP1                 | 0,00715569  | 0,335124                | -2,98397                      | 3,72702       | 8,23053        | 4,04863    | 1        |
| 18  | ARID1A                | 0,0102002   | 0,377984                | -2,64561                      | 3,43223       | 6,68877        | 3,57282    | 1        |
| 93  | Gab2                  | 1,49E-05    | 0,388619                | -2,57321                      | 20,7642       | 2,40937        | 0,21273    | 1        |
| 195 | Rad50                 | 6,55E-07    | 0,450477                | -2,21987                      | 40,8683       | 3,70815        | 0,166346   | 1        |
| 237 | VASP                  | 7,86E-05    | 0,533786                | -1,87341                      | 10,586        | 0,902805       | 0,156352   | 1        |
| 29  | B-Raf                 | 0,932125    | 0,998138                | -1,00187                      | 111,25        | 0,617595       | 0,0101776  | 1        |
| 104 | HER3                  | 1,22E-05    | 0,576685                | -1,73405                      | 21,6693       | 2,19332        | 0,185566   | 1        |
| 44  | c-Myc                 | 4,85E-06    | 0,583984                | -1,71238                      | 18,0174       | 1,00698        | 0,102464   | 1        |
| 20  | Atg7                  | 0,958228    | 1,0018                  | 1,0018                        | 90,159        | 1,23961        | 0,0252068  | 1        |
| 61  | Connexin-43           | 0,00034275  | 0,584679                | -1,71034                      | 15,6721       | 3,01638        | 0,352858   | 1        |
| 118 | IRS1                  | 0,000128719 | 0,587368                | -1,70251                      | 21,6986       | 2,81443        | 0,237794   | 1        |
| 65  | Cyclin-B1             | 0,120747    | 1,09697                 | 1,09697                       | 82,2768       | 3,5958         | 0,0801235  | 1        |
| 62  | Cox-IV                | 0,140669    | 1,09986                 | 1,09986                       | 81,2113       | 3,84541        | 0,0868097  | 1        |
| 134 | Merlin                | 0,000554037 | 0,610809                | -1,63717                      | 5,0951        | 0,56156        | 0,202062   | 1        |
| 42  | c-Jun_pS73            | 4,30E-09    | 0,619042                | -1,6154                       | 116,358       | 1,45267        | 0,0228882  | 1        |
| 187 | PLK1                  | 0,102764    | 1,12577                 | 1,12577                       | 74,7899       | 4,09094        | 0,100282   | 1        |
| 26  | b-Actin               | 0,000163746 | 0,661434                | -1,51187                      | 7,4584        | 0,493307       | 0,121259   | 1        |
| 86  | FAK_pY397             | 0,045405    | 0,662017                | -1,51054                      | 6,81998       | 3,40543        | 0,915442   | 1        |
| 96  | GCN5L2                | 4,01E-05    | 0,662375                | -1,50972                      | 22,6414       | 1,42422        | 0,115323   | 1        |
| 145 | N-Cadherin            | 0,797114    | 1,00429                 | 1,00429                       | 64,9493       | 0,208575       | 0,00588748 | 1        |
| 6   | 4E-BP1_pS65           | 0,000126524 | 0,674848                | -1,48182                      | 17,6814       | 1,46513        | 0,151915   | 1        |
| 111 | HSP70                 | 3,24E-07    | 0,676037                | -1,47921                      | 26,2536       | 0,374713       | 0,0261668  | 1        |
| 188 | PMS2                  | 0,489107    | 0,972554                | -1,02822                      | 60,6591       | 1,46813        | 0,0443722  | 1        |
| 123 | LC3A-B                | 0,666452    | 0,977938                | -1,02256                      | 58,4615       | 1,87329        | 0,0587456  | 1        |
| 142 | Myosin-Heavy-Chain-11 | 0,941442    | 1,00452                 | 1,00452                       | 58,0716       | 2,47971        | 0,078285   | 1        |
| 147 | NDRG1_pT346           | 0,0176701   | 0,676271                | -1,4787                       | 15,1644       | 5,64423        | 0,682373   | 1        |
| 143 | Myosin-IIa_pS1943     | 0,677581    | 1,0343                  | 1,0343                        | 56,6744       | 4,16063        | 0,13459    | 1        |
| 5   | 4E-BP1                | 5,14E-07    | 0,683945                | -1,46211                      | 83,065        | 1,3759         | 0,0303675  | 1        |
| 46  | C-Raf_pS338           | 5,62E-05    | 0,685341                | -1,45913                      | 17,2098       | 0,742969       | 0,0791471  | 1        |
| 217 | Src_pY527             | 0,00310425  | 0,705281                | -1,41787                      | 11,0253       | 1,13465        | 0,188674   | 1        |
| 166 | PAK1                  | 0,355714    | 0,955222                | -1,04688                      | 49,2351       | 1,5473         | 0,0576156  | 1        |
| 203 | RPA32_pS4_S8          | 5,41E-05    | 0,706291                | -1,41585                      | 14,4553       | 0,444965       | 0,0564341  | 1        |
| 227 | TRIM25                | 0,351887    | 1,09383                 | 1,09383                       | 45,9436       | 4,35433        | 0,173755   | 1        |
| 119 | Jagged1               | 4,98E-05    | 0,72266                 | -1,38378                      | 20,9169       | 0,677713       | 0,0594006  | 1        |
| 148 | NF-kB-p65_pS536       | 0,000171846 | 0,733165                | -1,36395                      | 9,70749       | 0,315754       | 0,0596325  | 1        |
| 169 | PARP                  | 0,00262143  | 0,735164                | -1,36024                      | 9,62553       | 1,05198        | 0,200366   | 1        |
| 75  | EGFR                  | 0,00274615  | 0,758143                | -1,31901                      | 3,12587       | 0,163053       | 0,0956314  | 1        |
| 35  | Bcl-xL                | 0,00584901  | 0,769068                | -1,30028                      | 4,17741       | 0,376623       | 0,165288   | 1        |
| 27  | b-Catenin             | 0,000695335 | 0,775379                | -1,28969                      | 19,371        | 1,03206        | 0,0976768  | 1        |
| 215 | Sox2                  | 0,00361076  | 0,791867                | -1,26284                      | 19,6576       | 1,20302        | 0,112197   | 1        |
| 238 | VEGFR-2               | 5,44E-05    | 0,795888                | -1,25646                      | 57,4204       | 0,813718       | 0,0259806  | 1        |
| 138 | MSH6                  | 0,000808125 | 0,802907                | -1,24547                      | 10,5037       | 0,348983       | 0,0609123  | 1        |
| 213 | Smad3                 | 0,00106329  | 0,804585                | -1,24288                      | 6,38273       | 0,233252       | 0,0669977  | 1        |
| 167 | PAK4                  | 0,00195353  | 0,804994                | -1,24224                      | 13,7548       | 0,466078       | 0,0621221  | 1        |
| 177 | PEA-15                | 0,0071599   | 0,810941                | -1,23314                      | 6,15327       | 0,346978       | 0,10338    | 1        |
| 144 | Myt1                  | 0,715015    | 1,00793                 | 1,00793                       | 27,5113       | 0,17194        | 0,0114579  | 1        |
| 176 | PDK1_pS241            | 1,54E-05    | 0,811401                | -1,23244                      | 35,1936       | 0,390214       | 0,0203273  | 1        |
| 71  | DUSP4                 | 0,000312223 | 0,819547                | -1,22019                      | 17,8602       | 0,340866       | 0,0349897  | 1        |
| 223 | TAZ                   | 8,36E-05    | 0,821571                | -1,21718                      | 14,9438       | 0,237227       | 0,0291034  | 1        |
| 73  | eEF2                  | 0,0269716   | 0,822052                | -1,21647                      | 4,95311       | 0,381503       | 0,141209   | 1        |
| 159 | p38_pT180_Y182        | 5,65E-05    | 0,832394                | -1,20135                      | 24,6677       | 0,308891       | 0,0229572  | 1        |
| 225 | TFRC                  | 0,135824    | 1,14127                 | 1,14127                       | 23,0032       | 3,23592        | 0,2579     | 1        |
| 232 | TUFM                  | 0,0075522   | 0,833148                | -1,20027                      | 3,36369       | 0,152081       | 0,0828898  | 1        |
| 82  | ER-a_pS118            | 0,000232118 | 0,833625                | -1,19958                      | 14,7376       | 0,266244       | 0,0331203  | 1        |
| 43  | c-Kit                 | 0,00079813  | 0,835262                | -1,19723                      | 9,67881       | 0,248033       | 0,0469817  | 1        |
| 190 | PREX1                 | 0,000925702 | 0,83882                 | -1,19215                      | 10,3415       | 0,233884       | 0,041463   | 1        |
| 200 | Rictor                | 6,88E-06    | 0,840881                | -1,18923                      | 27,7896       | 0,161173       | 0,0106329  | 1        |
| 79  | eIF4G                 | 0,000568829 | 0,846252                | -1,18168                      | 6,89226       | 0,109649       | 0,0291666  | 1        |
| 240 | Wee1_pS642            | 0,00175013  | 0,846517                | -1,18131                      | 8,22266       | 0,209994       | 0,0468206  | 1        |
| 68  | DJ1                   | 0,000678414 | 0,846762                | -1,18097                      | 11,0921       | 0,209944       | 0,0347     | 1        |
| 14  | AMPK-a2_pS345         | 0,0236485   | 0,848719                | -1,17825                      | 2,12234       | 0,0877857      | 0,0758317  | 1        |
| 162 | p70-S6K1              | 0,00445748  | 0,852006                | -1,1737                       | 7,05292       | 0,193159       | 0,0502098  | 1        |
| 193 | Rab11                 | 0,0272591   | 0,867593                | -1,15261                      | 3,07432       | 0,107638       | 0,0641887  | 1        |
| 77  | eIF4E                 | 2,50E-06    | 0,868193                | -1,15182                      | 105,413       | 0,35314        | 0,0061418  | 1        |

|     |                      |             |          |          |         |           |            |   |
|-----|----------------------|-------------|----------|----------|---------|-----------|------------|---|
| 150 | Notch3               | 0,000778652 | 0,87155  | -1,14738 | 4,82015 | 0,0564768 | 0,0214808  | 1 |
| 170 | Paxillin             | 0,883219    | 1,0039   | 1,0039   | 19,796  | 0,194305  | 0,0179948  | 1 |
| 163 | p70-S6K_pT389        | 0,0750696   | 1,20811  | 1,20811  | 19,7553 | 2,1438    | 0,198949   | 1 |
| 47  | Caspase-3            | 0,00844546  | 0,876076 | -1,14145 | 10,1404 | 0,28436   | 0,0514109  | 1 |
| 97  | Glutamate-D1-2       | 0,00156385  | 0,876338 | -1,14111 | 15,1267 | 0,181095  | 0,0219485  | 1 |
| 66  | Cyclin-D1            | 0,0110868   | 0,876358 | -1,14109 | 2,24121 | 0,0517592 | 0,0423395  | 1 |
| 21  | ATM                  | 0,416287    | 1,04712  | 1,04712  | 18,4361 | 0,970152  | 0,0964744  | 1 |
| 175 | PKD1                 | 0,00390704  | 0,881331 | -1,13465 | 9,15835 | 0,134561  | 0,0269365  | 1 |
| 228 | TSC1                 | 0,000285401 | 0,881672 | -1,13421 | 227,87  | 1,22223   | 0,00983348 | 1 |
| 184 | PKCa                 | 0,93687     | 0,993551 | -1,00649 | 18,1378 | 1,02674   | 0,103781   | 1 |
| 156 | p27-Kip-1            | 2,47E-05    | 0,884919 | -1,13005 | 12,5046 | 0,0442074 | 0,00648135 | 1 |
| 152 | P-Cadherin           | 0,0207777   | 0,888225 | -1,12584 | 7,73996 | 0,194149  | 0,0459873  | 1 |
| 55  | CDK1                 | 0,00810602  | 0,89763  | -1,11404 | 184,164 | 4,38771   | 0,0436792  | 1 |
| 196 | Rad51                | 0,0171023   | 0,90032  | -1,11072 | 13,7869 | 0,317955  | 0,0422807  | 1 |
| 212 | Smad1                | 0,0456033   | 0,907502 | -1,10193 | 4,05    | 0,0956214 | 0,0432855  | 1 |
| 132 | MEK1_pS217_S221      | 0,00533167  | 0,917191 | -1,09029 | 6,74308 | 0,0568754 | 0,0154635  | 1 |
| 78  | eIF4E_pS209          | 0,0168423   | 0,925611 | -1,08037 | 5,70269 | 0,0556886 | 0,0179031  | 1 |
| 9   | ACC1                 | 0,700552    | 0,974509 | -1,02616 | 15,9361 | 1,4716    | 0,169296   | 1 |
| 106 | Heregulin            | 0,405603    | 0,92521  | -1,08084 | 15,8753 | 1,22152   | 0,141065   | 1 |
| 136 | MMP2                 | 0,00235366  | 0,93169  | -1,07332 | 5,4171  | 0,0235161 | 0,00795865 | 1 |
| 39  | BRD4                 | 0,41524     | 1,02915  | 1,02915  | 15,2571 | 0,215063  | 0,0258425  | 1 |
| 4   | 14-3-3-zeta          | 0,0239199   | 0,9395   | -1,0644  | 33,826  | 0,267897  | 0,0145197  | 1 |
| 84  | Ets-1                | 0,0221805   | 0,95226  | -1,05013 | 4,43743 | 0,020748  | 0,00857209 | 1 |
| 229 | TTF1                 | 0,268852    | 0,973228 | -1,02751 | 15,007  | 0,108667  | 0,0132754  | 1 |
| 91  | FoxO3a-(p_S318-S321) | 0,0462245   | 1,04054  | 1,04054  | 5,07456 | 0,0205944 | 0,00744033 | 1 |
| 22  | ATM_pS1981           | 0,0380081   | 1,0421   | 1,0421   | 26,8204 | 0,106612  | 0,00728759 | 1 |
| 87  | FASN                 | 0,559426    | 0,962304 | -1,03917 | 14,6017 | 0,886435  | 0,111297   | 1 |
| 116 | IR-b                 | 0,0758736   | 1,12175  | 1,12175  | 14,4859 | 0,963358  | 0,121922   | 1 |
| 243 | XBP-1                | 0,0368888   | 1,05254  | 1,05254  | 13,4597 | 0,085545  | 0,011652   | 1 |
| 179 | PI3K-p110-a          | 0,00019083  | 1,07763  | 1,07763  | 17,5983 | 0,0447948 | 0,00466657 | 1 |
| 231 | Tuberin_pT1462       | 0,647424    | 1,01421  | 1,01421  | 14,1568 | 0,169301  | 0,0219248  | 1 |
| 186 | PLC-gamma2_pY759     | 0,0243459   | 1,08204  | 1,08204  | 6,24204 | 0,0866953 | 0,025463   | 1 |
| 244 | XPF                  | 0,00427448  | 1,08439  | 1,08439  | 5,6978  | 0,036381  | 0,011706   | 1 |
| 11  | Akt                  | 0,735998    | 1,01353  | 1,01353  | 13,6563 | 0,261477  | 0,0351029  | 1 |
| 31  | B7-H4                | 0,000425646 | 1,09645  | 1,09645  | 55,7304 | 0,254248  | 0,00836387 | 1 |
| 209 | SHP-2_pY542          | 0,307113    | 1,05359  | 1,05359  | 13,4274 | 0,381753  | 0,0521231  | 1 |
| 50  | CD134                | 0,0102322   | 1,09653  | 1,09653  | 6,86224 | 0,0886066 | 0,0236724  | 1 |
| 135 | MIF                  | 0,703097    | 0,987199 | -1,01297 | 12,857  | 0,162293  | 0,023142   | 1 |
| 69  | DM-Histone-H3        | 0,00886289  | 1,09863  | 1,09863  | 16,9499 | 0,224844  | 0,0243195  | 1 |
| 214 | SOD2                 | 0,00295949  | 1,10036  | 1,10036  | 35,5291 | 0,303646  | 0,0156684  | 1 |
| 108 | Hexokinase-II        | 0,00411948  | 1,1038   | 1,1038   | 22,6331 | 0,23349   | 0,0189132  | 1 |
| 45  | C-Raf                | 0,975277    | 1,0009   | 1,0009   | 12,349  | 0,127875  | 0,0189843  | 1 |
| 81  | ER                   | 0,151447    | 0,963075 | -1,03834 | 12,1807 | 0,0968804 | 0,0145816  | 1 |
| 105 | HER3_pY1289          | 0,753547    | 0,991278 | -1,0088  | 12,0771 | 0,118349  | 0,0179656  | 1 |
| 164 | p90RSK_pT573         | 0,536997    | 0,962192 | -1,03929 | 11,5145 | 0,621942  | 0,0990253  | 1 |
| 40  | c-Abl                | 0,00049692  | 1,10932  | 1,10932  | 5,76258 | 0,0348276 | 0,0110802  | 1 |
| 17  | AR                   | 0,0266135   | 1,1102   | 1,1102   | 7,24728 | 0,173602  | 0,0439159  | 1 |
| 140 | mTOR                 | 0,000486706 | 1,11241  | 1,11241  | 21,6487 | 0,141672  | 0,0119976  | 1 |
| 100 | GSK-3a-b_pS21_S9     | 0,00147089  | 1,12488  | 1,12488  | 49,6985 | 0,584682  | 0,0215684  | 1 |
| 185 | PKM2                 | 0,161928    | 1,0878   | 1,0878   | 10,8879 | 0,454477  | 0,0765257  | 1 |
| 171 | PD-L1                | 0,155913    | 1,04872  | 1,04872  | 10,7281 | 0,133421  | 0,0228005  | 1 |
| 37  | Bid                  | 0,546167    | 0,970957 | -1,02991 | 10,6969 | 0,434923  | 0,074541   | 1 |
| 30  | B-Raf_pS445          | 0,442357    | 1,03252  | 1,03252  | 10,5878 | 0,221288  | 0,0383174  | 1 |
| 236 | ULK1_pS757           | 0,0179527   | 1,13116  | 1,13116  | 23,8444 | 0,644312  | 0,0495395  | 1 |
| 141 | mTOR_pS2448          | 0,00444242  | 1,13712  | 1,13712  | 12,5741 | 0,210657  | 0,0307143  | 1 |
| 98  | Glutaminase          | 0,00708487  | 1,14106  | 1,14106  | 80,6271 | 1,4637    | 0,0332823  | 1 |
| 245 | XRCC1                | 0,014799    | 1,14133  | 1,14133  | 9,47025 | 0,333549  | 0,0645713  | 1 |
| 197 | Raptor               | 0,35991     | 1,02476  | 1,02476  | 10,2826 | 0,0973311 | 0,0173536  | 1 |
| 51  | CD20                 | 0,00147571  | 1,14397  | 1,14397  | 10,3099 | 0,151296  | 0,0269041  | 1 |
| 110 | HSP27_pS82           | 0,471567    | 0,932331 | -1,07258 | 10,1753 | 1,07461   | 0,193617   | 1 |
| 36  | Beclin               | 0,601858    | 1,01676  | 1,01676  | 10,1533 | 0,129077  | 0,0233067  | 1 |
| 180 | PI3K-p85             | 0,000227896 | 1,16881  | 1,16881  | 65,5844 | 0,787884  | 0,0220243  | 1 |
| 49  | Caveolin-1           | 0,204318    | 1,15842  | 1,15842  | 10,0118 | 1,9585    | 0,358633   | 1 |
| 76  | EGFR_pY1173          | 0,308719    | 0,978301 | -1,02218 | 9,80828 | 0,056272  | 0,0105182  | 1 |
| 208 | Shc_pY317            | 0,0115756   | 1,17928  | 1,17928  | 6,59602 | 0,258832  | 0,0719412  | 1 |
| 127 | MAPK_pT202_Y204      | 0,00135986  | 1,17994  | 1,17994  | 18,2811 | 0,389619  | 0,0390732  | 1 |
| 131 | MEK1                 | 0,00869448  | 1,18093  | 1,18093  | 23,975  | 1,28431   | 0,098209   | 1 |
| 160 | p44-42-MAPK          | 8,92E-05    | 1,18158  | 1,18158  | 48,2315 | 0,455429  | 0,0173114  | 1 |
| 139 | MSI2                 | 2,18E-05    | 1,18178  | 1,18178  | 18,0605 | 0,144807  | 0,0146995  | 1 |
| 249 | ZAP-70               | 0,30524     | 1,03589  | 1,03589  | 9,2011  | 0,145113  | 0,0289141  | 1 |
| 174 | PDHK1                | 0,000121269 | 1,18278  | 1,18278  | 28,3303 | 0,29458   | 0,019063   | 1 |
| 239 | Wee1                 | 0,0188      | 1,18684  | 1,18684  | 9,40644 | 0,667283  | 0,130055   | 1 |
| 151 | 04-oct               | 0,194053    | 1,02722  | 1,02722  | 8,60402 | 0,0456702 | 0,00973133 | 1 |

|                           |             |          |          |         |           |            |   |
|---------------------------|-------------|----------|----------|---------|-----------|------------|---|
| 191 Progesterone-Receptor | 1,02E-08    | 1,20182  | 1,20182  | 94,235  | 0,221118  | 0,00430183 | 1 |
| 137 Mnk1                  | 0,254237    | 0,947779 | -1,0551  | 8,53919 | 0,256266  | 0,0550193  | 1 |
| 80 Elk1_pS383             | 0,243206    | 0,966507 | -1,03465 | 8,30934 | 0,0843929 | 0,01862    | 1 |
| 83 ERCC5                  | 0,010715    | 1,22537  | 1,22537  | 5,40905 | 0,348821  | 0,118229   | 1 |
| 224 TFAM                  | 0,374221    | 1,07073  | 1,07073  | 8,10877 | 0,744333  | 0,168288   | 1 |
| 25 Axl                    | 6,31E-05    | 1,22942  | 1,22942  | 41,9318 | 0,580668  | 0,0253878  | 1 |
| 53 cdc25C                 | 0,399524    | 1,05947  | 1,05947  | 7,90478 | 0,588719  | 0,13654    | 1 |
| 102 Gys_pS641             | 3,62E-06    | 1,24086  | 1,24086  | 189,262 | 1,40427   | 0,0136028  | 1 |
| 74 eEF2K                  | 0,0539679   | 0,806347 | -1,24016 | 7,71876 | 1,10977   | 0,263588   | 1 |
| 115 INPP4b                | 0,800602    | 1,00694  | 1,00694  | 7,69294 | 0,0688118 | 0,0163988  | 1 |
| 182 PKC-b-II_pS660        | 0,988281    | 0,99904  | -1,00096 | 7,55104 | 0,363053  | 0,0881463  | 1 |
| 48 Caspase-7-cleaved      | 0,064765    | 1,09409  | 1,09409  | 7,46312 | 0,198301  | 0,048713   | 1 |
| 230 Tuberin               | 0,000658781 | 1,24322  | 1,24322  | 8,06143 | 0,324571  | 0,0738141  | 1 |
| 183 PKC-delta_pS664       | 0,0775669   | 1,03718  | 1,03718  | 7,28739 | 0,0321434 | 0,00808651 | 1 |
| 155 p21                   | 0,000457045 | 1,24925  | 1,24925  | 7,13402 | 0,169398  | 0,0435327  | 1 |
| 60 Collagen-VI            | 0,00309077  | 1,25961  | 1,25961  | 13,1673 | 0,713145  | 0,0992937  | 1 |
| 90 FoxO3a                 | 0,326212    | 1,03329  | 1,03329  | 7,09168 | 0,0949975 | 0,0245586  | 1 |
| 52 CD4                    | 0,258857    | 1,05954  | 1,05954  | 7,06838 | 0,237332  | 0,0615571  | 1 |
| 94 GATA6                  | 0,000113335 | 1,26315  | 1,26315  | 6,86886 | 0,135719  | 0,036224   | 1 |
| 3 14-3-3-beta             | 0,994291    | 0,999848 | -1,00015 | 7,01879 | 0,0383397 | 0,0100145  | 1 |
| 13 Akt_pT308              | 0,00215215  | 1,26606  | 1,26606  | 19,8553 | 1,27872   | 0,11807    | 1 |
| 10 ACC_pS79               | 0,0783184   | 1,27535  | 1,27535  | 6,88379 | 2,70112   | 0,719379   | 1 |
| 112 IGF1R_pY1135_Y1136    | 2,51E-06    | 1,2702   | 1,2702   | 21,4428 | 0,272795  | 0,0233237  | 1 |
| 202 RIP                   | 0,0243554   | 1,2764   | 1,2764   | 3,09244 | 0,437652  | 0,25946    | 1 |
| 19 Atg3                   | 0,00106264  | 1,29079  | 1,29079  | 11,0157 | 0,46522   | 0,0774264  | 1 |
| 38 Bim                    | 0,108906    | 0,723765 | -1,38166 | 6,77479 | 5,19634   | 1,40619    | 1 |
| 199 Rb_pS807_S811         | 0,0130711   | 1,29452  | 1,29452  | 14,168  | 2,7481    | 0,355602   | 1 |
| 125 LDHA                  | 0,00151046  | 1,32629  | 1,32629  | 19,2759 | 1,35548   | 0,12892    | 1 |
| 41 c-IAP2                 | 0,747176    | 1,00905  | 1,00905  | 6,4537  | 0,0613278 | 0,0174217  | 1 |
| 210 SLC1A5                | 0,00888782  | 1,33153  | 1,33153  | 5,08099 | 0,946591  | 0,341551   | 1 |
| 207 SDHA                  | 8,99E-06    | 1,3588   | 1,3588   | 12,7619 | 0,273363  | 0,0392706  | 1 |
| 247 YAP_pS127             | 0,00044078  | 1,36972  | 1,36972  | 37,918  | 2,09533   | 0,101309   | 1 |
| 57 Chk2_pT68              | 0,374469    | 1,03771  | 1,03771  | 5,93181 | 0,140716  | 0,0434908  | 1 |
| 109 Histone-H3            | 0,124636    | 0,873953 | -1,14423 | 5,92002 | 0,561613  | 0,173922   | 1 |
| 120 Jak2                  | 0,676892    | 0,985752 | -1,01445 | 5,87721 | 0,0853043 | 0,0266098  | 1 |
| 216 Src-(phospho-Y416)    | 0,813303    | 1,02445  | 1,02445  | 5,81883 | 0,827672  | 0,260774   | 1 |
| 59 COG3                   | 1,30E-06    | 1,38309  | 1,38309  | 38,9353 | 0,588651  | 0,0277176  | 1 |
| 107 HES1                  | 0,000318396 | 1,40833  | 1,40833  | 43,8796 | 7,33319   | 0,306388   | 1 |
| 85 FAK                    | 0,123423    | 0,924317 | -1,08188 | 5,73598 | 0,170349  | 0,054447   | 1 |
| 15 AMPKa                  | 0,102413    | 1,09626  | 1,09626  | 5,72029 | 0,200858  | 0,0643744  | 1 |
| 219 Stat3_pY705           | 1,10E-07    | 1,41198  | 1,41198  | 62,5686 | 0,749615  | 0,0219646  | 1 |
| 12 Akt_pS473              | 0,000280348 | 1,44492  | 1,44492  | 18,3478 | 1,69049   | 0,168916   | 1 |
| 121 JNK2                  | 0,484001    | 0,978116 | -1,02237 | 5,46307 | 0,0676374 | 0,0226982  | 1 |
| 99 Granzyme-B             | 1,48E-05    | 1,44578  | 1,44578  | 41,2121 | 1,35911   | 0,0604605  | 1 |
| 204 RSK                   | 4,24E-10    | 1,49652  | 1,49652  | 326,695 | 2,16415   | 0,0121447  | 1 |
| 192 PTEN                  | 1,28E-06    | 1,5068   | 1,5068   | 36,5922 | 1,00525   | 0,0503651  | 1 |
| 205 S6_pS235_S236         | 0,0450751   | 1,54927  | 1,54927  | 8,58233 | 5,39909   | 1,15334    | 1 |
| 101 Gys                   | 1,39E-09    | 1,56809  | 1,56809  | 324,947 | 2,62375   | 0,014803   | 1 |
| 70 DM-K9-Histone-H3       | 0,114037    | 0,945754 | -1,05736 | 5,04787 | 0,0706856 | 0,0256723  | 1 |
| 54 Cdc2_pY15              | 0,853437    | 0,98877  | -1,01136 | 5,02374 | 0,279873  | 0,102135   | 1 |
| 194 Rab25                 | 0,338673    | 1,04116  | 1,04116  | 4,99539 | 0,0956965 | 0,0351211  | 1 |
| 128 Mcl-1                 | 6,57E-05    | 1,57347  | 1,57347  | 11,3896 | 1,13117   | 0,18208    | 1 |
| 153 P-Met_pY1234_Y1235    | 0,00722186  | 1,59402  | 1,59402  | 10,2702 | 6,56734   | 1,17234    | 1 |
| 67 D-a-Tubulin            | 0,667794    | 0,985668 | -1,01454 | 4,74738 | 0,0633336 | 0,024458   | 1 |
| 201 Rictor_pT1135         | 0,0911178   | 1,13793  | 1,13793  | 4,62353 | 0,3117    | 0,123596   | 1 |
| 242 WIPI2                 | 0,32589     | 1,12876  | 1,12876  | 4,54417 | 0,991671  | 0,400087   | 1 |
| 248 YB1_pS102             | 0,0642147   | 1,08227  | 1,08227  | 4,53269 | 0,0910193 | 0,0368145  | 1 |
| 235 UBAC1                 | 0,428827    | 1,03021  | 1,03021  | 4,508   | 0,0808853 | 0,0328948  | 1 |
| 206 S6_pS240_S244         | 0,00161609  | 1,61514  | 1,61514  | 8,71822 | 1,99056   | 0,41859    | 1 |
| 165 PAICS                 | 0,0500058   | 0,785655 | -1,27282 | 4,40808 | 1,03963   | 0,432387   | 1 |
| 124 Lck                   | 0,160695    | 0,914763 | -1,09318 | 4,23264 | 0,228688  | 0,0990542  | 1 |
| 172 Pcdcd4                | 9,07E-08    | 1,62486  | 1,62486  | 71,9431 | 1,77986   | 0,0453565  | 1 |
| 233 Tyro3                 | 0,170435    | 1,03364  | 1,03364  | 4,15696 | 0,0302252 | 0,0133301  | 1 |
| 126 LRP6_pS1490           | 8,48E-10    | 1,63707  | 1,63707  | 66,1155 | 0,789773  | 0,0218998  | 1 |
| 181 PKA-a                 | 7,46E-10    | 1,9961   | 1,9961   | 75,668  | 2,16153   | 0,0523711  | 1 |
| 218 Stat3                 | 5,00E-06    | 2,03587  | 2,03587  | 22,5764 | 2,24621   | 0,182405   | 1 |
| 64 Creb                   | 0,376458    | 0,979757 | -1,02066 | 3,71864 | 0,0251136 | 0,0123813  | 1 |
| 130 MDM2_pS166            | 0,568461    | 0,972175 | -1,02862 | 3,7033  | 0,0906338 | 0,0448687  | 1 |
| 24 Aurora-B               | 0,295692    | 0,958726 | -1,04305 | 3,69143 | 0,0699945 | 0,0347624  | 1 |
| 32 Bad_pS112              | 0,0624282   | 1,10949  | 1,10949  | 3,55901 | 0,115742  | 0,0596216  | 1 |
| 220 Stat5a                | 3,63E-12    | 2,16972  | 2,16972  | 212,947 | 2,68086   | 0,0230804  | 1 |
| 95 GCLM                   | 0,129298    | 0,961744 | -1,03978 | 3,36925 | 0,0253068 | 0,0137703  | 1 |
| 16 AMPKa_pT172            | 4,17E-07    | 2,74143  | 2,74143  | 20,1532 | 5,16458   | 0,469821   | 1 |



|     |                    |           |          |          |          |           |           |   |
|-----|--------------------|-----------|----------|----------|----------|-----------|-----------|---|
| 241 | WIPI1              | 0,827622  | 0,978283 | -1,0222  | 3,21009  | 0,652047  | 0,372394  | 1 |
| 158 | p38-MAPK           | 0,392472  | 0,944171 | -1,05913 | 3,14191  | 0,178812  | 0,104338  | 1 |
| 149 | Notch1             | 1,28E-12  | 2,86969  | 2,86969  | 261,231  | 8,7418    | 0,0613504 | 1 |
| 114 | IGFRb              | 1,21E-12  | 2,87166  | 2,87166  | 224,45   | 5,12321   | 0,041847  | 1 |
| 129 | MCT4               | 8,25E-08  | 2,87503  | 2,87503  | 84,0128  | 9,79881   | 0,21383   | 1 |
| 34  | Bax                | 0,438382  | 0,866859 | -1,15359 | 3,06105  | 1,45184   | 0,869541  | 1 |
| 146 | NAPSIN-A           | 0,0732502 | 0,908105 | -1,10119 | 2,99184  | 0,0810062 | 0,0496389 | 1 |
| 221 | Stathmin-1         | 0,457431  | 1,03401  | 1,03401  | 2,83115  | 0,0664936 | 0,0430585 | 1 |
| 23  | ATR_pS428          | 0,566134  | 0,971562 | -1,02927 | 2,5898   | 0,0881786 | 0,0624221 | 1 |
| 103 | HER2_pY1248        | 0,723671  | 1,03284  | 1,03284  | 2,57293  | 0,36422   | 0,259524  | 1 |
| 113 | IGFBP2             | 0,269581  | 1,09608  | 1,09608  | 2,56926  | 0,224706  | 0,160342  | 1 |
| 8   | A-Raf              | 0,357691  | 0,942513 | -1,06099 | 2,42788  | 0,121051  | 0,0914079 | 1 |
| 161 | p53                | 0,197587  | 0,922828 | -1,08363 | 2,40202  | 0,106289  | 0,0811244 | 1 |
| 56  | Chk1_pS296         | 0,726063  | 0,987007 | -1,01316 | 2,38404  | 0,0404177 | 0,0310814 | 1 |
| 173 | PDGFR-b            | 6,75E-10  | 3,22331  | 3,22331  | 2680,48  | 45,9792   | 0,0314478 | 1 |
| 92  | G6PD               | 0,151232  | 1,1312   | 1,1312   | 2,1683   | 0,167204  | 0,141374  | 1 |
| 157 | p27_pT198          | 0,111426  | 0,916702 | -1,09087 | 2,1435   | 0,0802349 | 0,0686247 | 1 |
| 88  | Fibronectin        | 5,67E-07  | 3,50475  | 3,50475  | 20,1859  | 16,8349   | 1,52898   | 1 |
| 89  | FoxM1              | 0,126873  | 1,09501  | 1,09501  | 2,09024  | 0,0810734 | 0,0711088 | 1 |
| 226 | TIGAR              | 0,135172  | 0,9036   | -1,10668 | 2,02815  | 0,108713  | 0,0982706 | 1 |
| 122 | JNK_pT183_Y185     | 0,152745  | 0,921521 | -1,08516 | 2,02018  | 0,0760564 | 0,0690219 | 1 |
| 117 | IRF-1              | 0,149577  | 0,948751 | -1,05402 | 1,94612  | 0,0303863 | 0,0286253 | 1 |
| 33  | Bak                | 0,852836  | 0,990169 | -1,00993 | 1,87467  | 0,0702506 | 0,0687017 | 1 |
| 234 | U-Histone-H2B      | 0,738196  | 1,04823  | 1,04823  | 1,55594  | 0,410705  | 0,483925  | 1 |
| 28  | b-Catenin_pT41_S45 | 0,139094  | 0,913904 | -1,09421 | 1,32746  | 0,0577034 | 0,0796934 | 1 |
| 211 | Sifn11             | 0,897035  | 0,993172 | -1,00688 | 1,24644  | 0,0394885 | 0,0580819 | 1 |
| 133 | MERIT40_pS29       | 0,156747  | 1,12178  | 1,12178  | 1,0799   | 0,0862763 | 0,14647   | 1 |
| 198 | RBM15              | 0,253967  | 0,567676 | -1,76157 | 0,951534 | 5,1036    | 9,83319   | 1 |
| 189 | PRAS40_pT246       | 0,66926   | 1,06118  | 1,06118  | 0,904605 | 0,239531  | 0,48545   | 1 |
| 246 | YAP                | 0,466005  | 1,02776  | 1,02776  | 0,788196 | 0,0136047 | 0,0316444 | 1 |
| 178 | PEA-15_pS116       | 0,128782  | 0,803653 | -1,24432 | 0,56699  | 0,114289  | 0,369549  | 1 |
| 222 | STING              | 0,996961  | 0,998216 | -1,00179 | 0,35209  | 2,14706   | 11,1798   | 1 |

**Table S5.** Comparison of RPPA outcomes of *MMTV-R26<sup>Met</sup>* cells and tumors belonging to “subtype A” versus “subtype B”.

Cluster 3 (cluster with subtype A) vs. cluster 4 (cluster with subtype B)

| Protein          | logFC    | AveExpr    | t        | P.Value   | adj.P.Val  |
|------------------|----------|------------|----------|-----------|------------|
| PAR              | 1,131472 | 0,3170698  | 3,330956 | 0,0029563 | 0,04152945 |
| ARID1A           | 0,625451 | 0,0859351  | 4,062781 | 4,96E-04  | 0,02858153 |
| Histone-H3       | 0,616463 | 0,3605703  | 3,054654 | 0,0056961 | 0,05733171 |
| XRCC1            | 0,550487 | 0,1489197  | 6,796958 | 6,87E-07  | 1,70E-04   |
| ATM              | 0,481253 | 0,1386044  | 3,422094 | 0,0023745 | 0,04152945 |
| E-Cadherin       | 0,443419 | 0,1698936  | 2,34252  | 0,0283516 | 0,1024357  |
| VASP             | 0,430123 | 0,1169322  | 2,906673 | 0,008042  | 0,06207435 |
| Rictor           | 0,402752 | 0,3815294  | 3,060335 | 0,0056207 | 0,05733171 |
| P-Cadherin       | 0,400019 | 0,0334093  | 1,909318 | 0,0690093 | 0,17902479 |
| eIF4G            | 0,398827 | 0,0164296  | 3,67933  | 0,0012718 | 0,03925799 |
| RBM15            | 0,374286 | 0,0558702  | 3,587849 | 0,0015894 | 0,03925799 |
| CDK1             | 0,367319 | 0,2349106  | 2,646612 | 0,0145488 | 0,07645874 |
| 53BP1            | 0,348198 | 0,1029189  | 2,691726 | 0,0131446 | 0,07189393 |
| TAZ              | 0,340197 | -0,0059708 | 3,046745 | 0,0058028 | 0,05733171 |
| 4E-BP1           | 0,333041 | 0,1455759  | 3,325777 | 0,0029933 | 0,04152945 |
| Stat3            | 0,328124 | 0,0928596  | 3,007286 | 0,0063644 | 0,05822247 |
| beta-Catenin     | 0,324496 | 0,0162367  | 2,143181 | 0,043113  | 0,12986481 |
| Claudin-7        | 0,316824 | 0,1779344  | 2,562707 | 0,0175428 | 0,08405637 |
| ACC1             | 0,31187  | -0,2919491 | 1,689445 | 0,104897  | 0,23990341 |
| WIPI1            | 0,287525 | 0,1169281  | 2,937817 | 0,0074821 | 0,06063795 |
| Notch1           | 0,256416 | 0,0348844  | 2,150548 | 0,0424624 | 0,12948413 |
| Rad50            | 0,252598 | 0,0485918  | 2,930486 | 0,0076104 | 0,06063795 |
| MERIT40_pS29     | 0,236574 | 0,0348573  | 2,887791 | 0,0084007 | 0,06287832 |
| GCN5L2           | 0,228901 | 0,1400084  | 2,546477 | 0,0181848 | 0,08405637 |
| FASN             | 0,223324 | -0,2280732 | 1,474832 | 0,1540659 | 0,31192027 |
| DM-K9-Histone-H3 | 0,221614 | 0,0792837  | 3,479287 | 0,0020682 | 0,04152945 |
| PARP             | 0,21735  | 0,1754915  | 2,170756 | 0,040723  | 0,12573225 |
| DM-Histone-H3    | 0,21678  | 0,0015729  | 2,793482 | 0,0104327 | 0,06750283 |
| TUFM             | 0,215179 | -0,1295122 | 3,427262 | 0,0023451 | 0,04152945 |
| Bim              | 0,208428 | 0,120133   | 2,008825 | 0,0566601 | 0,15550059 |
| 4E-BP1_pS65      | 0,207393 | 0,1963715  | 2,611425 | 0,0157408 | 0,07934629 |
| Bax              | 0,205523 | 0,0459626  | 2,362578 | 0,0271577 | 0,10011854 |
| Caspase-3        | 0,203513 | 0,053363   | 3,115907 | 0,0049315 | 0,05733171 |
| Rab25            | 0,19528  | 0,053111   | 2,942803 | 0,007396  | 0,06063795 |
| DUSP4            | 0,192819 | -0,034058  | 1,63052  | 0,1168633 | 0,25608136 |
| ER-alpha_pS118   | 0,191709 | -0,0097066 | 4,014505 | 5,59E-04  | 0,02858153 |
| Gab2             | 0,187292 | 0,2209397  | 2,027495 | 0,0545749 | 0,15146063 |
| c-Jun_pS73       | 0,187168 | 0,1662713  | 1,583037 | 0,1273203 | 0,2750364  |
| p70-S6K1         | 0,185401 | 0,1487478  | 1,941728 | 0,0647494 | 0,17383816 |
| Bcl-xL           | 0,18301  | -0,0045359 | 2,377068 | 0,0263241 | 0,09851602 |
| B-Raf            | 0,182396 | 0,119589   | 2,176267 | 0,0402599 | 0,12573225 |
| AR               | 0,179985 | -0,1801834 | 1,721602 | 0,0988159 | 0,23025968 |
| IR-b             | 0,178742 | 0,1179838  | 1,763467 | 0,0913511 | 0,22057594 |
| PAK1             | 0,177609 | 0,0452871  | 1,969404 | 0,0612968 | 0,16637706 |

|                    |          |            |          |           |            |
|--------------------|----------|------------|----------|-----------|------------|
| RIP                | 0,172828 | -0,1031336 | 1,449313 | 0,1609979 | 0,31813179 |
| VEGFR-2            | 0,170852 | 0,112644   | 1,91996  | 0,0675841 | 0,17902479 |
| Smad3              | 0,163193 | -0,0207871 | 2,986563 | 0,0066799 | 0,05892596 |
| Myt1               | 0,147849 | -0,0118133 | 2,625587 | 0,0152504 | 0,07847609 |
| Hexokinase-II      | 0,146195 | -0,0752403 | 3,065559 | 0,0055521 | 0,05733171 |
| AMPK_pT172         | 0,145741 | 0,0074493  | 1,501703 | 0,1470302 | 0,30013613 |
| DJ-1               | 0,141801 | 0,0489347  | 1,203647 | 0,2411937 | 0,42553468 |
| Merlin             | 0,13962  | -0,0647313 | 1,65167  | 0,1124426 | 0,25248474 |
| Connexin-43        | 0,133795 | 0,0121025  | 0,85322  | 0,4024979 | 0,59110886 |
| SOD2               | 0,132995 | -0,0158534 | 2,529887 | 0,0188637 | 0,08471496 |
| ATR_pS428          | 0,131701 | -0,0822292 | 2,189481 | 0,0391689 | 0,124035   |
| MIF                | 0,126377 | 0,1137327  | 2,483055 | 0,0209097 | 0,08904635 |
| Smad1              | 0,126119 | 0,0125196  | 1,803546 | 0,0846632 | 0,20704768 |
| p27_pT198          | 0,12259  | -0,0775066 | 2,440183 | 0,0229618 | 0,09452611 |
| Chk2_pT68          | 0,121915 | 0,0296161  | 1,224318 | 0,2334535 | 0,41784797 |
| GATA6              | 0,11837  | -0,0708088 | 1,849068 | 0,0775839 | 0,19554318 |
| mTOR               | 0,112892 | 0,0728351  | 1,263187 | 0,2194103 | 0,40443542 |
| b-Catenin_pT41_S45 | 0,112507 | 0,0870738  | 1,433354 | 0,1654593 | 0,32435275 |
| A-Raf              | 0,111316 | 0,0495721  | 1,906472 | 0,0693948 | 0,17902479 |
| Notch3             | 0,11089  | 0,0179976  | 2,520372 | 0,0192636 | 0,08496624 |
| c-Kit              | 0,109967 | -0,0346328 | 2,541729 | 0,0183767 | 0,08405637 |
| CD4                | 0,109381 | -0,1543716 | 1,723178 | 0,0985256 | 0,23025968 |
| Raptor             | 0,106089 | 0,0743287  | 1,270748 | 0,2167555 | 0,40254593 |
| cdc25C             | 0,105267 | -0,0550074 | 1,087078 | 0,288471  | 0,47820368 |
| c-Myc              | 0,104214 | 0,1120016  | 1,154996 | 0,2601691 | 0,4462622  |
| IRS1               | 0,101347 | 0,0292407  | 0,925277 | 0,3646062 | 0,55497351 |
| WIPI2              | 0,1013   | -0,1982764 | 1,070823 | 0,2955621 | 0,48028836 |
| EGFR               | 0,099325 | 0,1196557  | 1,526609 | 0,1407455 | 0,29213552 |
| C-Raf              | 0,097531 | -0,0158396 | 1,731508 | 0,0970041 | 0,23025968 |
| RPA32_pS4_S8       | 0,097246 | 0,0030646  | 1,077405 | 0,2926762 | 0,48028836 |
| Bid                | 0,092652 | -0,0289827 | 1,315894 | 0,2014139 | 0,37976522 |
| Tyro3              | 0,090933 | -0,0275295 | 1,825937 | 0,0811143 | 0,20125619 |
| IGFRb              | 0,085766 | 0,0774075  | 0,529761 | 0,6014485 | 0,77315301 |
| SDHA               | 0,083141 | -0,0625461 | 1,325743 | 0,1981819 | 0,37654562 |
| Glutaminase        | 0,082261 | -0,0878491 | 1,096358 | 0,2844782 | 0,47477109 |
| MEK1_pS217_S221    | 0,079621 | -0,0247615 | 1,759823 | 0,0919811 | 0,22057594 |
| eIF4E              | 0,076387 | -0,0104446 | 0,6724   | 0,5081521 | 0,69729755 |
| PI3K-p110-a        | 0,076263 | 0,0773417  | 1,630262 | 0,1169183 | 0,25608136 |
| YAP                | 0,072962 | -0,0114551 | 1,115955 | 0,2761775 | 0,46723176 |
| HER3_pY1289        | 0,071337 | -0,0242126 | 1,110572 | 0,2784398 | 0,46785463 |
| LRP6_pS1490        | 0,070404 | 0,0860639  | 0,949516 | 0,3524114 | 0,54673438 |
| STAT5-alpha        | 0,070151 | 0,0335454  | 0,374359 | 0,7116303 | 0,84501285 |
| AMPK-a2_pS345      | 0,067148 | -0,0243644 | 1,224603 | 0,2333481 | 0,41784797 |
| STING              | 0,066374 | 0,1183359  | 0,310674 | 0,7588984 | 0,87185075 |
| JNK2               | 0,066189 | 0,0509504  | 0,825831 | 0,4175405 | 0,60311405 |
| c-Abl              | 0,06544  | -0,0534208 | 0,9741   | 0,340328  | 0,53542056 |
| PR                 | 0,064823 | 3,60E-04   | 1,171619 | 0,2535651 | 0,43810296 |
| PTEN               | 0,064072 | 0,0033979  | 0,632158 | 0,5336332 | 0,72025901 |
| G6PD               | 0,056212 | -0,0405422 | 0,41671  | 0,6808257 | 0,83048272 |
| ciAP               | 0,054272 | -0,0154717 | 0,94158  | 0,3563734 | 0,54673438 |

|                 |           |            |          |           |            |
|-----------------|-----------|------------|----------|-----------|------------|
| p27-Kip-1       | 0,053339  | 0,0575981  | 1,127133 | 0,2715221 | 0,46252386 |
| AMPK_alpha      | 0,047113  | 0,106793   | 0,689381 | 0,4976073 | 0,69440119 |
| Atg3            | 0,046415  | -0,159205  | 0,553954 | 0,5850549 | 0,76306001 |
| UBAC1           | 0,046399  | -0,0899037 | 0,658319 | 0,5169899 | 0,70550553 |
| Rad51           | 0,046157  | -0,0949432 | 0,605841 | 0,5506624 | 0,73920439 |
| PKC-alpha       | 0,045954  | 0,1939478  | 0,274739 | 0,7860152 | 0,8806955  |
| eIF4E_pS209     | 0,045378  | -0,0631162 | 0,945002 | 0,3546613 | 0,54673438 |
| NAPSIN-A        | 0,044088  | -0,0234169 | 0,791903 | 0,436658  | 0,62343651 |
| Axl             | 0,042812  | -0,0614344 | 0,507958 | 0,6164094 | 0,77680158 |
| FoxM1           | 0,039265  | -0,0026116 | 0,451163 | 0,656175  | 0,81037612 |
| Creb            | 0,036445  | -0,0330347 | 0,922075 | 0,3662376 | 0,55497351 |
| eEF2            | 0,035399  | -0,0115659 | 0,298964 | 0,767702  | 0,87383596 |
| D-a-Tubulin     | 0,033737  | -0,0371452 | 0,511837 | 0,6137346 | 0,77680158 |
| JNK_pT183_pY185 | 0,031993  | 0,0011722  | 0,588901 | 0,5617736 | 0,74601111 |
| BRD4            | 0,030861  | 0,0060905  | 0,651368 | 0,5213838 | 0,70759235 |
| PDHK1           | 0,025525  | -0,0481166 | 0,536905 | 0,5965844 | 0,77149923 |
| Granzyme-B      | 0,025318  | -0,1310343 | 0,258625 | 0,7982674 | 0,88349877 |
| COG3            | 0,022993  | 0,0297644  | 0,344984 | 0,7332995 | 0,86249986 |
| XPF             | 0,02051   | -0,0346966 | 0,4101   | 0,685598  | 0,83048272 |
| Bak             | 0,01909   | -0,0570662 | 0,23899  | 0,8132694 | 0,88349877 |
| FAK             | 0,019023  | -0,1338132 | 0,196817 | 0,8457312 | 0,90820757 |
| NF-kB-p65_pS536 | 0,018266  | 0,0282627  | 0,192106 | 0,8493763 | 0,90820757 |
| FoxO3a          | 0,017794  | -0,0865903 | 0,384539 | 0,7041769 | 0,84432861 |
| PKC-delta_pS664 | 0,017134  | 0,0161086  | 0,389313 | 0,7006921 | 0,84424857 |
| N-Cadherin      | 0,015604  | -0,0350948 | 0,253208 | 0,8023984 | 0,88349877 |
| Jak2            | 0,011693  | -0,0562983 | 0,156208 | 0,877257  | 0,91592889 |
| PAICS           | 0,009199  | 0,068113   | 0,078792 | 0,9378923 | 0,95993902 |
| IGFBP2          | 0,002766  | 0,0294213  | 0,02627  | 0,9792726 | 0,98726669 |
| EGFR_pY1173     | 0,001998  | 0,0068537  | 0,04823  | 0,9619566 | 0,97571776 |
| HSP70           | -9,36E-04 | 0,127176   | -0,01018 | 0,9919661 | 0,99196612 |
| MDM2_pS166      | -0,00152  | 0,2541291  | -0,02032 | 0,9839646 | 0,98796441 |
| 14-3-3_zeta     | -0,00262  | 0,1376385  | -0,04581 | 0,9638669 | 0,97571776 |
| Shc_pY317       | -0,00873  | 0,0301483  | -0,07547 | 0,9405071 | 0,95993902 |
| Stat3_pY705     | -0,00942  | 0,0686024  | -0,16531 | 0,8701717 | 0,91592889 |
| PI3K-p85        | -0,00967  | 0,0713216  | -0,09531 | 0,924907  | 0,95188347 |
| Aurora-B        | -0,0097   | 0,01747    | -0,1729  | 0,8642672 | 0,91592889 |
| CD134           | -0,00978  | -0,1496793 | -0,1745  | 0,8630245 | 0,91592889 |
| INPP4b          | -0,01017  | -0,0663281 | -0,23944 | 0,8129208 | 0,88349877 |
| PKD1_pS241      | -0,01383  | 0,111296   | -0,15417 | 0,8788467 | 0,91592889 |
| Stathmin        | -0,01555  | 0,0087648  | -0,25689 | 0,7995869 | 0,88349877 |
| TIGAR           | -0,01592  | 0,0086581  | -0,22454 | 0,8243579 | 0,88915461 |
| PRAS40_pT246    | -0,01648  | 0,1035279  | -0,1188  | 0,9064814 | 0,94076011 |
| 04-oct          | -0,01819  | -0,0377163 | -0,28753 | 0,7763327 | 0,87558987 |
| p53             | -0,01975  | -0,041495  | -0,4161  | 0,6812657 | 0,83048272 |
| PAK4            | -0,02093  | -0,0564756 | -0,32651 | 0,7470436 | 0,87181917 |
| Cdc2_pY15       | -0,02183  | -0,0437417 | -0,3196  | 0,7522109 | 0,87185075 |
| Cyclin_D1       | -0,02217  | 0,0211284  | -0,29165 | 0,7732166 | 0,87558987 |
| 14-3-3_beta     | -0,02295  | -0,0765912 | -0,36975 | 0,7150109 | 0,84501285 |
| HER3            | -0,02299  | -0,0146603 | -0,24109 | 0,8116594 | 0,88349877 |
| PREX1           | -0,02378  | 0,0037087  | -0,32485 | 0,748282  | 0,87181917 |

|                       |          |            |          |           |            |
|-----------------------|----------|------------|----------|-----------|------------|
| HES1                  | -0,02381 | 0,040922   | -0,15602 | 0,8774025 | 0,91592889 |
| Wee1_pS642            | -0,02829 | -0,0582548 | -0,47399 | 0,6400616 | 0,79444828 |
| Rab11                 | -0,0347  | 6,85E-04   | -0,57397 | 0,5716632 | 0,75508456 |
| TSC1                  | -0,03475 | 0,084765   | -0,40968 | 0,6859048 | 0,83048272 |
| PDGFR-b               | -0,03484 | 0,2735999  | -0,09909 | 0,9219449 | 0,95188347 |
| ATM_pS1981            | -0,03672 | -0,0181914 | -0,71053 | 0,4846512 | 0,68405048 |
| GCLM                  | -0,03747 | -0,0844496 | -0,89226 | 0,3816656 | 0,56958898 |
| RSK                   | -0,03772 | 0,0447656  | -0,37143 | 0,7137828 | 0,84501285 |
| PEA15                 | -0,03997 | 0,100227   | -0,48655 | 0,6312653 | 0,78748748 |
| Glutamate-D1-2        | -0,04005 | 0,006518   | -0,27214 | 0,7879907 | 0,8806955  |
| Cox2                  | -0,04352 | -0,0368758 | -0,51248 | 0,6132918 | 0,77680158 |
| IGF1R_pY1135_Y1136    | -0,0443  | -0,0292372 | -0,8901  | 0,3828007 | 0,56958898 |
| Src_pY416             | -0,04576 | 0,1671187  | -0,23603 | 0,8155373 | 0,88349877 |
| Wee1                  | -0,04659 | 0,0202702  | -0,30498 | 0,7631726 | 0,872702   |
| LC3A-B                | -0,04699 | -0,0407871 | -0,55111 | 0,5869692 | 0,76306001 |
| FOXO3a_pS318_S321     | -0,04802 | 0,1285134  | -0,86926 | 0,3938533 | 0,58252548 |
| MMP2                  | -0,04894 | -0,0069953 | -1,00785 | 0,3242056 | 0,52219947 |
| Tuberin_pT1462        | -0,04902 | -0,0744172 | -0,60081 | 0,5539491 | 0,73959697 |
| FAK_pY397             | -0,05659 | 0,09564    | -0,49238 | 0,6272014 | 0,78638962 |
| Ets-1                 | -0,05815 | -0,0496285 | -0,96877 | 0,3429218 | 0,53608663 |
| Mcl-1                 | -0,0605  | 0,1007123  | -0,68002 | 0,5034044 | 0,69648258 |
| Beclin                | -0,06576 | -0,0428242 | -1,22691 | 0,2324949 | 0,41784797 |
| p16_INK4a             | -0,06889 | 0,0593482  | -0,55142 | 0,5867618 | 0,76306001 |
| B7-H4                 | -0,07178 | -0,0254777 | -1,36892 | 0,1844887 | 0,3588088  |
| PKM2                  | -0,07668 | 0,0484725  | -0,3143  | 0,7561821 | 0,87185075 |
| p44-42-MAPK           | -0,07773 | 2,21E-05   | -1,07351 | 0,2943824 | 0,48028836 |
| MCT4                  | -0,08051 | 6,78E-04   | -0,52584 | 0,6041236 | 0,77315301 |
| Sifn11                | -0,08247 | -0,0769721 | -1,23643 | 0,2290046 | 0,41784797 |
| Elk1_pS383            | -0,08984 | -0,0110248 | -1,51092 | 0,1446778 | 0,29779513 |
| Tuberin               | -0,09163 | 0,0086241  | -0,90071 | 0,3772518 | 0,56817809 |
| TTF1                  | -0,09406 | -0,0691308 | -1,46065 | 0,1578879 | 0,31703801 |
| PKA-a                 | -0,09458 | 0,0742455  | -1,00492 | 0,3255819 | 0,52219947 |
| Heregulin             | -0,0977  | -0,0312672 | -1,69577 | 0,1036767 | 0,2393285  |
| Gys                   | -0,10409 | -0,0146164 | -0,74778 | 0,4623131 | 0,65627208 |
| Jagged1               | -0,1053  | 0,0592771  | -1,89412 | 0,0710898 | 0,1810225  |
| PLC-gamma2_pY759      | -0,10893 | 0,1434968  | -1,57983 | 0,1280534 | 0,2750364  |
| Caspase-7_cleavedD198 | -0,11207 | 0,0887793  | -0,84964 | 0,4044429 | 0,59110886 |
| HER2_pY1248           | -0,11683 | -0,028885  | -2,84922 | 0,0091814 | 0,06670045 |
| Akt                   | -0,11736 | 0,0629356  | -1,20863 | 0,2393095 | 0,42524774 |
| ERCC5                 | -0,12431 | 0,0282191  | -0,98398 | 0,3355524 | 0,53471894 |
| B-Raf_pS445           | -0,12751 | 0,1013743  | -0,97938 | 0,3377704 | 0,53480307 |
| Rb_pS807_S811         | -0,12758 | 0,0272653  | -0,79409 | 0,4354084 | 0,62343651 |
| MAPK_pT202_Y204       | -0,13335 | -0,0711768 | -1,52798 | 0,140405  | 0,29213552 |
| YAP_pS127             | -0,13727 | 0,1047023  | -0,83629 | 0,4117556 | 0,59825671 |
| p70S6K_pT389          | -0,1463  | -0,0543965 | -2,38207 | 0,0260422 | 0,09851602 |
| eEF2K                 | -0,15185 | -0,0364881 | -1,31039 | 0,203239  | 0,38030336 |
| ER-alpha              | -0,1525  | -0,0489758 | -2,12593 | 0,0446718 | 0,13293895 |
| p21                   | -0,16075 | -0,0093602 | -2,21492 | 0,0371438 | 0,12071739 |
| Atg7                  | -0,16082 | -0,0104942 | -2,30048 | 0,0310121 | 0,107887   |
| P-Met_pY1234_Y1235    | -0,16251 | 0,2264404  | -0,67788 | 0,5047384 | 0,69648258 |

|                   |          |            |          |           |            |
|-------------------|----------|------------|----------|-----------|------------|
| YB1_pS102         | -0,16926 | -0,0186932 | -2,05423 | 0,0517075 | 0,14513365 |
| Paxillin          | -0,16968 | 0,0199992  | -1,82359 | 0,0814802 | 0,20125619 |
| Bad_pS112         | -0,1814  | 0,0648426  | -2,38673 | 0,0257817 | 0,09851602 |
| PEA15_pS116       | -0,18554 | -0,0263777 | -3,62304 | 0,0014589 | 0,03925799 |
| mTOR_pS2448       | -0,18887 | 0,1628695  | -1,45599 | 0,1591608 | 0,31703801 |
| MEK1              | -0,19369 | 0,0244747  | -2,21758 | 0,0369377 | 0,12071739 |
| MSI2              | -0,19481 | -0,0673892 | -1,33243 | 0,1960093 | 0,37530469 |
| ACC_pS79          | -0,19619 | -0,1864269 | -0,69342 | 0,4951176 | 0,69440119 |
| U-Histone-H2B     | -0,20031 | -0,0548845 | -1,34821 | 0,1909613 | 0,36849573 |
| SLC1A5            | -0,20084 | 0,1496055  | -1,55452 | 0,1339673 | 0,28281975 |
| TFAM              | -0,20188 | 0,0319333  | -3,1974  | 0,0040662 | 0,05285995 |
| LDHA              | -0,20267 | 0,0494123  | -2,4196  | 0,0240121 | 0,09566098 |
| HSP27_pS82        | -0,20785 | -0,0132763 | -2,27218 | 0,0329295 | 0,11296646 |
| Mnk1              | -0,20914 | 0,034214   | -2,11814 | 0,0453926 | 0,13347587 |
| b-Actin           | -0,21224 | 0,1361256  | -2,08337 | 0,0487362 | 0,13997493 |
| SHP-2_pY542       | -0,21356 | -0,0152545 | -2,33117 | 0,0290485 | 0,10249987 |
| CD20              | -0,23204 | -0,0273627 | -2,72529 | 0,012184  | 0,06839641 |
| p38_MAPK          | -0,23446 | 0,0700919  | -2,25274 | 0,0343083 | 0,11485535 |
| Cox-IV            | -0,24076 | -0,043776  | -2,5984  | 0,0162049 | 0,08005199 |
| PMS2              | -0,24249 | -0,0387305 | -2,75431 | 0,0114071 | 0,06750283 |
| Cyclin_B1         | -0,25359 | -0,0490261 | -2,75183 | 0,0114717 | 0,06750283 |
| Myosin-IIa_pS1943 | -0,25359 | -0,0490261 | -2,75183 | 0,0114717 | 0,06750283 |
| PLK1              | -0,25359 | -0,0490261 | -2,75183 | 0,0114717 | 0,06750283 |
| TRIM25            | -0,25359 | -0,0490261 | -2,75183 | 0,0114717 | 0,06750283 |
| C-Raf_pS338       | -0,25626 | 0,0632267  | -2,25134 | 0,0344101 | 0,11485535 |
| TFRC              | -0,26456 | -0,0425438 | -3,0103  | 0,0063198 | 0,05822247 |
| Collagen_VI       | -0,26524 | 0,0298493  | -2,68355 | 0,0133892 | 0,07189393 |
| Gys_pS641         | -0,28804 | -0,1177172 | -2,45877 | 0,0220503 | 0,09231214 |
| Rictor_pT1135     | -0,30625 | 0,0756234  | -3,70501 | 0,0011945 | 0,03925799 |
| ULK1_pS757        | -0,30751 | 0,0702128  | -1,62915 | 0,1171546 | 0,25608136 |
| Pdcd4             | -0,31026 | 0,1711035  | -1,17143 | 0,2536386 | 0,43810296 |
| MSH6              | -0,32168 | 0,0879335  | -1,18801 | 0,2471765 | 0,43299717 |
| Sox2              | -0,32872 | 0,2627177  | -1,56069 | 0,1325045 | 0,28214312 |
| p90RSK_pT573      | -0,36455 | 0,1115986  | -2,19125 | 0,0390248 | 0,124035   |
| Chk1_pS296        | -0,38385 | 0,1682085  | -2,75111 | 0,0114903 | 0,06750283 |
| PDK1              | -0,38557 | -0,0217785 | -2,0993  | 0,0471778 | 0,13709323 |
| PKC-b-II_pS660    | -0,42941 | 0,2542991  | -2,81445 | 0,009944  | 0,06750283 |
| ZAP-70            | -0,43507 | 0,188693   | -2,39244 | 0,0254655 | 0,09851602 |
| XBP1              | -0,44064 | 0,0239927  | -2,5454  | 0,0182283 | 0,08405637 |
| Lck               | -0,46571 | 0,0837977  | -2,74122 | 0,0117515 | 0,06750283 |
| IRF-1             | -0,4735  | -0,109279  | -2,49305 | 0,0204565 | 0,08864496 |
| Akt_pT308         | -0,48868 | 0,0607433  | -3,89334 | 7,53E-04  | 0,03098879 |
| p38_pT180_Y182    | -0,49449 | 0,0719863  | -3,32118 | 0,0030264 | 0,04152945 |
| Fibronectin       | -0,58387 | 0,376004   | -1,68088 | 0,1065695 | 0,24149247 |
| S6_pS240_S244     | -0,63893 | 0,1788402  | -3,11939 | 0,0048911 | 0,05733171 |
| GSK-3a-b_pS21_S9  | -0,72138 | 0,1130619  | -4,17276 | 3,78E-04  | 0,02858153 |
| PD-L1             | -0,78775 | 0,2728692  | -2,33819 | 0,0286156 | 0,1024357  |
| Caveolin-1        | -0,79932 | -0,2343902 | -1,90511 | 0,0695805 | 0,17902479 |
| NDRG1_pT346       | -0,88585 | 0,3263951  | -2,42061 | 0,0239595 | 0,09566098 |
| S6_pS235_S236     | -0,89273 | 0,2497408  | -4,00027 | 5,79E-04  | 0,02858153 |

|           |          |           |          |           |            |
|-----------|----------|-----------|----------|-----------|------------|
| Akt_pS473 | -1,03289 | 0,0325736 | -3,35669 | 0,0027793 | 0,04152945 |
| Src_pY527 | -1,07674 | 0,1555428 | -3,45293 | 0,0022043 | 0,04152945 |
| MYH11     | -1,75648 | 0,5057535 | -2,06601 | 0,0504883 | 0,14334031 |









## Subtype A vs. MGT2

| Protein                   | logFC    | AveExpr   | t        | P.Value  | adj.P.Val |
|---------------------------|----------|-----------|----------|----------|-----------|
| P-Met_pY1                 | 3,637657 | -0,512787 | 7,504304 | 1,24E-05 | 4,37E-04  |
| E-Cadherin                | 2,858419 | 2,07281   | 9,734716 | 1,02E-06 | 1,22E-04  |
| Claudin-7                 | 1,849309 | 1,334111  | 7,172082 | 1,88E-05 | 4,90E-04  |
| NDRG1_pT                  | 1,59218  | 0,143565  | 4,439983 | 0,001011 | 0,0078003 |
| 53BP1                     | 1,390249 | 0,675538  | 4,255926 | 0,001372 | 0,0089284 |
| HES1                      | 1,388026 | 0,084085  | 3,031517 | 0,011495 | 0,0359412 |
| Src_pY527                 | 1,271446 | -0,103271 | 5,51767  | 1,86E-04 | 0,0025465 |
| Bim                       | 1,1928   | 0,264333  | 3,052958 | 0,011065 | 0,0350382 |
| RSK                       | 0,955445 | -0,315825 | 7,968723 | 7,06E-06 | 3,26E-04  |
| Src_pY416                 | 0,946306 | -0,174236 | 4,702663 | 6,59E-04 | 0,0060253 |
| 4E-BP1                    | 0,931205 | 0,004343  | 4,626002 | 7,46E-04 | 0,0063553 |
| ARID1A                    | 0,902423 | 0,6773    | 2,706231 | 0,020532 | 0,0533842 |
| CDK1                      | 0,841402 | 0,176039  | 2,594209 | 0,025065 | 0,0612974 |
| Akt_pT308                 | 0,828394 | -0,134122 | 3,761853 | 0,003179 | 0,0153978 |
| p16_INK4a                 | 0,821494 | 0,167892  | 3,066624 | 0,010799 | 0,0350382 |
| VASP                      | 0,732469 | -0,102788 | 3,829014 | 0,002831 | 0,0145695 |
| Gab2                      | 0,711829 | -0,028675 | 2,434552 | 0,033271 | 0,0760914 |
| IR-b                      | 0,692957 | 0,020946  | 3,352691 | 0,006502 | 0,024048  |
| PKC- $\beta$ -II $\alpha$ | 0,687287 | -0,232603 | 5,540261 | 1,79E-04 | 0,0025465 |
| HER3                      | 0,684612 | 0,467884  | 3,693476 | 0,003579 | 0,0164203 |
| Rad50                     | 0,638681 | 0,455258  | 3,340458 | 0,006644 | 0,0241119 |
| PDK1_pS24                 | 0,62223  | 0,034216  | 8,196864 | 5,40E-06 | 3,26E-04  |
| Akt_pS473                 | 0,603119 | -0,184994 | 2,678357 | 0,021578 | 0,0549461 |
| c-Jun_pS73                | 0,585643 | 0,276401  | 4,455335 | 9,85E-04 | 0,0078003 |
| 4E-BP1_pS1                | 0,535982 | 0,364639  | 3,84237  | 0,002767 | 0,0145413 |
| ACC1                      | 0,510477 | 0,238597  | 2,540506 | 0,027575 | 0,0648665 |
| HER2_pY11                 | 0,504194 | 0,063467  | 2,666076 | 0,022055 | 0,0555883 |
| FASN                      | 0,501761 | -7,63E-04 | 4,079585 | 0,001845 | 0,0109818 |
| C-Raf_pS33                | 0,500747 | 0,080728  | 3,308351 | 0,007032 | 0,0248118 |
| PAICS                     | 0,500277 | 0,310122  | 2,043257 | 0,065897 | 0,136744  |
| p38_pT180                 | 0,481667 | 0,109864  | 6,322686 | 5,82E-05 | 0,0010269 |
| GCN5L2                    | 0,47722  | 0,315373  | 3,78688  | 0,003045 | 0,0153479 |
| STING                     | 0,468437 | 0,114471  | 0,704499 | 0,495859 | 0,612386  |
| PARP                      | 0,461149 | 0,302319  | 3,968254 | 0,00223  | 0,0122401 |
| eIF4E                     | 0,451018 | -0,007555 | 4,968384 | 4,31E-04 | 0,004632  |
| PDK1                      | 0,445608 | -0,066556 | 7,13043  | 1,98E-05 | 4,90E-04  |
| Caspase-3                 | 0,438372 | 0,152172  | 5,332925 | 2,45E-04 | 0,0031884 |
| 14-3-3_zeta               | 0,423332 | -0,017049 | 3,691773 | 0,00359  | 0,0164203 |
| Paxillin                  | 0,41394  | -0,022313 | 6,874556 | 2,76E-05 | 6,21E-04  |
| FAK                       | 0,407971 | -0,029242 | 5,123623 | 3,38E-04 | 0,004157  |
| Histone-H3                | 0,385838 | 0,054322  | 2,196682 | 0,050528 | 0,1114322 |
| p90RSK_pT                 | 0,378022 | 0,017034  | 3,531836 | 0,004745 | 0,01947   |
| Bax                       | 0,368331 | -0,020412 | 0,826717 | 0,426078 | 0,5396982 |
| Bcl-xL                    | 0,364332 | 0,192799  | 2,719429 | 0,020055 | 0,0526977 |
| Jagged1                   | 0,35794  | 0,087936  | 1,749995 | 0,1081   | 0,1964232 |
| c-Myc                     | 0,357068 | 0,281863  | 3,662234 | 0,003779 | 0,016971  |
| Shc_pY317                 | 0,338664 | -0,203854 | 3,023125 | 0,011668 | 0,0360265 |
| Caveolin-1                | 0,334515 | -0,106836 | 0,950612 | 0,362349 | 0,4775705 |
| RBM15                     | 0,334174 | 0,521032  | 0,624377 | 0,545193 | 0,6474162 |
| PRAS40_pT                 | 0,323953 | -0,104174 | 1,103932 | 0,293333 | 0,4188231 |
| WIPI1                     | 0,304193 | 0,243406  | 1,358826 | 0,201582 | 0,317138  |
| TUFM                      | 0,300465 | 0,120711  | 3,217371 | 0,008261 | 0,0283398 |
| beta-Catenin              | 0,289844 | 0,309686  | 1,608168 | 0,136277 | 0,2404317 |
| ER-alpha_p                | 0,286177 | 0,181252  | 4,07261  | 0,001867 | 0,0109818 |
| c-Kit                     | 0,279571 | 0,222288  | 4,388641 | 0,0011   | 0,0079908 |
| HSP70                     | 0,27151  | 0,071262  | 3,377812 | 0,00622  | 0,0240053 |
| DJ-1                      | 0,265733 | 0,139229  | 2,994441 | 0,01228  | 0,0369909 |
| RPA32_pS4                 | 0,261734 | -0,005264 | 2,862701 | 0,015532 | 0,044098  |
| PLC-gamma2                | 0,260835 | -0,021192 | 3,350843 | 0,006523 | 0,024048  |
| ACC_pS79                  | 0,251971 | 0,126956  | 0,670382 | 0,516529 | 0,6254047 |
| MSH6                      | 0,246726 | 0,140975  | 1,52971  | 0,154501 | 0,2651031 |
| b-Actin                   | 0,245096 | 0,147224  | 1,529492 | 0,154554 | 0,2651031 |
| AMPK_alpha1               | 0,241763 | -0,133322 | 2,038531 | 0,066434 | 0,136744  |
| Bid                       | 0,241507 | 0,180387  | 1,811547 | 0,097594 | 0,1824368 |
| eIF4G                     | 0,239594 | 0,049167  | 3,538797 | 0,004687 | 0,01947   |
| Bad_pS112                 | 0,238065 | -0,152378 | 2,575245 | 0,025924 | 0,0627778 |

## Subtype B vs. MGT2

| Protein                   | logFC    | AveExpr   | t        | P.Value  | adj.P.Val |
|---------------------------|----------|-----------|----------|----------|-----------|
| P-Met_pY1                 | 4,429137 | -0,83157  | 57,94388 | 2,68E-10 | 6,62E-08  |
| HES1                      | 2,033252 | 0,168379  | 33,24106 | 1,09E-08 | 9,01E-07  |
| Notch1                    | 1,710942 | 0,731063  | 31,59293 | 1,54E-08 | 9,49E-07  |
| Fibronectin               | 1,599821 | 1,178052  | 9,284537 | 4,58E-05 | 4,52E-04  |
| IGF1Rb                    | 1,571705 | 0,517034  | 24,26581 | 8,87E-08 | 3,13E-06  |
| MCT4                      | 1,567953 | 0,191969  | 17,06514 | 9,06E-07 | 1,97E-05  |
| RSK                       | 1,545585 | -0,170202 | 29,36662 | 2,50E-08 | 1,23E-06  |
| Akt_pT308                 | 1,195723 | -0,094465 | 13,88509 | 3,49E-06 | 5,74E-05  |
| Akt_pS473                 | 1,162458 | 0,01902   | 12,2847  | 7,70E-06 | 1,06E-04  |
| NDRG1_pT                  | 1,109908 | -0,493183 | 19,43433 | 3,85E-07 | 1,06E-05  |
| Src_pY416                 | 1,004716 | -0,345657 | 16,91783 | 9,59E-07 | 1,97E-05  |
| PKA-a                     | 0,945893 | 0,458861  | 16,1482  | 1,30E-06 | 2,47E-05  |
| IR-b                      | 0,875025 | -0,021004 | 6,686059 | 3,40E-04 | 0,0020021 |
| Bim                       | 0,834885 | -0,210663 | 10,30311 | 2,37E-05 | 2,93E-04  |
| STING                     | 0,812935 | 0,218965  | 8,125268 | 1,05E-04 | 9,25E-04  |
| Src_pY527                 | 0,798604 | -0,664382 | 7,787181 | 1,36E-04 | 0,0010837 |
| CDK1                      | 0,759937 | -0,056419 | 12,81882 | 5,85E-06 | 9,03E-05  |
| LRP6_pS14                 | 0,702505 | 0,268665  | 11,88844 | 9,51E-06 | 1,24E-04  |
| PKC- $\beta$ -II $\alpha$ | 0,693778 | -0,378662 | 9,59041  | 3,73E-05 | 4,39E-04  |
| ACC_pS79                  | 0,693151 | 0,336689  | 7,578502 | 1,60E-04 | 0,0012387 |
| AMPK_pT1                  | 0,684977 | 0,918582  | 4,163988 | 0,004651 | 0,0149183 |
| SLC1A5                    | 0,662634 | 0,316106  | 7,351803 | 1,93E-04 | 0,0013138 |
| Caveolin-1                | 0,625031 | -0,005511 | 6,850821 | 2,95E-04 | 0,0018659 |
| Shc_pY317                 | 0,579833 | -0,133043 | 5,338815 | 0,001242 | 0,0061373 |
| HER2_pY11                 | 0,571485 | -0,006164 | 8,016517 | 1,14E-04 | 9,50E-04  |
| YAP_pS127                 | 0,550479 | 0,007843  | 9,450377 | 4,10E-05 | 4,52E-04  |
| ERCC5                     | 0,506844 | -0,006689 | 4,430638 | 0,003387 | 0,0124122 |
| ACC1                      | 0,498117 | 0,119805  | 6,114026 | 5,75E-04 | 0,0032184 |
| IGF1R_pY1                 | 0,494727 | 0,152044  | 7,286968 | 2,04E-04 | 0,0013228 |
| PRAS40_pT                 | 0,461013 | -0,092619 | 7,99944  | 1,15E-04 | 9,50E-04  |
| Tuberin                   | 0,455819 | 0,202501  | 5,167735 | 0,001488 | 0,0068051 |
| FASN                      | 0,452651 | -0,139704 | 5,22551  | 0,001399 | 0,0065509 |
| MAPK_pT2                  | 0,433972 | -0,028119 | 5,953306 | 6,71E-04 | 0,0035067 |
| Rb_pS807                  | 0,424155 | 0,468813  | 7,429753 | 1,81E-04 | 0,0013065 |
| Paxillin                  | 0,420426 | -0,108736 | 6,765916 | 0,000317 | 0,0019426 |
| 4E-BP1                    | 0,409332 | -0,511953 | 6,093394 | 5,86E-04 | 0,0032184 |
| Bad_pS112                 | 0,388397 | -0,114121 | 3,819178 | 0,007119 | 0,0204478 |
| AMPK_alpha1               | 0,379505 | -0,103425 | 3,568891 | 0,009808 | 0,0259636 |
| PLC-gamma2                | 0,376092 | -0,008946 | 4,423101 | 0,003417 | 0,0124122 |
| GSK-3a-b_alpha            | 0,371556 | 0,012234  | 5,765962 | 8,05E-04 | 0,0040593 |
| Pdcd4                     | 0,358724 | 0,30753   | 4,945374 | 0,001892 | 0,0080555 |
| p21                       | 0,354248 | -0,093737 | 6,182004 | 5,39E-04 | 0,0030976 |
| COG3                      | 0,347162 | 0,050711  | 5,221219 | 0,001406 | 0,0065509 |
| 14-3-3_zeta               | 0,340484 | -0,159122 | 5,936645 | 6,81E-04 | 0,0035067 |
| p90RSK_pT                 | 0,324632 | -0,097478 | 3,609566 | 0,009304 | 0,0255765 |
| PDK1_pS24                 | 0,321764 | -0,281823 | 4,349438 | 0,003726 | 0,0129631 |
| WIPI1                     | 0,304937 | 0,177482  | 4,349768 | 0,003725 | 0,0129631 |
| FAK                       | 0,297001 | -0,184835 | 5,008786 | 0,001765 | 0,007649  |
| Bax                       | 0,294233 | -0,145235 | 5,048647 | 0,001691 | 0,0074564 |
| Caspase-7                 | 0,293288 | -0,035883 | 2,760869 | 0,029328 | 0,0619152 |
| WIPI2                     | 0,265893 | 0,088879  | 1,838137 | 0,110552 | 0,1870289 |
| PDK1                      | 0,263278 | -0,273178 | 3,876257 | 0,006627 | 0,0197203 |
| GATA6                     | 0,252854 | -0,001738 | 3,563194 | 0,009881 | 0,0259636 |
| eIF4E                     | 0,251234 | -0,225829 | 4,329857 | 0,003814 | 0,0130825 |
| Caspase-3                 | 0,249663 | -0,056699 | 3,822671 | 0,007088 | 0,0204478 |
| UB1_pS102                 | 0,247645 | -0,039208 | 3,393642 | 0,012343 | 0,030293  |
| UBAC1                     | 0,237905 | -0,064641 | 4,115195 | 0,004934 | 0,0154269 |
| p38_pT180                 | 0,217278 | -0,15386  | 2,938324 | 0,022889 | 0,0504783 |
| Myt1                      | 0,209453 | -0,049406 | 3,66189  | 0,008698 | 0,024413  |
| XRCC1                     | 0,207335 | 0,165378  | 2,451464 | 0,045538 | 0,086523  |
| Bid                       | 0,205877 | 0,106317  | 2,356773 | 0,052183 | 0,0969118 |
| mTOR                      | 0,205357 | 0,006248  | 3,857133 | 0,006787 | 0,0199584 |
| Rictor_pT1                | 0,204619 | 0,028295  | 3,573809 | 0,009746 | 0,0259636 |
| Histone-H3                | 0,203684 | -0,139153 | 1,838476 | 0,110497 | 0,1870289 |
| Chk2_pT68                 | 0,203435 | 0,012562  | 3,233    | 0,015298 | 0,0363328 |
| HER3_pY11                 | 0,191942 | -0,098544 | 3,108271 | 0,018117 | 0,0414349 |

|            |          |           |          |          |           |
|------------|----------|-----------|----------|----------|-----------|
| p53        | 0,234861 | -0,028158 | 1,717783 | 0,113997 | 0,2055273 |
| Elk1_pS38: | 0,223288 | -0,027692 | 3,153167 | 0,009258 | 0,0304905 |
| EGFR       | 0,218885 | -0,060514 | 3,053962 | 0,011045 | 0,0350382 |
| ERCC5      | 0,21579  | -0,13424  | 2,001351 | 0,070806 | 0,1432118 |
| SLC1A5     | 0,214218 | 0,093795  | 0,925357 | 0,37476  | 0,4872195 |
| TSC1       | 0,209308 | -0,236983 | 1,440225 | 0,177827 | 0,2889694 |
| Smad3      | 0,208068 | 0,189307  | 3,351871 | 0,006511 | 0,024048  |
| Lck        | 0,206677 | 0,110104  | 1,586843 | 0,141034 | 0,2470589 |
| Merlin     | 0,203843 | 0,100168  | 1,149809 | 0,27476  | 0,4057239 |
| HER3_pY1:  | 0,203492 | -0,047216 | 2,946901 | 0,013366 | 0,0393039 |
| Bak        | 0,193494 | -0,012915 | 1,976923 | 0,073823 | 0,1461908 |
| Myt1       | 0,193394 | -0,016846 | 2,059608 | 0,06407  | 0,1341125 |
| NAPSIN-A   | 0,193247 | -0,08934  | 2,482779 | 0,030548 | 0,0705178 |
| UBAC1      | 0,189955 | -0,051966 | 1,969361 | 0,074781 | 0,1465416 |
| Connexin-4 | 0,18699  | 0,477773  | 0,749889 | 0,469156 | 0,5852598 |
| EGFR_pY11  | 0,182097 | -0,013826 | 3,197102 | 0,008563 | 0,028975  |
| Aurora-B   | 0,17813  | -0,041328 | 1,975649 | 0,073983 | 0,1461908 |
| PAK4       | 0,174688 | 0,016478  | 1,855111 | 0,09073  | 0,1723861 |
| GSK-3a-b_f | 0,174242 | -0,068138 | 1,138371 | 0,430172 | 0,5421047 |
| MAPK_pT2   | 0,173967 | -0,146165 | 0,912501 | 0,381192 | 0,4929548 |
| ATR_pS42E  | 0,173213 | 0,029853  | 2,740563 | 0,019313 | 0,0515209 |
| Notch3     | 0,172453 | 0,041833  | 2,738095 | 0,019399 | 0,0515209 |
| VEGFR-2    | 0,161657 | -0,036295 | 0,967953 | 0,353999 | 0,4751501 |
| MEK1_pS2   | 0,160906 | 0,032162  | 2,643838 | 0,022946 | 0,0572498 |
| b-Catenin_ | 0,158045 | 0,041754  | 1,869614 | 0,088544 | 0,1695382 |
| Notch1     | 0,156847 | -0,167172 | 0,700098 | 0,498497 | 0,6125812 |
| Caspase-7_ | 0,155075 | -0,084976 | 1,138371 | 0,279303 | 0,4057239 |
| TAZ        | 0,151172 | 0,185789  | 1,807623 | 0,098235 | 0,1824368 |
| IGF1R_pY1  | 0,148883 | -0,022979 | 2,229583 | 0,047709 | 0,106625  |
| Chk2_pT68  | 0,14549  | 0,009538  | 1,474399 | 0,168586 | 0,2794674 |
| Rictor     | 0,143098 | 0,019462  | 1,386335 | 0,193273 | 0,3079892 |
| Tuberin    | 0,139159 | 0,042867  | 1,276209 | 0,228333 | 0,3481377 |
| Cyclin_D1  | 0,129665 | 0,001313  | 1,650296 | 0,127294 | 0,2261986 |
| TIGAR      | 0,129574 | 0,043638  | 1,09703  | 0,296209 | 0,4188231 |
| YB1_pS102  | 0,12957  | -0,081783 | 1,285143 | 0,225307 | 0,3461398 |
| Glutamate_ | 0,127577 | -0,021805 | 1,417977 | 0,184073 | 0,2971628 |
| IRS1       | 0,116085 | 0,34378   | 0,316469 | 0,757609 | 0,8075234 |
| AMPK-a2_f  | 0,11558  | -0,085886 | 1,095769 | 0,296737 | 0,4188231 |
| PEA15      | 0,11237  | 0,139538  | 0,833019 | 0,422664 | 0,5396982 |
| LC3A-B     | 0,109187 | -0,058193 | 1,065715 | 0,309528 | 0,4319408 |
| PEA15_pS1  | 0,101697 | -0,008363 | 0,556717 | 0,588938 | 0,686168  |
| p27_pT198  | 0,101498 | 0,106837  | 1,053753 | 0,314734 | 0,4355815 |
| eEF2K      | 0,100409 | 0,15178   | 0,451722 | 0,660302 | 0,7379841 |
| FOXO3a_p:  | 0,094894 | -0,075844 | 1,823714 | 0,095631 | 0,1803112 |
| JNK_pT183  | 0,093291 | 0,025704  | 0,959186 | 0,358203 | 0,4756777 |
| p27-Kip-1  | 0,090625 | -0,052819 | 1,913175 | 0,082268 | 0,158752  |
| Akt        | 0,089004 | -0,093046 | 0,474568 | 0,644435 | 0,7235247 |
| WIP1       | 0,076508 | -0,008059 | 0,424551 | 0,6794   | 0,7491602 |
| YAP_pS127  | 0,074437 | -0,261542 | 0,418235 | 0,683875 | 0,7507427 |
| DM-K9-His: | 0,070306 | 0,013084  | 1,135106 | 0,28061  | 0,4057239 |
| Stathmin   | 0,063385 | -0,09865  | 0,67448  | 0,514019 | 0,6254047 |
| Mnk1       | 0,061391 | 0,099689  | 0,508216 | 0,621402 | 0,7124215 |
| p38_MAPK   | 0,056059 | 0,026224  | 0,387848 | 0,705576 | 0,7685687 |
| PKM2       | 0,046362 | -0,106769 | 0,241959 | 0,813292 | 0,8548214 |
| mTOR       | 0,045241 | -0,079951 | 0,426884 | 0,677751 | 0,7491602 |
| Wee1_pS6   | 0,045056 | 0,207071  | 0,643198 | 0,533358 | 0,6395114 |
| PREX1      | 0,044776 | 0,175763  | 0,55076  | 0,592877 | 0,6875148 |
| IGFRb      | 0,044164 | -0,389855 | 0,427417 | 0,677375 | 0,7491602 |
| MDM2_ps:   | 0,03625  | -0,166058 | 0,330196 | 0,747494 | 0,8062492 |
| p21        | 0,029076 | -0,282497 | 0,317732 | 0,756676 | 0,8075234 |
| clAP       | 0,025597 | -0,050772 | 0,50585  | 0,623008 | 0,7124215 |
| Tyro3      | 0,016713 | 0,013275  | 0,306917 | 0,764675 | 0,8075234 |
| XRCC1      | 0,014632 | 0,052949  | 0,148387 | 0,884739 | 0,9143541 |
| U-Histone- | 0,010909 | -0,015202 | 0,117134 | 0,908879 | 0,9315062 |
| MCT4       | 0,004452 | -0,74516  | 0,017185 | 0,986599 | 0,992555  |
| Rictor_pT1 | 0,001608 | -0,09316  | 0,01033  | 0,991944 | 0,992555  |
| Rad51      | -0,00124 | 0,207918  | -0,00955 | 0,992555 | 0,992555  |
| Rb_pS807_  | -0,00913 | 0,206846  | -0,03008 | 0,976542 | 0,9885487 |
| LRP6_pS14  | -0,01096 | -0,161801 | -0,1418  | 0,889819 | 0,915772  |

|             |           |           |          |          |           |
|-------------|-----------|-----------|----------|----------|-----------|
| PKM2        | 0,189979  | -0,030715 | 2,921563 | 0,023427 | 0,0512087 |
| RIP         | 0,187817  | 0,216472  | 1,363352 | 0,216825 | 0,3113704 |
| Gys         | 0,185007  | 0,229644  | 3,15264  | 0,017055 | 0,0393704 |
| PAICS       | 0,18402   | 0,011217  | 1,71356  | 0,132265 | 0,21214   |
| Bak         | 0,18062   | -0,062856 | 1,652588 | 0,144328 | 0,2270633 |
| Elk1_pS38:  | 0,175146  | -0,105295 | 2,191381 | 0,066274 | 0,1186205 |
| STAT5-alpha | 0,173442  | 0,775827  | 3,072549 | 0,019024 | 0,0431092 |
| Stat3       | 0,173035  | 0,403483  | 3,030139 | 0,020164 | 0,0452767 |
| Mcl-1       | 0,169579  | 0,479658  | 2,567735 | 0,038559 | 0,0767051 |
| FOXO3a_p:   | 0,15269   | -0,06187  | 2,656238 | 0,033999 | 0,0694039 |
| Stat3_pY7C  | 0,15226   | 0,240467  | 2,857044 | 0,025629 | 0,0550477 |
| EGFR_pY11   | 0,150863  | -0,072296 | 2,273822 | 0,058821 | 0,1068297 |
| S6_pS240_   | 0,1319    | 0,442304  | 1,231873 | 0,259488 | 0,3580641 |
| ATR_pS42E   | 0,130777  | -0,033401 | 1,752501 | 0,125071 | 0,2059507 |
| Akt         | 0,130338  | -0,087664 | 2,386733 | 0,049979 | 0,0935216 |
| p53         | 0,127715  | -0,143689 | 1,597836 | 0,156039 | 0,2423994 |
| Aurora-B    | 0,120157  | -0,114976 | 1,811734 | 0,114845 | 0,1916666 |
| CD20        | 0,11635   | 0,092588  | 1,985751 | 0,089289 | 0,1553125 |
| Stathmin    | 0,115549  | -0,081181 | 1,278994 | 0,129368 | 0,2102227 |
| mTOR_pS2    | 0,114578  | 0,01004   | 1,580779 | 0,159865 | 0,2467916 |
| Hexokinase  | 0,094923  | 0,04622   | 1,717849 | 0,131454 | 0,21214   |
| SDHA        | 0,093427  | 0,182789  | 1,170325 | 0,281823 | 0,3762714 |
| Lck         | 0,08686   | -0,00688  | 1,189175 | 0,274816 | 0,370927  |
| U-Histone-  | 0,082333  | 0,025272  | 1,155404 | 0,287475 | 0,3817538 |
| LC3A-B      | 0,082153  | -0,098236 | 1,329239 | 0,227257 | 0,3226006 |
| MEK1        | 0,069103  | 0,359646  | 0,978753 | 0,361722 | 0,4600599 |
| Tyro3       | 0,065279  | 0,038768  | 1,218976 | 0,264039 | 0,3603457 |
| p44-42-MA   | 0,06256   | 0,020878  | 1,091774 | 0,312642 | 0,4085853 |
| Wee1        | 0,057608  | 0,318637  | 0,960062 | 0,370391 | 0,4667683 |
| S6_pS235_   | 0,051162  | 0,42135   | 0,330397 | 0,751193 | 0,8246435 |
| NAPSIN-A    | 0,049716  | -0,217621 | 0,466318 | 0,655773 | 0,7430087 |
| MERIT40_f   | 0,048588  | 0,087179  | 0,412583 | 0,692798 | 0,7813746 |
| TSC1        | 0,040575  | -0,38389  | 0,717029 | 0,497592 | 0,5995378 |
| c-Abl       | 0,040335  | 0,046742  | 0,63463  | 0,546726 | 0,6523741 |
| Collagen_v  | 0,040136  | 0,187521  | 0,356881 | 0,732159 | 0,8120777 |
| clAP        | 0,037947  | -0,048946 | 0,566057 | 0,589807 | 0,6904381 |
| TUFM        | 0,037279  | -0,102757 | 0,355465 | 0,733171 | 0,8120777 |
| MEK1_pS2    | 0,036383  | -0,077658 | 0,55098  | 0,599535 | 0,6985145 |
| b-Catenin_  | 0,02861   | -0,070389 | 0,263338 | 0,800207 | 0,8519445 |
| DJ-1        | 0,028009  | -0,061384 | 0,382096 | 0,714224 | 0,8018785 |
| ER-alpha_f  | 0,022935  | -0,039132 | 0,296226 | 0,776031 | 0,8336778 |
| Gys_pS641   | 0,021184  | 0,030585  | 0,369732 | 0,722994 | 0,8080525 |
| c-Kit       | 0,020027  | 0,005564  | 0,295583 | 0,776501 | 0,8336778 |
| PARP        | 0,017185  | -0,064674 | 0,149695 | 0,885413 | 0,904904  |
| YAP         | 0,013803  | -0,006171 | 0,246721 | 0,812515 | 0,8576546 |
| PR          | 0,010656  | 0,24656   | 0,198898 | 0,848245 | 0,8766638 |
| elF4G       | -2,47E-04 | -0,147012 | -0,00395 | 0,99696  | 0,99696   |
| Bcl-xL      | -0,00368  | -0,107499 | -0,06513 | 0,949972 | 0,9577273 |
| MDM2_pS:    | -0,00591  | -0,199264 | -0,05304 | 0,959248 | 0,9631474 |
| PDHK1       | -0,00776  | 0,058109  | -0,12715 | 0,902555 | 0,9174122 |
| TIGAR       | -0,00856  | -0,067512 | -0,14815 | 0,886586 | 0,904904  |
| DM-K9-His:  | -0,0101   | -0,050499 | -0,15294 | 0,882953 | 0,904904  |
| Mnk1        | -0,01085  | 0,042951  | -0,11676 | 0,910477 | 0,9216714 |
| p38_MAPK    | -0,01454  | -0,028369 | -0,20919 | 0,840521 | 0,8723052 |
| XPF         | -0,01589  | 0,009206  | -0,2963  | 0,775978 | 0,8336778 |
| PAK1        | -0,01791  | -0,004488 | -0,30113 | 0,77245  | 0,8336778 |
| JNK_pT183   | -0,01948  | -0,062312 | -0,34436 | 0,74113  | 0,8172287 |
| p27_pT198   | -0,02014  | 0,01171   | -0,25504 | 0,806344 | 0,8547941 |
| FoxM1       | -0,02167  | 0,036726  | -0,24184 | 0,816141 | 0,8578158 |
| 4E-BP1_pS:  | -0,02178  | -0,086957 | -0,2319  | 0,823542 | 0,8619269 |
| LDHA        | -0,02473  | 0,306928  | -0,22367 | 0,829685 | 0,8646926 |
| TFAM        | -0,02557  | 0,215198  | -0,29125 | 0,779674 | 0,8336778 |
| Notch3      | -0,02558  | -0,114612 | -0,32481 | 0,755233 | 0,8254095 |
| Atg7        | -0,02732  | -0,058942 | -0,499   | 0,633749 | 0,734911  |
| G6PD        | -0,02819  | 0,018532  | -0,47475 | 0,650055 | 0,7430087 |
| Rab25       | -0,02846  | -0,058297 | -0,46709 | 0,655251 | 0,7430087 |
| C-raf_pS3:  | -0,0308   | -0,347453 | -0,4849  | 0,643199 | 0,7423844 |
| B7-H4       | -0,03884  | 0,068568  | -0,70454 | 0,504849 | 0,6053288 |
| PI3K-p110-  | -0,04162  | 0,080436  | -0,76123 | 0,472466 | 0,5748723 |



|             |          |           |          |          |           |
|-------------|----------|-----------|----------|----------|-----------|
| PAK1        | -0,0136  | -0,004866 | -0,04448 | 0,965322 | 0,9812126 |
| Rab11       | -0,01981 | -0,035245 | -0,1721  | 0,866507 | 0,9030688 |
| P-Cadherin  | -0,02388 | 0,057863  | -0,30645 | 0,765022 | 0,8075234 |
| GCLM        | -0,02593 | 0,020193  | -0,50009 | 0,626924 | 0,713596  |
| p70-S6K1    | -0,02627 | 0,111673  | -0,21259 | 0,835559 | 0,8745042 |
| MMP2        | -0,02702 | 0,049248  | -0,55704 | 0,588724 | 0,686168  |
| YAP         | -0,02796 | -0,037328 | -0,37465 | 0,715085 | 0,7746759 |
| JNK2        | -0,03743 | 0,004678  | -0,38679 | 0,706336 | 0,7685687 |
| Atg7        | -0,04046 | -0,075657 | -0,30686 | 0,764719 | 0,8075234 |
| Chk1_pS29   | -0,04384 | -0,021965 | -0,73728 | 0,476481 | 0,5914106 |
| Hexokinase  | -0,0487  | -0,050583 | -0,80062 | 0,440407 | 0,521855  |
| Ets-1       | -0,04892 | 0,060662  | -0,97684 | 0,349774 | 0,4746931 |
| Creb        | -0,05367 | 0,035296  | -1,02208 | 0,328831 | 0,4487363 |
| Cox2        | -0,05874 | 0,957895  | -0,08284 | 0,935477 | 0,9548053 |
| PKA-a       | -0,05969 | -0,157512 | -0,4941  | 0,631013 | 0,7149549 |
| FAK_pY397   | -0,06338 | 0,253015  | -0,15167 | 0,882213 | 0,9143541 |
| PMS2        | -0,07143 | 0,147057  | -0,59999 | 0,560745 | 0,6626989 |
| N-Cadherin  | -0,07154 | -0,080749 | -0,47941 | 0,641096 | 0,7230625 |
| Smad1       | -0,07287 | 0,032616  | -0,65233 | 0,527671 | 0,6357796 |
| CD20        | -0,08026 | -0,042893 | -1,05163 | 0,315664 | 0,4355815 |
| NF-kB-p65   | -0,08295 | 0,032383  | -0,56537 | 0,583242 | 0,6860037 |
| mTOR_pS2    | -0,08552 | -0,128678 | -0,52021 | 0,61329  | 0,7078633 |
| Sfhn11      | -0,08637 | -0,078558 | -0,96595 | 0,354957 | 0,4751501 |
| GATA6       | -0,08797 | -0,225422 | -0,96402 | 0,355882 | 0,4751501 |
| Rab25       | -0,08902 | -0,114058 | -1,14255 | 0,277638 | 0,4057239 |
| Jak2        | -0,09052 | -0,008305 | -1,16934 | 0,267136 | 0,3974848 |
| IRF-1       | -0,09924 | 0,056109  | -1,47526 | 0,168358 | 0,2794674 |
| D-a-Tubulin | -0,10018 | -0,031204 | -1,40656 | 0,187348 | 0,3004864 |
| eEF2        | -0,10324 | 0,116836  | -0,63082 | 0,541127 | 0,6456925 |
| Tuberin_p1  | -0,10398 | -0,006469 | -1,31947 | 0,213982 | 0,3324126 |
| ATM_pS19    | -0,10456 | -0,039159 | -2,17966 | 0,052048 | 0,1137689 |
| Raptor      | -0,10909 | 0,047014  | -1,25124 | 0,236964 | 0,3590808 |
| c-Abl       | -0,10954 | -0,067083 | -1,96493 | 0,075347 | 0,1465416 |
| ZAP-70      | -0,10962 | 0,048859  | -1,13442 | 0,280886 | 0,4057239 |
| Cdc2_pY15   | -0,11392 | 0,128145  | -1,08775 | 0,300112 | 0,4211795 |
| MERIT40_r   | -0,11948 | -0,039726 | -1,17769 | 0,263926 | 0,3950895 |
| OCT4        | -0,12349 | 0,032758  | -2,62763 | 0,023618 | 0,0583365 |
| eIF4E_pS2C  | -0,12707 | 0,046931  | -2,2271  | 0,047917 | 0,106625  |
| XPF         | -0,13373 | -0,090681 | -2,36272 | 0,037769 | 0,0855867 |
| COG3        | -0,13669 | -0,269422 | -0,82924 | 0,424707 | 0,5396982 |
| TFAM        | -0,13704 | 0,118415  | -0,8328  | 0,422781 | 0,5396982 |
| cdc25C      | -0,13826 | 0,142199  | -0,92531 | 0,374784 | 0,4872195 |
| BRD4        | -0,1446  | -0,06714  | -2,08815 | 0,060995 | 0,1289559 |
| PI3K-p110   | -0,14952 | -0,016923 | -3,41611 | 0,005814 | 0,0231627 |
| FoxM1       | -0,15471 | -0,076849 | -1,74971 | 0,108152 | 0,1964232 |
| C-Raf       | -0,15709 | -0,011436 | -1,46843 | 0,170171 | 0,2802145 |
| PKC-delta   | -0,15902 | -0,050856 | -3,52424 | 0,004808 | 0,01947   |
| 14-3-3_beta | -0,17231 | -0,020808 | -2,84679 | 0,01598  | 0,0448519 |
| B7-H4       | -0,17286 | -0,049555 | -2,91179 | 0,01423  | 0,0413515 |
| RIP         | -0,17423 | -0,038769 | -0,94825 | 0,363495 | 0,4775705 |
| MEK1        | -0,1799  | 0,170994  | -1,37431 | 0,196868 | 0,3117081 |
| DUSP4       | -0,18444 | 0,128881  | -1,47938 | 0,167273 | 0,2794674 |
| INPP4b      | -0,19089 | -0,024663 | -3,62402 | 0,004039 | 0,0178147 |
| p44-42-MA   | -0,19152 | -0,17336  | -1,28421 | 0,225621 | 0,3461398 |
| SHP-2_pY5   | -0,19254 | -0,09438  | -2,0873  | 0,061084 | 0,1289559 |
| CD4         | -0,20334 | 0,03085   | -2,55706 | 0,026776 | 0,063593  |
| CD134       | -0,20466 | 0,02215   | -2,95002 | 0,013292 | 0,0393039 |
| MYH11       | -0,20505 | -0,080303 | -1,09766 | 0,295948 | 0,4188231 |
| DM-Histon   | -0,21518 | 0,048536  | -2,76747 | 0,018408 | 0,0505211 |
| ER-alpha    | -0,21616 | 0,056836  | -3,38394 | 0,006153 | 0,0240053 |
| MIF         | -0,21648 | -0,062072 | -2,56651 | 0,02633  | 0,0631408 |
| G6PD        | -0,21778 | -0,142741 | -1,51267 | 0,158728 | 0,2703856 |
| A-Raf       | -0,21779 | 0,051285  | -1,71144 | 0,115192 | 0,2061771 |
| Wee1        | -0,21884 | 0,105018  | -1,02382 | 0,328047 | 0,4487363 |
| PD-L1       | -0,21999 | -0,036177 | -4,263   | 0,001355 | 0,0089284 |
| IGFBP2      | -0,2265  | -0,005399 | -1,78229 | 0,102466 | 0,1888741 |
| Beclin      | -0,23185 | 0,016681  | -3,53411 | 0,004726 | 0,01947   |
| FoxO3a      | -0,23736 | -6,74E-04 | -2,86391 | 0,015499 | 0,044098  |
| XBP1        | -0,24793 | 0,016132  | -4,894   | 4,85E-04 | 0,0049924 |

|             |          |           |          |          |           |
|-------------|----------|-----------|----------|----------|-----------|
| cdc25C      | -0,04292 | 0,229565  | -0,47012 | 0,65319  | 0,7430087 |
| ATM_pS19    | -0,04503 | 0,019368  | -0,75503 | 0,475937 | 0,5762568 |
| N-Cadherin  | -0,05146 | -0,053096 | -0,97553 | 0,363205 | 0,4600599 |
| ZAP-70      | -0,05551 | 0,105245  | -0,78236 | 0,460763 | 0,5634078 |
| MSH6        | -0,05754 | -0,095416 | -0,59024 | 0,574397 | 0,6779627 |
| beta-Caten  | -0,05824 | 0,037597  | -0,58706 | 0,576405 | 0,6779627 |
| Cyclin_D1   | -0,0589  | -0,140117 | -0,90985 | 0,394464 | 0,4920839 |
| Glutamate   | -0,05912 | -0,161659 | -1,01008 | 0,347548 | 0,444789  |
| Chk1_pS29   | -0,06366 | -0,024299 | -0,88828 | 0,405158 | 0,5018846 |
| JNK2        | -0,0644  | -0,003338 | -1,11781 | 0,302133 | 0,3990735 |
| Raptor      | -0,07018 | 0,094162  | -1,1847  | 0,276466 | 0,3711125 |
| CD134       | -0,07033 | 0,1474    | -1,07888 | 0,317957 | 0,413344  |
| DM-Histon   | -0,07749 | 0,178097  | -1,21892 | 0,264059 | 0,3603457 |
| Tuberin_p1  | -0,08047 | 0,030326  | -1,523   | 0,173486 | 0,2628894 |
| GCLM        | -0,08184 | -0,007694 | -1,31115 | 0,232966 | 0,3288146 |
| Creb        | -0,08273 | 0,029571  | -1,46449 | 0,188359 | 0,2819681 |
| Jagged1     | -0,08358 | -0,255073 | -1,56374 | 0,163774 | 0,2498952 |
| OCT4        | -0,08438 | 0,083166  | -1,61517 | 0,152237 | 0,2379901 |
| MSI2        | -0,08455 | 0,189506  | -1,42272 | 0,199681 | 0,2918411 |
| p27-Kip-1   | -0,08616 | -0,17866  | -1,44399 | 0,19384  | 0,2864007 |
| HER3        | -0,08715 | -0,144546 | -1,5632  | 0,163899 | 0,2498952 |
| IGFBP2      | -0,08762 | 0,127348  | -0,93491 | 0,382307 | 0,4793395 |
| Sfhn11      | -0,09708 | -0,066141 | -1,05563 | 0,327722 | 0,4216005 |
| c-Jun_pS73  | -0,09713 | -0,261039 | -1,35224 | 0,220177 | 0,3143565 |
| Rictor      | -0,10149 | -0,15851  | -1,69216 | 0,136386 | 0,2173371 |
| BRD4        | -0,10243 | -0,010294 | -1,44056 | 0,194772 | 0,2864007 |
| TFRC        | -0,10351 | 0,423692  | -0,59613 | 0,570677 | 0,6776791 |
| PKC-delta   | -0,10618 | 0,01554   | -1,94196 | 0,095138 | 0,1631877 |
| PMS2        | -0,1069  | 0,14136   | -1,28062 | 0,242886 | 0,3389432 |
| Jak2        | -0,10903 | 3,33E-04  | -1,77367 | 0,12132  | 0,2011138 |
| p70S6K_pT   | -0,10932 | 0,066268  | -0,88584 | 0,406384 | 0,5018846 |
| Smad3       | -0,11093 | -0,04749  | -1,06217 | 0,324952 | 0,4202255 |
| GCN5L2      | -0,11127 | -0,141842 | -1,10175 | 0,30858  | 0,4054211 |
| SHP-2_pY5   | -0,11372 | -0,005081 | -1,81284 | 0,114661 | 0,1916666 |
| CD4         | -0,11859 | 0,126065  | -1,40431 | 0,204861 | 0,2976512 |
| Ets-1       | -0,11913 | 0,029213  | -2,19915 | 0,065532 | 0,1181149 |
| AMPK-a2_i   | -0,11918 | -0,25196  | -1,38655 | 0,209974 | 0,3032958 |
| D-a-Tubulin | -0,12001 | -0,021247 | -1,47906 | 0,18455  | 0,2779508 |
| PTEN        | -0,1206  | 0,391667  | -2,1152  | 0,07401  | 0,1315135 |
| Cdc2_pY15   | -0,12447 | 0,146667  | -2,01365 | 0,08575  | 0,1502142 |
| 53BP1       | -0,12579 | -0,537412 | -0,87951 | 0,409567 | 0,503299  |
| MMP2        | -0,12896 | -0,006025 | -2,28913 | 0,057534 | 0,1052666 |
| TAZ         | -0,13101 | -0,016504 | -1,67688 | 0,139403 | 0,2270208 |
| PAK4        | -0,13335 | -0,206457 | -2,56304 | 0,038818 | 0,0767051 |
| Rad51       | -0,14224 | 0,123587  | -2,51801 | 0,041397 | 0,0798835 |
| Granzyme-   | -0,14226 | 0,287889  | -1,94506 | 0,094712 | 0,1631877 |
| C-Raf       | -0,1492  | 0,027571  | -2,73584 | 0,03038  | 0,0635929 |
| VEGFR-2     | -0,15015 | -0,258649 | -2,51138 | 0,041792 | 0,0800201 |
| PD-L1       | -0,15136 | 0,053002  | -2,54202 | 0,04     | 0,0777962 |
| VASP        | -0,15443 | -0,79474  | -1,73271 | 0,128679 | 0,2102227 |
| Glutaminsae | -0,16944 | 0,03487   | -2,42971 | 0,046984 | 0,0885875 |
| 14-3-3_beta | -0,17243 | 0,016716  | -2,63356 | 0,035111 | 0,0705078 |
| XBP1        | -0,17389 | 0,114646  | -2,80976 | 0,027382 | 0,0583048 |
| IRF-1       | -0,17441 | 0,032658  | -2,67768 | 0,032982 | 0,0678885 |
| MYH11       | -0,17671 | -0,018565 | -3,17057 | 0,016645 | 0,0387865 |
| INPP4b      | -0,18093 | 0,022965  | -3,00863 | 0,02077  | 0,046217  |
| FoxO3a      | -0,18691 | 0,081383  | -3,20605 | 0,015864 | 0,0373192 |
| Axl         | -0,18778 | 0,175097  | -3,47248 | 0,011124 | 0,0283261 |
| P-Cadherin  | -0,19236 | -0,038015 | -3,31283 | 0,013744 | 0,0332818 |
| Wee1_pS6    | -0,19312 | 0,054334  | -3,72218 | 0,008052 | 0,0228591 |
| eEF2K       | -0,19548 | -0,047663 | -1,28135 | 0,242646 | 0,3389432 |
| PEA15       | -0,19758 | -0,070949 | -1,24298 | 0,255622 | 0,354712  |
| EGFR        | -0,19836 | -0,358619 | -1,20859 | 0,267753 | 0,363379  |
| Atg3        | -0,19938 | 0,20625   | -2,87195 | 0,025102 | 0,0543879 |
| Claudin-7   | -0,20193 | -0,300118 | -3,44577 | 0,011522 | 0,0290396 |
| PEA15_pS1   | -0,20226 | -0,212926 | -1,44046 | 0,194799 | 0,2864007 |
| Smad1       | -0,20614 | -0,031447 | -3,39845 | 0,012265 | 0,030293  |
| Beclin      | -0,20638 | 0,082546  | -3,28545 | 0,014257 | 0,0341886 |
| AR          | -0,20926 | 0,202032  | -4,06792 | 0,005227 | 0,0161384 |

|             |          |           |          |          |           |
|-------------|----------|-----------|----------|----------|-----------|
| PDHK1       | -0,24969 | -0,141532 | -4,83918 | 5,29E-04 | 0,0052289 |
| PR          | -0,25538 | 0,031221  | -4,62549 | 7,46E-04 | 0,0063553 |
| Sox2        | -0,27523 | 0,266721  | -1,20916 | 0,252109 | 0,3797007 |
| TTF1        | -0,27763 | 0,059937  | -4,58585 | 7,96E-04 | 0,0065523 |
| Collagen_V  | -0,28817 | -0,072339 | -3,15669 | 0,009201 | 0,0304905 |
| Gys_pS641   | -0,29197 | -0,221008 | -4,19661 | 0,001515 | 0,0093546 |
| TFRC        | -0,29611 | 0,24353   | -1,45362 | 0,174154 | 0,2848743 |
| MSI2        | -0,32677 | -0,02712  | -5,08369 | 3,60E-04 | 0,004157  |
| B-Raf_pS44  | -0,33541 | -0,001932 | -2,50787 | 0,029219 | 0,0680857 |
| SDHA        | -0,34936 | -0,159111 | -4,4032  | 0,001074 | 0,0079908 |
| Stat3_pY7C  | -0,35056 | -0,137707 | -3,70164 | 0,003529 | 0,0164203 |
| Pdcd4       | -0,35882 | -0,201283 | -2,09119 | 0,060675 | 0,1289559 |
| HSP27_pS8   | -0,36439 | 0,019929  | -2,68632 | 0,021274 | 0,0547365 |
| AR          | -0,36478 | 0,029133  | -3,98232 | 0,002177 | 0,0122401 |
| Fibronectin | -0,36594 | -0,081243 | -0,67256 | 0,515194 | 0,6254047 |
| Glutaminas  | -0,38097 | -0,175164 | -1,99715 | 0,071316 | 0,1432118 |
| ATM         | -0,3847  | 0,220743  | -2,75482 | 0,018829 | 0,0511061 |
| SOD2        | -0,39075 | -0,00217  | -5,75394 | 1,31E-04 | 0,0021542 |
| p70S6K_pT   | -0,39572 | -0,191915 | -2,10826 | 0,058912 | 0,1276423 |
| B-Raf       | -0,39896 | -0,012151 | -3,33268 | 0,006736 | 0,0241119 |
| ULK1_pS75   | -0,42069 | -0,005227 | -4,72419 | 6,36E-04 | 0,0060253 |
| LDHA        | -0,44425 | -0,041709 | -2,82167 | 0,016712 | 0,0463804 |
| Cyclin_B1   | -0,44665 | 0,056019  | -4,26203 | 0,001358 | 0,0089284 |
| Gys         | -0,46584 | -0,262499 | -6,48289 | 4,67E-05 | 9,61E-04  |
| Axl         | -0,48951 | -0,112747 | -5,70622 | 1,40E-04 | 0,0021659 |
| Cox-IV      | -0,51711 | -0,001632 | -4,23952 | 0,00141  | 0,0089284 |
| Mcl-1       | -0,5315  | -0,056949 | -2,00174 | 0,070759 | 0,1432118 |
| Myosin-IIa  | -0,56759 | -0,042934 | -3,00941 | 0,011957 | 0,0364621 |
| Atg3        | -0,5694  | -0,139995 | -7,22159 | 1,77E-05 | 4,90E-04  |
| PLK1        | -0,58795 | -0,05959  | -3,76235 | 0,003177 | 0,0153978 |
| PI3K-p85    | -0,63576 | 0,037165  | -9,3692  | 1,48E-06 | 1,22E-04  |
| TRIM25      | -0,65172 | -0,111768 | -3,25323 | 0,007752 | 0,0269689 |
| Granzyme-   | -0,67573 | -0,179623 | -7,87182 | 7,92E-06 | 3,26E-04  |
| S6_pS240    | -0,68602 | -0,198127 | -1,49949 | 0,162064 | 0,2741772 |
| PTEN        | -0,731   | -0,134067 | -4,24212 | 0,001404 | 0,0089284 |
| PKC-alpha   | -0,73215 | -0,187465 | -3,91269 | 0,002452 | 0,0131676 |
| AMPK_pT1    | -0,78377 | -0,133669 | -3,97227 | 0,002215 | 0,0122401 |
| S6_pS235    | -0,80664 | -0,269325 | -1,32602 | 0,211876 | 0,3312243 |
| Stat3       | -0,89634 | -0,433704 | -3,59133 | 0,004276 | 0,0185294 |
| PAR         | -0,90248 | 1,00175   | -1,54287 | 0,151303 | 0,2631822 |
| Heregulin   | -0,93558 | -0,049425 | -5,06575 | 3,70E-04 | 0,004157  |
| STAT5-alpha | -0,95745 | -0,111603 | -6,36315 | 5,50E-05 | 0,0010269 |
| PDGFR-b     | -2,77677 | -1,172098 | -30,5446 | 6,21E-12 | 1,53E-09  |

|            |          |           |          |          |           |
|------------|----------|-----------|----------|----------|-----------|
| PREX1      | -0,2105  | 0,01283   | -2,29758 | 0,056836 | 0,1047657 |
| Rab11      | -0,22434 | -0,153641 | -2,10942 | 0,074633 | 0,1316734 |
| MIF        | -0,23139 | -0,023785 | -4,21668 | 0,004365 | 0,0141847 |
| eIF4E_pS2C | -0,23782 | 0,008209  | -4,27932 | 0,004049 | 0,0133362 |
| ULK1_pS75  | -0,24075 | 0,194529  | -3,39095 | 0,012387 | 0,030293  |
| RPA32_pS4  | -0,24076 | -0,363868 | -2,55644 | 0,039186 | 0,0768163 |
| p70-S6K1   | -0,24881 | -0,016118 | -3,88946 | 0,006518 | 0,0196337 |
| SOD2       | -0,25126 | 0,166774  | -4,31333 | 0,003889 | 0,0131586 |
| RBM15      | -0,25367 | 0,095418  | -4,00354 | 0,005657 | 0,0172507 |
| ER-alpha   | -0,2694  | 0,072059  | -4,38667 | 0,003566 | 0,0127663 |
| B-Raf_pS44 | -0,27987 | 0,104569  | -3,51451 | 0,010528 | 0,0273731 |
| A-Raf      | -0,29433 | 0,052879  | -4,72652 | 0,002412 | 0,0099295 |
| HSP70      | -0,29789 | -0,329619 | -2,71675 | 0,03121  | 0,0647802 |
| Cyclin_B1  | -0,30724 | 0,237113  | -4,47017 | 0,003235 | 0,0122912 |
| ATM        | -0,31496 | 0,346519  | -2,63756 | 0,034912 | 0,0705078 |
| TTF1       | -0,31568 | 0,097674  | -5,23531 | 0,001385 | 0,0065509 |
| b-Actin    | -0,33762 | -0,255878 | -4,66094 | 0,002598 | 0,0104183 |
| Cox-IV     | -0,37275 | 0,197812  | -4,62509 | 0,002706 | 0,0106087 |
| eEF2       | -0,37502 | -0,023708 | -3,48264 | 0,010977 | 0,028242  |
| B-Raf      | -0,39284 | 0,078568  | -7,40208 | 1,85E-04 | 0,0013065 |
| PLK1       | -0,40314 | 0,179577  | -5,07954 | 0,001635 | 0,0073431 |
| PI3K-p85   | -0,41028 | 0,311163  | -5,98445 | 6,51E-04 | 0,0034941 |
| c-Myc      | -0,41846 | -0,261359 | -4,65506 | 0,002615 | 0,0104183 |
| ARID1A     | -0,42873 | -0,318287 | -4,87571 | 0,002042 | 0,0085497 |
| HSP27_pS8  | -0,45719 | 0,043754  | -4,29815 | 0,00396  | 0,0132169 |
| DUSP4      | -0,46174 | 0,002738  | -8,67448 | 7,00E-05 | 6,40E-04  |
| Rad50      | -0,49539 | -0,364531 | -4,59453 | 0,002802 | 0,0108141 |
| Merlin     | -0,4973  | -0,364996 | -4,13384 | 0,004824 | 0,0152748 |
| Myosin-IIa | -0,51024 | 0,115317  | -3,59979 | 0,009423 | 0,0255765 |
| TRIM25     | -0,51024 | 0,115317  | -3,59979 | 0,009423 | 0,0255765 |
| NF-kB-p65  | -0,51796 | -0,210527 | -8,6935  | 6,90E-05 | 6,40E-04  |
| FAK_pY397  | -0,54151 | -0,02003  | -7,45072 | 1,78E-04 | 0,0013065 |
| Connexin-4 | -0,54986 | -0,005134 | -6,74757 | 3,22E-04 | 0,0019426 |
| IRS1       | -0,56784 | -0,091901 | -9,31209 | 4,49E-05 | 4,52E-04  |
| Sox2       | -0,57945 | 0,144242  | -7,32754 | 1,97E-04 | 0,0013138 |
| Gab2       | -0,60218 | -0,972387 | -9,2849  | 4,58E-05 | 4,52E-04  |
| PKC-alpha  | -0,71892 | -0,019783 | -12,4502 | 7,07E-06 | 1,03E-04  |
| p16_INK4a  | -0,93593 | -1,065797 | -14,4963 | 2,63E-06 | 4,65E-05  |
| Heregulin  | -1,02453 | 0,101335  | -18,0143 | 6,35E-07 | 1,57E-05  |
| PDGFR-b    | -1,08412 | 0,449338  | -19,4359 | 3,85E-07 | 1,06E-05  |
| E-Cadherin | -1,36551 | -1,085202 | -4,44167 | 0,003344 | 0,0124122 |
| Cox2       | -2,24692 | -0,342198 | -34,5506 | 8,46E-09 | 9,01E-07  |
| PAR        | -2,5017  | 0,239122  | -25,1183 | 7,06E-08 | 2,90E-06  |

## Subtype A vs. MGT7

| Protein     | logFC    | AveExpr   | t        | P.Value  | adj.P.Val |
|-------------|----------|-----------|----------|----------|-----------|
| E-Cadherin  | 4,077979 | 1,851072  | 13,59682 | 3,49E-08 | 1,73E-06  |
| P-Met_pY1   | 3,905679 | -0,561518 | 8,062376 | 6,39E-06 | 8,49E-05  |
| RSK         | 2,093323 | -0,522712 | 17,44287 | 2,58E-09 | 2,12E-07  |
| CDK1        | 2,055225 | -0,044656 | 6,337862 | 5,75E-05 | 3,23E-04  |
| ARID1A      | 1,990081 | 0,479544  | 5,962624 | 9,74E-05 | 4,63E-04  |
| Claudin-7   | 1,973089 | 1,311605  | 7,625586 | 1,08E-05 | 1,03E-04  |
| Rb_pS807_   | 1,75058  | -0,113102 | 5,758942 | 1,31E-04 | 5,87E-04  |
| Cox2        | 1,715259 | 0,635351  | 2,416961 | 0,034359 | 0,0606194 |
| Bim         | 1,640005 | 0,183023  | 4,214912 | 0,001475 | 0,0044977 |
| ACC_pS79    | 1,626265 | -0,122915 | 4,328442 | 0,001221 | 0,0039119 |
| Connexin-4  | 1,604578 | 0,22003   | 6,424789 | 5,10E-05 | 3,02E-04  |
| Rad50       | 1,484122 | 0,301541  | 7,84141  | 8,30E-06 | 8,92E-05  |
| FASN        | 1,27253  | -0,140903 | 10,44204 | 5,14E-07 | 1,50E-05  |
| ACC1        | 1,219935 | 0,109605  | 6,171473 | 7,24E-05 | 0,000389  |
| PAR         | 1,188793 | 0,62152   | 2,029457 | 0,067524 | 0,1030536 |
| 53BP1       | 1,147778 | 0,719624  | 3,536219 | 0,004722 | 0,01178   |
| GCN5L2      | 1,090841 | 0,203806  | 9,041021 | 2,13E-06 | 4,04E-05  |
| 4E-BP1_pS1  | 1,053014 | 0,270633  | 8,000785 | 6,87E-06 | 8,49E-05  |
| Src_pY416   | 0,971179 | -0,178759 | 4,825654 | 5,44E-04 | 0,0019745 |
| IRS1        | 0,9708   | 0,188377  | 2,63659  | 0,023276 | 0,0438869 |
| p90RSK_pT   | 0,943846 | -0,085843 | 8,897744 | 2,49E-06 | 4,39E-05  |
| ATM         | 0,881887 | -0,009546 | 6,501237 | 4,59E-05 | 2,91E-04  |
| PARP        | 0,817498 | 0,237528  | 7,295409 | 1,62E-05 | 1,29E-04  |
| Akt_pS473   | 0,808969 | -0,222421 | 3,568563 | 0,004462 | 0,0114804 |
| Notch1      | 0,793386 | -0,282907 | 3,537211 | 0,004713 | 0,01178   |
| c-Jun_pS73  | 0,789696 | 0,239301  | 6,09568  | 8,06E-05 | 4,06E-04  |
| beta-Caten  | 0,750219 | 0,225981  | 4,315244 | 0,001248 | 0,0039119 |
| c-Myc       | 0,71508  | 0,21677   | 7,349606 | 1,52E-05 | 1,25E-04  |
| C-Raf_pS33  | 0,619967 | 0,059052  | 4,13766  | 0,001679 | 0,0050585 |
| PAK1        | 0,590111 | -0,114631 | 1,930564 | 0,079928 | 0,1189295 |
| RPA32_pS4   | 0,583537 | -0,063773 | 6,43274  | 5,04E-05 | 3,02E-04  |
| PI3K-p85    | 0,578939 | -0,183689 | 8,546006 | 3,67E-06 | 5,90E-05  |
| HES1        | 0,575656 | 0,231788  | 1,256218 | 0,23527  | 0,3026657 |
| eIF4E       | 0,550199 | -0,025588 | 6,108774 | 7,91E-05 | 4,06E-04  |
| Cdc2_pY15   | 0,5306   | 0,01096   | 4,900449 | 4,83E-04 | 0,0018066 |
| Bid         | 0,520625 | 0,129638  | 3,549615 | 0,004612 | 0,0117445 |
| RBM15       | 0,504069 | 0,490142  | 0,941461 | 0,366848 | 0,4441738 |
| Src_pY527   | 0,495044 | 0,037893  | 2,216448 | 0,048859 | 0,0807804 |
| HER3        | 0,484719 | 0,504228  | 2,581701 | 0,025662 | 0,0473706 |
| eEF2        | 0,478251 | 0,01111   | 2,996859 | 0,01225  | 0,0254274 |
| AMPK_alph   | 0,444753 | -0,170229 | 4,313517 | 0,001251 | 0,0039119 |
| Smad3       | 0,437212 | 0,147645  | 5,818215 | 1,20E-04 | 5,59E-04  |
| Akt_pT308   | 0,433648 | -0,06235  | 1,968314 | 0,074962 | 0,1129002 |
| PKC-b-II_pS | 0,427428 | -0,185356 | 3,442722 | 0,005562 | 0,0134699 |
| Caspase-3   | 0,427404 | 0,154166  | 5,252264 | 2,79E-04 | 0,0011333 |
| Bcl-xL      | 0,420292 | 0,182625  | 3,147138 | 0,009378 | 0,020498  |
| c-Kit       | 0,411685 | 0,198267  | 5,25049  | 2,80E-04 | 0,0011333 |
| Wee1_pS6    | 0,40153  | 0,142258  | 4,645249 | 7,26E-04 | 0,0023914 |
| Paxillin    | 0,385944 | -0,017222 | 6,852062 | 2,87E-05 | 2,07E-04  |
| Histone-H3  | 0,366995 | 0,057748  | 2,099147 | 0,059892 | 0,0954415 |
| Shc_pY317   | 0,365979 | -0,208821 | 3,786027 | 0,003059 | 0,0084894 |
| HSP70       | 0,360941 | 0,055002  | 4,667178 | 7,01E-04 | 0,0023714 |
| 14-3-3_zeta | 0,354151 | -0,00447  | 3,090472 | 0,010371 | 0,0222748 |
| FAK         | 0,34764  | -0,018272 | 3,843346 | 0,002771 | 0,0077789 |
| PRAS40_pT   | 0,342914 | -0,107622 | 1,167702 | 0,267813 | 0,3392298 |
| VASP        | 0,3403   | -0,031485 | 1,781609 | 0,102633 | 0,1491199 |
| Lck         | 0,333933 | 0,086966  | 2,531525 | 0,028053 | 0,0504822 |
| XRCC1       | 0,333274 | -0,004986 | 3,395825 | 0,006041 | 0,0142101 |
| Sox2        | 0,332648 | 0,156197  | 1,460706 | 0,172288 | 0,2325423 |
| DM-K9-His1  | 0,311906 | -0,030843 | 4,64969  | 7,21E-04 | 0,0023914 |
| Caspase-7   | 0,31119  | -0,113361 | 2,543016 | 0,027486 | 0,0499203 |
| Chk2_pT68   | 0,310569 | -0,020476 | 3,082131 | 0,010526 | 0,0224127 |
| Myt1        | 0,30976  | -0,038003 | 3,199444 | 0,008547 | 0,019191  |
| Merlin      | 0,309137 | 0,081024  | 1,768057 | 0,104967 | 0,1516185 |
| DJ-1        | 0,298587 | 0,133255  | 3,448291 | 0,005508 | 0,0134699 |
| WIPI1       | 0,293815 | 0,245293  | 1,298115 | 0,221019 | 0,288845  |

## subtype B vs. MGT 7

| Protein     | logFC    | AveExpr   | t        | P.Value  | adj.P.Val |
|-------------|----------|-----------|----------|----------|-----------|
| P-Met_pY1   | 4,697158 | -0,938778 | 74,92326 | 1,46E-10 | 3,62E-08  |
| RSK         | 2,683463 | -0,625353 | 54,86156 | 1,05E-09 | 1,29E-07  |
| Notch1      | 2,347481 | 0,476448  | 45,8311  | 3,26E-09 | 2,03E-07  |
| Rb_pS807_   | 2,18387  | -0,235072 | 39,93065 | 7,76E-09 | 3,83E-07  |
| ACC_pS79    | 2,067445 | -0,213028 | 23,94125 | 1,93E-07 | 4,51E-06  |
| CDK1        | 1,97376  | -0,541948 | 38,45157 | 9,84E-09 | 4,05E-07  |
| Fibronectin | 1,530955 | 1,205599  | 9,730992 | 4,91E-05 | 2,53E-04  |
| Akt_pS473   | 1,368307 | -0,06332  | 13,46006 | 6,88E-06 | 6,30E-05  |
| Bim         | 1,28209  | -0,389545 | 24,19337 | 1,81E-07 | 4,51E-06  |
| FASN        | 1,22342  | -0,448012 | 14,95374 | 3,60E-06 | 3,58E-05  |
| HES1        | 1,220882 | 0,493327  | 21,1277  | 4,21E-07 | 6,94E-06  |
| ACC1        | 1,207576 | -0,163979 | 21,16275 | 4,17E-07 | 6,94E-06  |
| Src_pY416   | 1,029589 | -0,355606 | 18,66111 | 9,13E-07 | 1,11E-05  |
| PKA-a       | 0,985279 | 0,443107  | 19,2266  | 7,59E-07 | 1,04E-05  |
| ATM         | 0,951623 | -0,160116 | 8,725685 | 9,39E-05 | 4,37E-04  |
| p90RSK_pT   | 0,890456 | -0,323807 | 10,28256 | 3,53E-05 | 2,03E-04  |
| Connexin-4  | 0,867729 | -0,57217  | 10,61205 | 2,92E-05 | 1,76E-04  |
| Pdcd4       | 0,811065 | 0,126594  | 11,36853 | 1,93E-05 | 1,22E-04  |
| PI3K-p85    | 0,804418 | -0,174715 | 12,15262 | 1,29E-05 | 9,34E-05  |
| Akt_pT308   | 0,800977 | 0,063433  | 9,42914  | 5,93E-05 | 2,93E-04  |
| STAT5-alpha | 0,729843 | 0,553266  | 12,95944 | 8,68E-06 | 6,70E-05  |
| IGFRb       | 0,673653 | 0,876255  | 13,66633 | 6,27E-06 | 5,96E-05  |
| ARID1A      | 0,658924 | -0,75335  | 7,53846  | 2,20E-04 | 8,26E-04  |
| LRP6_pS14   | 0,641061 | 0,293243  | 11,98267 | 1,40E-05 | 9,88E-05  |
| Shc_pY317   | 0,607148 | -0,143969 | 9,197737 | 6,87E-05 | 3,33E-04  |
| PAK1        | 0,585795 | -0,245972 | 11,11462 | 2,21E-05 | 1,36E-04  |
| AMPK_alph   | 0,582495 | -0,184621 | 10,14781 | 3,82E-05 | 2,15E-04  |
| XRCC1       | 0,525977 | 0,037921  | 6,388376 | 5,63E-04 | 0,0018298 |
| Cdc2_pY15   | 0,520045 | -0,11114  | 7,186166 | 2,90E-04 | 0,0010225 |
| Wee1        | 0,506484 | 0,139087  | 8,132213 | 1,42E-04 | 6,15E-04  |
| GCN5L2      | 0,502351 | -0,38729  | 5,969369 | 8,19E-04 | 0,0023802 |
| Mcl-1       | 0,499886 | 0,347536  | 7,515356 | 2,24E-04 | 8,26E-04  |
| 4E-BP1_pS1  | 0,495256 | -0,29377  | 8,153183 | 1,40E-04 | 6,15E-04  |
| AMPK_pT1    | 0,486715 | 0,997887  | 4,799688 | 0,002606 | 0,0060716 |
| Bid         | 0,484994 | -0,00533  | 3,802381 | 0,00811  | 0,0147343 |
| PRAS40_pT   | 0,479974 | -0,100203 | 8,915874 | 8,26E-05 | 3,93E-04  |
| RIP         | 0,462285 | 0,106685  | 1,844754 | 0,112134 | 0,1465453 |
| Caspase-7   | 0,449403 | -0,098329 | 8,343125 | 1,22E-04 | 5,59E-04  |
| PTEN        | 0,448663 | 0,163963  | 9,436692 | 5,90E-05 | 2,93E-04  |
| PKC-b-II_pS | 0,433918 | -0,274718 | 6,139734 | 7,02E-04 | 0,0021397 |
| Tuberin     | 0,409148 | 0,22117   | 4,123747 | 0,005535 | 0,0110677 |
| Bad_pS112   | 0,405622 | -0,121011 | 5,186137 | 0,001744 | 0,0045816 |
| beta-Caten  | 0,402134 | -0,146554 | 6,042147 | 7,66E-04 | 0,0023086 |
| Paxillin    | 0,39243  | -0,097537 | 7,902622 | 1,68E-04 | 6,86E-04  |
| mTOR        | 0,387562 | -0,066634 | 7,952201 | 1,62E-04 | 6,77E-04  |
| PARP        | 0,373534 | -0,207213 | 3,540071 | 0,011208 | 0,0197741 |
| Chk2_pT68   | 0,368514 | -0,05347  | 5,439334 | 0,001355 | 0,0035975 |
| eIF4E       | 0,350416 | -0,265501 | 6,760994 | 4,10E-04 | 0,0013834 |
| Rad50       | 0,350054 | -0,702708 | 3,519606 | 0,0115   | 0,0201447 |
| Myt1        | 0,325818 | -0,095952 | 5,030162 | 0,002046 | 0,0050525 |
| HER2_pY12   | 0,319297 | 0,094711  | 4,232412 | 0,004881 | 0,0101314 |
| WIPI1       | 0,294558 | 0,181634  | 3,502838 | 0,011745 | 0,0204291 |
| IRS1        | 0,286879 | -0,433787 | 3,969903 | 0,006632 | 0,0130014 |
| STING       | 0,27701  | 0,433335  | 2,789512 | 0,029918 | 0,0461539 |
| 14-3-3_zeta | 0,271302 | -0,131449 | 5,086183 | 0,001931 | 0,0049116 |
| Stathmin    | 0,267642 | -0,142018 | 4,610754 | 0,003195 | 0,0072399 |
| COG3        | 0,26554  | 0,083359  | 3,802082 | 0,008113 | 0,0147343 |
| Bak         | 0,250272 | -0,090717 | 3,83869  | 0,007761 | 0,0143458 |
| YB1_pS102   | 0,248613 | -0,039595 | 3,901744 | 0,007194 | 0,0135278 |
| Raptor      | 0,247552 | -0,032933 | 4,238046 | 0,00485  | 0,0101314 |
| SDHA        | 0,245534 | 0,121946  | 3,433324 | 0,012824 | 0,0216948 |
| Caspase-3   | 0,238695 | -0,052312 | 3,961999 | 0,006695 | 0,0130208 |
| FAK         | 0,23667  | -0,160703 | 2,734696 | 0,032237 | 0,0485526 |
| DM-K9-His1  | 0,231501 | -0,147139 | 3,087097 | 0,020079 | 0,0324157 |
| C-Raf       | 0,225082 | -0,122143 | 4,418151 | 0,003954 | 0,0085667 |
| IGFBP2      | 0,218739 | 0,004805  | 1,89843  | 0,103935 | 0,1372836 |

|             |          |           |          |          |           |
|-------------|----------|-----------|----------|----------|-----------|
| PAICS       | 0,290497 | 0,348264  | 1,187647 | 0,260186 | 0,3312678 |
| Bak         | 0,263146 | -0,025579 | 3,326898 | 0,006821 | 0,0157461 |
| DUSP4       | 0,259141 | 0,04823   | 2,047837 | 0,065427 | 0,1010029 |
| Bad_pS112   | 0,25529  | -0,15551  | 3,110719 | 0,010004 | 0,021676  |
| HER2_pY12   | 0,252006 | 0,109319  | 1,324687 | 0,212352 | 0,2813903 |
| p38_pT180   | 0,244549 | 0,152977  | 3,217093 | 0,008283 | 0,0187706 |
| p27_pT198   | 0,242723 | 0,08116   | 2,729391 | 0,019731 | 0,0386796 |
| Rictor      | 0,231252 | 0,003434  | 2,248235 | 0,04622  | 0,077663  |
| Wee1        | 0,230033 | 0,023405  | 1,07217  | 0,306787 | 0,3827096 |
| mTOR        | 0,227446 | -0,113079 | 2,147609 | 0,055074 | 0,0883326 |
| EGFR_pY11   | 0,222039 | -0,020761 | 4,315428 | 0,001247 | 0,0039119 |
| C-Raf       | 0,217194 | -0,079488 | 2,02889  | 0,06759  | 0,1030536 |
| Stathmin    | 0,215478 | -0,126303 | 2,337273 | 0,039539 | 0,0682952 |
| Elk1_pS38   | 0,212288 | -0,025692 | 3,610465 | 0,004147 | 0,0107835 |
| ATR_pS42E   | 0,211757 | 0,022845  | 3,414579 | 0,005845 | 0,0138809 |
| TUFM        | 0,210513 | 0,137065  | 2,61265  | 0,024288 | 0,0454489 |
| Raptor      | 0,208643 | -0,010756 | 2,375235 | 0,036984 | 0,0647868 |
| ER-alpha_p  | 0,208631 | 0,195351  | 2,953036 | 0,013245 | 0,0270372 |
| Bax         | 0,196227 | 0,010879  | 0,440265 | 0,66834  | 0,7219861 |
| MEK1_pS2    | 0,195554 | 0,025863  | 3,328584 | 0,006801 | 0,0157461 |
| Chk1_pS29   | 0,18635  | -0,063817 | 2,978386 | 0,01266  | 0,0260589 |
| A-Raf       | 0,185335 | -0,02201  | 1,464524 | 0,171263 | 0,2324288 |
| b-Actin     | 0,169691 | 0,160934  | 1,054955 | 0,314248 | 0,3900466 |
| Tyro3       | 0,168276 | -0,014282 | 3,054048 | 0,011065 | 0,0233592 |
| TAZ         | 0,155878 | 0,184933  | 1,815747 | 0,096962 | 0,1425579 |
| GCLM        | 0,150735 | -0,011929 | 3,187728 | 0,008726 | 0,0194173 |
| EGFR        | 0,147047 | -0,047453 | 1,591412 | 0,140054 | 0,1943441 |
| NAPSIN-A    | 0,146958 | -0,080924 | 1,935652 | 0,079242 | 0,1186224 |
| UBAC1       | 0,143835 | -0,04358  | 1,511115 | 0,159169 | 0,2172084 |
| NF-kB-p65   | 0,138268 | -0,007839 | 0,931245 | 0,371876 | 0,4480651 |
| eIF4G       | 0,133138 | 0,068523  | 1,787907 | 0,101565 | 0,1484409 |
| PDK1        | 0,131864 | -0,009512 | 2,086559 | 0,061208 | 0,0959359 |
| YB1_pS102   | 0,130538 | -0,081959 | 1,322557 | 0,213036 | 0,2813903 |
| MSH6        | 0,117776 | 0,164421  | 0,748335 | 0,470083 | 0,5425722 |
| AMPK-a2_f   | 0,116284 | -0,086014 | 1,096294 | 0,296559 | 0,3737254 |
| Notch3      | 0,116038 | 0,05209   | 2,258598 | 0,04539  | 0,0767905 |
| eIF4E_pS2C  | 0,113283 | 0,00323   | 1,683749 | 0,12059  | 0,1708614 |
| RIP         | 0,100239 | -0,088672 | 0,438797 | 0,669372 | 0,7219861 |
| p16_INK4a   | 0,100033 | 0,299067  | 0,373217 | 0,716137 | 0,7657393 |
| PI3K-p110-  | 0,09905  | -0,062117 | 2,304663 | 0,04187  | 0,0718194 |
| Pdcd4       | 0,093523 | -0,283527 | 0,544331 | 0,597163 | 0,658033  |
| p27-Kip-1   | 0,092997 | -0,05325  | 1,861886 | 0,089752 | 0,1327472 |
| Tuberin     | 0,092488 | 0,051353  | 0,816781 | 0,431528 | 0,5075587 |
| XPF         | 0,08906  | -0,131189 | 1,587525 | 0,14093  | 0,1944682 |
| Aurora-B    | 0,087973 | -0,024936 | 0,885671 | 0,394897 | 0,4689401 |
| Rab11       | 0,085186 | -0,054335 | 0,738243 | 0,475947 | 0,5467861 |
| FOXO3a_p1   | 0,083044 | -0,073689 | 1,614393 | 0,134967 | 0,1883432 |
| YAP         | 0,081174 | -0,057171 | 1,089494 | 0,299416 | 0,3754096 |
| IGFBP2      | 0,079857 | -0,061101 | 0,593631 | 0,564863 | 0,6341875 |
| PEA15_pS1   | 0,070285 | -0,002652 | 0,382432 | 0,709486 | 0,7619261 |
| Ets-1       | 0,06179  | 0,040532  | 1,220786 | 0,247895 | 0,3172537 |
| p53         | 0,06094  | 0,003464  | 0,455481 | 0,657695 | 0,7156414 |
| MDM2_pS:    | 0,05173  | -0,168872 | 0,477976 | 0,642101 | 0,7017648 |
| 4E-BP1      | 0,050315 | 0,164505  | 0,250601 | 0,80678  | 0,8408209 |
| Cyclin_D1   | 0,045221 | 0,016667  | 0,563676 | 0,584375 | 0,6472668 |
| TIGAR       | 0,039477 | 0,060019  | 0,334432 | 0,744394 | 0,7824057 |
| D-a-Tubulin | 0,037758 | -0,056284 | 0,627801 | 0,543051 | 0,6152922 |
| AR          | 0,018574 | -0,040568 | 0,197774 | 0,846858 | 0,8727302 |
| JNK2        | 0,011897 | -0,004291 | 0,121746 | 0,905314 | 0,9240183 |
| clAP        | 0,002476 | -0,046568 | 0,050399 | 0,960715 | 0,96587   |
| b-Catenin_  | 2,89E-05 | 0,070485  | 3,62E-04 | 0,999718 | 0,9997176 |
| Akt         | -0,00926 | -0,07518  | -0,0488  | 0,96196  | 0,96587   |
| mTOR_pS2    | -0,01366 | -0,141743 | -0,08319 | 0,935205 | 0,9467033 |
| PKA-a       | -0,0203  | -0,164673 | -0,16907 | 0,868835 | 0,8904658 |
| PLC-gamma:  | -0,02153 | 0,030147  | -0,33716 | 0,742393 | 0,7824057 |
| Sf1n11      | -0,02255 | -0,09016  | -0,25396 | 0,804249 | 0,8408209 |
| c-Abl       | -0,03094 | -0,081375 | -0,58467 | 0,570663 | 0,6377998 |
| U-Histone-  | -0,03409 | -0,00702  | -0,3345  | 0,744342 | 0,7824057 |
| MSI2        | -0,03581 | -0,080021 | -0,57022 | 0,580082 | 0,645407  |

|             |          |           |          |          |           |
|-------------|----------|-----------|----------|----------|-----------|
| Tyro3       | 0,216841 | -0,021857 | 4,213207 | 0,00499  | 0,0102712 |
| Lck         | 0,214116 | -0,057782 | 2,749367 | 0,031598 | 0,0478822 |
| PI3K-p110-  | 0,206945 | -0,018991 | 4,176665 | 0,005205 | 0,0105379 |
| XPF         | 0,206908 | -0,079911 | 4,263259 | 0,004712 | 0,0100325 |
| eEF2        | 0,20647  | -0,256304 | 2,235929 | 0,064486 | 0,0899894 |
| MSI2        | 0,206411 | 0,073123  | 3,944605 | 0,006835 | 0,0130871 |
| IGF1R_pY1   | 0,203077 | 0,268704  | 3,15669  | 0,018323 | 0,0301385 |
| p21         | 0,196038 | -0,030453 | 3,725141 | 0,008911 | 0,0159489 |
| UBAC1       | 0,191785 | -0,046192 | 3,92717  | 0,006979 | 0,0132594 |
| EGFR_pY11   | 0,189005 | -0,087553 | 3,705302 | 0,00913  | 0,0162243 |
| mTOR_pS2    | 0,186438 | -0,018703 | 2,700916 | 0,033761 | 0,0502354 |
| Histone-H3  | 0,184841 | -0,131616 | 1,711879 | 0,135249 | 0,1695762 |
| AR          | 0,174091 | 0,04869   | 3,060825 | 0,020789 | 0,0333433 |
| ATR_pS42E   | 0,169321 | -0,048818 | 2,39691  | 0,051438 | 0,0734402 |
| Chk1_pS29   | 0,166521 | -0,116373 | 2,190569 | 0,068747 | 0,0953957 |
| Elk1_pS38:  | 0,164145 | -0,100894 | 3,258162 | 0,016054 | 0,0267929 |
| Wee1_pS6    | 0,163351 | -0,088256 | 1,790287 | 0,121102 | 0,1557927 |
| SLC1A5      | 0,161474 | 0,51657   | 2,657443 | 0,035836 | 0,0526878 |
| MAPK_pT2    | 0,155805 | 0,083148  | 1,900907 | 0,103572 | 0,1372836 |
| c-Kit       | 0,15214  | -0,047281 | 1,584196 | 0,161743 | 0,1997521 |
| GATA6       | 0,150994 | 0,039006  | 3,044622 | 0,02124  | 0,0338469 |
| FOXO3a_p:   | 0,140839 | -0,05713  | 2,660797 | 0,035671 | 0,0526878 |
| S6_pS240_   | 0,12355  | 0,445644  | 1,144789 | 0,293792 | 0,3406887 |
| YAP         | 0,122936 | -0,049824 | 2,363145 | 0,053928 | 0,0765528 |
| Bax         | 0,122129 | -0,076393 | 2,416638 | 0,050038 | 0,0718576 |
| p27_pT198   | 0,121086 | -0,04478  | 2,287947 | 0,059933 | 0,0841099 |
| c-Abl       | 0,118939 | 0,015301  | 2,172045 | 0,070568 | 0,0973764 |
| Smad3       | 0,11821  | -0,139148 | 0,958144 | 0,373195 | 0,4267554 |
| A-Raf       | 0,108797 | -0,10837  | 1,961889 | 0,095005 | 0,1275342 |
| c-Jun_pS73  | 0,106923 | -0,34266  | 1,761632 | 0,126097 | 0,1605466 |
| GCLM        | 0,094828 | -0,078361 | 1,893753 | 0,104626 | 0,1374601 |
| PLC-gamma:  | 0,093728 | 0,104     | 1,902321 | 0,103365 | 0,1372836 |
| C-Raf_pS3:  | 0,08842  | -0,395141 | 1,749967 | 0,128188 | 0,1623709 |
| RPA32_pS4   | 0,08104  | -0,492589 | 0,878326 | 0,411911 | 0,4667061 |
| MEK1_pS2    | 0,071031 | -0,091517 | 1,206356 | 0,27089  | 0,3171079 |
| DJ-1        | 0,060863 | -0,074525 | 0,935965 | 0,383663 | 0,4367036 |
| Bcl-xL      | 0,052279 | -0,129883 | 1,046435 | 0,333722 | 0,3833918 |
| U-Histone-  | 0,037331 | 0,043273  | 0,397148 | 0,704325 | 0,7531093 |
| Akt         | 0,032079 | -0,04836  | 0,486619 | 0,642945 | 0,6965234 |
| IR-b        | 0,031783 | 0,316294  | 0,225578 | 0,828649 | 0,8457697 |
| Aurora-B    | 0,030001 | -0,078913 | 0,331881 | 0,750711 | 0,7919369 |
| Sox2        | 0,028433 | -0,098909 | 0,367761 | 0,725056 | 0,7686211 |
| Src_pY527   | 0,022202 | -0,353822 | 0,418916 | 0,689144 | 0,7400808 |
| D-a-Tubulin | 0,017926 | -0,076422 | 0,328062 | 0,753462 | 0,7919369 |
| clAP        | 0,014827 | -0,039698 | 0,238545 | 0,819006 | 0,8393962 |
| MDM2_pS:    | 0,009568 | -0,205456 | 0,088181 | 0,932461 | 0,9400729 |
| PKC-delta_  | 0,009284 | -0,030647 | 0,158939 | 0,878675 | 0,8894786 |
| NAPSIN-A    | 0,003427 | -0,199106 | 0,033002 | 0,974691 | 0,9746906 |
| eIF4E_pS2C  | 0,002538 | -0,087934 | 0,0336   | 0,974232 | 0,9746906 |
| Ets-1       | -0,00842 | -0,015073 | -0,16254 | 0,875957 | 0,8894786 |
| Rictor      | -0,01333 | -0,193772 | -0,24154 | 0,816783 | 0,8393962 |
| JNK2        | -0,01507 | -0,023068 | -0,25977 | 0,803298 | 0,8336747 |
| DUSP4       | -0,01817 | -0,174693 | -0,30705 | 0,768672 | 0,8044994 |
| p38_pT180   | -0,01984 | -0,059012 | -0,276   | 0,791352 | 0,824742  |
| PAICS       | -0,02576 | 0,095129  | -0,24407 | 0,814904 | 0,8393962 |
| Sf1n11      | -0,03327 | -0,091667 | -0,36891 | 0,72424  | 0,7686211 |
| 14-3-3_beta | -0,03672 | -0,03757  | -0,60925 | 0,563605 | 0,6159749 |
| p53         | -0,04621 | -0,07412  | -0,70626 | 0,505217 | 0,5595896 |
| PDK1        | -0,05047 | -0,14768  | -0,74929 | 0,480636 | 0,5371812 |
| TUFM        | -0,05267 | -0,066776 | -0,69002 | 0,514708 | 0,5675577 |
| ER-alpha_f  | -0,05461 | -0,008113 | -0,71014 | 0,502968 | 0,5595896 |
| c-Myc       | -0,06045 | -0,404563 | -0,68072 | 0,520194 | 0,5710574 |
| MERIT40_f   | -0,07311 | 0,13586   | -0,5356  | 0,610552 | 0,6643448 |
| FoxM1       | -0,07797 | 0,059247  | -0,85536 | 0,42359  | 0,4777478 |
| Claudin-7   | -0,07815 | -0,34963  | -1,25117 | 0,255196 | 0,3001594 |
| Notch3      | -0,08199 | -0,092046 | -1,52618 | 0,175339 | 0,2133429 |
| CD20        | -0,08368 | 0,172599  | -1,58464 | 0,161643 | 0,1997521 |
| RBM15       | -0,08377 | 0,02746   | -1,53398 | 0,173451 | 0,2120923 |
| p27-Kip-1   | -0,08378 | -0,179609 | -1,35737 | 0,221134 | 0,2625964 |



|             |          |           |          |          |           |
|-------------|----------|-----------|----------|----------|-----------|
| 14-3-3_beta | -0,0366  | -0,045484 | -0,61735 | 0,549669 | 0,6199463 |
| Smad1       | -0,0399  | 0,026621  | -0,35583 | 0,728754 | 0,775872  |
| Jagged1     | -0,04015 | 0,160316  | -0,19628 | 0,847997 | 0,8727302 |
| PKC_delta   | -0,04355 | -0,07185  | -0,89381 | 0,390713 | 0,4684759 |
| Heregulin   | -0,04479 | -0,211387 | -0,24282 | 0,812649 | 0,8433794 |
| MMP2        | -0,0474  | 0,052953  | -0,98348 | 0,346679 | 0,426019  |
| IRF-1       | -0,05491 | 0,04805   | -0,81101 | 0,434694 | 0,5088597 |
| STING       | -0,06749 | 0,211912  | -0,10141 | 0,921061 | 0,9362228 |
| LRP6_pS14   | -0,0724  | -0,15063  | -0,94618 | 0,36454  | 0,4441738 |
| MAPK_pT2    | -0,1042  | -0,095589 | -0,54094 | 0,599423 | 0,658033  |
| Rad51       | -0,12134 | 0,229754  | -0,88946 | 0,392944 | 0,4688757 |
| PDK1_pS24   | -0,12291 | 0,169696  | -1,70236 | 0,116972 | 0,1679774 |
| p70-S6K1    | -0,12351 | 0,129352  | -1,00516 | 0,336594 | 0,4156942 |
| p21         | -0,12913 | -0,253731 | -1,41581 | 0,18474  | 0,246653  |
| Creb        | -0,13563 | 0,050198  | -2,6463  | 0,022878 | 0,0434674 |
| IGF1R_pY1   | -0,14277 | 0,030049  | -2,1569  | 0,054193 | 0,0874881 |
| IR-b        | -0,15029 | 0,174263  | -0,7185  | 0,487553 | 0,5575264 |
| eEF2K       | -0,15551 | 0,19831   | -0,71006 | 0,492563 | 0,5606592 |
| PTEN        | -0,16174 | -0,237569 | -0,94207 | 0,366548 | 0,4441738 |
| TTF1        | -0,16512 | 0,039481  | -2,9145  | 0,014186 | 0,0284879 |
| OCT4        | -0,17705 | 0,042496  | -3,68896 | 0,003618 | 0,00961   |
| FoxO3a      | -0,1888  | -0,009503 | -2,29361 | 0,04269  | 0,0727205 |
| PEA15       | -0,1898  | 0,194478  | -1,43683 | 0,178817 | 0,2400428 |
| GATA6       | -0,18983 | -0,206902 | -2,21413 | 0,049057 | 0,0807804 |
| Jak2        | -0,19383 | 0,01048   | -2,52848 | 0,028205 | 0,0504822 |
| ER-alpha    | -0,19453 | 0,052902  | -3,15482 | 0,009251 | 0,0204008 |
| XBP1        | -0,19696 | 0,006864  | -4,28252 | 0,001317 | 0,0040676 |
| SDHA        | -0,19726 | -0,186767 | -2,58089 | 0,025699 | 0,0473706 |
| PREX1       | -0,19958 | 0,220191  | -2,42653 | 0,033783 | 0,0600322 |
| Mcl-1       | -0,20119 | -0,117005 | -0,75625 | 0,465519 | 0,5398267 |
| JNK_pT183   | -0,20163 | 0,079326  | -2,08504 | 0,061368 | 0,0959359 |
| FoxM1       | -0,21101 | -0,066612 | -2,36236 | 0,037832 | 0,065806  |
| B-Raf_pS44  | -0,21397 | -0,024011 | -1,6566  | 0,126047 | 0,176895  |
| COG3        | -0,21831 | -0,254581 | -1,31567 | 0,215261 | 0,282817  |
| INPP4b      | -0,2184  | -0,019661 | -3,74148 | 0,003304 | 0,0090666 |
| CD134       | -0,23267 | 0,027245  | -3,45868 | 0,005409 | 0,0133595 |
| MERIT40_f   | -0,24118 | -0,017598 | -2,18225 | 0,051857 | 0,0842679 |
| p38_MAPK    | -0,24121 | 0,080272  | -1,68139 | 0,121056 | 0,1708614 |
| N-Cadherin  | -0,25227 | -0,047889 | -1,68977 | 0,119409 | 0,1704862 |
| HER3_pY12   | -0,2527  | 0,035728  | -3,6702  | 0,003738 | 0,0098224 |
| Glutamate   | -0,26454 | 0,049489  | -2,943   | 0,013484 | 0,0272993 |
| CD20        | -0,28029 | -0,006524 | -3,7106  | 0,003485 | 0,0094595 |
| SLC1A5      | -0,28694 | 0,184915  | -1,26037 | 0,233826 | 0,3023821 |
| PD-L1       | -0,29215 | -0,023057 | -5,77988 | 1,27E-04 | 5,80E-04  |
| ZAP-70      | -0,29337 | 0,082267  | -3,03637 | 0,011418 | 0,0239012 |
| Beclin      | -0,30749 | 0,030434  | -4,99438 | 4,16E-04 | 0,0015821 |
| P-Cadherin  | -0,30802 | 0,109523  | -3,43219 | 0,005666 | 0,0135884 |
| Rab25       | -0,31623 | -0,072747 | -4,07211 | 0,001876 | 0,005516  |
| Mnk1        | -0,31864 | 0,168786  | -2,7471  | 0,019118 | 0,037778  |
| cdc25C      | -0,32948 | 0,176967  | -2,05459 | 0,064672 | 0,1004658 |
| ATM_pS19    | -0,33532 | 0,002799  | -7,52054 | 1,23E-05 | 1,12E-04  |
| MIF         | -0,34484 | -0,038735 | -4,13008 | 0,001701 | 0,0050618 |
| G6PD        | -0,35346 | -0,118073 | -2,2265  | 0,048009 | 0,080123  |
| PR          | -0,35651 | 0,049608  | -6,40147 | 5,26E-05 | 3,02E-04  |
| FAK_pY397   | -0,35757 | 0,306504  | -0,85553 | 0,410652 | 0,4853166 |
| DM-Histon   | -0,36085 | 0,075023  | -4,6957  | 6,69E-04 | 0,0023286 |
| Gab2        | -0,36871 | 0,167786  | -1,26068 | 0,233719 | 0,3023821 |
| Tuberin_pT  | -0,37218 | 0,042294  | -4,68225 | 6,84E-04 | 0,0023466 |
| STAT5-alpha | -0,40104 | -0,212767 | -2,65449 | 0,022546 | 0,0431703 |
| CD4         | -0,41325 | 0,069014  | -5,17645 | 3,14E-04 | 0,0012104 |
| ERCC5       | -0,419   | -0,018824 | -3,96449 | 0,002252 | 0,0065448 |
| GSK-3a-b_f  | -0,42261 | 0,040381  | -1,99485 | 0,071644 | 0,1085653 |
| VEGFR-2     | -0,42756 | 0,070836  | -2,55996 | 0,026672 | 0,0488002 |
| Fibronectin | -0,4348  | -0,068722 | -0,80195 | 0,439698 | 0,5122902 |
| Rictor_pT1  | -0,44919 | -0,011196 | -2,89756 | 0,014621 | 0,0291246 |
| SOD2        | -0,44982 | 0,008572  | -6,68145 | 3,60E-05 | 2,41E-04  |
| BRD4        | -0,45613 | -0,010498 | -6,96157 | 2,49E-05 | 1,86E-04  |
| PAK4        | -0,46359 | 0,132529  | -4,87975 | 4,99E-04 | 0,0018389 |
| Hexokinase  | -0,46452 | 0,025019  | -7,4514  | 1,34E-05 | 1,18E-04  |

|            |          |           |          |          |           |
|------------|----------|-----------|----------|----------|-----------|
| PR         | -0,09048 | 0,287013  | -1,77088 | 0,124464 | 0,1592882 |
| Atg3       | -0,09665 | 0,16516   | -0,84611 | 0,428357 | 0,4809286 |
| CD134      | -0,09835 | 0,158608  | -1,7218  | 0,133374 | 0,1680785 |
| TIGAR      | -0,09866 | -0,031474 | -1,83394 | 0,113861 | 0,1472443 |
| Stat3      | -0,10554 | 0,514912  | -2,07753 | 0,080657 | 0,1100685 |
| eIF4G      | -0,1067  | -0,10443  | -1,39794 | 0,209231 | 0,2508744 |
| AMPK-a2_j  | -0,11848 | -0,252242 | -1,3651  | 0,21882  | 0,2611044 |
| Rab11      | -0,11934 | -0,195639 | -1,11099 | 0,307043 | 0,3543911 |
| XBP1       | -0,12292 | 0,094257  | -2,48741 | 0,045337 | 0,0654866 |
| TAZ        | -0,12631 | -0,018387 | -1,53397 | 0,173452 | 0,2120923 |
| ERCC5      | -0,12795 | 0,247226  | -1,15828 | 0,28864  | 0,3362926 |
| b-Catenin  | -0,12941 | -0,007183 | -1,28495 | 0,243892 | 0,2882362 |
| IRF-1      | -0,13009 | 0,014927  | -2,03833 | 0,085258 | 0,1157078 |
| Heregulin  | -0,13374 | -0,254981 | -2,65088 | 0,036161 | 0,0528507 |
| OCT4       | -0,13794 | 0,10459   | -2,72506 | 0,032665 | 0,0488979 |
| FoxO3a     | -0,13835 | 0,061959  | -2,61028 | 0,03824  | 0,0555612 |
| Cyclin_D1  | -0,14334 | -0,106339 | -2,13945 | 0,073894 | 0,1013985 |
| E-Cadherin | -0,14595 | -1,573026 | -0,44404 | 0,671813 | 0,7246191 |
| MMP2       | -0,14934 | 0,002127  | -2,8531  | 0,027448 | 0,0426387 |
| B-Raf_pS44 | -0,15844 | 0,055994  | -2,77263 | 0,030613 | 0,0466748 |
| G6PD       | -0,16386 | 0,072803  | -1,40337 | 0,207682 | 0,2502312 |
| Creb       | -0,16469 | 0,062356  | -3,28144 | 0,015578 | 0,0261749 |
| Smad1      | -0,17317 | -0,044635 | -2,91578 | 0,025225 | 0,0396852 |
| MSH6       | -0,18649 | -0,043836 | -2,31558 | 0,057649 | 0,0813681 |
| TTF1       | -0,20318 | 0,052673  | -4,3103  | 0,004466 | 0,0095913 |
| INPP4b     | -0,20844 | 0,033968  | -3,0191  | 0,021972 | 0,0347891 |
| HSP70      | -0,20846 | -0,365392 | -1,98403 | 0,092073 | 0,1242738 |
| Jak2       | -0,21235 | 0,04166   | -3,77507 | 0,008384 | 0,015115  |
| DM-Histon  | -0,22316 | 0,236368  | -3,83638 | 0,007783 | 0,0143458 |
| PD-L1      | -0,22352 | 0,081866  | -4,11713 | 0,005577 | 0,0110677 |
| GSK-3a-b_j | -0,22529 | 0,250974  | -4,24644 | 0,004803 | 0,0101314 |
| p44-42-MA  | -0,22796 | 0,137085  | -4,1135  | 0,005601 | 0,0110677 |
| N-Cadherin | -0,23219 | 0,019196  | -4,78009 | 0,002661 | 0,0061419 |
| PEA15_pS1  | -0,23367 | -0,200361 | -1,60621 | 0,156849 | 0,1956648 |
| cdc25C     | -0,23414 | 0,306053  | -1,84101 | 0,112729 | 0,1465474 |
| Stat3_pY70 | -0,23629 | 0,395886  | -5,00692 | 0,002095 | 0,0051244 |
| ZAP-70     | -0,23925 | 0,178742  | -3,47374 | 0,012184 | 0,0208984 |
| Rictor_pT1 | -0,24618 | 0,208616  | -5,06932 | 0,001965 | 0,0049116 |
| ER-alpha   | -0,24776 | 0,063404  | -4,6993  | 0,002902 | 0,0066368 |
| Rab25      | -0,25567 | 0,032587  | -4,47119 | 0,003726 | 0,0081454 |
| Rad51      | -0,26234 | 0,171627  | -3,13177 | 0,018932 | 0,0307647 |
| HER3_pY12  | -0,26425 | 0,083933  | -4,52409 | 0,003514 | 0,0078198 |
| EGFR       | -0,2702  | -0,329884 | -1,42435 | 0,201796 | 0,2443318 |
| ATM_pS19   | -0,2758  | 0,111675  | -5,53879 | 0,001229 | 0,0033368 |
| Beclin     | -0,28202 | 0,112803  | -5,74327 | 0,001011 | 0,0028377 |
| HER3       | -0,28705 | -0,064588 | -4,18439 | 0,005159 | 0,0105306 |
| PDHK1      | -0,2881  | 0,170248  | -4,58055 | 0,003302 | 0,0074152 |
| NF-kB-p65  | -0,29675 | -0,299014 | -4,50104 | 0,003605 | 0,0079502 |
| SOD2       | -0,31034 | 0,190406  | -5,81696 | 9,43E-04 | 0,0027094 |
| p38_MAPK   | -0,31181 | 0,090537  | -5,08912 | 0,001925 | 0,0049116 |
| JNK_pT183  | -0,3144  | 0,055657  | -6,22359 | 6,51E-04 | 0,0020354 |
| Hexokinase | -0,32089 | 0,212545  | -5,7514  | 0,001003 | 0,0028377 |
| CD4        | -0,3285  | 0,210027  | -3,89766 | 0,007229 | 0,0135278 |
| Axl        | -0,34568 | 0,238258  | -6,02639 | 7,77E-04 | 0,0023137 |
| p70-S6K1   | -0,34604 | 0,022775  | -6,00728 | 7,91E-04 | 0,0023264 |
| Tuberin_pT | -0,34867 | 0,137605  | -6,78324 | 4,02E-04 | 0,0013797 |
| B7-H4      | -0,35764 | 0,196086  | -7,28396 | 2,68E-04 | 9,60E-04  |
| MIF        | -0,35975 | 0,027556  | -7,53573 | 2,21E-04 | 8,26E-04  |
| 53BP1      | -0,36826 | -0,440424 | -2,78543 | 0,030084 | 0,0461539 |
| Granzyme-  | -0,36875 | 0,378485  | -4,9506  | 0,002222 | 0,0053806 |
| PKM2       | -0,36988 | 0,193229  | -5,66983 | 0,001084 | 0,0030082 |
| Collagen_v | -0,38936 | 0,359319  | -3,44023 | 0,012712 | 0,0216539 |
| Mnk1       | -0,39088 | 0,194965  | -5,10519 | 0,001894 | 0,0049116 |
| Merlin     | -0,39201 | -0,407113 | -3,48727 | 0,011977 | 0,0206882 |
| PAR        | -0,41043 | -0,597385 | -3,94903 | 0,006799 | 0,0130871 |
| b-Actin    | -0,41302 | -0,225716 | -5,63988 | 0,001115 | 0,0030611 |
| BRD4       | -0,41397 | 0,114319  | -6,88796 | 3,69E-04 | 0,001283  |
| PDK1_pS24  | -0,42338 | 0,016233  | -6,74715 | 4,14E-04 | 0,0013834 |
| ULK1_pS75  | -0,42631 | 0,268754  | -6,28088 | 6,19E-04 | 0,0019593 |

|            |          |           |          |          |           |
|------------|----------|-----------|----------|----------|-----------|
| Atg3       | -0,46667 | -0,158672 | -4,70623 | 6,58E-04 | 0,0023222 |
| p44-42-MA  | -0,48204 | -0,120539 | -3,22509 | 0,008167 | 0,0186778 |
| B7-H4      | -0,49165 | 0,008408  | -8,41028 | 4,28E-06 | 6,21E-05  |
| PKM2       | -0,5135  | -0,004977 | -2,67252 | 0,021835 | 0,0421338 |
| SHP-2_pY5  | -0,52558 | -0,033828 | -5,68291 | 1,46E-04 | 6,45E-04  |
| PDHK1      | -0,53004 | -0,09056  | -9,83574 | 9,32E-07 | 2,09E-05  |
| ULK1_pS75  | -0,60626 | 0,028512  | -6,83676 | 2,93E-05 | 2,07E-04  |
| B-Raf      | -0,62237 | 0,028469  | -5,20918 | 2,98E-04 | 0,001188  |
| TFAM       | -0,63463 | 0,208887  | -3,86464 | 0,002672 | 0,0076739 |
| Axl        | -0,64741 | -0,084037 | -7,38521 | 1,45E-05 | 1,24E-04  |
| S6_pS240   | -0,69437 | -0,196608 | -1,51629 | 0,157871 | 0,2166337 |
| WIPI2      | -0,71436 | 0,135735  | -3,69479 | 0,003582 | 0,00961   |
| Collagen_V | -0,71767 | 0,005751  | -7,86435 | 8,08E-06 | 8,92E-05  |
| PKC-alpha  | -0,72069 | -0,189548 | -3,85003 | 0,00274  | 0,0077785 |
| MEK1       | -0,73088 | 0,271173  | -5,64225 | 1,55E-04 | 6,73E-04  |
| Stat3_pY7C | -0,7391  | -0,067062 | -7,84177 | 8,30E-06 | 8,92E-05  |
| NDRG1_pT   | -0,74879 | 0,569197  | -2,08564 | 0,061304 | 0,0959359 |
| Caveolin-1 | -0,77492 | 0,094879  | -2,19405 | 0,050804 | 0,0831027 |
| HSP27_pS8  | -0,81976 | 0,102724  | -6,4187  | 5,14E-05 | 3,02E-04  |
| PMS2       | -0,83606 | 0,28608   | -7,01512 | 2,32E-05 | 1,79E-04  |
| IGFRb      | -0,85389 | -0,226573 | -8,50891 | 3,82E-06 | 5,90E-05  |
| LDHA       | -0,86714 | 0,035181  | -6,00222 | 9,21E-05 | 4,46E-04  |
| TSC1       | -0,88574 | -0,037883 | -6,09638 | 8,05E-05 | 4,06E-04  |
| Atg7       | -0,89547 | 0,079798  | -6,81611 | 3,01E-05 | 2,07E-04  |
| Granzyme-  | -0,90222 | -0,138443 | -10,3752 | 5,48E-07 | 1,50E-05  |
| AMPK_pT1   | -0,98203 | -0,097621 | -5,5402  | 1,81E-04 | 7,69E-04  |
| Glutamina: | -0,9895  | -0,064521 | -5,18491 | 3,10E-04 | 0,0012104 |
| LC3A-B     | -1,00888 | 0,145092  | -9,86349 | 9,06E-07 | 2,09E-05  |
| Gys_pS641  | -1,07199 | -0,079185 | -15,6395 | 8,13E-09 | 5,02E-07  |
| YAP_pS127  | -1,07328 | -0,052866 | -6,0415  | 8,70E-05 | 4,30E-04  |
| TFRC       | -1,08901 | 0,387694  | -5,3443  | 2,43E-04 | 0,0010155 |
| Stat3      | -1,17491 | -0,383054 | -4,7085  | 6,56E-04 | 0,0023222 |
| MYH11      | -1,17492 | 0,096037  | -6,28033 | 6,22E-05 | 3,42E-04  |
| p70S6K_pT  | -1,23478 | -0,039359 | -6,59755 | 4,03E-05 | 2,62E-04  |
| Cyclin_B1  | -1,30657 | 0,212369  | -12,9819 | 5,63E-08 | 2,32E-06  |
| Gys        | -1,34938 | -0,101855 | -18,948  | 1,07E-09 | 1,33E-07  |
| Cox-IV     | -1,37704 | 0,154718  | -11,6248 | 1,74E-07 | 6,15E-06  |
| Myosin-IIa | -1,42752 | 0,113416  | -7,65622 | 1,04E-05 | 1,03E-04  |
| PLK1       | -1,44787 | 0,096759  | -9,42633 | 1,42E-06 | 2,91E-05  |
| TRIM25     | -1,51165 | 0,044582  | -7,62208 | 1,08E-05 | 1,03E-04  |
| S6_pS235   | -1,63268 | -0,119137 | -2,68167 | 0,021482 | 0,041779  |
| MCT4       | -2,06196 | -0,369449 | -8,01736 | 6,74E-06 | 8,49E-05  |
| PDGFR-b    | -4,12457 | -0,927044 | -45,2463 | 9,13E-14 | 2,25E-11  |

|            |          |           |          |          |           |
|------------|----------|-----------|----------|----------|-----------|
| SHP-2_pY5  | -0,44676 | 0,128133  | -7,35017 | 2,55E-04 | 9,25E-04  |
| LDHA       | -0,44762 | 0,476085  | -8,05559 | 1,50E-04 | 6,38E-04  |
| Glutamate- | -0,45124 | -0,004813 | -8,2162  | 1,34E-04 | 6,00E-04  |
| eEF2K      | -0,4514  | 0,054703  | -3,15247 | 0,018425 | 0,0301385 |
| PREX1      | -0,45485 | 0,110573  | -4,87965 | 0,002394 | 0,0056852 |
| 4E-BP1     | -0,47156 | -0,159597 | -7,88824 | 1,69E-04 | 6,86E-04  |
| Cox2       | -0,47292 | -1,051796 | -7,54332 | 2,19E-04 | 8,26E-04  |
| P-Cadherin | -0,4765  | 0,075639  | -5,44259 | 0,00135  | 0,0035975 |
| Jagged1    | -0,48167 | -0,095837 | -9,99258 | 4,19E-05 | 2,20E-04  |
| MEK1       | -0,48188 | 0,58004   | -7,78747 | 1,83E-04 | 7,27E-04  |
| Caveolin-1 | -0,4844  | 0,438262  | -4,86887 | 0,002421 | 0,0056956 |
| MCT4       | -0,49846 | 1,018534  | -6,5153  | 5,04E-04 | 0,0016613 |
| PEA15      | -0,49975 | 0,049919  | -3,19957 | 0,017324 | 0,028719  |
| TFAM       | -0,52316 | 0,414235  | -6,14579 | 6,98E-04 | 0,0021397 |
| WIPI2      | -0,52497 | 0,405226  | -2,88814 | 0,026181 | 0,0409279 |
| VASP       | -0,5466  | -0,637872 | -6,32922 | 5,93E-04 | 0,001902  |
| YAP_pS127  | -0,59724 | 0,466929  | -11,6211 | 1,69E-05 | 1,16E-04  |
| B-Raf      | -0,61625 | 0,167933  | -13,0013 | 8,51E-06 | 6,70E-05  |
| Gys        | -0,69854 | 0,583061  | -13,0449 | 8,34E-06 | 6,70E-05  |
| PKC-alpha  | -0,70746 | -0,024366 | -13,1365 | 7,99E-06 | 6,70E-05  |
| VEGFR-2    | -0,73937 | -0,022961 | -13,2104 | 7,72E-06 | 6,70E-05  |
| Gys_pS641  | -0,75884 | 0,342594  | -14,9396 | 3,62E-06 | 3,58E-05  |
| PAK4       | -0,77163 | 0,048855  | -14,9624 | 3,59E-06 | 3,58E-05  |
| S6_pS235   | -0,77487 | 0,751764  | -4,92621 | 0,002279 | 0,0054662 |
| Glutamina: | -0,77798 | 0,278284  | -11,5562 | 1,75E-05 | 1,17E-04  |
| FAK_pY397  | -0,8357  | 0,097646  | -12,5867 | 1,04E-05 | 7,77E-05  |
| PMS2       | -0,87153 | 0,44721   | -10,5314 | 3,06E-05 | 1,80E-04  |
| Atg7       | -0,88232 | 0,28306   | -18,5744 | 9,40E-07 | 1,11E-05  |
| TFRC       | -0,89641 | 0,740853  | -5,06731 | 0,001969 | 0,0049116 |
| HSP27_pS8  | -0,91256 | 0,225903  | -11,3629 | 1,93E-05 | 1,22E-04  |
| p70S6K_pT  | -0,94837 | 0,401891  | -7,75291 | 1,87E-04 | 7,34E-04  |
| LC3A-B     | -1,03592 | 0,348992  | -17,8253 | 1,21E-06 | 1,36E-05  |
| TSC1       | -1,05448 | 0,054131  | -20,1759 | 5,62E-07 | 8,67E-06  |
| MYH11      | -1,14658 | 0,369384  | -21,5179 | 3,76E-07 | 6,94E-06  |
| Cyclin_B1  | -1,16717 | 0,581082  | -23,7859 | 2,01E-07 | 4,51E-06  |
| NDRG1_pT   | -1,23107 | 0,443207  | -22,2046 | 3,09E-07 | 6,36E-06  |
| Cox-IV     | -1,23267 | 0,541782  | -18,8318 | 8,63E-07 | 1,11E-05  |
| PLK1       | -1,26306 | 0,523547  | -19,7823 | 6,35E-07 | 9,23E-06  |
| Myosin-IIa | -1,37016 | 0,459287  | -10,0217 | 4,12E-05 | 2,20E-04  |
| TRIM25     | -1,37016 | 0,459287  | -10,0217 | 4,12E-05 | 2,20E-04  |
| p16_INK4a  | -1,65739 | -0,777213 | -27,0609 | 8,95E-08 | 2,76E-06  |
| Gab2       | -1,68271 | -0,540172 | -27,826  | 7,52E-08 | 2,65E-06  |
| PDGFR-b    | -2,43191 | 0,988457  | -45,7566 | 3,29E-09 | 2,03E-07  |













|                    |          |           |          |          |           |          |
|--------------------|----------|-----------|----------|----------|-----------|----------|
| PAICS              | -0,30731 | -0,15572  | -5,0976  | 2,75E-04 | 0,0021143 | -0,48504 |
| DVL3               | -0,31665 | 0,097953  | -6,21043 | 4,80E-05 | 5,31E-04  | 1,34919  |
| mTOR               | -0,31753 | 0,02475   | -5,68632 | 1,07E-04 | 0,0010014 | 0,506244 |
| Akt1               | -0,32109 | -0,036534 | -1,77286 | 0,101971 | 0,2044161 | -6,41284 |
| Stat3_pY705        | -0,3245  | 0,23668   | -3,64101 | 0,003457 | 0,0163746 | -3,10895 |
| ERRalpha           | -0,32454 | -0,060608 | -5,79938 | 8,97E-05 | 8,78E-04  | 0,691262 |
| eEF2K              | -0,33215 | 0,045657  | -3,22723 | 0,007378 | 0,0308748 | -3,87829 |
| MLKL               | -0,33376 | -0,032043 | -2,70875 | 0,019206 | 0,0587069 | -4,83147 |
| Wee1               | -0,33378 | -0,01496  | -2,47799 | 0,029316 | 0,0801925 | -5,24429 |
| MITF               | -0,33833 | 0,104632  | -6,35878 | 3,86E-05 | 4,86E-04  | 1,580981 |
| RPA32              | -0,34532 | -0,242082 | -5,47934 | 1,48E-04 | 0,0012646 | 0,163012 |
| Jak2               | -0,34611 | 0,117213  | -3,97961 | 0,001877 | 0,0102422 | -2,48265 |
| VAV1               | -0,35286 | -0,053778 | -3,09766 | 0,00937  | 0,0363294 | -4,11854 |
| p38-MAPK           | -0,35463 | 0,104174  | -5,96883 | 6,91E-05 | 7,09E-04  | 0,965284 |
| PTEN               | -0,35736 | 0,327711  | -5,061   | 2,92E-04 | 0,0021683 | -0,54816 |
| GCN5L2             | -0,37165 | -0,152105 | -7,11823 | 1,31E-05 | 2,10E-04  | 2,721295 |
| Tyro3              | -0,38247 | 0,007668  | -6,64415 | 2,55E-05 | 3,55E-04  | 2,018466 |
| p70-S6K1           | -0,39486 | 0,134162  | -5,50817 | 1,41E-04 | 0,0012445 | 0,211165 |
| Src_pY527          | -0,39616 | 0,028145  | -5,38593 | 1,72E-04 | 0,0014253 | 0,006224 |
| Rictor             | -0,39956 | 0,284828  | -6,17974 | 5,03E-05 | 5,42E-04  | 1,300876 |
| Heregulin          | -0,4105  | 0,529459  | -5,11474 | 2,67E-04 | 0,002093  | -0,45554 |
| PLC-gamma2_pY759   | -0,42675 | -0,048337 | -4,85309 | 4,12E-04 | 0,0029141 | -0,91    |
| Akt                | -0,4348  | -0,027398 | -6,82411 | 1,98E-05 | 2,88E-04  | 2,288736 |
| Akt2_pS474         | -0,44435 | 0,456442  | -5,5679  | 1,29E-04 | 0,0011693 | 0,310577 |
| Mcl-1              | -0,44681 | 0,126503  | -5,88719 | 7,83E-05 | 7,85E-04  | 0,833756 |
| PKA-a              | -0,45301 | -0,147499 | -5,47293 | 1,50E-04 | 0,0012646 | 0,152283 |
| PHLPP              | -0,45585 | 0,138066  | -7,96525 | 4,30E-06 | 8,25E-05  | 3,905764 |
| Sox2               | -0,46061 | 0,345513  | -7,94658 | 4,40E-06 | 8,25E-05  | 3,880591 |
| GAPDH              | -0,46402 | -0,093054 | -6,51693 | 3,06E-05 | 4,13E-04  | 1,824783 |
| Akt1_pS473         | -0,47762 | 0,132057  | -7,75171 | 5,65E-06 | 1,02E-04  | 3,615459 |
| Stat5a             | -0,50318 | 0,376954  | -6,37435 | 3,77E-05 | 4,86E-04  | 1,605132 |
| RRM2               | -0,52111 | 0,068136  | -5,78366 | 9,19E-05 | 8,80E-04  | 0,665629 |
| b-Actin            | -0,5242  | -0,123301 | -5,56055 | 1,30E-04 | 0,0011693 | 0,298364 |
| Shc_pY317          | -0,5344  | 0,048967  | -6,23445 | 4,64E-05 | 5,26E-04  | 1,386934 |
| Stat3              | -0,54545 | 0,455546  | -4,81689 | 4,38E-04 | 0,003047  | -0,97355 |
| JNK_pT183_Y185     | -0,5871  | 0,06726   | -6,10202 | 5,65E-05 | 5,94E-04  | 1,177915 |
| FAK_pY397          | -0,655   | 0,127547  | -5,15556 | 2,50E-04 | 0,0019937 | -0,38541 |
| MMP14              | -0,68302 | -0,048973 | -10,5751 | 2,21E-07 | 5,96E-06  | 7,057217 |
| c-Met_pY1234_Y1235 | -0,6895  | -0,612021 | -6,81436 | 2,00E-05 | 2,88E-04  | 2,274211 |
| Src_pY416          | -0,71654 | 0,071301  | -6,95875 | 1,64E-05 | 2,52E-04  | 2,488164 |
| HER2_pY1248        | -0,72084 | 0,074269  | -5,08225 | 2,82E-04 | 0,0021304 | -0,5115  |
| HES1               | -0,72648 | -0,136402 | -2,76109 | 0,017441 | 0,0548696 | -4,73656 |
| FRS2-a_pY196       | -0,79217 | 0,09159   | -6,24453 | 4,57E-05 | 5,26E-04  | 1,402745 |
| cdc2_pY15          | -0,80946 | -0,23913  | -11,0781 | 1,34E-07 | 3,85E-06  | 7,591198 |
| Coup-TFII          | -0,84072 | 0,178384  | -11,8459 | 6,44E-08 | 2,14E-06  | 8,367896 |
| Chk1               | -0,85974 | -0,197309 | -15,041  | 4,50E-09 | 2,16E-07  | 11,18095 |
| DUSP6              | -0,90276 | 0,129979  | -15,1602 | 4,12E-09 | 2,16E-07  | 11,27484 |
| SHP-2_pY542        | -0,91189 | 0,322221  | -7,1277  | 1,30E-05 | 2,10E-04  | 2,735042 |
| Rad51              | -0,92203 | 0,041121  | -8,78008 | 1,59E-06 | 3,26E-05  | 4,965088 |
| Connexin-43        | -1,00379 | -0,052007 | -18,3876 | 4,58E-10 | 3,78E-08  | 13,57667 |
| Pyk2_pY402         | -1,02345 | 0,131592  | -8,81671 | 1,52E-06 | 3,26E-05  | 5,010972 |
| Hif-1-alpha        | -1,04734 | 0,203091  | -9,8255  | 4,87E-07 | 1,10E-05  | 6,220818 |
| Snail              | -1,38606 | 0,389254  | -18,747  | 3,67E-10 | 3,78E-08  | 13,80784 |

|             |          |           |          |          |           |          |
|-------------|----------|-----------|----------|----------|-----------|----------|
| PKC-b-II_pI | -0,14893 | 0,022917  | -1,32892 | 0,208933 | 0,5484457 | -6,61656 |
| Rictor      | -0,1544  | 0,284828  | -2,38797 | 0,03453  | 0,2450007 | -4,99167 |
| EMA         | -0,15474 | 0,046986  | -0,71361 | 0,489307 | 0,838916  | -7,23675 |
| IDO         | -0,15487 | -0,045778 | -1,33572 | 0,206767 | 0,5484457 | -6,60804 |
| ATM         | -0,15562 | 0,084602  | -1,48376 | 0,164015 | 0,509804  | -6,41498 |
| PHLPP       | -0,15905 | 0,138066  | -2,77914 | 0,01687  | 0,1656751 | -4,29492 |
| PAK4        | -0,16293 | 0,010678  | -3,27263 | 0,006787 | 0,0886378 | -3,38785 |
| Akt         | -0,16642 | -0,027398 | -2,61191 | 0,022946 | 0,1939187 | -4,5963  |
| ATRX        | -0,16836 | 0,050761  | -1,53137 | 0,151966 | 0,502496  | -6,34991 |
| GCLC        | -0,1712  | -0,02283  | -2,37336 | 0,035457 | 0,2450007 | -5,01705 |
| FOXO3       | -0,1723  | 0,039835  | -1,67056 | 0,121025 | 0,4616099 | -6,15204 |
| PLC-gamma1  | -0,17834 | -0,048337 | -2,02811 | 0,065676 | 0,3277096 | -5,59866 |
| Erk5        | -0,18134 | -0,046955 | -2,39804 | 0,033905 | 0,2450007 | -4,97413 |
| VASP        | -0,18221 | 0,087681  | -2,68052 | 0,020229 | 0,1816439 | -4,47319 |
| Gab2        | -0,18294 | 0,045631  | -2,14896 | 0,053053 | 0,2931512 | -5,3995  |
| MLKL        | -0,18411 | -0,032043 | -1,4942  | 0,161307 | 0,509804  | -6,40084 |
| 53BP1       | -0,18424 | 0,410082  | -2,10585 | 0,057269 | 0,3105905 | -5,47115 |
| Akt1        | -0,18804 | -0,036534 | -1,03822 | 0,319917 | 0,676246  | -6,94863 |
| GSK-3B      | -0,18819 | 0,32798   | -1,83018 | 0,092514 | 0,3801027 | -5,91233 |
| Akt1_pS47   | -0,18971 | 0,132057  | -3,07886 | 0,009701 | 0,1226175 | -3,74609 |
| p53         | -0,1926  | 0,265969  | -2,25128 | 0,04419  | 0,2645265 | -5,22698 |
| PRAS40_p1   | -0,19377 | 0,125751  | -3,76293 | 0,002772 | 0,0522848 | -2,47979 |
| FRS2-a_pY   | -0,19741 | 0,09159   | -1,55616 | 0,146001 | 0,4944847 | -6,3155  |
| p70-S6K_p   | -0,19983 | 0,269091  | -1,59917 | 0,136127 | 0,4848836 | -6,25491 |
| GAPDH       | -0,20186 | -0,093054 | -2,83502 | 0,015218 | 0,1561705 | -4,19331 |
| PKD1        | -0,20918 | -0,003713 | -2,3071  | 0,039968 | 0,2610029 | -5,13151 |
| PTPN12      | -0,2106  | 0,448663  | -3,71753 | 0,003009 | 0,0522848 | -2,56363 |
| 4E-BP1_pT   | -0,21502 | -0,149083 | -2,76025 | 0,017468 | 0,1656751 | -4,32919 |
| Sifn11      | -0,21667 | -0,015227 | -1,48223 | 0,164415 | 0,509804  | -6,41704 |
| Akt2_pS47   | -0,21976 | 0,456442  | -2,75364 | 0,017682 | 0,1656751 | -4,34116 |
| JNK_pT183   | -0,22435 | 0,06726   | -2,33181 | 0,038225 | 0,2534579 | -5,08896 |
| Rad23A      | -0,22733 | -0,014213 | -1,28859 | 0,222167 | 0,5534901 | -6,66638 |
| Src_pY416   | -0,22829 | 0,071301  | -2,21701 | 0,046989 | 0,2736773 | -5,28513 |
| Akt_pT308   | -0,23395 | 0,127704  | -3,38497 | 0,00552  | 0,0793074 | -3,17963 |
| FAK_pY397   | -0,23423 | 0,127547  | -1,84365 | 0,090409 | 0,3783138 | -5,89152 |
| Pyk2_pY40   | -0,23779 | 0,131592  | -2,04848 | 0,063368 | 0,3251399 | -5,56547 |
| Akt_pS473   | -0,24707 | 0,399518  | -2,47815 | 0,029308 | 0,2177851 | -4,83377 |
| Gys_pS641   | -0,24799 | 0,273752  | -3,0151  | 0,010914 | 0,1237839 | -3,86353 |
| ULK1_pS75   | -0,25007 | 0,319938  | -4,66656 | 5,65E-04 | 0,0203077 | -0,84296 |
| mTOR        | -0,26135 | 0,02475   | -4,68024 | 5,52E-04 | 0,0203077 | -0,8188  |
| Src_pY527   | -0,26204 | 0,028145  | -3,56249 | 0,003989 | 0,0614001 | -2,85053 |
| IGF1R_pY1   | -0,26236 | -0,141052 | -4,24708 | 0,001169 | 0,0296286 | -1,59372 |
| c-Met_pY1   | -0,26245 | -0,612021 | -2,59384 | 0,02372  | 0,1965997 | -4,6286  |
| PTEN        | -0,26701 | 0,327711  | -3,78148 | 0,00268  | 0,0522848 | -2,44556 |
| mTOR_pS2    | -0,2714  | 0,087497  | -3,75756 | 0,002799 | 0,0522848 | -2,48969 |
| WIPI2       | -0,27549 | -0,02897  | -2,09508 | 0,058371 | 0,3105905 | -5,48895 |
| SHP-2_pY5   | -0,29038 | 0,322221  | -2,26975 | 0,042748 | 0,2645265 | -5,19549 |
| Shc_pY317   | -0,29926 | 0,048967  | -3,49128 | 0,004543 | 0,0675184 | -2,9825  |
| Stat5a      | -0,33847 | 0,376954  | -4,28781 | 0,001088 | 0,0293093 | -1,52003 |
| HER2_pY12   | -0,42823 | 0,074269  | -3,01925 | 0,01083  | 0,1237839 | -3,8559  |
| S6_pS240    | -0,43847 | 0,524502  | -3,69037 | 0,003161 | 0,0523966 | -2,61383 |
| S6_pS235    | -0,47719 | 0,525909  | -2,61345 | 0,022882 | 0,1939187 | -4,59355 |
| JNK2        | -0,55213 | 0,368288  | -7,08148 | 1,38E-05 | 8,51E-04  | 3,03862  |



**Table S8:** Cell cycle distribution of the *MMTV-R26<sup>Met</sup>* MGT cell lines - Statistical analysis.

|              |    | MGT2 |     |   |    |    | MGT4 |     |     |     |    | MGT9 |     |     |     |    | MGT11 |     |     |     |    | MGT13 |     |     |     |    |
|--------------|----|------|-----|---|----|----|------|-----|-----|-----|----|------|-----|-----|-----|----|-------|-----|-----|-----|----|-------|-----|-----|-----|----|
|              |    | G0   | G1  | S | G2 | M  | G0   | G1  | S   | G2  | M  | G0   | G1  | S   | G2  | M  | G0    | G1  | S   | G2  | M  | G0    | G1  | S   | G2  | M  |
| <b>MGT7</b>  | G0 | ***  |     |   |    |    | ***  |     |     |     |    | ***  |     |     |     |    | ***   |     |     |     |    | ***   |     |     |     |    |
|              | G1 |      | *** |   |    |    |      | *** |     |     |    |      | *** |     |     |    |       | *** |     |     |    |       | *** |     |     |    |
|              | S  |      |     | * |    |    |      |     | *** |     |    |      |     | *** |     |    |       |     | *** |     |    |       |     | *** |     |    |
|              | G2 |      |     |   | ns |    |      |     |     | *** |    |      |     |     | *** |    |       |     |     | *** |    |       |     |     | *** |    |
|              | M  |      |     |   |    | ns |      |     |     |     | ns |      |     |     |     | ns |       |     |     |     | ns |       |     |     |     | ns |
|              |    |      |     |   |    |    |      |     |     |     |    |      |     |     |     |    |       |     |     |     |    |       |     |     |     |    |
| <b>MGT2</b>  | G0 |      |     |   |    |    | ***  |     |     |     |    | ***  |     |     |     |    | ***   |     |     |     |    | ***   |     |     |     |    |
|              | G1 |      |     |   |    |    |      | *   |     |     |    |      | *** |     |     |    |       | ns  |     |     |    |       | ns  |     |     |    |
|              | S  |      |     |   |    |    |      |     | *** |     |    |      |     | *** |     |    |       |     | *** |     |    |       |     | ns  |     |    |
|              | G2 |      |     |   |    |    |      |     |     | *** |    |      |     |     | ns  |    |       |     |     | *** |    |       |     |     | *** |    |
|              | M  |      |     |   |    |    |      |     |     |     | ns |      |     |     |     | ns |       |     |     |     | ns |       |     |     |     | ns |
| <b>MGT4</b>  | G0 |      |     |   |    |    |      |     |     |     |    | ns   |     |     |     |    | ns    |     |     |     |    | *     |     |     |     |    |
|              | G1 |      |     |   |    |    |      |     |     |     |    |      | ns  |     |     |    |       | ns  |     |     |    |       | *** |     |     |    |
|              | S  |      |     |   |    |    |      |     |     |     |    |      |     | ns  |     |    |       |     | *   |     |    |       |     | ns  |     |    |
|              | G2 |      |     |   |    |    |      |     |     |     |    |      |     |     | *   |    |       |     |     | ns  |    |       |     |     | **  |    |
|              | M  |      |     |   |    |    |      |     |     |     |    |      |     |     |     | ns |       |     |     |     | ns |       |     |     |     | ns |
| <b>MGT9</b>  | G0 |      |     |   |    |    |      |     |     |     |    |      |     |     |     |    | ns    |     |     |     |    | **    |     |     |     |    |
|              | G1 |      |     |   |    |    |      |     |     |     |    |      |     |     |     |    |       | *** |     |     |    |       | *** |     |     |    |
|              | S  |      |     |   |    |    |      |     |     |     |    |      |     |     |     |    |       |     | ns  |     |    |       |     | **  |     |    |
|              | G2 |      |     |   |    |    |      |     |     |     |    |      |     |     |     |    |       |     |     | ns  |    |       |     |     | *** |    |
|              | M  |      |     |   |    |    |      |     |     |     |    |      |     |     |     |    |       |     |     |     | ns |       |     |     |     | ns |
| <b>MGT11</b> | G0 |      |     |   |    |    |      |     |     |     |    |      |     |     |     |    |       |     |     |     |    | ***   |     |     |     |    |
|              | G1 |      |     |   |    |    |      |     |     |     |    |      |     |     |     |    |       |     |     |     |    |       | *   |     |     |    |
|              | S  |      |     |   |    |    |      |     |     |     |    |      |     |     |     |    |       |     |     |     |    |       |     | *** |     |    |
|              | G2 |      |     |   |    |    |      |     |     |     |    |      |     |     |     |    |       |     |     |     |    |       |     |     | *** |    |
|              | M  |      |     |   |    |    |      |     |     |     |    |      |     |     |     |    |       |     |     |     |    |       |     |     |     | ns |
| <b>MGT13</b> | G0 |      |     |   |    |    |      |     |     |     |    |      |     |     |     |    |       |     |     |     |    |       |     |     |     |    |
|              | G1 |      |     |   |    |    |      |     |     |     |    |      |     |     |     |    |       |     |     |     |    |       |     |     |     |    |
|              | S  |      |     |   |    |    |      |     |     |     |    |      |     |     |     |    |       |     |     |     |    |       |     |     |     |    |
|              | G2 |      |     |   |    |    |      |     |     |     |    |      |     |     |     |    |       |     |     |     |    |       |     |     |     |    |
|              | M  |      |     |   |    |    |      |     |     |     |    |      |     |     |     |    |       |     |     |     |    |       |     |     |     |    |

**Table S9:** In vitro tumorigenic capacity of the *MMTV-R26<sup>Met</sup>* cell lines, as determined by the tumour sphere assay - Statistical analysis.

|       |          | Passage 1 |            |            |             |            |               |            |            | Passage 3  |            |           |            |
|-------|----------|-----------|------------|------------|-------------|------------|---------------|------------|------------|------------|------------|-----------|------------|
|       |          | MGT2      |            | MGT4       |             | MGT11      |               | MGT13      |            | MGT11      |            | MGT13     |            |
|       |          | 50-100µm  | >100µm     | 50-100µm   | >100µm      | 50-100µm   | >100µm        | 50-100µm   | >100µm     | 50-100µm   | >100µm     | 50-100µm  | >100µm     |
| MGT7  | 50-100µm | 0.034 (*) |            | 0.086 (ns) |             | 0.005 (**) |               | 0.003 (**) |            |            |            |           |            |
|       | >100µm   |           | 0.116 (ns) |            | 0.116 (ns)  |            | <0.0001 (***) |            | 0.007 (**) |            |            |           |            |
| MGT2  | 50-100µm |           |            | 0.113 (ns) |             | 0.006 (**) |               | 0.003 (**) |            |            |            |           |            |
|       | >100µm   |           |            |            | >0.999 (ns) |            | <0.0001 (***) |            | 0.008 (**) |            |            |           |            |
| MGT4  | 50-100µm |           |            |            |             | 0.055 (ns) |               | 0.008 (**) |            | 0.798 (ns) |            | 0.032 (*) |            |
|       | >100µm   |           |            |            |             |            | <0.0001 (***) |            | 0.008 (**) |            | 0.009 (**) |           | 0.021 (*)  |
| MGT11 | 50-100µm |           |            |            |             |            |               | 0.039 (*)  |            |            |            | 0.019 (*) |            |
|       | >100µm   |           |            |            |             |            |               |            | 0.036 (*)  |            |            |           | 0.198 (ns) |

**Table S10** : Migrating capacity of the *MMTV-R26<sup>Met</sup>* cell lines - Statistical analysis.

|              | <b>MGT7</b> | <b>MGT2</b>    | <b>MGT4</b>    | <b>MGT9</b>     | <b>MGT11</b>     | <b>MGT13</b>     |
|--------------|-------------|----------------|----------------|-----------------|------------------|------------------|
| <b>MGT7</b>  |             | 0.2249<br>(ns) | 0.0178<br>(* ) | 0.0002<br>(***) | <0.0001<br>(***) | <0.0001<br>(***) |
| <b>MGT2</b>  |             |                | 0.6052<br>(ns) | 0.0139<br>(* )  | 0.0053<br>(**)   | <0.0001<br>(***) |
| <b>MGT4</b>  |             |                |                | 0.4207<br>(ns)  | 0.2363<br>(ns)   | <0.0001<br>(***) |
| <b>MGT9</b>  |             |                |                |                 | 0.9987<br>(ns)   | <0.0001<br>(***) |
| <b>MGT11</b> |             |                |                |                 |                  | 0.0002<br>(***)  |
| <b>MGT13</b> |             |                |                |                 |                  |                  |

**Table S11:** Cell cycle distribution of MGT11 treated cells - Statistical analysis.

|                   |    | A11 |    |    |    |    | Adav |     |    |     |    | A11 + Adav |     |    |     |    |
|-------------------|----|-----|----|----|----|----|------|-----|----|-----|----|------------|-----|----|-----|----|
|                   |    | G0  | G1 | S  | G2 | M  | G0   | G1  | S  | G2  | M  | G0         | G1  | S  | G2  | M  |
| <b>no</b>         | G0 | ns  |    |    |    |    | ns   |     |    |     |    | ns         |     |    |     |    |
|                   | G1 |     | ns |    |    |    |      | ns  |    |     |    |            | *** |    |     |    |
|                   | S  |     |    | ns |    |    |      |     | ns |     |    |            |     | ns |     |    |
|                   | G2 |     |    |    | ns |    |      |     |    | *** |    |            |     |    | *** |    |
|                   | M  |     |    |    |    | ns |      |     |    |     | ns |            |     |    |     | ns |
| <b>A11</b>        | G0 |     |    |    |    |    | ns   |     |    |     |    | ns         |     |    |     |    |
|                   | G1 |     |    |    |    |    |      | *** |    |     |    |            | *   |    |     |    |
|                   | S  |     |    |    |    |    |      |     | ns |     |    |            |     | ns |     |    |
|                   | G2 |     |    |    |    |    |      |     |    | *** |    |            |     |    | *** |    |
|                   | M  |     |    |    |    |    |      |     |    |     | ns |            |     |    |     | ns |
| <b>Adav</b>       | G0 |     |    |    |    |    |      |     |    |     |    | ns         |     |    |     |    |
|                   | G1 |     |    |    |    |    |      |     |    |     |    |            | ns  |    |     |    |
|                   | S  |     |    |    |    |    |      |     |    |     |    |            |     | ns |     |    |
|                   | G2 |     |    |    |    |    |      |     |    |     |    |            |     |    | ns  |    |
|                   | M  |     |    |    |    |    |      |     |    |     |    |            |     |    |     | ns |
| <b>A11 + Adav</b> | G0 |     |    |    |    |    |      |     |    |     |    |            |     |    |     |    |
|                   | G1 |     |    |    |    |    |      |     |    |     |    |            |     |    |     |    |
|                   | S  |     |    |    |    |    |      |     |    |     |    |            |     |    |     |    |
|                   | G2 |     |    |    |    |    |      |     |    |     |    |            |     |    |     |    |
|                   | M  |     |    |    |    |    |      |     |    |     |    |            |     |    |     |    |

**Table S12:** Antibodies used in the study.

| Antibody                                | Company                 | Reference | Dilution | Used for | TritonX-100 (%) for IF |
|-----------------------------------------|-------------------------|-----------|----------|----------|------------------------|
| Estrogen receptor alpha (ER $\alpha$ )  | Santa Cruz              | sc-8005   | 1:100    | IHC      | 0.5 %                  |
| Progesteron receptor (PR)               | Santa Cruz              | sc-810    | 1:200    | IHC      | 0.5 %                  |
| Human EGFR2 (HER2)                      | Cell Signaling          | 2165      | 1:200    | IHC      | 0.2 %                  |
| MET                                     | Santa Cruz              | sc-10     | 1:50     | IHC      | 0.2 %                  |
| Ki67                                    | Cell Signaling          | 9129      | 1:400    | IHC      | 0.5 %                  |
| Ki67                                    | Dako                    | M7249     | 1:100    | IF       | 0.1 %                  |
| Krt14                                   | Covalab                 | Mab71720  | 1:500    | IF       | 0.5 %                  |
| Krt18                                   | Covalab                 | Mab20042  | 1:500    | IF       | 0.5 %                  |
| human MET                               | Assay Design            | 905-076   | 1:150    | IF       | 0.5 %                  |
| pY <sub>1234/35</sub> MET               | Cell Signaling          | 3126L     | 1:50     | IF       | 0.5 %                  |
| pH3 (S10)                               | Millipore               | 06-570    | 1 : 500  | IF       | 0.3 %                  |
| alpha-Tubulin                           | Sigma                   | T5168     | 1 : 5000 | IF       | 0.3 %                  |
| Vimentin                                | Abcam                   | Ab-8979   | 1:100    | IF       | 0.5 %                  |
| pS <sub>139</sub> H2AX ( $\gamma$ H2AX) | Cell Signaling          | 9718      | 1 : 400  | IF, WB   | 0.2 %                  |
| Actin                                   | Sigma                   | A3853     | 1:6000   | WB       |                        |
| ATM                                     | Cell Signaling          | 2873      | 1:1000   | WB       |                        |
| pS <sub>1987</sub> ATM                  | Invitrogen              | PA5-37346 | 1:1000   | WB       |                        |
| ATR                                     | Cell Signaling          | 13934     | 1:1000   | WB       |                        |
| pS <sub>428</sub> ATR                   | Cell Signaling          | 2853      | 1:1000   | WB       |                        |
| pS <sub>473</sub> AKT                   | Cell Signaling          | 9271      | 1:2000   | WB       |                        |
| BCL-XL                                  | Transduction Laboratory | B22620    | 1:500    | WB       |                        |
| BIM                                     | Santa Cruz              | sc-11425  | 1:1000   | WB       |                        |
| Cleaved-Caspase 3                       | Cell Signaling          | 9661      | 1:1000   | WB       |                        |
| CDC2 (CDK1)                             | Cell Signaling          | 28493     | 1:20000  | WB       |                        |
| pY <sub>15</sub> CDC2(CDK1)             | Cell Signaling          | 4539      | 1:1000   | WB       |                        |
| pT <sub>202/204</sub> ERKs              | Cell Signaling          | 9106      | 1:10000  | WB       |                        |
| pY <sub>627</sub> GAB1                  | Cell Signaling          | 3231      | 1:2000   | WB       |                        |
| MCL1                                    | Santa Cruz              | sc-819    | 1:1000   | WB       |                        |
| pS <sub>217/221</sub> MEK               | Cell Signaling          | 9121      | 1:1000   | WB       |                        |
| mouse MET                               | Santa Cruz              | sc-8057   | 1:500    | WB       |                        |
| MET <sup>25H2</sup>                     | Cell Signaling          | 3127      | 1:1000   | WB       |                        |
| human MET                               | Santa Cruz              | sc-161    | 1:1000   | WB       |                        |

|                                     |                               |             |        |      |  |
|-------------------------------------|-------------------------------|-------------|--------|------|--|
| pY <sub>1234/35</sub> MET           | Cell Signaling                | 3126        | 1:2000 | WB   |  |
| PARP                                | Cell Signaling                | 9546S       | 1:2000 | WB   |  |
| P53                                 | Novocastra                    | CM5         | 1:1000 | WB   |  |
| pS <sub>15</sub> P53                | Cell Signaling                | 9284        | 1:1000 | WB   |  |
| RB                                  | Cell Signaling                | 9313        | 1:1000 | WB   |  |
| pS <sub>795</sub> RB                | Abcam                         | Ab47474     | 1:1000 | WB   |  |
| RPA32 (B-4)                         | Santa Cruz                    | sc-271578   | 1:200  | WB   |  |
| pS <sub>33</sub> RPA32              | Bethyl                        | A300-246A   | 1:5000 | WB   |  |
| RRM2                                | abbexa                        | Abx004031   | 1:5000 | WB   |  |
| pY <sub>705</sub> STAT3             | Cell Signaling                | 9145S       | 1:2000 | WB   |  |
| XIAP                                | Transduction laboratory       | 610716      | 1:3000 | WB   |  |
| Goat anti-rabbit IgG-<br>peroxidase | Jackson<br>Immuno<br>Research | 115-035-144 | 1:4000 | WB   |  |
| Goat anti-mouse IgG-<br>peroxidase  | Jackson<br>Immuno<br>Research | 115-035-146 | 1:4000 | WB   |  |
| CD24-BV421<br>(clone M1/29)         | Biolegend                     | 101826      | 1:400  | FACS |  |
| CD29-FITC<br>(clone HMb1-1)         | eBioscience                   | 11-0291-82  | 1:400  | FACS |  |
| CD61-biotin<br>(clone 2C9.G3)       | eBioscience                   | 13-0611-81  | 1:400  | FACS |  |
| anti-Ki67-APC<br>(clone SolA15)     | eBioscience                   | 17-5698-82  | 1:200  | FACS |  |
| Streptavidin, APC-AF750             | Invitrogen                    | SA1027      | 1:200  | FACS |  |
| Annexin V                           | eBioscience                   | 88-8005-72  | 1:20   | FACS |  |

**Table S13:** Drugs used for cell viability assays, with the indicated targets and the concentrations used.

| Drug                  | Company               | Target                                         | Concentration ( $\mu$ M) |
|-----------------------|-----------------------|------------------------------------------------|--------------------------|
| 3-Methyladenine (3MA) | TargetMol             | Autophagy inhibitor                            | 1mM                      |
| 5-Fluorouracil (5-FU) | Targetmol             | Thymidylate synthase (nucleotide synthesis)    | 0.4, 2, 10               |
| A-1155463             | Selleckchem/Targetmol | Bcl-xL                                         | 0.3, 1, 3, 10            |
| ABT-737               | Selleckchem           | Bcl-2,Bcl-xL,Bcl-w                             | 1, 3, 10                 |
| ABT-199               | Selleckchem           | Bcl-2                                          | 1, 3, 10                 |
| Adavosertib           | Selleckchem           | Wee1                                           | 1, 3, 10                 |
| Adavosertib(MK-1775)  | Targetmol             | Wee1                                           | 1, 3, 10                 |
| AZD6738               | Targetmol             | ATR                                            | 1, 3, 10                 |
| CB-839                | Selleckchem           | Glutaminase                                    | 1, 3, 10                 |
| Cisplatin             | MedChem Express       | DNA replication                                | 1, 3, 10                 |
| Docetaxel             | Targetmol             | Beta-tubulin (microtubule inhibitor)           | 0.4, 2, 10               |
| Doxorubicin           | Targetmol             | intercalating agent                            | 0.04, 0.2, 1             |
| Erastin               | TargetMol             | Ferroptosis inducer                            | 0,5 - 1                  |
| Ferostatin-1          | TargetMol             | Ferroptosis inhibitor                          | 10, 20, 50, 100          |
| Gefitinib             | Calbiochem            | EGFR                                           | 1, 3, 10                 |
| JNJ-7706621           | Selleckchem           | pan-Cdk, Aurora A/B                            | 1, 3, 10                 |
| LY294002              | Calbiochem            | PI3K                                           | 1, 3, 10                 |
| Necrostatin-1         | TargetMol             | Necroptosis inhibitor                          | 10, 20, 50, 100          |
| Olaparib              | TargetMol             | PARP1/PARP2                                    | 1, 3, 10                 |
| PF-431396             | Selleckchem           | Pyk2/Fak                                       | 1, 3, 10                 |
| PHA-665752            | Tocris Bioscience     | Met                                            | 0.3, 1, 3                |
| R547                  | Selleckchem/Sigma     | Cdk1/2/4                                       | 1, 3, 10                 |
| SB225022              | TargetMol             | CXCR antagonist                                | 1, 3, 10                 |
| Selumetinib           | Selleckchem           | Mek1/2                                         | 1, 3, 10                 |
| Sorafenib             | Selleckchem           | Raf-1, B-Raf, Vegfr2, Pdgfr $\beta$ , Flt3,Kit | 1, 3, 10                 |
| Staurosporine         | TargetMol             | Apoptosis inducer                              | 150nM                    |
| WEHI-539              | Apexbio               | Bcl-xL                                         | 1, 3, 10                 |
| Z-VAD-FMK             | TargetMol             | Apoptosis inhibitor                            | 10, 20, 50, 100          |

**Table S14:** Oligonucleotides used for RT-qPCR experiments.

| Oligonucleotide (name) | Sequence (Forward)     | Sequence (Reverse)       |
|------------------------|------------------------|--------------------------|
| <i>Met</i> EXT(mouse)  | GTTCTGCTTGGCAACGAGAGCT | GGAGAATGCACTGTATTGCGTCG  |
| <i>Met</i> (mouse)     | GAATTGTCTGCCATTACAGG   | CAGCTCTTACTGTTATTGGCGC   |
| <i>Met</i> (human)     | CTGAAGCCGTTTTATGCAGC   | GCCACAGGAAAAACCCAAGTAG   |
| <i>Hgf</i>             | GTCCTGAAGGCTCAGACTTGGT | CCAGCCGTAAATACTGCAAGTGG  |
| <i>B2M</i>             | ACAGTTCCACCCGCCTCACATT | TAGAAAGACCAGTCCTTGCTGAAG |



**Table S15:** Proliferation capacity (mitotic index) of the *MMTV-R26<sup>Met</sup>* cell lines - Statistical analysis.

|              | <b>MGT7</b> | <b>MGT2</b>   | <b>MGT4</b>      | <b>MGT9</b>      | <b>MGT11</b>     | <b>MGT13</b>     |
|--------------|-------------|---------------|------------------|------------------|------------------|------------------|
| <b>MGT7</b>  |             | 0.549<br>(ns) | <0.0001<br>(***) | <0.0001<br>(***) | <0.0001<br>(***) | <0.0001<br>(***) |
| <b>MGT2</b>  |             |               | <0.0001<br>(***) | <0.0001<br>(***) | <0.0001<br>(***) | <0.0001<br>(***) |
| <b>MGT4</b>  |             |               |                  | 0.8339<br>(ns)   | 0.6485<br>(ns)   | 0.9936<br>(ns)   |
| <b>MGT9</b>  |             |               |                  |                  | 0.9996<br>(ns)   | 0.9824<br>(ns)   |
| <b>MGT11</b> |             |               |                  |                  |                  | 0.9121<br>(ns)   |
| <b>MGT13</b> |             |               |                  |                  |                  |                  |
